# Supplementary material for: Disruption of marine habitats by artificial light at night from global coastal megacities
Source: Oxford University Press journal article supplement (doi:10.1525/elementa.2022.00042), 2022-01-01
Supplement: alan_kd_falchi_megacities.xlsx [file alan_kd_falchi_megacities.xlsx]

## Sheet: BuenosAires
Latitude	Longitude	Month	ALAN_R(uW/m^2)	Kd_R(1/m)	ALAN_G(uW/m^2)	Kd_G(1/m)	ALAN_B(uW/m^2)	Kd_B(1/m)	Irr(uW/m^2)	Falchi(uCd/m^2)
-34.6041	-58.3834	1	117.931	1.44107	129.78	1.22267	124.801	2.38222	372.513	14.3957
-34.6041	-58.3834	2	117.931	2.60772	129.78	2.46977	124.801	4.74474	372.513	14.3957
-34.6041	-58.3834	3	117.931	2.20936	129.78	2.01293	124.801	3.80343	372.513	14.3957
-34.6041	-58.3834	4	117.931	2.01754	129.78	1.86507	124.801	3.62238	372.513	14.3957
-34.6041	-58.3834	5	117.931	0.561531	129.78	0.0947713	124.801	0.0647263	372.513	14.3957
-34.6041	-58.3834	6	117.931	0.609452	129.78	0.131055	124.801	0.108172	372.513	14.3957
-34.6041	-58.3834	7	117.931	0.628937	129.78	0.150546	124.801	0.145145	372.513	14.3957
-34.6041	-58.3834	8	117.931	0.620331	129.78	0.153183	124.801	0.175197	372.513	14.3957
-34.6041	-58.3834	9	117.931	0.606372	129.78	0.147648	124.801	0.180533	372.513	14.3957
-34.6041	-58.3834	10	117.931	0.596505	129.78	0.139284	124.801	0.167444	372.513	14.3957
-34.6041	-58.3834	11	117.931	1.38085	129.78	1.14889	124.801	2.23613	372.513	14.3957
-34.6041	-58.3834	12	117.931	1.43443	129.78	1.15934	124.801	2.1751	372.513	14.3957
			Average	1.22617		0.891263		1.65044
			Std	0.703653		0.835183		1.657

## Sheet: Eilat
Latitude	Longitude	Month	ALAN_R(uW/m^2)	Kd_R(1/m)	ALAN_G(uW/m^2)	Kd_G(1/m)	ALAN_B(uW/m^2)	Kd_B(1/m)	Irr(uW/m^2)	Falchi(uCd/m^2)
29.5375	34.9582	1	41.9535	0.533637	43.0725	0.0818622	70.7786	0.07366	155.805	2.47255
29.5375	34.9582	2	41.9535	0.533344	43.0725	0.077764	70.7786	0.0582824	155.805	2.47255
29.5375	34.9582	3	41.9535	0.533633	43.0725	0.0818065	70.7786	0.0734508	155.805	2.47255
29.5375	34.9582	4	41.9535	0.538048	43.0725	0.0858959	70.7786	0.0804127	155.805	2.47255
29.5375	34.9582	5	41.9535	0.533456	43.0725	0.079471	70.7786	0.0646836	155.805	2.47255
29.5375	34.9582	6	41.9535	0.533207	43.0725	0.0754646	70.7786	0.0495242	155.805	2.47255
29.5375	34.9582	7	41.9535	0.533251	43.0725	0.0762055	70.7786	0.0523546	155.805	2.47255
29.5375	34.9582	8	41.9535	0.533255	43.0725	0.0762847	70.7786	0.0526571	155.805	2.47255
29.5375	34.9582	9	41.9535	0.533201	43.0725	0.0753579	70.7786	0.0491162	155.805	2.47255
29.5375	34.9582	10	41.9535	0.533428	43.0725	0.0790495	70.7786	0.0631033	155.805	2.47255
29.5375	34.9582	11	41.9535	0.544447	43.0725	0.0946422	70.7786	0.101197	155.805	2.47255
29.5375	34.9582	12	41.9535	0.533808	43.0725	0.0843972	70.7786	0.0832065	155.805	2.47255
			Average	0.534726		0.0806834		0.0668041
			Std	0.00320067		0.0053706		0.0153826

## Sheet: Lagos
Latitude	Longitude	Month	ALAN_R(uW/m^2)	Kd_R(1/m)	ALAN_G(uW/m^2)	Kd_G(1/m)	ALAN_B(uW/m^2)	Kd_B(1/m)	Irr(uW/m^2)	Falchi(uCd/m^2)
6.52086	3.38326	1	37.2098	0.590343	37.6589	0.175501	67.4057	0.317849	142.274	1.72812
6.52086	3.38326	2	37.2098	0.671415	37.6589	0.284859	67.4057	0.548386	142.274	1.72812
6.52086	3.38326	3	37.2098	0.943697	37.6589	0.558704	67.4057	0.999541	142.274	1.72812
6.52086	3.38326	4	37.2098	0.805329	37.6589	0.352494	67.4057	0.530234	142.274	1.72812
6.52086	3.38326	5	37.2098	1.06676	37.6589	0.707253	67.4057	1.28904	142.274	1.72812
6.52086	3.38326	6	37.2098	1.10377	37.6589	0.709912	67.4057	1.22823	142.274	1.72812
6.52086	3.38326	7	37.2098	0.70132	37.6589	0.353619	67.4057	0.734541	142.274	1.72812
6.52086	3.38326	8	37.2098	0.840274	37.6589	0.540349	67.4057	1.12817	142.274	1.72812
6.52086	3.38326	9	37.2098	0.813679	37.6589	0.57908	67.4057	1.35468	142.274	1.72812
6.52086	3.38326	10	37.2098	0.922976	37.6589	0.945373	67.4057	2.43579	142.274	1.72812
6.52086	3.38326	11	37.2098	0.815097	37.6589	0.796768	67.4057	2.13436	142.274	1.72812
6.52086	3.38326	12	37.2098	0.806161	37.6589	0.475422	67.4057	0.978015	142.274	1.72812
			Average	0.840068		0.539944		1.1399
			Std	0.144992		0.216218		0.60223

## Sheet: Los Angeles
Latitude	Longitude	Month	ALAN_R(uW/m^2)	Kd_R(1/m)	ALAN_G(uW/m^2)	Kd_G(1/m)	ALAN_B(uW/m^2)	Kd_B(1/m)	Irr(uW/m^2)	Falchi(uCd/m^2)
34.0542	-118.242	1	104.643	0.566361	114.615	0.124908	115.352	0.172364	334.61	12.3104
34.0542	-118.242	2	104.643	0.546601	114.615	0.0960696	115.352	0.1023	334.61	12.3104
34.0542	-118.242	3	104.643	0.568203	114.615	0.150551	115.352	0.26551	334.61	12.3104
34.0542	-118.242	4	104.643	0.586574	114.615	0.165149	115.352	0.282606	334.61	12.3104
34.0542	-118.242	5	104.643	0.585511	114.615	0.147468	115.352	0.21884	334.61	12.3104
34.0542	-118.242	6	104.643	0.568077	114.615	0.119138	115.352	0.14682	334.61	12.3104
34.0542	-118.242	7	104.643	0.563212	114.615	0.114531	115.352	0.138914	334.61	12.3104
34.0542	-118.242	8	104.643	0.555826	114.615	0.105532	115.352	0.119893	334.61	12.3104
34.0542	-118.242	9	104.643	0.563203	114.615	0.112738	115.352	0.131982	334.61	12.3104
34.0542	-118.242	10	104.643	0.557035	114.615	0.109801	115.352	0.133734	334.61	12.3104
34.0542	-118.242	11	104.643	0.55618	114.615	0.106532	115.352	0.123303	334.61	12.3104
34.0542	-118.242	12	104.643	0.575421	114.615	0.131686	115.352	0.179575	334.61	12.3104
			Average	0.566017		0.123675		0.167987
			Std	0.0114538		0.0201571		0.0561064

## Sheet: Mumbai
Latitude	Longitude	Month	ALAN_R(uW/m^2)	Kd_R(1/m)	ALAN_G(uW/m^2)	Kd_G(1/m)	ALAN_B(uW/m^2)	Kd_B(1/m)	Irr(uW/m^2)	Falchi(uCd/m^2)
19.0792	72.8749	1	56.7757	1.38796	59.988	1.94729	81.3176	4.9957	198.081	4.7986
19.0792	72.8749	2	56.7757	1.37993	59.988	1.48592	81.3176	3.39939	198.081	4.7986
19.0792	72.8749	3	56.7757	1.20891	59.988	1.02236	81.3176	2.11291	198.081	4.7986
19.0792	72.8749	4	56.7757	1.1258	59.988	0.71415	81.3176	1.24205	198.081	4.7986
19.0792	72.8749	5	56.7757	1.16872	59.988	0.761945	81.3176	1.31728	198.081	4.7986
19.0792	72.8749	6	56.7757	0.801372	59.988	0.334621	81.3176	0.486461	198.081	4.7986
19.0792	72.8749	7	56.7757	0.749161	59.988	0.310151	81.3176	0.487905	198.081	4.7986
19.0792	72.8749	8	56.7757	0.847563	59.988	0.454118	81.3176	0.810418	198.081	4.7986
19.0792	72.8749	9	56.7757	1.16671	59.988	1.22795	81.3176	2.87597	198.081	4.7986
19.0792	72.8749	10	56.7757	1.0342	59.988	0.748186	81.3176	1.52283	198.081	4.7986
19.0792	72.8749	11	56.7757	1.06954	59.988	0.76191	81.3176	1.50321	198.081	4.7986
19.0792	72.8749	12	56.7757	1.15574	59.988	1.13179	81.3176	2.57331	198.081	4.7986
			Average	1.0913		0.908367		1.94395
			Std	0.197152		0.463468		1.27511

## Sheet: New York
Latitude	Longitude	Month	ALAN_R(uW/m^2)	Kd_R(1/m)	ALAN_G(uW/m^2)	Kd_G(1/m)	ALAN_B(uW/m^2)	Kd_B(1/m)	Irr(uW/m^2)	Falchi(uCd/m^2)
40.7125	-74.0084	1	91.617	1.37342	99.7497	1.46664	106.091	3.3436	297.457	10.2662
40.7125	-74.0084	2	91.617	1.3254	99.7497	1.57735	106.091	3.80872	297.457	10.2662
40.7125	-74.0084	3	91.617	0.581122	99.7497	0.123526	106.091	0.136909	297.457	10.2662
40.7125	-74.0084	4	91.617	0.634864	99.7497	0.155355	106.091	0.15704	297.457	10.2662
40.7125	-74.0084	5	91.617	0.676052	99.7497	0.305791	106.091	0.614103	297.457	10.2662
40.7125	-74.0084	6	91.617	0.721569	99.7497	0.316768	106.091	0.565425	297.457	10.2662
40.7125	-74.0084	7	91.617	0.711727	99.7497	0.308305	106.091	0.55396	297.457	10.2662
40.7125	-74.0084	8	91.617	0.693332	99.7497	0.306713	106.091	0.584203	297.457	10.2662
40.7125	-74.0084	9	91.617	0.650103	99.7497	0.179664	106.091	0.210134	297.457	10.2662
40.7125	-74.0084	10	91.617	0.665231	99.7497	0.205381	106.091	0.273425	297.457	10.2662
40.7125	-74.0084	11	91.617	0.594665	99.7497	0.140377	106.091	0.175325	297.457	10.2662
40.7125	-74.0084	12	91.617	1.28407	99.7497	1.45556	106.091	3.45752	297.457	10.2662
			Average	0.825963		0.54512		1.1567
			Std	0.292937		0.555909		1.38814

## Sheet: Plymouth Dockyard
Latitude	Longitude	Month	ALAN_R(uW/m^2)	Kd_R(1/m)	ALAN_G(uW/m^2)	Kd_G(1/m)	ALAN_B(uW/m^2)	Kd_B(1/m)	Irr(uW/m^2)	Falchi(uCd/m^2)
50.3792	-4.19174	1	38.9803	0.644155	39.6795	0.210113	68.6646	0.337541	147.324	2.00597
50.3792	-4.19174	2	38.9803	0.62758	39.6795	0.190333	68.6646	0.297496	147.324	2.00597
50.3792	-4.19174	3	38.9803	0.586877	39.6795	0.165652	68.6646	0.282832	147.324	2.00597
50.3792	-4.19174	4	38.9803	0.57689	39.6795	0.164014	68.6646	0.298179	147.324	2.00597
50.3792	-4.19174	5	38.9803	0.564108	39.6795	0.119869	68.6646	0.157753	147.324	2.00597
50.3792	-4.19174	6	38.9803	0.593931	39.6795	0.152377	68.6646	0.220031	147.324	2.00597
50.3792	-4.19174	7	38.9803	0.562085	39.6795	0.146236	68.6646	0.261461	147.324	2.00597
50.3792	-4.19174	8	38.9803	0.600585	39.6795	0.15417	68.6646	0.213413	147.324	2.00597
50.3792	-4.19174	9	38.9803	0.592137	39.6795	0.17093	68.6646	0.291954	147.324	2.00597
50.3792	-4.19174	10	38.9803	0.615935	39.6795	0.175887	68.6646	0.263959	147.324	2.00597
50.3792	-4.19174	11	38.9803	0.5734	39.6795	0.181125	68.6646	0.367883	147.324	2.00597
50.3792	-4.19174	12	38.9803	0.593693	39.6795	0.145052	68.6646	0.191997	147.324	2.00597
			Average	0.594281		0.164646		0.265375
			Std	0.0238925		0.0226458		0.0581487

## Sheet: Plymouth L4
Latitude	Longitude	Month	ALAN_R(uW/m^2)	Kd_R(1/m)	ALAN_G(uW/m^2)	Kd_G(1/m)	ALAN_B(uW/m^2)	Kd_B(1/m)	Irr(uW/m^2)	Falchi(uCd/m^2)
50.2708	-4.1334	1	26.8232	0.585608	25.8055	0.13738	60.0205	0.179775	112.649	0.0981571
50.2708	-4.1334	2	26.8232	0.64087	25.8055	0.181035	60.0205	0.239252	112.649	0.0981571
50.2708	-4.1334	3	26.8232	0.58659	25.8055	0.140935	60.0205	0.191292	112.649	0.0981571
50.2708	-4.1334	4	26.8232	0.580122	25.8055	0.165655	60.0205	0.296847	112.649	0.0981571
50.2708	-4.1334	5	26.8232	0.556146	25.8055	0.119882	60.0205	0.174394	112.649	0.0981571
50.2708	-4.1334	6	26.8232	0.549882	25.8055	0.107481	60.0205	0.139518	112.649	0.0981571
50.2708	-4.1334	7	26.8232	0.561162	25.8055	0.120705	60.0205	0.166929	112.649	0.0981571
50.2708	-4.1334	8	26.8232	0.561839	25.8055	0.148849	60.0205	0.272184	112.649	0.0981571
50.2708	-4.1334	9	26.8232	0.582261	25.8055	0.165572	60.0205	0.293254	112.649	0.0981571
50.2708	-4.1334	10	26.8232	0.573557	25.8055	0.15765	60.0205	0.280459	112.649	0.0981571
50.2708	-4.1334	11	26.8232	0.593756	25.8055	0.169038	60.0205	0.281287	112.649	0.0981571
50.2708	-4.1334	12	26.8232	0.59914	25.8055	0.170108	60.0205	0.274397	112.649	0.0981571
			Average	0.580911		0.148691		0.232466
			Std	0.0233327		0.0224933		0.0552926

## Sheet: Shanghai
Latitude	Longitude	Month	ALAN_R(uW/m^2)	Kd_R(1/m)	ALAN_G(uW/m^2)	Kd_G(1/m)	ALAN_B(uW/m^2)	Kd_B(1/m)	Irr(uW/m^2)	Falchi(uCd/m^2)
31.2292	121.475	1	74.7725	1.22786	80.5263	0.964723	94.1137	1.88471	249.413	7.62282
31.2292	121.475	2	74.7725	1.06415	80.5263	1.12615	94.1137	2.70486	249.413	7.62282
31.2292	121.475	3	74.7725	1.27876	80.5263	1.00131	94.1137	1.91621	249.413	7.62282
31.2292	121.475	4	74.7725	1.22515	80.5263	1.0731	94.1137	2.25543	249.413	7.62282
31.2292	121.475	5	74.7725	1.26745	80.5263	0.88197	94.1137	1.53277	249.413	7.62282
31.2292	121.475	6	74.7725	1.19083	80.5263	0.784404	94.1137	1.34981	249.413	7.62282
31.2292	121.475	7	74.7725	1.26194	80.5263	0.865517	94.1137	1.48737	249.413	7.62282
31.2292	121.475	8	74.7725	1.21876	80.5263	0.861989	94.1137	1.55663	249.413	7.62282
31.2292	121.475	9	74.7725	1.3207	80.5263	0.982223	94.1137	1.77481	249.413	7.62282
31.2292	121.475	10	74.7725	1.30409	80.5263	0.984031	94.1137	1.81145	249.413	7.62282
31.2292	121.475	11	74.7725	1.12173	80.5263	0.710914	94.1137	1.23932	249.413	7.62282
31.2292	121.475	12	74.7725	0.888776	80.5263	0.440012	94.1137	0.739683	249.413	7.62282
			Average	1.19752		0.889695		1.68775
			Std	0.11662		0.176014		0.480115

## Sheet: Tokyo
Latitude	Longitude	Month	ALAN_R(uW/m^2)	Kd_R(1/m)	ALAN_G(uW/m^2)	Kd_G(1/m)	ALAN_B(uW/m^2)	Kd_B(1/m)	Irr(uW/m^2)	Falchi(uCd/m^2)
35.5709	139.908	1	35.3592	0.882568	35.547	0.557683	66.0899	1.13469	136.996	1.43771
35.5709	139.908	2	35.3592	0.920468	35.547	0.650471	66.0899	1.40816	136.996	1.43771
35.5709	139.908	3	35.3592	0.902433	35.547	0.68234	66.0899	1.55175	136.996	1.43771
35.5709	139.908	4	35.3592	0.78155	35.547	0.510781	66.0899	1.15323	136.996	1.43771
35.5709	139.908	5	35.3592	0.691903	35.547	0.302688	66.0899	0.572936	136.996	1.43771
35.5709	139.908	6	35.3592	0.764395	35.547	0.394248	66.0899	0.761657	136.996	1.43771
35.5709	139.908	7	35.3592	0.883638	35.547	0.622972	66.0899	1.38726	136.996	1.43771
35.5709	139.908	8	35.3592	0.916178	35.547	0.6237	66.0899	1.32483	136.996	1.43771
35.5709	139.908	9	35.3592	1.00228	35.547	0.75406	66.0899	1.59608	136.996	1.43771
35.5709	139.908	10	35.3592	0.845202	35.547	0.525481	66.0899	1.08754	136.996	1.43771
35.5709	139.908	11	35.3592	0.842543	35.547	0.556508	66.0899	1.19754	136.996	1.43771
35.5709	139.908	12	35.3592	0.76	35.547	0.409258	66.0899	0.824019	136.996	1.43771
			Average	0.849429		0.549182		1.16664
			Std	0.0829947		0.124989		0.303735

[truncated: 1 more sheets: Rank analysis]
