# Supplementary material for: Disruption of marine habitats by artificial light at night from global coastal megacities
Source: Oxford University Press journal article supplement (doi:10.1525/elementa.2022.00042), 2022-01-01
Supplement: supplementary_figures_megacities_dosage_surface_intertidal.docx [file supplementary_figures_megacities_dosage_surface_intertidal.docx]

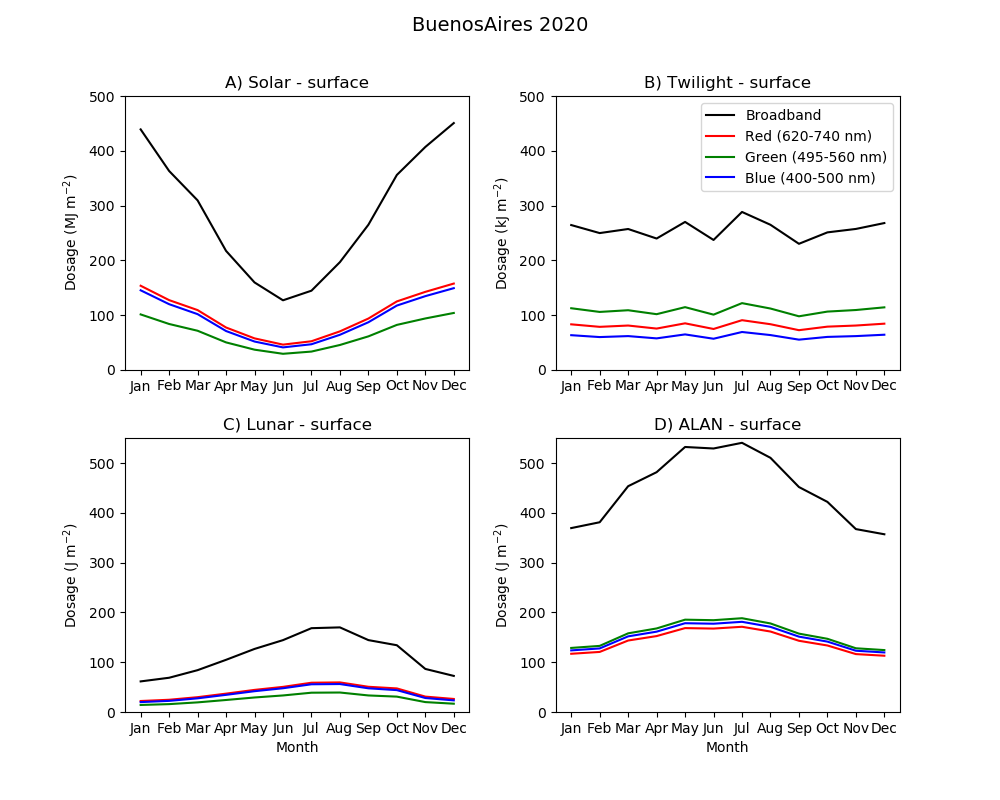


Figure S1: **Monthly integrated dosages of irradiance at the surface calculated for Buenos Aires (2020).** Model results for dosages of A) solar (MJ m–2), B) twilight (kJ m–2), C) lunar (J m–2) and D) artificial light at night (ALAN, J m–2); note the different units. Broadband (400–740 nm) is shown in black; spectral components, in blue (400–500 nm), green (495–560 nm) and red (620–740 nm).


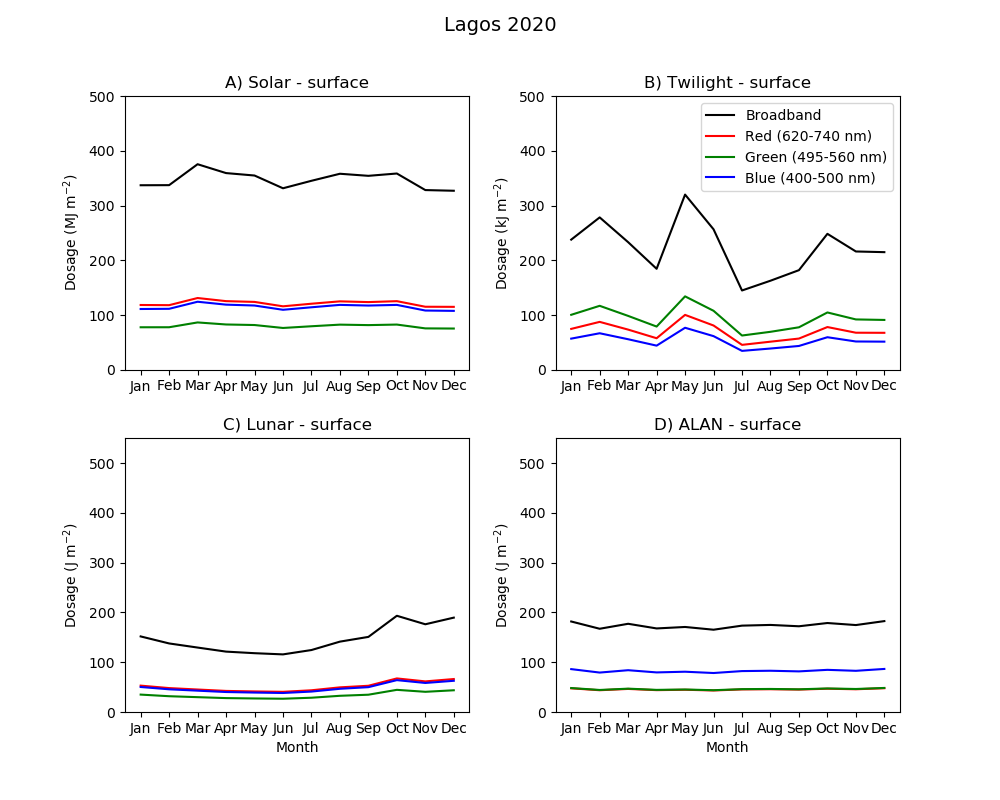


Figure S2: **Monthly integrated dosages of irradiance at the surface calculated for Lagos (2020).** Model results for dosages of A) solar (MJ m–2), B) twilight (kJ m–2), C) lunar (J m–2) and D) artificial light at night (ALAN, J m–2); note the different units. Broadband (400–740 nm) is shown in black; spectral components, in blue (400–500 nm), green (495–560 nm) and red (620–740 nm).


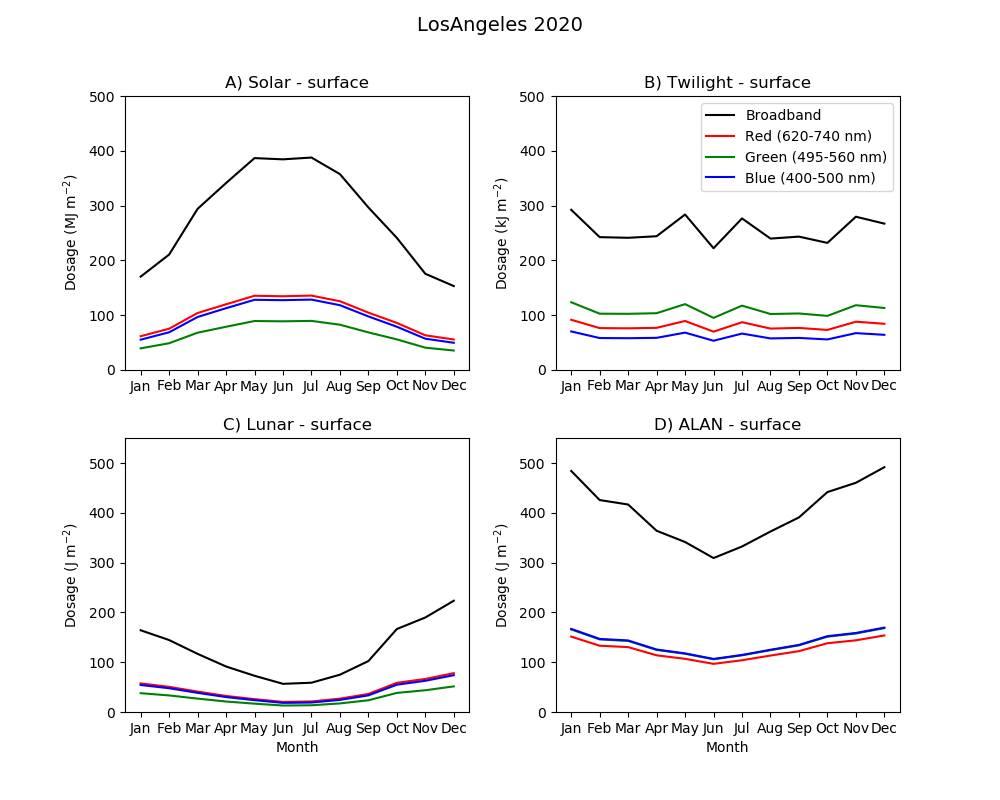


Figure S3: **Monthly integrated dosages of irradiance at the surface calculated for Los Angeles (2020).** Model results for dosages of A) solar (MJ m–2), B) twilight (kJ m–2), C) lunar (J m–2) and D) artificial light at night (ALAN, J m–2); note the different units. Broadband (400–740 nm) is shown in black; spectral components, in blue (400–500 nm), green (495–560 nm) and red (620–740 nm).


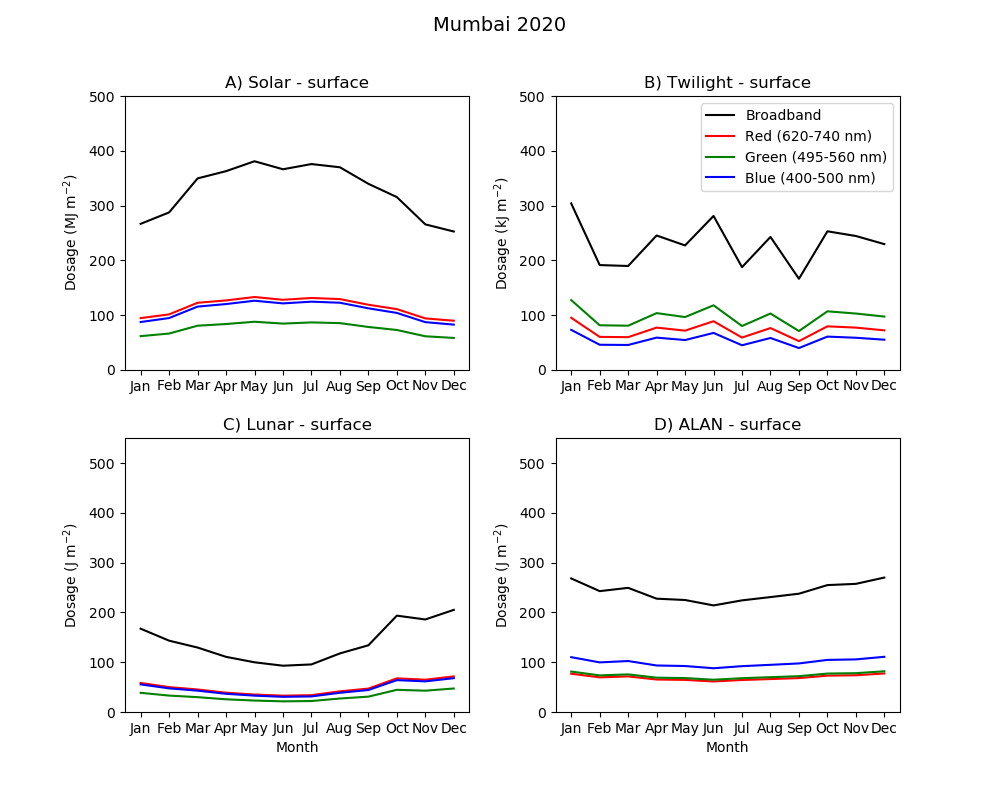


Figure S4: **Monthly integrated dosages of irradiance at the surface calculated for Mumbai (2020).** Model results for dosages of A) solar (MJ m–2), B) twilight (kJ m–2), C) lunar (J m–2) and D) artificial light at night (ALAN, J m–2); note the different units. Broadband (400–740 nm) is shown in black; spectral components, in blue (400–500 nm), green (495–560 nm) and red (620–740 nm).


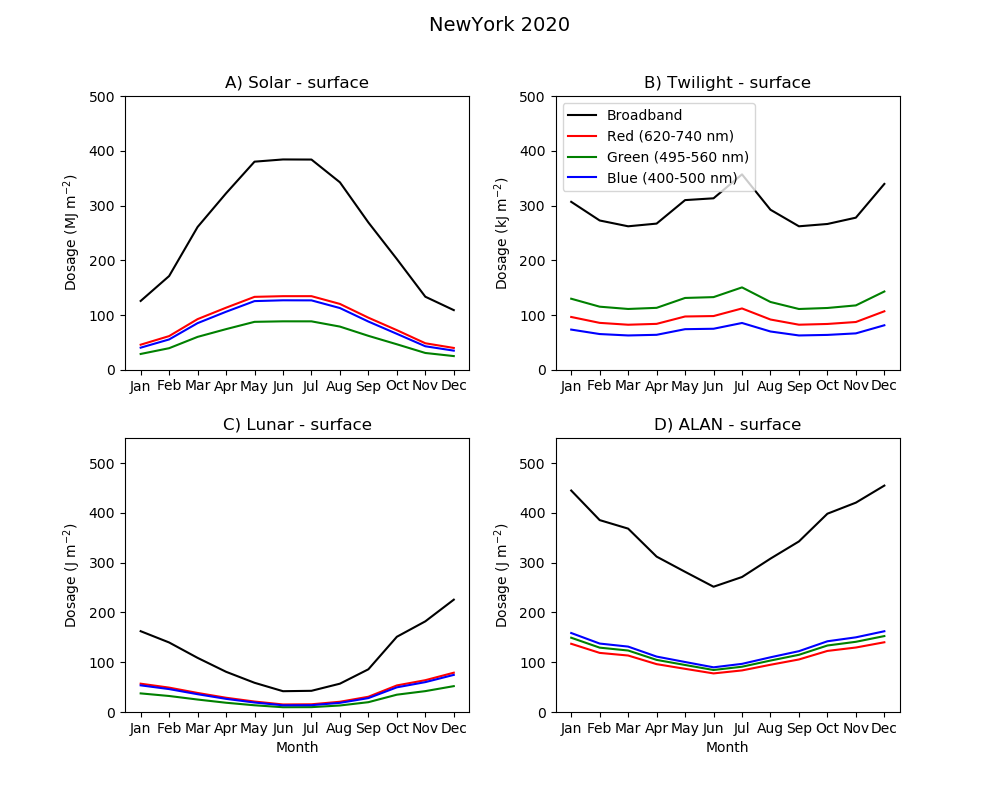


Figure S5: **Monthly integrated dosages of irradiance at the surface calculated for New York (2020).** Model results for dosages of A) solar (MJ m–2), B) twilight (kJ m–2), C) lunar (J m–2) and D) artificial light at night (ALAN, J m–2); note the different units. Broadband (400–740 nm) is shown in black; spectral components, in blue (400–500 nm), green (495–560 nm) and red (620–740 nm).


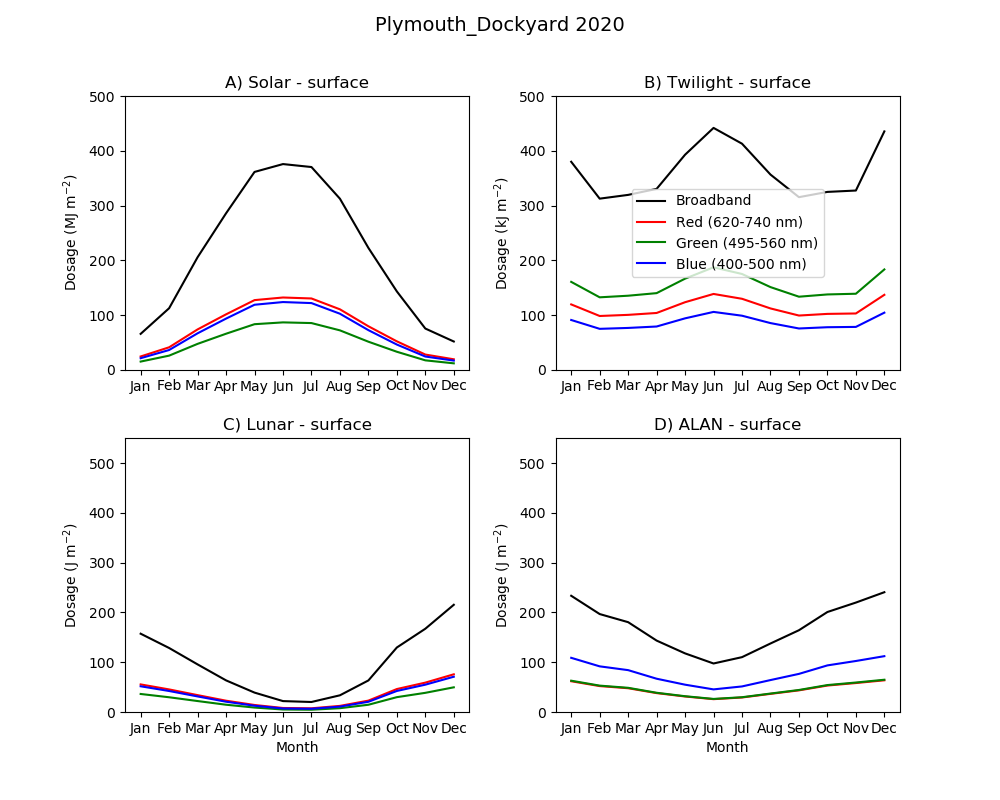


Figure S6: **Monthly integrated dosages of irradiance at the surface calculated for Plymouth (2020)** Model results for dosages of A) solar (MJ m–2), B) twilight (kJ m–2), C) lunar (J m–2) and D) artificial light at night (ALAN, J m–2); note the different units. Broadband (400–740 nm) is shown in black; spectral components, in blue (400–500 nm), green (495–560 nm) and red (620–740 nm).


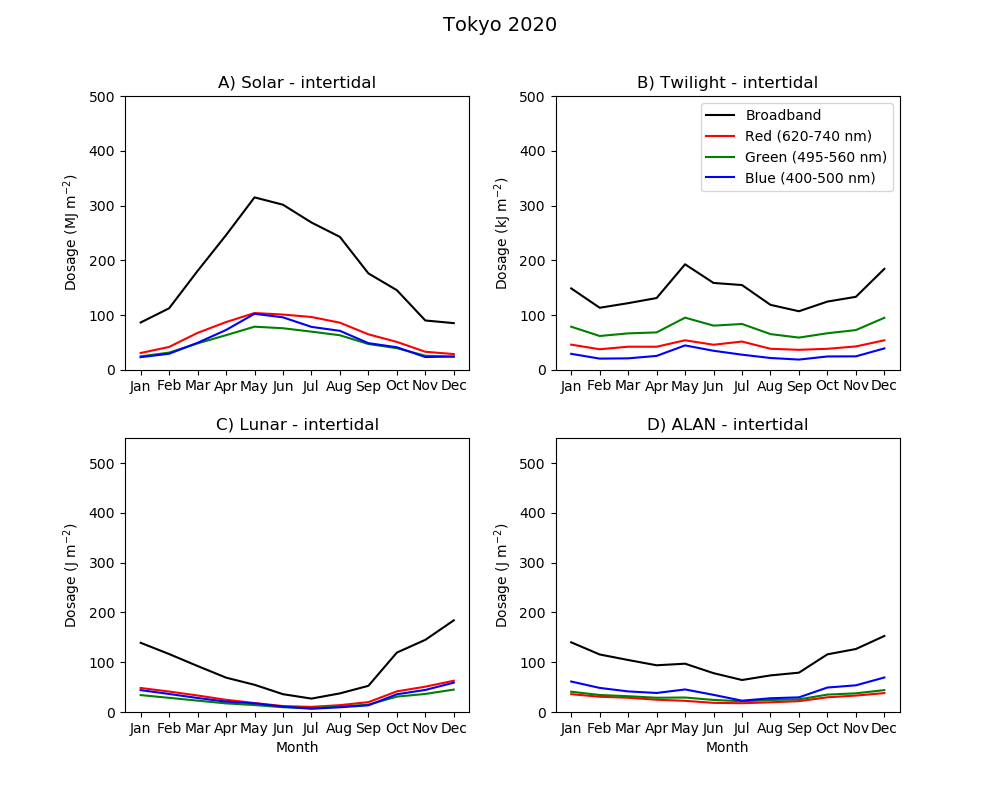


Figure S7: **Monthly integrated dosages of irradiance at the surface calculated for Tokyo (2020).** Model results for dosages of A) solar (MJ m–2), B) twilight (kJ m–2), C) lunar (J m–2) and D) artificial light at night (ALAN, J m–2); note the different units. Broadband (400–740 nm) is shown in black; spectral components, in blue (400–500 nm), green (495–560 nm) and red (620–740 nm).


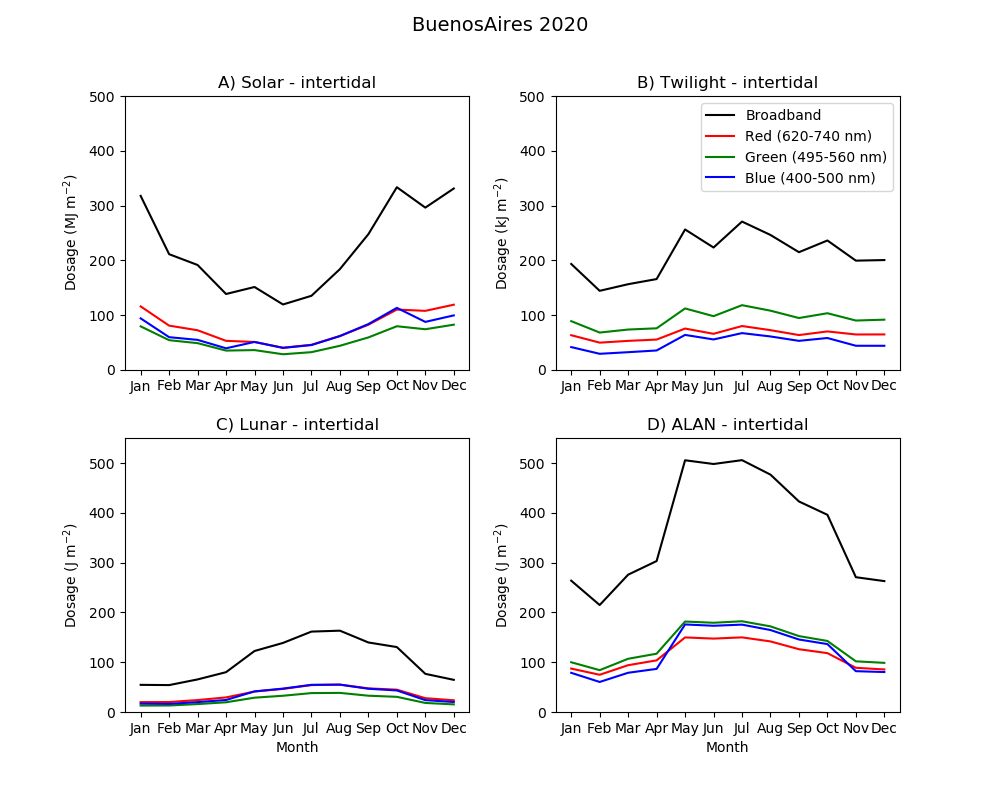


Figure S8: **Monthly integrated dosages of irradiance at the intertidal point calculated for Buenos Aires (2020).** Model results for dosages of A) solar (MJ m–2), B) twilight (kJ m–2), C) lunar (J m–2) and D) artificial light at night (ALAN, J m–2); note the different units. Broadband (400–740 nm) is shown in black; spectral components, in blue (400–500 nm), green (495–560 nm) and red (620–740 nm).


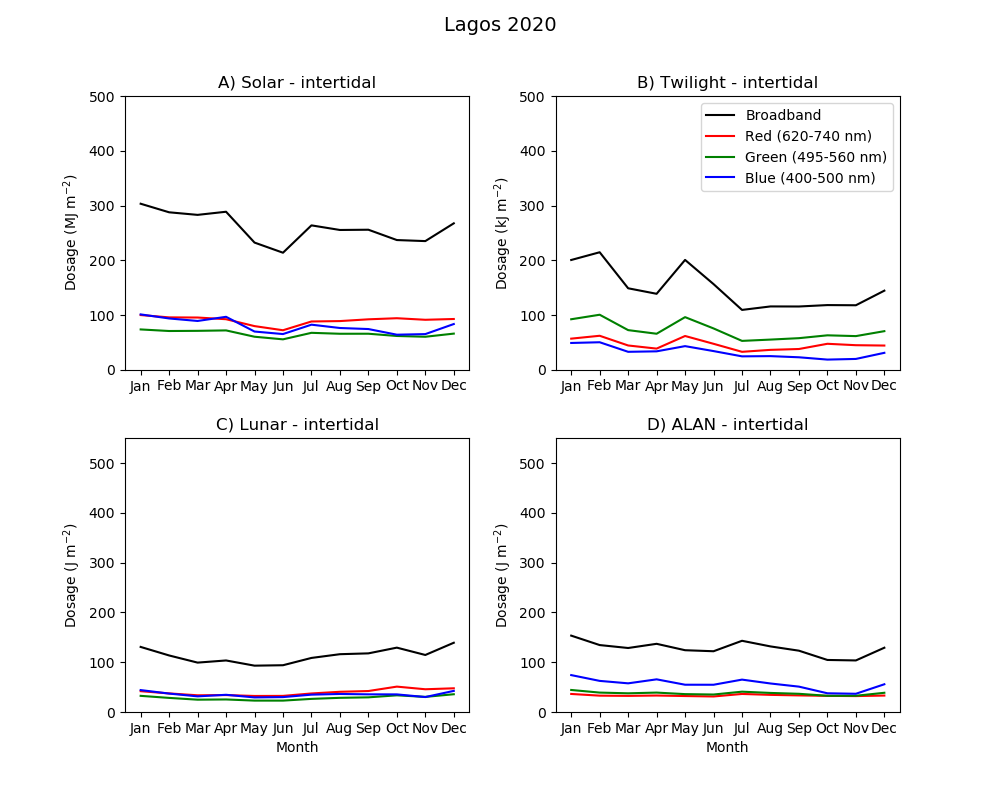


Figure S9: **Monthly integrated dosages of irradiance at the intertidal point calculated for Lagos (2020).** Model results for dosages of A) solar (MJ m–2), B) twilight (kJ m–2), C) lunar (J m–2) and D) artificial light at night (ALAN, J m–2); note the different units. Broadband (400–740 nm) is shown in black; spectral components, in blue (400–500 nm), green (495–560 nm) and red (620–740 nm).


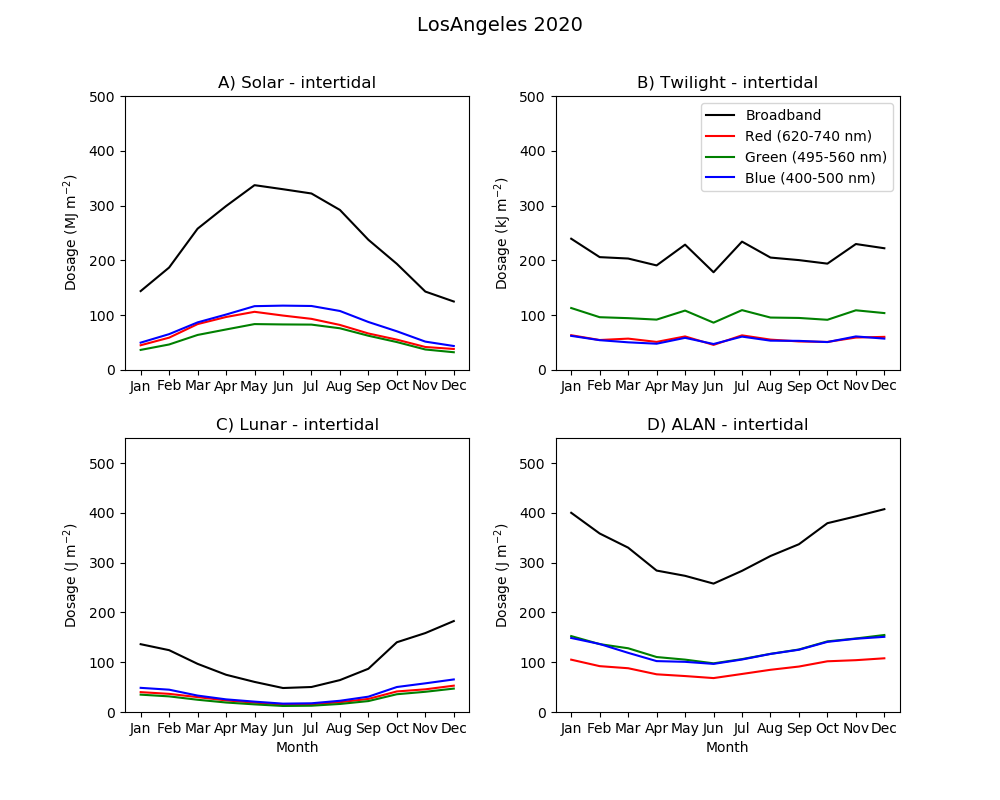


Figure S10: **Monthly integrated dosages of irradiance at the intertidal point calculated for Los Angeles (2020).** Model results for dosages of A) solar (MJ m–2), B) twilight (kJ m–2), C) lunar (J m–2) and D) artificial light at night (ALAN, J m–2); note the different units. Broadband (400–740 nm) is shown in black; spectral components, in blue (400–500 nm), green (495–560 nm) and red (620–740 nm).


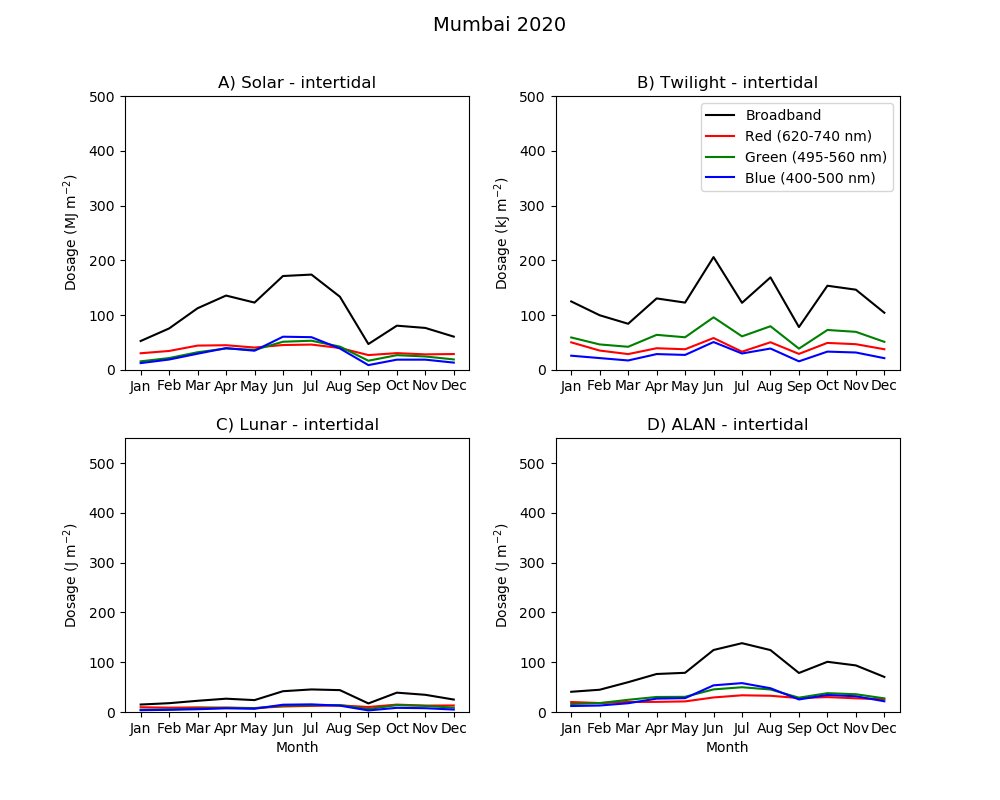


Figure S11: **Monthly integrated dosages of irradiance at the intertidal point calculated for Mumbai (2020).** Model results for dosages of A) solar (MJ m–2), B) twilight (kJ m–2), C) lunar (J m–2) and D) artificial light at night (ALAN, J m–2); note the different units. Broadband (400–740 nm) is shown in black; spectral components, in blue (400–500 nm), green (495–560 nm) and red (620–740 nm).


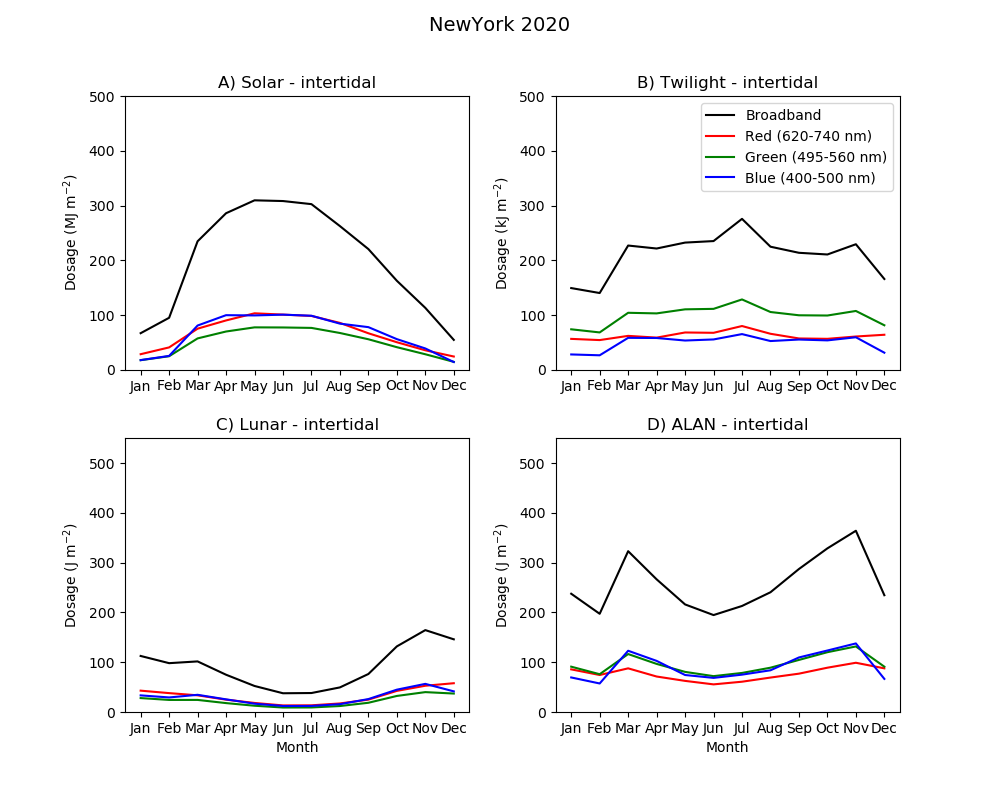


Figure S12: **Monthly integrated dosages of irradiance at the intertidal point calculated for New York (2020).** Model results for dosages of A) solar (MJ m–2), B) twilight (kJ m–2), C) lunar (J m–2) and D) artificial light at night (ALAN, J m–2); note the different units. Broadband (400–740 nm) is shown in black; spectral components, in blue (400–500 nm), green (495–560 nm) and red (620–740 nm).


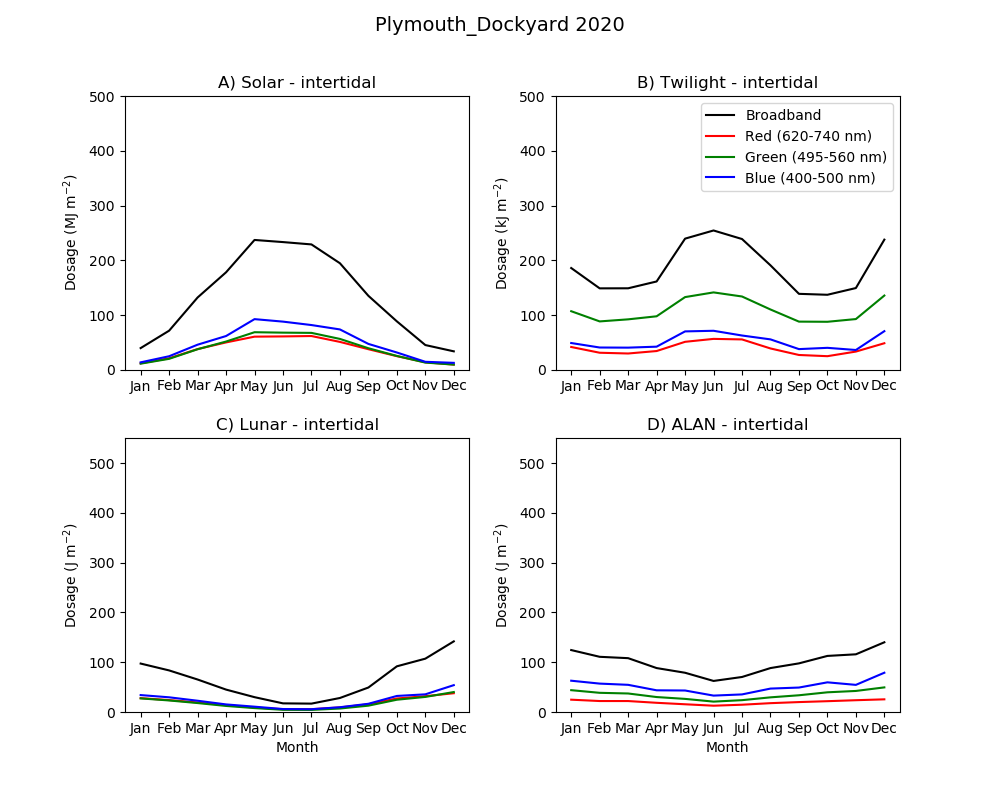


Figure S13: **Monthly integrated dosages of irradiance at the intertidal point calculated for Plymouth (2020).** Model results for dosages of A) solar (MJ m–2), B) twilight (kJ m–2), C) lunar (J m–2) and D) artificial light at night (ALAN, J m–2); note the different units. Broadband (400–740 nm) is shown in black; spectral components, in blue (400–500 nm), green (495–560 nm) and red (620–740 nm).


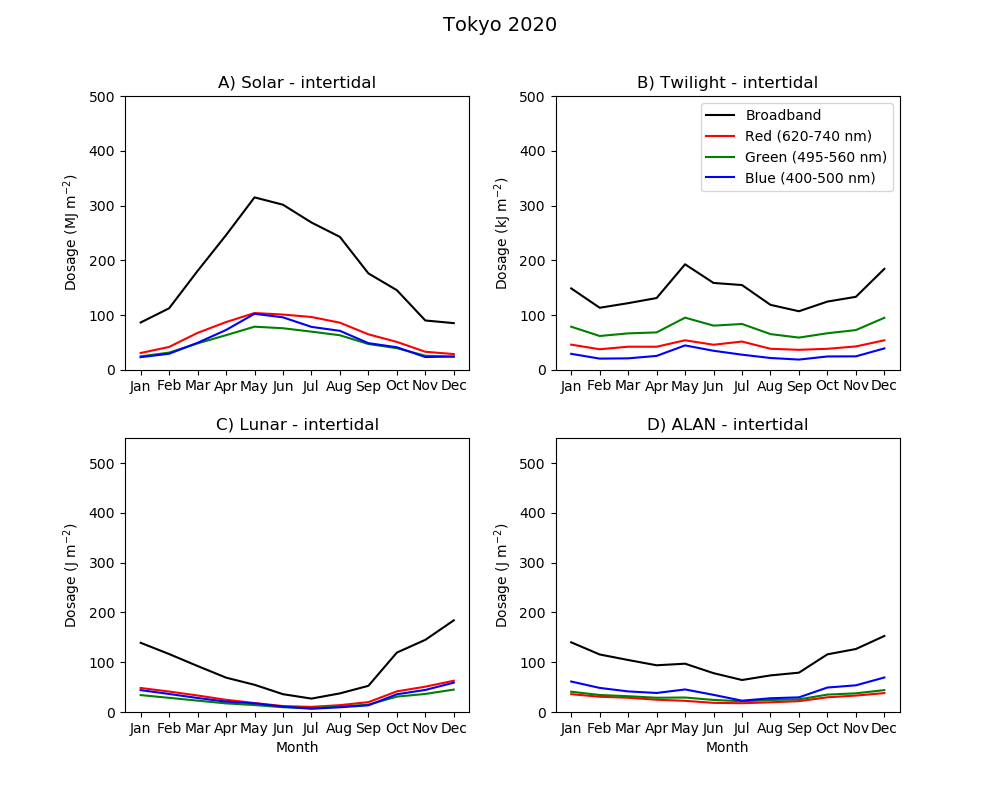


Figure S14: **Monthly integrated dosages of irradiance at the intertidal point calculated for Tokyo (2020).** Model results for dosages of A) solar (MJ m–2), B) twilight (kJ m–2), C) lunar (J m–2) and D) artificial light at night (ALAN, J m–2); note the different units. Broadband (400–740 nm) is shown in black; spectral components, in blue (400–500 nm), green (495–560 nm) and red (620–740 nm).
