# Supplementary material for: Disruption of marine habitats by artificial light at night from global coastal megacities
Source: Oxford University Press journal article supplement (doi:10.1525/elementa.2022.00042), 2022-01-01
Supplement: tides_megacities.xlsx [file tides_megacities.xlsx]

## Sheet: BuenosAires
Location: Buenos Aires
Source:
Date Time (GMT)	Height(m)
2021-10-01 01:00:00	-0.146
2021-10-01 02:00:00	-0.039
2021-10-01 03:00:00	0.088
2021-10-01 04:00:00	0.19
2021-10-01 05:00:00	0.234
2021-10-01 06:00:00	0.217
2021-10-01 07:00:00	0.156
2021-10-01 08:00:00	0.076
2021-10-01 09:00:00	-0.008
2021-10-01 10:00:00	-0.088
2021-10-01 11:00:00	-0.156
2021-10-01 12:00:00	-0.192
2021-10-01 13:00:00	-0.177
2021-10-01 14:00:00	-0.103
2021-10-01 15:00:00	0.006
2021-10-01 16:00:00	0.111
2021-10-01 17:00:00	0.172
2021-10-01 18:00:00	0.173
2021-10-01 19:00:00	0.124
2021-10-01 20:00:00	0.051
2021-10-01 21:00:00	-0.028
2021-10-01 22:00:00	-0.102
2021-10-01 23:00:00	-0.166
2021-10-02	-0.207
2021-10-02 01:00:00	-0.203
2021-10-02 02:00:00	-0.14
2021-10-02 03:00:00	-0.028
2021-10-02 04:00:00	0.098
2021-10-02 05:00:00	0.193
2021-10-02 06:00:00	0.23
2021-10-02 07:00:00	0.207
2021-10-02 08:00:00	0.145
2021-10-02 09:00:00	0.068
2021-10-02 10:00:00	-0.011
2021-10-02 11:00:00	-0.086
2021-10-02 12:00:00	-0.149
2021-10-02 13:00:00	-0.18
2021-10-02 14:00:00	-0.158
2021-10-02 15:00:00	-0.079
2021-10-02 16:00:00	0.031
2021-10-02 17:00:00	0.131
2021-10-02 18:00:00	0.182
2021-10-02 19:00:00	0.173
2021-10-02 20:00:00	0.116
2021-10-02 21:00:00	0.037
2021-10-02 22:00:00	-0.044
2021-10-02 23:00:00	-0.119
2021-10-03	-0.184
2021-10-03 01:00:00	-0.223
2021-10-03 02:00:00	-0.214
2021-10-03 03:00:00	-0.143
2021-10-03 04:00:00	-0.024
2021-10-03 05:00:00	0.106
2021-10-03 06:00:00	0.201
2021-10-03 07:00:00	0.235
2021-10-03 08:00:00	0.208
2021-10-03 09:00:00	0.145
2021-10-03 10:00:00	0.068
2021-10-03 11:00:00	-0.011
2021-10-03 12:00:00	-0.086
2021-10-03 13:00:00	-0.148
2021-10-03 14:00:00	-0.175
2021-10-03 15:00:00	-0.147
2021-10-03 16:00:00	-0.062
2021-10-03 17:00:00	0.054
2021-10-03 18:00:00	0.153
2021-10-03 19:00:00	0.198
2021-10-03 20:00:00	0.18
2021-10-03 21:00:00	0.113
2021-10-03 22:00:00	0.027
2021-10-03 23:00:00	-0.06
2021-10-04	-0.141
2021-10-04 01:00:00	-0.209
2021-10-04 02:00:00	-0.248
2021-10-04 03:00:00	-0.233
2021-10-04 04:00:00	-0.152
2021-10-04 05:00:00	-0.02
2021-10-04 06:00:00	0.118
2021-10-04 07:00:00	0.217
2021-10-04 08:00:00	0.249
2021-10-04 09:00:00	0.218
2021-10-04 10:00:00	0.15
2021-10-04 11:00:00	0.069
2021-10-04 12:00:00	-0.013
2021-10-04 13:00:00	-0.092
2021-10-04 14:00:00	-0.156
2021-10-04 15:00:00	-0.18
2021-10-04 16:00:00	-0.144
2021-10-04 17:00:00	-0.047
2021-10-04 18:00:00	0.077
2021-10-04 19:00:00	0.18
2021-10-04 20:00:00	0.221
2021-10-04 21:00:00	0.193
2021-10-04 22:00:00	0.116
2021-10-04 23:00:00	0.019
2021-10-05	-0.078
2021-10-05 01:00:00	-0.168
2021-10-05 02:00:00	-0.241
2021-10-05 03:00:00	-0.28
2021-10-05 04:00:00	-0.257
2021-10-05 05:00:00	-0.161
2021-10-05 06:00:00	-0.013
2021-10-05 07:00:00	0.138
2021-10-05 08:00:00	0.242
2021-10-05 09:00:00	0.271
2021-10-05 10:00:00	0.233
2021-10-05 11:00:00	0.156
2021-10-05 12:00:00	0.067
2021-10-05 13:00:00	-0.023
2021-10-05 14:00:00	-0.108
2021-10-05 15:00:00	-0.174
2021-10-05 16:00:00	-0.194
2021-10-05 17:00:00	-0.146
2021-10-05 18:00:00	-0.033
2021-10-05 19:00:00	0.105
2021-10-05 20:00:00	0.213
2021-10-05 21:00:00	0.251
2021-10-05 22:00:00	0.212
2021-10-05 23:00:00	0.121
2021-10-06	0.011
2021-10-06 01:00:00	-0.098
2021-10-06 02:00:00	-0.197
2021-10-06 03:00:00	-0.277
2021-10-06 04:00:00	-0.314
2021-10-06 05:00:00	-0.281
2021-10-06 06:00:00	-0.167
2021-10-06 07:00:00	0
2021-10-06 08:00:00	0.165
2021-10-06 09:00:00	0.271
2021-10-06 10:00:00	0.294
2021-10-06 11:00:00	0.245
2021-10-06 12:00:00	0.157
2021-10-06 13:00:00	0.057
2021-10-06 14:00:00	-0.043
2021-10-06 15:00:00	-0.135
2021-10-06 16:00:00	-0.202
2021-10-06 17:00:00	-0.214
2021-10-06 18:00:00	-0.148
2021-10-06 19:00:00	-0.015
2021-10-06 20:00:00	0.139
2021-10-06 21:00:00	0.253
2021-10-06 22:00:00	0.285
2021-10-06 23:00:00	0.233
2021-10-07	0.127
2021-10-07 01:00:00	0.003
2021-10-07 02:00:00	-0.118
2021-10-07 03:00:00	-0.228
2021-10-07 04:00:00	-0.313
2021-10-07 05:00:00	-0.347
2021-10-07 06:00:00	-0.299
2021-10-07 07:00:00	-0.165
2021-10-07 08:00:00	0.021
2021-10-07 09:00:00	0.195
2021-10-07 10:00:00	0.3
2021-10-07 11:00:00	0.311
2021-10-07 12:00:00	0.249
2021-10-07 13:00:00	0.147
2021-10-07 14:00:00	0.036
2021-10-07 15:00:00	-0.073
2021-10-07 16:00:00	-0.171
2021-10-07 17:00:00	-0.235
2021-10-07 18:00:00	-0.234
2021-10-07 19:00:00	-0.147
2021-10-07 20:00:00	0.009
2021-10-07 21:00:00	0.178
2021-10-07 22:00:00	0.295
2021-10-07 23:00:00	0.319
2021-10-08	0.253
2021-10-08 01:00:00	0.133
2021-10-08 02:00:00	-0.003
2021-10-08 03:00:00	-0.136
2021-10-08 04:00:00	-0.255
2021-10-08 05:00:00	-0.343
2021-10-08 06:00:00	-0.371
2021-10-08 07:00:00	-0.308
2021-10-08 08:00:00	-0.154
2021-10-08 09:00:00	0.047
2021-10-08 10:00:00	0.225
2021-10-08 11:00:00	0.321
2021-10-08 12:00:00	0.318
2021-10-08 13:00:00	0.24
2021-10-08 14:00:00	0.126
2021-10-08 15:00:00	0.005
2021-10-08 16:00:00	-0.11
2021-10-08 17:00:00	-0.21
2021-10-08 18:00:00	-0.268
2021-10-08 19:00:00	-0.25
2021-10-08 20:00:00	-0.139
2021-10-08 21:00:00	0.038
2021-10-08 22:00:00	0.219
2021-10-08 23:00:00	0.334
2021-10-09	0.348
2021-10-09 01:00:00	0.269
2021-10-09 02:00:00	0.138
2021-10-09 03:00:00	-0.009
2021-10-09 04:00:00	-0.149
2021-10-09 05:00:00	-0.274
2021-10-09 06:00:00	-0.364
2021-10-09 07:00:00	-0.383
2021-10-09 08:00:00	-0.304
2021-10-09 09:00:00	-0.135
2021-10-09 10:00:00	0.074
2021-10-09 11:00:00	0.248
2021-10-09 12:00:00	0.331
2021-10-09 13:00:00	0.311
2021-10-09 14:00:00	0.219
2021-10-09 15:00:00	0.096
2021-10-09 16:00:00	-0.031
2021-10-09 17:00:00	-0.15
2021-10-09 18:00:00	-0.248
2021-10-09 19:00:00	-0.295
2021-10-09 20:00:00	-0.257
2021-10-09 21:00:00	-0.125
2021-10-09 22:00:00	0.07
2021-10-09 23:00:00	0.256
2021-10-10	0.366
2021-10-10 01:00:00	0.367
2021-10-10 02:00:00	0.278
2021-10-10 03:00:00	0.139
2021-10-10 04:00:00	-0.012
2021-10-10 05:00:00	-0.157
2021-10-10 06:00:00	-0.285
2021-10-10 07:00:00	-0.371
2021-10-10 08:00:00	-0.381
2021-10-10 09:00:00	-0.289
2021-10-10 10:00:00	-0.109
2021-10-10 11:00:00	0.099
2021-10-10 12:00:00	0.262
2021-10-10 13:00:00	0.327
2021-10-10 14:00:00	0.291
2021-10-10 15:00:00	0.189
2021-10-10 16:00:00	0.061
2021-10-10 17:00:00	-0.067
2021-10-10 18:00:00	-0.185
2021-10-10 19:00:00	-0.277
2021-10-10 20:00:00	-0.311
2021-10-10 21:00:00	-0.255
2021-10-10 22:00:00	-0.105
2021-10-10 23:00:00	0.099
2021-10-11	0.284
2021-10-11 01:00:00	0.383
2021-10-11 02:00:00	0.373
2021-10-11 03:00:00	0.277
2021-10-11 04:00:00	0.137
2021-10-11 05:00:00	-0.014
2021-10-11 06:00:00	-0.158
2021-10-11 07:00:00	-0.284
2021-10-11 08:00:00	-0.365
2021-10-11 09:00:00	-0.365
2021-10-11 10:00:00	-0.263
2021-10-11 11:00:00	-0.081
2021-10-11 12:00:00	0.119
2021-10-11 13:00:00	0.265
2021-10-11 14:00:00	0.311
2021-10-11 15:00:00	0.262
2021-10-11 16:00:00	0.155
2021-10-11 17:00:00	0.027
2021-10-11 18:00:00	-0.098
2021-10-11 19:00:00	-0.212
2021-10-11 20:00:00	-0.295
2021-10-11 21:00:00	-0.317
2021-10-11 22:00:00	-0.246
2021-10-11 23:00:00	-0.084
2021-10-12	0.121
2021-10-12 01:00:00	0.297
2021-10-12 02:00:00	0.384
2021-10-12 03:00:00	0.366
2021-10-12 04:00:00	0.268
2021-10-12 05:00:00	0.132
2021-10-12 06:00:00	-0.012
2021-10-12 07:00:00	-0.151
2021-10-12 08:00:00	-0.271
2021-10-12 09:00:00	-0.345
2021-10-12 10:00:00	-0.337
2021-10-12 11:00:00	-0.231
2021-10-12 12:00:00	-0.053
2021-10-12 13:00:00	0.132
2021-10-12 14:00:00	0.258
2021-10-12 15:00:00	0.287
2021-10-12 16:00:00	0.23
2021-10-12 17:00:00	0.122
2021-10-12 18:00:00	0
2021-10-12 19:00:00	-0.12
2021-10-12 20:00:00	-0.227
2021-10-12 21:00:00	-0.302
2021-10-12 22:00:00	-0.313
2021-10-12 23:00:00	-0.232
2021-10-13	-0.068
2021-10-13 01:00:00	0.131
2021-10-13 02:00:00	0.294
2021-10-13 03:00:00	0.369
2021-10-13 04:00:00	0.346
2021-10-13 05:00:00	0.253
2021-10-13 06:00:00	0.127
2021-10-13 07:00:00	-0.007
2021-10-13 08:00:00	-0.137
2021-10-13 09:00:00	-0.249
2021-10-13 10:00:00	-0.315
2021-10-13 11:00:00	-0.301
2021-10-13 12:00:00	-0.195
2021-10-13 13:00:00	-0.028
2021-10-13 14:00:00	0.139
2021-10-13 15:00:00	0.245
2021-10-13 16:00:00	0.261
2021-10-13 17:00:00	0.199
2021-10-13 18:00:00	0.095
2021-10-13 19:00:00	-0.02
2021-10-13 20:00:00	-0.132
2021-10-13 21:00:00	-0.232
2021-10-13 22:00:00	-0.3
2021-10-13 23:00:00	-0.303
2021-10-14	-0.219
2021-10-14 01:00:00	-0.058
2021-10-14 02:00:00	0.129
2021-10-14 03:00:00	0.278
2021-10-14 04:00:00	0.343
2021-10-14 05:00:00	0.32
2021-10-14 06:00:00	0.235
2021-10-14 07:00:00	0.122
2021-10-14 08:00:00	0.001
2021-10-14 09:00:00	-0.119
2021-10-14 10:00:00	-0.222
2021-10-14 11:00:00	-0.28
2021-10-14 12:00:00	-0.263
2021-10-14 13:00:00	-0.162
2021-10-14 14:00:00	-0.008
2021-10-14 15:00:00	0.141
2021-10-14 16:00:00	0.229
2021-10-14 17:00:00	0.235
2021-10-14 18:00:00	0.173
2021-10-14 19:00:00	0.076
2021-10-14 20:00:00	-0.031
2021-10-14 21:00:00	-0.136
2021-10-14 22:00:00	-0.231
2021-10-14 23:00:00	-0.293
2021-10-15	-0.292
2021-10-15 01:00:00	-0.208
2021-10-15 02:00:00	-0.056
2021-10-15 03:00:00	0.118
2021-10-15 04:00:00	0.254
2021-10-15 05:00:00	0.313
2021-10-15 06:00:00	0.293
2021-10-15 07:00:00	0.219
2021-10-15 08:00:00	0.119
2021-10-15 09:00:00	0.011
2021-10-15 10:00:00	-0.098
2021-10-15 11:00:00	-0.193
2021-10-15 12:00:00	-0.246
2021-10-15 13:00:00	-0.227
2021-10-15 14:00:00	-0.132
2021-10-15 15:00:00	0.008
2021-10-15 16:00:00	0.14
2021-10-15 17:00:00	0.215
2021-10-15 18:00:00	0.215
2021-10-15 19:00:00	0.155
2021-10-15 20:00:00	0.064
2021-10-15 21:00:00	-0.036
2021-10-15 22:00:00	-0.136
2021-10-15 23:00:00	-0.226
2021-10-16	-0.285
2021-10-16 01:00:00	-0.282
2021-10-16 02:00:00	-0.202
2021-10-16 03:00:00	-0.057
2021-10-16 04:00:00	0.105
2021-10-16 05:00:00	0.23
2021-10-16 06:00:00	0.285
2021-10-16 07:00:00	0.269
2021-10-16 08:00:00	0.205
2021-10-16 09:00:00	0.117
2021-10-16 10:00:00	0.019
2021-10-16 11:00:00	-0.081
2021-10-16 12:00:00	-0.17
2021-10-16 13:00:00	-0.217
2021-10-16 14:00:00	-0.198
2021-10-16 15:00:00	-0.108
2021-10-16 16:00:00	0.021
2021-10-16 17:00:00	0.14
2021-10-16 18:00:00	0.205
2021-10-16 19:00:00	0.201
2021-10-16 20:00:00	0.143
2021-10-16 21:00:00	0.056
2021-10-16 22:00:00	-0.04
2021-10-16 23:00:00	-0.136
2021-10-17	-0.223
2021-10-17 01:00:00	-0.28
2021-10-17 02:00:00	-0.276
2021-10-17 03:00:00	-0.197
2021-10-17 04:00:00	-0.059
2021-10-17 05:00:00	0.095
2021-10-17 06:00:00	0.213
2021-10-17 07:00:00	0.265
2021-10-17 08:00:00	0.252
2021-10-17 09:00:00	0.195
2021-10-17 10:00:00	0.114
2021-10-17 11:00:00	0.023
2021-10-17 12:00:00	-0.073
2021-10-17 13:00:00	-0.156
2021-10-17 14:00:00	-0.199
2021-10-17 15:00:00	-0.177
2021-10-17 16:00:00	-0.089
2021-10-17 17:00:00	0.034
2021-10-17 18:00:00	0.145
2021-10-17 19:00:00	0.202
2021-10-17 20:00:00	0.194
2021-10-17 21:00:00	0.136
2021-10-17 22:00:00	0.051
2021-10-17 23:00:00	-0.044
2021-10-18	-0.139
2021-10-18 01:00:00	-0.225
2021-10-18 02:00:00	-0.279
2021-10-18 03:00:00	-0.272
2021-10-18 04:00:00	-0.191
2021-10-18 05:00:00	-0.055
2021-10-18 06:00:00	0.094
2021-10-18 07:00:00	0.206
2021-10-18 08:00:00	0.254
2021-10-18 09:00:00	0.24
2021-10-18 10:00:00	0.184
2021-10-18 11:00:00	0.107
2021-10-18 12:00:00	0.017
2021-10-18 13:00:00	-0.075
2021-10-18 14:00:00	-0.154
2021-10-18 15:00:00	-0.191
2021-10-18 16:00:00	-0.163
2021-10-18 17:00:00	-0.071
2021-10-18 18:00:00	0.051
2021-10-18 19:00:00	0.156
2021-10-18 20:00:00	0.207
2021-10-18 21:00:00	0.193
2021-10-18 22:00:00	0.132
2021-10-18 23:00:00	0.045
2021-10-19	-0.051
2021-10-19 01:00:00	-0.148
2021-10-19 02:00:00	-0.233
2021-10-19 03:00:00	-0.282
2021-10-19 04:00:00	-0.267
2021-10-19 05:00:00	-0.18
2021-10-19 06:00:00	-0.041
2021-10-19 07:00:00	0.104
2021-10-19 08:00:00	0.21
2021-10-19 09:00:00	0.25
2021-10-19 10:00:00	0.23
2021-10-19 11:00:00	0.171
2021-10-19 12:00:00	0.091
2021-10-19 13:00:00	0
2021-10-19 14:00:00	-0.091
2021-10-19 15:00:00	-0.164
2021-10-19 16:00:00	-0.191
2021-10-19 17:00:00	-0.151
2021-10-19 18:00:00	-0.051
2021-10-19 19:00:00	0.074
2021-10-19 20:00:00	0.175
2021-10-19 21:00:00	0.218
2021-10-19 22:00:00	0.196
2021-10-19 23:00:00	0.128
2021-10-20	0.036
2021-10-20 01:00:00	-0.064
2021-10-20 02:00:00	-0.163
2021-10-20 03:00:00	-0.245
2021-10-20 04:00:00	-0.286
2021-10-20 05:00:00	-0.26
2021-10-20 06:00:00	-0.162
2021-10-20 07:00:00	-0.018
2021-10-20 08:00:00	0.125
2021-10-20 09:00:00	0.22
2021-10-20 10:00:00	0.249
2021-10-20 11:00:00	0.218
2021-10-20 12:00:00	0.15
2021-10-20 13:00:00	0.065
2021-10-20 14:00:00	-0.028
2021-10-20 15:00:00	-0.118
2021-10-20 16:00:00	-0.182
2021-10-20 17:00:00	-0.194
2021-10-20 18:00:00	-0.137
2021-10-20 19:00:00	-0.023
2021-10-20 20:00:00	0.106
2021-10-20 21:00:00	0.201
2021-10-20 22:00:00	0.233
2021-10-20 23:00:00	0.199
2021-10-21	0.122
2021-10-21 01:00:00	0.023
2021-10-21 02:00:00	-0.082
2021-10-21 03:00:00	-0.182
2021-10-21 04:00:00	-0.26
2021-10-21 05:00:00	-0.289
2021-10-21 06:00:00	-0.247
2021-10-21 07:00:00	-0.135
2021-10-21 08:00:00	0.014
2021-10-21 09:00:00	0.151
2021-10-21 10:00:00	0.232
2021-10-21 11:00:00	0.244
2021-10-21 12:00:00	0.199
2021-10-21 13:00:00	0.121
2021-10-21 14:00:00	0.029
2021-10-21 15:00:00	-0.066
2021-10-21 16:00:00	-0.151
2021-10-21 17:00:00	-0.203
2021-10-21 18:00:00	-0.194
2021-10-21 19:00:00	-0.115
2021-10-21 20:00:00	0.013
2021-10-21 21:00:00	0.144
2021-10-21 22:00:00	0.23
2021-10-21 23:00:00	0.247
2021-10-22	0.2
2021-10-22 01:00:00	0.111
2021-10-22 02:00:00	0.005
2021-10-22 03:00:00	-0.104
2021-10-22 04:00:00	-0.204
2021-10-22 05:00:00	-0.274
2021-10-22 06:00:00	-0.287
2021-10-22 07:00:00	-0.226
2021-10-22 08:00:00	-0.1
2021-10-22 09:00:00	0.052
2021-10-22 10:00:00	0.177
2021-10-22 11:00:00	0.239
2021-10-22 12:00:00	0.231
2021-10-22 13:00:00	0.171
2021-10-22 14:00:00	0.084
2021-10-22 15:00:00	-0.013
2021-10-22 16:00:00	-0.108
2021-10-22 17:00:00	-0.185
2021-10-22 18:00:00	-0.219
2021-10-22 19:00:00	-0.186
2021-10-22 20:00:00	-0.084
2021-10-22 21:00:00	0.056
2021-10-22 22:00:00	0.185
2021-10-22 23:00:00	0.258
2021-10-23	0.257
2021-10-23 01:00:00	0.194
2021-10-23 02:00:00	0.096
2021-10-23 03:00:00	-0.016
2021-10-23 04:00:00	-0.128
2021-10-23 05:00:00	-0.225
2021-10-23 06:00:00	-0.283
2021-10-23 07:00:00	-0.278
2021-10-23 08:00:00	-0.197
2021-10-23 09:00:00	-0.059
2021-10-23 10:00:00	0.09
2021-10-23 11:00:00	0.199
2021-10-23 12:00:00	0.238
2021-10-23 13:00:00	0.21
2021-10-23 14:00:00	0.136
2021-10-23 15:00:00	0.042
2021-10-23 16:00:00	-0.057
2021-10-23 17:00:00	-0.148
2021-10-23 18:00:00	-0.213
2021-10-23 19:00:00	-0.225
2021-10-23 20:00:00	-0.167
2021-10-23 21:00:00	-0.045
2021-10-23 22:00:00	0.102
2021-10-23 23:00:00	0.223
2021-10-24	0.277
2021-10-24 01:00:00	0.257
2021-10-24 02:00:00	0.18
2021-10-24 03:00:00	0.074
2021-10-24 04:00:00	-0.04
2021-10-24 05:00:00	-0.151
2021-10-24 06:00:00	-0.241
2021-10-24 07:00:00	-0.285
2021-10-24 08:00:00	-0.259
2021-10-24 09:00:00	-0.159
2021-10-24 10:00:00	-0.015
2021-10-24 11:00:00	0.124
2021-10-24 12:00:00	0.212
2021-10-24 13:00:00	0.227
2021-10-24 14:00:00	0.18
2021-10-24 15:00:00	0.097
2021-10-24 16:00:00	0
2021-10-24 17:00:00	-0.097
2021-10-24 18:00:00	-0.181
2021-10-24 19:00:00	-0.23
2021-10-24 20:00:00	-0.22
2021-10-24 21:00:00	-0.137
2021-10-24 22:00:00	0
2021-10-24 23:00:00	0.146
2021-10-25	0.251
2021-10-25 01:00:00	0.284
2021-10-25 02:00:00	0.245
2021-10-25 03:00:00	0.158
2021-10-25 04:00:00	0.049
2021-10-25 05:00:00	-0.064
2021-10-25 06:00:00	-0.17
2021-10-25 07:00:00	-0.249
2021-10-25 08:00:00	-0.275
2021-10-25 09:00:00	-0.229
2021-10-25 10:00:00	-0.116
2021-10-25 11:00:00	0.029
2021-10-25 12:00:00	0.153
2021-10-25 13:00:00	0.216
2021-10-25 14:00:00	0.207
2021-10-25 15:00:00	0.146
2021-10-25 16:00:00	0.057
2021-10-25 17:00:00	-0.038
2021-10-25 18:00:00	-0.13
2021-10-25 19:00:00	-0.203
2021-10-25 20:00:00	-0.236
2021-10-25 21:00:00	-0.203
2021-10-25 22:00:00	-0.102
2021-10-25 23:00:00	0.043
2021-10-26	0.181
2021-10-26 01:00:00	0.266
2021-10-26 02:00:00	0.276
2021-10-26 03:00:00	0.222
2021-10-26 04:00:00	0.13
2021-10-26 05:00:00	0.022
2021-10-26 06:00:00	-0.085
2021-10-26 07:00:00	-0.182
2021-10-26 08:00:00	-0.247
2021-10-26 09:00:00	-0.255
2021-10-26 10:00:00	-0.191
2021-10-26 11:00:00	-0.069
2021-10-26 12:00:00	0.069
2021-10-26 13:00:00	0.173
2021-10-26 14:00:00	0.211
2021-10-26 15:00:00	0.182
2021-10-26 16:00:00	0.11
2021-10-26 17:00:00	0.02
2021-10-26 18:00:00	-0.071
2021-10-26 19:00:00	-0.155
2021-10-26 20:00:00	-0.216
2021-10-26 21:00:00	-0.231
2021-10-26 22:00:00	-0.18
2021-10-26 23:00:00	-0.064
2021-10-27	0.08
2021-10-27 01:00:00	0.205
2021-10-27 02:00:00	0.268
2021-10-27 03:00:00	0.258
2021-10-27 04:00:00	0.192
2021-10-27 05:00:00	0.099
2021-10-27 06:00:00	-0.002
2021-10-27 07:00:00	-0.101
2021-10-27 08:00:00	-0.186
2021-10-27 09:00:00	-0.236
2021-10-27 10:00:00	-0.226
2021-10-27 11:00:00	-0.148
2021-10-27 12:00:00	-0.022
2021-10-27 13:00:00	0.104
2021-10-27 14:00:00	0.186
2021-10-27 15:00:00	0.199
2021-10-27 16:00:00	0.154
2021-10-27 17:00:00	0.075
2021-10-27 18:00:00	-0.012
2021-10-27 19:00:00	-0.097
2021-10-27 20:00:00	-0.172
2021-10-27 21:00:00	-0.221
2021-10-27 22:00:00	-0.22
2021-10-27 23:00:00	-0.154
2021-10-28	-0.031
2021-10-28 01:00:00	0.109
2021-10-28 02:00:00	0.217
2021-10-28 03:00:00	0.258
2021-10-28 04:00:00	0.233
2021-10-28 05:00:00	0.161
2021-10-28 06:00:00	0.071
2021-10-28 07:00:00	-0.021
2021-10-28 08:00:00	-0.11
2021-10-28 09:00:00	-0.182
2021-10-28 10:00:00	-0.217
2021-10-28 11:00:00	-0.191
2021-10-28 12:00:00	-0.103
2021-10-28 13:00:00	0.021
2021-10-28 14:00:00	0.133
2021-10-28 15:00:00	0.192
2021-10-28 16:00:00	0.184
2021-10-28 17:00:00	0.126
2021-10-28 18:00:00	0.044
2021-10-28 19:00:00	-0.04
2021-10-28 20:00:00	-0.119
2021-10-28 21:00:00	-0.185
2021-10-28 22:00:00	-0.223
2021-10-28 23:00:00	-0.209
2021-10-29	-0.13
2021-10-29 01:00:00	-0.004
2021-10-29 02:00:00	0.129
2021-10-29 03:00:00	0.22
2021-10-29 04:00:00	0.245
2021-10-29 05:00:00	0.208
2021-10-29 06:00:00	0.135
2021-10-29 07:00:00	0.05
2021-10-29 08:00:00	-0.034
2021-10-29 09:00:00	-0.112
2021-10-29 10:00:00	-0.173
2021-10-29 11:00:00	-0.194
2021-10-29 12:00:00	-0.156
2021-10-29 13:00:00	-0.062
2021-10-29 14:00:00	0.057
2021-10-29 15:00:00	0.155
2021-10-29 16:00:00	0.194
2021-10-29 17:00:00	0.17
2021-10-29 18:00:00	0.102
2021-10-29 19:00:00	0.018
2021-10-29 20:00:00	-0.064
2021-10-29 21:00:00	-0.138
2021-10-29 22:00:00	-0.198
2021-10-29 23:00:00	-0.226
2021-10-30	-0.201
2021-10-30 01:00:00	-0.113
2021-10-30 02:00:00	0.016
2021-10-30 03:00:00	0.142
2021-10-30 04:00:00	0.222
2021-10-30 05:00:00	0.234
2021-10-30 06:00:00	0.19
2021-10-30 07:00:00	0.117
2021-10-30 08:00:00	0.037
2021-10-30 09:00:00	-0.04
2021-10-30 10:00:00	-0.111
2021-10-30 11:00:00	-0.163
2021-10-30 12:00:00	-0.174
2021-10-30 13:00:00	-0.127
2021-10-30 14:00:00	-0.028
2021-10-30 15:00:00	0.087
2021-10-30 16:00:00	0.173
2021-10-30 17:00:00	0.197
2021-10-30 18:00:00	0.159
2021-10-30 19:00:00	0.082
2021-10-30 20:00:00	-0.004
2021-10-30 21:00:00	-0.086
2021-10-30 22:00:00	-0.158
2021-10-30 23:00:00	-0.214
2021-10-31	-0.235
2021-10-31 01:00:00	-0.199
2021-10-31 02:00:00	-0.103
2021-10-31 03:00:00	0.03
2021-10-31 04:00:00	0.154
2021-10-31 05:00:00	0.227
2021-10-31 06:00:00	0.232
2021-10-31 07:00:00	0.183
2021-10-31 08:00:00	0.109
2021-10-31 09:00:00	0.03
2021-10-31 10:00:00	-0.044
2021-10-31 11:00:00	-0.111
2021-10-31 12:00:00	-0.157
2021-10-31 13:00:00	-0.161
2021-10-31 14:00:00	-0.106
2021-10-31 15:00:00	-0.002
2021-10-31 16:00:00	0.112
2021-10-31 17:00:00	0.19
2021-10-31 18:00:00	0.203
2021-10-31 19:00:00	0.154
2021-10-31 20:00:00	0.07
2021-10-31 21:00:00	-0.022
2021-10-31 22:00:00	-0.107
2021-10-31 23:00:00	-0.181
2021-11-01	-0.235
2021-11-01 01:00:00	-0.25
2021-11-01 02:00:00	-0.205
2021-11-01 03:00:00	-0.098
2021-11-01 04:00:00	0.042
2021-11-01 05:00:00	0.168
2021-11-01 06:00:00	0.238
2021-11-01 07:00:00	0.238
2021-11-01 08:00:00	0.185
2021-11-01 09:00:00	0.107
2021-11-01 10:00:00	0.027
2021-11-01 11:00:00	-0.05
2021-11-01 12:00:00	-0.117
2021-11-01 13:00:00	-0.161
2021-11-01 14:00:00	-0.158
2021-11-01 15:00:00	-0.095
2021-11-01 16:00:00	0.017
2021-11-01 17:00:00	0.134
2021-11-01 18:00:00	0.21
2021-11-01 19:00:00	0.216
2021-11-01 20:00:00	0.158
2021-11-01 21:00:00	0.065
2021-11-01 22:00:00	-0.035
2021-11-01 23:00:00	-0.127
2021-11-02	-0.205
2021-11-02 01:00:00	-0.26
2021-11-02 02:00:00	-0.271
2021-11-02 03:00:00	-0.217
2021-11-02 04:00:00	-0.098
2021-11-02 05:00:00	0.054
2021-11-02 06:00:00	0.186
2021-11-02 07:00:00	0.257
2021-11-02 08:00:00	0.252
2021-11-02 09:00:00	0.192
2021-11-02 10:00:00	0.108
2021-11-02 11:00:00	0.021
2021-11-02 12:00:00	-0.062
2021-11-02 13:00:00	-0.133
2021-11-02 14:00:00	-0.176
2021-11-02 15:00:00	-0.167
2021-11-02 16:00:00	-0.091
2021-11-02 17:00:00	0.032
2021-11-02 18:00:00	0.159
2021-11-02 19:00:00	0.237
2021-11-02 20:00:00	0.238
2021-11-02 21:00:00	0.171
2021-11-02 22:00:00	0.067
2021-11-02 23:00:00	-0.043
2021-11-03	-0.145
2021-11-03 01:00:00	-0.231
2021-11-03 02:00:00	-0.29
2021-11-03 03:00:00	-0.297
2021-11-03 04:00:00	-0.233
2021-11-03 05:00:00	-0.098
2021-11-03 06:00:00	0.068
2021-11-03 07:00:00	0.209
2021-11-03 08:00:00	0.28
2021-11-03 09:00:00	0.269
2021-11-03 10:00:00	0.2
2021-11-03 11:00:00	0.105
2021-11-03 12:00:00	0.008
2021-11-03 13:00:00	-0.083
2021-11-03 14:00:00	-0.159
2021-11-03 15:00:00	-0.202
2021-11-03 16:00:00	-0.183
2021-11-03 17:00:00	-0.093
2021-11-03 18:00:00	0.049
2021-11-03 19:00:00	0.188
2021-11-03 20:00:00	0.271
2021-11-03 21:00:00	0.268
2021-11-03 22:00:00	0.192
2021-11-03 23:00:00	0.076
2021-11-04	-0.047
2021-11-04 01:00:00	-0.16
2021-11-04 02:00:00	-0.257
2021-11-04 03:00:00	-0.32
2021-11-04 04:00:00	-0.325
2021-11-04 05:00:00	-0.248
2021-11-04 06:00:00	-0.097
2021-11-04 07:00:00	0.084
2021-11-04 08:00:00	0.233
2021-11-04 09:00:00	0.302
2021-11-04 10:00:00	0.283
2021-11-04 11:00:00	0.202
2021-11-04 12:00:00	0.096
2021-11-04 13:00:00	-0.013
2021-11-04 14:00:00	-0.113
2021-11-04 15:00:00	-0.195
2021-11-04 16:00:00	-0.235
2021-11-04 17:00:00	-0.204
2021-11-04 18:00:00	-0.093
2021-11-04 19:00:00	0.069
2021-11-04 20:00:00	0.223
2021-11-04 21:00:00	0.31
2021-11-04 22:00:00	0.303
2021-11-04 23:00:00	0.216
2021-11-05	0.088

## Sheet: Eilat
Location: Eilat
Source:
Date Time (GMT)	Height(m)
2019-01-01 00:10:00	0.286
2019-01-01 00:20:00	0.315
2019-01-01 00:30:00	0.342
2019-01-01 00:40:00	0.371
2019-01-01 00:50:00	0.392
2019-01-01 01:00:00	0.42
2019-01-01 01:10:00	0.45
2019-01-01 01:20:00	0.479
2019-01-01 01:30:00	0.501
2019-01-01 01:40:00	0.523
2019-01-01 01:50:00	0.542
2019-01-01 02:00:00	0.563
2019-01-01 02:10:00	0.579
2019-01-01 02:20:00	0.598
2019-01-01 02:30:00	0.608
2019-01-01 02:40:00	0.613
2019-01-01 02:50:00	0.62
2019-01-01 03:00:00	0.624
2019-01-01 03:10:00	0.63
2019-01-01 03:20:00	0.63
2019-01-01 03:30:00	0.631
2019-01-01 03:40:00	0.619
2019-01-01 03:50:00	0.612
2019-01-01 04:00:00	0.602
2019-01-01 04:10:00	0.589
2019-01-01 04:20:00	0.579
2019-01-01 04:30:00	0.565
2019-01-01 04:40:00	0.542
2019-01-01 04:50:00	0.52
2019-01-01 05:00:00	0.499
2019-01-01 05:10:00	0.478
2019-01-01 05:20:00	0.459
2019-01-01 05:30:00	0.44
2019-01-01 05:40:00	0.413
2019-01-01 05:50:00	0.383
2019-01-01 06:00:00	0.357
2019-01-01 06:10:00	0.328
2019-01-01 06:20:00	0.308
2019-01-01 06:30:00	0.283
2019-01-01 06:40:00	0.252
2019-01-01 06:50:00	0.223
2019-01-01 07:00:00	0.192
2019-01-01 07:10:00	0.171
2019-01-01 07:20:00	0.145
2019-01-01 07:30:00	0.126
2019-01-01 07:40:00	0.096
2019-01-01 07:50:00	0.078
2019-01-01 08:00:00	0.061
2019-01-01 08:10:00	0.053
2019-01-01 08:20:00	0.041
2019-01-01 08:30:00	0.037
2019-01-01 08:40:00	0.016
2019-01-01 08:50:00	0.011
2019-01-01 09:00:00	0.009
2019-01-01 09:10:00	0.015
2019-01-01 09:20:00	0.027
2019-01-01 09:30:00	0.035
2019-01-01 09:40:00	0.039
2019-01-01 09:50:00	0.043
2019-01-01 10:00:00	0.059
2019-01-01 10:10:00	0.076
2019-01-01 10:20:00	0.098
2019-01-01 10:30:00	0.112
2019-01-01 10:40:00	0.131
2019-01-01 10:50:00	0.135
2019-01-01 11:00:00	0.159
2019-01-01 11:10:00	0.172
2019-01-01 11:20:00	0.199
2019-01-01 11:30:00	0.222
2019-01-01 11:40:00	0.247
2019-01-01 11:50:00	0.263
2019-01-01 12:00:00	0.283
2019-01-01 12:10:00	0.31
2019-01-01 12:20:00	0.34
2019-01-01 12:30:00	0.375
2019-01-01 12:40:00	0.402
2019-01-01 12:50:00	0.424
2019-01-01 13:00:00	0.438
2019-01-01 13:10:00	0.472
2019-01-01 13:20:00	0.496
2019-01-01 13:30:00	0.534
2019-01-01 13:40:00	0.559
2019-01-01 13:50:00	0.572
2019-01-01 14:00:00	0.584
2019-01-01 14:10:00	0.606
2019-01-01 14:20:00	0.624
2019-01-01 14:30:00	0.646
2019-01-01 14:40:00	0.66
2019-01-01 14:50:00	0.66
2019-01-01 15:00:00	0.658
2019-01-01 15:10:00	0.658
2019-01-01 15:20:00	0.665
2019-01-01 15:30:00	0.673
2019-01-01 15:40:00	0.676
2019-01-01 15:50:00	0.663
2019-01-01 16:00:00	0.648
2019-01-01 16:10:00	0.637
2019-01-01 16:20:00	0.627
2019-01-01 16:30:00	0.622
2019-01-01 16:40:00	0.624
2019-01-01 16:50:00	0.602
2019-01-01 17:00:00	0.583
2019-01-01 17:10:00	0.558
2019-01-01 17:20:00	0.539
2019-01-01 17:30:00	0.522
2019-01-01 17:40:00	0.507
2019-01-01 17:50:00	0.488
2019-01-01 18:00:00	0.453
2019-01-01 18:10:00	0.427
2019-01-01 18:20:00	0.396
2019-01-01 18:30:00	0.369
2019-01-01 18:40:00	0.354
2019-01-01 18:50:00	0.329
2019-01-01 19:00:00	0.295
2019-01-01 19:10:00	0.266
2019-01-01 19:20:00	0.238
2019-01-01 19:30:00	0.21
2019-01-01 19:40:00	0.195
2019-01-01 19:50:00	0.172
2019-01-01 20:00:00	0.147
2019-01-01 20:10:00	0.115
2019-01-01 20:20:00	0.095
2019-01-01 20:30:00	0.066
2019-01-01 20:40:00	0.062
2019-01-01 20:50:00	0.042
2019-01-01 21:00:00	0.026
2019-01-01 21:10:00	0.005
2019-01-01 21:20:00	-0.009
2019-01-01 21:30:00	-0.023
2019-01-01 21:40:00	-0.014
2019-01-01 21:50:00	-0.022
2019-01-01 22:00:00	-0.033
2019-01-01 22:10:00	-0.027
2019-01-01 22:20:00	-0.033
2019-01-01 22:30:00	-0.03
2019-01-01 22:40:00	-0.021
2019-01-01 22:50:00	-0.004
2019-01-01 23:00:00	0.003
2019-01-01 23:10:00	0.022
2019-01-01 23:20:00	0.026
2019-01-01 23:30:00	0.047
2019-01-01 23:40:00	0.07
2019-01-01 23:50:00	0.091
2019-01-02	0.119
2019-01-02 00:10:00	0.144
2019-01-02 00:20:00	0.166
2019-01-02 00:30:00	0.188
2019-01-02 00:40:00	0.222
2019-01-02 00:50:00	0.25
2019-01-02 01:00:00	0.283
2019-01-02 01:10:00	0.318
2019-01-02 01:20:00	0.342
2019-01-02 01:30:00	0.369
2019-01-02 01:40:00	0.399
2019-01-02 01:50:00	0.433
2019-01-02 02:00:00	0.465
2019-01-02 02:10:00	0.499
2019-01-02 02:20:00	0.523
2019-01-02 02:30:00	0.544
2019-01-02 02:40:00	0.569
2019-01-02 02:50:00	0.593
2019-01-02 03:00:00	0.613
2019-01-02 03:10:00	0.632
2019-01-02 03:20:00	0.645
2019-01-02 03:30:00	0.648
2019-01-02 03:40:00	0.658
2019-01-02 03:50:00	0.666
2019-01-02 04:00:00	0.664
2019-01-02 04:10:00	0.665
2019-01-02 04:20:00	0.666
2019-01-02 04:30:00	0.651
2019-01-02 04:40:00	0.649
2019-01-02 04:50:00	0.64
2019-01-02 05:00:00	0.631
2019-01-02 05:10:00	0.619
2019-01-02 05:20:00	0.604
2019-01-02 05:30:00	0.582
2019-01-02 05:40:00	0.564
2019-01-02 05:50:00	0.552
2019-01-02 06:00:00	0.526
2019-01-02 06:10:00	0.506
2019-01-02 06:20:00	0.483
2019-01-02 06:30:00	0.456
2019-01-02 06:40:00	0.422
2019-01-02 06:50:00	0.408
2019-01-02 07:00:00	0.373
2019-01-02 07:10:00	0.346
2019-01-02 07:20:00	0.33
2019-01-02 07:30:00	0.292
2019-01-02 07:40:00	0.271
2019-01-02 07:50:00	0.241
2019-01-02 08:00:00	0.228
2019-01-02 08:10:00	0.187
2019-01-02 08:20:00	0.189
2019-01-02 08:30:00	0.16
2019-01-02 08:40:00	0.152
2019-01-02 08:50:00	0.125
2019-01-02 09:00:00	0.122
2019-01-02 09:10:00	0.094
2019-01-02 09:20:00	0.107
2019-01-02 09:30:00	0.092
2019-01-02 09:40:00	0.088
2019-01-02 09:50:00	0.078
2019-01-02 10:00:00	0.071
2019-01-02 10:10:00	0.088
2019-01-02 10:20:00	0.07
2019-01-02 10:30:00	0.086
2019-01-02 10:40:00	0.077
2019-01-02 10:50:00	0.09
2019-01-02 11:00:00	0.093
2019-01-02 11:10:00	0.114
2019-01-02 11:20:00	0.126
2019-01-02 11:30:00	0.143
2019-01-02 11:40:00	0.138
2019-01-02 11:50:00	0.171
2019-01-02 12:00:00	0.185
2019-01-02 12:10:00	0.204
2019-01-02 12:20:00	0.232
2019-01-02 12:30:00	0.247
2019-01-02 12:40:00	0.269
2019-01-02 12:50:00	0.277
2019-01-02 13:00:00	0.327
2019-01-02 13:10:00	0.339
2019-01-02 13:20:00	0.38
2019-01-02 13:30:00	0.391
2019-01-02 13:40:00	0.426
2019-01-02 13:50:00	0.439
2019-01-02 14:00:00	0.473
2019-01-02 14:10:00	0.495
2019-01-02 14:20:00	0.524
2019-01-02 14:30:00	0.546
2019-01-02 14:40:00	0.569
2019-01-02 14:50:00	0.594
2019-01-02 15:00:00	0.608
2019-01-02 15:10:00	0.632
2019-01-02 15:20:00	0.641
2019-01-02 15:30:00	0.663
2019-01-02 15:40:00	0.666
2019-01-02 15:50:00	0.684
2019-01-02 16:00:00	0.685
2019-01-02 16:10:00	0.699
2019-01-02 16:20:00	0.692
2019-01-02 16:30:00	0.697
2019-01-02 16:40:00	0.69
2019-01-02 16:50:00	0.682
2019-01-02 17:00:00	0.679
2019-01-02 17:10:00	0.67
2019-01-02 17:20:00	0.666
2019-01-02 17:30:00	0.651
2019-01-02 17:40:00	0.638
2019-01-02 17:50:00	0.615
2019-01-02 18:00:00	0.604
2019-01-02 18:10:00	0.578
2019-01-02 18:20:00	0.562
2019-01-02 18:30:00	0.541
2019-01-02 18:40:00	0.519
2019-01-02 18:50:00	0.491
2019-01-02 19:00:00	0.471
2019-01-02 19:10:00	0.444
2019-01-02 19:20:00	0.417
2019-01-02 19:30:00	0.396
2019-01-02 19:40:00	0.365
2019-01-02 19:50:00	0.34
2019-01-02 20:00:00	0.316
2019-01-02 20:10:00	0.294
2019-01-02 20:20:00	0.264
2019-01-02 20:30:00	0.24
2019-01-02 20:40:00	0.211
2019-01-02 20:50:00	0.186
2019-01-02 21:00:00	0.167
2019-01-02 21:10:00	0.144
2019-01-02 21:20:00	0.126
2019-01-02 21:30:00	0.108
2019-01-02 21:40:00	0.088
2019-01-02 21:50:00	0.07
2019-01-02 22:00:00	0.06
2019-01-02 22:10:00	0.045
2019-01-02 22:20:00	0.036
2019-01-02 22:30:00	0.027
2019-01-02 22:40:00	0.02
2019-01-02 22:50:00	0.016
2019-01-02 23:00:00	0.017
2019-01-02 23:10:00	0.013
2019-01-02 23:20:00	0.018
2019-01-02 23:30:00	0.027
2019-01-02 23:40:00	0.032
2019-01-02 23:50:00	0.048
2019-01-03	0.062
2019-01-03 00:10:00	0.075
2019-01-03 00:20:00	0.091
2019-01-03 00:30:00	0.116
2019-01-03 00:40:00	0.134
2019-01-03 00:50:00	0.161
2019-01-03 01:00:00	0.182
2019-01-03 01:10:00	0.208
2019-01-03 01:20:00	0.232
2019-01-03 01:30:00	0.261
2019-01-03 01:40:00	0.29
2019-01-03 01:50:00	0.32
2019-01-03 02:00:00	0.351
2019-01-03 02:10:00	0.375
2019-01-03 02:20:00	0.406
2019-01-03 02:30:00	0.436
2019-01-03 02:40:00	0.465
2019-01-03 02:50:00	0.493
2019-01-03 03:00:00	0.523
2019-01-03 03:10:00	0.537
2019-01-03 03:20:00	0.559
2019-01-03 03:30:00	0.58
2019-01-03 03:40:00	0.605
2019-01-03 03:50:00	0.626
2019-01-03 04:00:00	0.642
2019-01-03 04:10:00	0.65
2019-01-03 04:20:00	0.66
2019-01-03 04:30:00	0.67
2019-01-03 04:40:00	0.674
2019-01-03 04:50:00	0.684
2019-01-03 05:00:00	0.68
2019-01-03 05:10:00	0.676
2019-01-03 05:20:00	0.665
2019-01-03 05:30:00	0.663
2019-01-03 05:40:00	0.653
2019-01-03 05:50:00	0.651
2019-01-03 06:00:00	0.634
2019-01-03 06:10:00	0.615
2019-01-03 06:20:00	0.597
2019-01-03 06:30:00	0.577
2019-01-03 06:40:00	0.562
2019-01-03 06:50:00	0.543
2019-01-03 07:00:00	0.523
2019-01-03 07:10:00	0.495
2019-01-03 07:20:00	0.47
2019-01-03 07:30:00	0.44
2019-01-03 07:40:00	0.42
2019-01-03 07:50:00	0.395
2019-01-03 08:00:00	0.373
2019-01-03 08:10:00	0.345
2019-01-03 08:20:00	0.323
2019-01-03 08:30:00	0.291
2019-01-03 08:40:00	0.267
2019-01-03 08:50:00	0.245
2019-01-03 09:00:00	0.222
2019-01-03 09:10:00	0.203
2019-01-03 09:20:00	0.181
2019-01-03 09:30:00	0.162
2019-01-03 09:40:00	0.141
2019-01-03 09:50:00	0.132
2019-01-03 10:00:00	0.117
2019-01-03 10:10:00	0.111
2019-01-03 10:20:00	0.1
2019-01-03 10:30:00	0.092
2019-01-03 10:40:00	0.085
2019-01-03 10:50:00	0.085
2019-01-03 11:00:00	0.084
2019-01-03 11:10:00	0.085
2019-01-03 11:20:00	0.085
2019-01-03 11:30:00	0.081
2019-01-03 11:40:00	0.087
2019-01-03 11:50:00	0.094
2019-01-03 12:00:00	0.108
2019-01-03 12:10:00	0.117
2019-01-03 12:20:00	0.135
2019-01-03 12:30:00	0.142
2019-01-03 12:40:00	0.16
2019-01-03 12:50:00	0.177
2019-01-03 13:00:00	0.199
2019-01-03 13:10:00	0.223
2019-01-03 13:20:00	0.249
2019-01-03 13:30:00	0.27
2019-01-03 13:40:00	0.291
2019-01-03 13:50:00	0.318
2019-01-03 14:00:00	0.34
2019-01-03 14:10:00	0.374
2019-01-03 14:20:00	0.402
2019-01-03 14:30:00	0.431
2019-01-03 14:40:00	0.453
2019-01-03 14:50:00	0.482
2019-01-03 15:00:00	0.503
2019-01-03 15:10:00	0.531
2019-01-03 15:20:00	0.557
2019-01-03 15:30:00	0.578
2019-01-03 15:40:00	0.597
2019-01-03 15:50:00	0.617
2019-01-03 16:00:00	0.633
2019-01-03 16:10:00	0.647
2019-01-03 16:20:00	0.668
2019-01-03 16:30:00	0.678
2019-01-03 16:40:00	0.686
2019-01-03 16:50:00	0.687
2019-01-03 17:00:00	0.689
2019-01-03 17:10:00	0.689
2019-01-03 17:20:00	0.696
2019-01-03 17:30:00	0.695
2019-01-03 17:40:00	0.687
2019-01-03 17:50:00	0.677
2019-01-03 18:00:00	0.664
2019-01-03 18:10:00	0.654
2019-01-03 18:20:00	0.642
2019-01-03 18:30:00	0.629
2019-01-03 18:40:00	0.61
2019-01-03 18:50:00	0.596
2019-01-03 19:00:00	0.568
2019-01-03 19:10:00	0.552
2019-01-03 19:20:00	0.532
2019-01-03 19:30:00	0.506
2019-01-03 19:40:00	0.479
2019-01-03 19:50:00	0.452
2019-01-03 20:00:00	0.416
2019-01-03 20:10:00	0.391
2019-01-03 20:20:00	0.366
2019-01-03 20:30:00	0.334
2019-01-03 20:40:00	0.303
2019-01-03 20:50:00	0.268
2019-01-03 21:00:00	0.237
2019-01-03 21:10:00	0.209
2019-01-03 21:20:00	0.187
2019-01-03 21:30:00	0.156
2019-01-03 21:40:00	0.132
2019-01-03 21:50:00	0.104
2019-01-03 22:00:00	0.08
2019-01-03 22:10:00	0.071
2019-01-03 22:20:00	0.054
2019-01-03 22:30:00	0.038
2019-01-03 22:40:00	0.024
2019-01-03 22:50:00	0.005
2019-01-03 23:00:00	-0.008
2019-01-03 23:10:00	-0.004
2019-01-03 23:20:00	-0.012
2019-01-03 23:30:00	-0.008
2019-01-03 23:40:00	-0.009
2019-01-03 23:50:00	-0.011
2019-01-04	-0.014
2019-01-04 00:10:00	0.002
2019-01-04 00:20:00	0.017
2019-01-04 00:30:00	0.03
2019-01-04 00:40:00	0.047
2019-01-04 00:50:00	0.058
2019-01-04 01:00:00	0.075
2019-01-04 01:10:00	0.093
2019-01-04 01:20:00	0.116
2019-01-04 01:30:00	0.135
2019-01-04 01:40:00	0.166
2019-01-04 01:50:00	0.188
2019-01-04 02:00:00	0.213
2019-01-04 02:10:00	0.239
2019-01-04 02:20:00	0.274
2019-01-04 02:30:00	0.302
2019-01-04 02:40:00	0.334
2019-01-04 02:50:00	0.367
2019-01-04 03:00:00	0.39
2019-01-04 03:10:00	0.425
2019-01-04 03:20:00	0.453
2019-01-04 03:30:00	0.485
2019-01-04 03:40:00	0.511
2019-01-04 03:50:00	0.539
2019-01-04 04:00:00	0.56
2019-01-04 04:10:00	0.588
2019-01-04 04:20:00	0.608
2019-01-04 04:30:00	0.624
2019-01-04 04:40:00	0.64
2019-01-04 04:50:00	0.654
2019-01-04 05:00:00	0.661
2019-01-04 05:10:00	0.672
2019-01-04 05:20:00	0.684
2019-01-04 05:30:00	0.682
2019-01-04 05:40:00	0.687
2019-01-04 05:50:00	0.691
2019-01-04 06:00:00	0.685
2019-01-04 06:10:00	0.681
2019-01-04 06:20:00	0.68
2019-01-04 06:30:00	0.663
2019-01-04 06:40:00	0.651
2019-01-04 06:50:00	0.635
2019-01-04 07:00:00	0.614
2019-01-04 07:10:00	0.597
2019-01-04 07:20:00	0.587
2019-01-04 07:30:00	0.556
2019-01-04 07:40:00	0.538
2019-01-04 07:50:00	0.514
2019-01-04 08:00:00	0.478
2019-01-04 08:10:00	0.457
2019-01-04 08:20:00	0.436
2019-01-04 08:30:00	0.402
2019-01-04 08:40:00	0.379
2019-01-04 08:50:00	0.359
2019-01-04 09:00:00	0.32
2019-01-04 09:10:00	0.302
2019-01-04 09:20:00	0.273
2019-01-04 09:30:00	0.244
2019-01-04 09:40:00	0.219
2019-01-04 09:50:00	0.209
2019-01-04 10:00:00	0.178
2019-01-04 10:10:00	0.164
2019-01-04 10:20:00	0.149
2019-01-04 10:30:00	0.132
2019-01-04 10:40:00	0.125
2019-01-04 10:50:00	0.109
2019-01-04 11:00:00	0.092
2019-01-04 11:10:00	0.088
2019-01-04 11:20:00	0.084
2019-01-04 11:30:00	0.08
2019-01-04 11:40:00	0.086
2019-01-04 11:50:00	0.079
2019-01-04 12:00:00	0.074
2019-01-04 12:10:00	0.073
2019-01-04 12:20:00	0.086
2019-01-04 12:30:00	0.094
2019-01-04 12:40:00	0.108
2019-01-04 12:50:00	0.118
2019-01-04 13:00:00	0.12
2019-01-04 13:10:00	0.126
2019-01-04 13:20:00	0.144
2019-01-04 13:30:00	0.169
2019-01-04 13:40:00	0.198
2019-01-04 13:50:00	0.224
2019-01-04 14:00:00	0.233
2019-01-04 14:10:00	0.25
2019-01-04 14:20:00	0.269
2019-01-04 14:30:00	0.299
2019-01-04 14:40:00	0.334
2019-01-04 14:50:00	0.364
2019-01-04 15:00:00	0.388
2019-01-04 15:10:00	0.412
2019-01-04 15:20:00	0.436
2019-01-04 15:30:00	0.461
2019-01-04 15:40:00	0.505
2019-01-04 15:50:00	0.528
2019-01-04 16:00:00	0.542
2019-01-04 16:10:00	0.559
2019-01-04 16:20:00	0.578
2019-01-04 16:30:00	0.59
2019-01-04 16:40:00	0.619
2019-01-04 16:50:00	0.645
2019-01-04 17:00:00	0.643
2019-01-04 17:10:00	0.651
2019-01-04 17:20:00	0.65
2019-01-04 17:30:00	0.669
2019-01-04 17:40:00	0.677
2019-01-04 17:50:00	0.69
2019-01-04 18:00:00	0.677
2019-01-04 18:10:00	0.671
2019-01-04 18:20:00	0.64
2019-01-04 18:30:00	0.633
2019-01-04 18:40:00	0.644
2019-01-04 18:50:00	0.646
2019-01-04 19:00:00	0.625
2019-01-04 19:10:00	0.601
2019-01-04 19:20:00	0.566
2019-01-04 19:30:00	0.539
2019-01-04 19:40:00	0.547
2019-01-04 19:50:00	0.565
2019-01-04 20:00:00	0.536
2019-01-04 20:10:00	0.49
2019-01-04 20:20:00	0.442
2019-01-04 20:30:00	0.398
2019-01-04 20:40:00	0.387
2019-01-04 20:50:00	0.38
2019-01-04 21:00:00	0.367
2019-01-04 21:10:00	0.322
2019-01-04 21:20:00	0.258
2019-01-04 21:30:00	0.225
2019-01-04 21:40:00	0.204
2019-01-04 21:50:00	0.204
2019-01-04 22:00:00	0.189
2019-01-04 22:10:00	0.158
2019-01-04 22:20:00	0.122
2019-01-04 22:30:00	0.066
2019-01-04 22:40:00	0.049
2019-01-04 22:50:00	0.06
2019-01-04 23:00:00	0.062
2019-01-04 23:10:00	0.045
2019-01-04 23:20:00	0.013
2019-01-04 23:30:00	-0.023
2019-01-04 23:40:00	-0.015
2019-01-04 23:50:00	-0.011
2019-01-05	0.009
2019-01-05 00:10:00	0.011
2019-01-05 00:20:00	-0.003
2019-01-05 00:30:00	-0.023
2019-01-05 00:40:00	-0.012
2019-01-05 00:50:00	0.018
2019-01-05 01:00:00	0.043
2019-01-05 01:10:00	0.06
2019-01-05 01:20:00	0.064
2019-01-05 01:30:00	0.06
2019-01-05 01:40:00	0.057
2019-01-05 01:50:00	0.102
2019-01-05 02:00:00	0.134
2019-01-05 02:10:00	0.171
2019-01-05 02:20:00	0.173
2019-01-05 02:30:00	0.18
2019-01-05 02:40:00	0.198
2019-01-05 02:50:00	0.24
2019-01-05 03:00:00	0.269
2019-01-05 03:10:00	0.332
2019-01-05 03:20:00	0.331
2019-01-05 03:30:00	0.349
2019-01-05 03:40:00	0.363
2019-01-05 03:50:00	0.402
2019-01-05 04:00:00	0.432
2019-01-05 04:10:00	0.478
2019-01-05 04:20:00	0.514
2019-01-05 04:30:00	0.512
2019-01-05 04:40:00	0.527
2019-01-05 04:50:00	0.549
2019-01-05 05:00:00	0.578
2019-01-05 05:10:00	0.605
2019-01-05 05:20:00	0.63
2019-01-05 05:30:00	0.623
2019-01-05 05:40:00	0.631
2019-01-05 05:50:00	0.631
2019-01-05 06:00:00	0.652
2019-01-05 06:10:00	0.674
2019-01-05 06:20:00	0.677
2019-01-05 06:30:00	0.667
2019-01-05 06:40:00	0.649
2019-01-05 06:50:00	0.648
2019-01-05 07:00:00	0.64
2019-01-05 07:10:00	0.651
2019-01-05 07:20:00	0.646
2019-01-05 07:30:00	0.622
2019-01-05 07:40:00	0.592
2019-01-05 07:50:00	0.572
2019-01-05 08:00:00	0.551
2019-01-05 08:10:00	0.546
2019-01-05 08:20:00	0.531
2019-01-05 08:30:00	0.499
2019-01-05 08:40:00	0.466
2019-01-05 08:50:00	0.432
2019-01-05 09:00:00	0.414
2019-01-05 09:10:00	0.403
2019-01-05 09:20:00	0.386
2019-01-05 09:30:00	0.354
2019-01-05 09:40:00	0.323
2019-01-05 09:50:00	0.29
2019-01-05 10:00:00	0.271
2019-01-05 10:10:00	0.259
2019-01-05 10:20:00	0.239
2019-01-05 10:30:00	0.21
2019-01-05 10:40:00	0.189
2019-01-05 10:50:00	0.163
2019-01-05 11:00:00	0.145
2019-01-05 11:10:00	0.142
2019-01-05 11:20:00	0.13
2019-01-05 11:30:00	0.114
2019-01-05 11:40:00	0.091
2019-01-05 11:50:00	0.076
2019-01-05 12:00:00	0.067
2019-01-05 12:10:00	0.075
2019-01-05 12:20:00	0.073
2019-01-05 12:30:00	0.075
2019-01-05 12:40:00	0.066
2019-01-05 12:50:00	0.063
2019-01-05 13:00:00	0.065
2019-01-05 13:10:00	0.085
2019-01-05 13:20:00	0.096
2019-01-05 13:30:00	0.108
2019-01-05 13:40:00	0.121
2019-01-05 13:50:00	0.127
2019-01-05 14:00:00	0.142
2019-01-05 14:10:00	0.169
2019-01-05 14:20:00	0.191
2019-01-05 14:30:00	0.217
2019-01-05 14:40:00	0.241
2019-01-05 14:50:00	0.254
2019-01-05 15:00:00	0.282
2019-01-05 15:10:00	0.309
2019-01-05 15:20:00	0.342
2019-01-05 15:30:00	0.369
2019-01-05 15:40:00	0.398
2019-01-05 15:50:00	0.415
2019-01-05 16:00:00	0.439
2019-01-05 16:10:00	0.466
2019-01-05 16:20:00	0.49
2019-01-05 16:30:00	0.515
2019-01-05 16:40:00	0.54
2019-01-05 16:50:00	0.554
2019-01-05 17:00:00	0.566
2019-01-05 17:10:00	0.589
2019-01-05 17:20:00	0.6
2019-01-05 17:30:00	0.618
2019-01-05 17:40:00	0.63
2019-01-05 17:50:00	0.634
2019-01-05 18:00:00	0.639
2019-01-05 18:10:00	0.645
2019-01-05 18:20:00	0.647
2019-01-05 18:30:00	0.652
2019-01-05 18:40:00	0.653
2019-01-05 18:50:00	0.648
2019-01-05 19:00:00	0.636
2019-01-05 19:10:00	0.627
2019-01-05 19:20:00	0.615
2019-01-05 19:30:00	0.604
2019-01-05 19:40:00	0.592
2019-01-05 19:50:00	0.578
2019-01-05 20:00:00	0.56
2019-01-05 20:10:00	0.533
2019-01-05 20:20:00	0.512
2019-01-05 20:30:00	0.488
2019-01-05 20:40:00	0.464
2019-01-05 20:50:00	0.442
2019-01-05 21:00:00	0.414
2019-01-05 21:10:00	0.383
2019-01-05 21:20:00	0.353
2019-01-05 21:30:00	0.33
2019-01-05 21:40:00	0.299
2019-01-05 21:50:00	0.276
2019-01-05 22:00:00	0.244
2019-01-05 22:10:00	0.218
2019-01-05 22:20:00	0.191
2019-01-05 22:30:00	0.17
2019-01-05 22:40:00	0.143
2019-01-05 22:50:00	0.122
2019-01-05 23:00:00	0.101
2019-01-05 23:10:00	0.078
2019-01-05 23:20:00	0.059
2019-01-05 23:30:00	0.05
2019-01-05 23:40:00	0.034
2019-01-05 23:50:00	0.025
2019-01-06	0.017
2019-01-06 00:10:00	0.006
2019-01-06 00:20:00	0.004
2019-01-06 00:30:00	0.001
2019-01-06 00:40:00	0.009
2019-01-06 00:50:00	0
2019-01-06 01:00:00	0.01
2019-01-06 01:10:00	0.016
2019-01-06 01:20:00	0.024
2019-01-06 01:30:00	0.034
2019-01-06 01:40:00	0.051
2019-01-06 01:50:00	0.054
2019-01-06 02:00:00	0.079
2019-01-06 02:10:00	0.096
2019-01-06 02:20:00	0.101
2019-01-06 02:30:00	0.126
2019-01-06 02:40:00	0.144
2019-01-06 02:50:00	0.173
2019-01-06 03:00:00	0.188
2019-01-06 03:10:00	0.226
2019-01-06 03:20:00	0.235
2019-01-06 03:30:00	0.276
2019-01-06 03:40:00	0.3
2019-01-06 03:50:00	0.325
2019-01-06 04:00:00	0.348
2019-01-06 04:10:00	0.391
2019-01-06 04:20:00	0.407
2019-01-06 04:30:00	0.434
2019-01-06 04:40:00	0.47
2019-01-06 04:50:00	0.484
2019-01-06 05:00:00	0.51
2019-01-06 05:10:00	0.532
2019-01-06 05:20:00	0.557
2019-01-06 05:30:00	0.566
2019-01-06 05:40:00	0.594
2019-01-06 05:50:00	0.605
2019-01-06 06:00:00	0.617
2019-01-06 06:10:00	0.633
2019-01-06 06:20:00	0.639
2019-01-06 06:30:00	0.648
2019-01-06 06:40:00	0.654
2019-01-06 06:50:00	0.654
2019-01-06 07:00:00	0.653
2019-01-06 07:10:00	0.657
2019-01-06 07:20:00	0.648
2019-01-06 07:30:00	0.645
2019-01-06 07:40:00	0.635
2019-01-06 07:50:00	0.621
2019-01-06 08:00:00	0.6
2019-01-06 08:10:00	0.592
2019-01-06 08:20:00	0.573
2019-01-06 08:30:00	0.551
2019-01-06 08:40:00	0.535
2019-01-06 08:50:00	0.51
2019-01-06 09:00:00	0.481
2019-01-06 09:10:00	0.461
2019-01-06 09:20:00	0.437
2019-01-06 09:30:00	0.416
2019-01-06 09:40:00	0.396
2019-01-06 09:50:00	0.369
2019-01-06 10:00:00	0.338
2019-01-06 10:10:00	0.32
2019-01-06 10:20:00	0.294
2019-01-06 10:30:00	0.274
2019-01-06 10:40:00	0.255
2019-01-06 10:50:00	0.233
2019-01-06 11:00:00	0.209
2019-01-06 11:10:00	0.189
2019-01-06 11:20:00	0.173
2019-01-06 11:30:00	0.155
2019-01-06 11:40:00	0.146
2019-01-06 11:50:00	0.132
2019-01-06 12:00:00	0.118
2019-01-06 12:10:00	0.105
2019-01-06 12:20:00	0.098
2019-01-06 12:30:00	0.092
2019-01-06 12:40:00	0.092
2019-01-06 12:50:00	0.096
2019-01-06 13:00:00	0.091
2019-01-06 13:10:00	0.097
2019-01-06 13:20:00	0.097
2019-01-06 13:30:00	0.106
2019-01-06 13:40:00	0.115
2019-01-06 13:50:00	0.136
2019-01-06 14:00:00	0.139
2019-01-06 14:10:00	0.157
2019-01-06 14:20:00	0.169
2019-01-06 14:30:00	0.187
2019-01-06 14:40:00	0.207
2019-01-06 14:50:00	0.229
2019-01-06 15:00:00	0.246
2019-01-06 15:10:00	0.268
2019-01-06 15:20:00	0.288
2019-01-06 15:30:00	0.306
2019-01-06 15:40:00	0.337
2019-01-06 15:50:00	0.358
2019-01-06 16:00:00	0.381
2019-01-06 16:10:00	0.4
2019-01-06 16:20:00	0.423
2019-01-06 16:30:00	0.442
2019-01-06 16:40:00	0.474
2019-01-06 16:50:00	0.498
2019-01-06 17:00:00	0.52
2019-01-06 17:10:00	0.54
2019-01-06 17:20:00	0.554
2019-01-06 17:30:00	0.573
2019-01-06 17:40:00	0.593
2019-01-06 17:50:00	0.606
2019-01-06 18:00:00	0.621
2019-01-06 18:10:00	0.626
2019-01-06 18:20:00	0.63
2019-01-06 18:30:00	0.626
2019-01-06 18:40:00	0.634
2019-01-06 18:50:00	0.639
2019-01-06 19:00:00	0.64
2019-01-06 19:10:00	0.636
2019-01-06 19:20:00	0.626
2019-01-06 19:30:00	0.614
2019-01-06 19:40:00	0.61
2019-01-06 19:50:00	0.6
2019-01-06 20:00:00	0.59
2019-01-06 20:10:00	0.574
2019-01-06 20:20:00	0.553
2019-01-06 20:30:00	0.528
2019-01-06 20:40:00	0.51
2019-01-06 20:50:00	0.494
2019-01-06 21:00:00	0.474
2019-01-06 21:10:00	0.453
2019-01-06 21:20:00	0.424
2019-01-06 21:30:00	0.393
2019-01-06 21:40:00	0.369
2019-01-06 21:50:00	0.343
2019-01-06 22:00:00	0.32
2019-01-06 22:10:00	0.296
2019-01-06 22:20:00	0.269
2019-01-06 22:30:00	0.236
2019-01-06 22:40:00	0.214
2019-01-06 22:50:00	0.189
2019-01-06 23:00:00	0.166
2019-01-06 23:10:00	0.147
2019-01-06 23:20:00	0.123
2019-01-06 23:30:00	0.096
2019-01-06 23:40:00	0.081
2019-01-06 23:50:00	0.065
2019-01-07	0.049
2019-01-07 00:10:00	0.041
2019-01-07 00:20:00	0.028
2019-01-07 00:30:00	0.017
2019-01-07 00:40:00	0.013
2019-01-07 00:50:00	0.008
2019-01-07 01:00:00	0.004
2019-01-07 01:10:00	0.009
2019-01-07 01:20:00	0.007
2019-01-07 01:30:00	0.005
2019-01-07 01:40:00	0.008
2019-01-07 01:50:00	0.011
2019-01-07 02:00:00	0.017
2019-01-07 02:10:00	0.034
2019-01-07 02:20:00	0.044
2019-01-07 02:30:00	0.055
2019-01-07 02:40:00	0.071
2019-01-07 02:50:00	0.085
2019-01-07 03:00:00	0.104
2019-01-07 03:10:00	0.132
2019-01-07 03:20:00	0.158
2019-01-07 03:30:00	0.178
2019-01-07 03:40:00	0.206
2019-01-07 03:50:00	0.229
2019-01-07 04:00:00	0.256
2019-01-07 04:10:00	0.286
2019-01-07 04:20:00	0.316
2019-01-07 04:30:00	0.339
2019-01-07 04:40:00	0.366
2019-01-07 04:50:00	0.392
2019-01-07 05:00:00	0.416
2019-01-07 05:10:00	0.446
2019-01-07 05:20:00	0.472
2019-01-07 05:30:00	0.491
2019-01-07 05:40:00	0.521
2019-01-07 05:50:00	0.541
2019-01-07 06:00:00	0.563
2019-01-07 06:10:00	0.588
2019-01-07 06:20:00	0.606
2019-01-07 06:30:00	0.622
2019-01-07 06:40:00	0.634
2019-01-07 06:50:00	0.646
2019-01-07 07:00:00	0.652
2019-01-07 07:10:00	0.661
2019-01-07 07:20:00	0.663
2019-01-07 07:30:00	0.661
2019-01-07 07:40:00	0.659
2019-01-07 07:50:00	0.655
2019-01-07 08:00:00	0.642
2019-01-07 08:10:00	0.638
2019-01-07 08:20:00	0.622
2019-01-07 08:30:00	0.608
2019-01-07 08:40:00	0.595
2019-01-07 08:50:00	0.575
2019-01-07 09:00:00	0.558
2019-01-07 09:10:00	0.541
2019-01-07 09:20:00	0.523
2019-01-07 09:30:00	0.503
2019-01-07 09:40:00	0.482
2019-01-07 09:50:00	0.461
2019-01-07 10:00:00	0.433
2019-01-07 10:10:00	0.414
2019-01-07 10:20:00	0.393
2019-01-07 10:30:00	0.369
2019-01-07 10:40:00	0.343
2019-01-07 10:50:00	0.32
2019-01-07 11:00:00	0.293
2019-01-07 11:10:00	0.273
2019-01-07 11:20:00	0.254
2019-01-07 11:30:00	0.228
2019-01-07 11:40:00	0.211
2019-01-07 11:50:00	0.185
2019-01-07 12:00:00	0.168
2019-01-07 12:10:00	0.148
2019-01-07 12:20:00	0.142
2019-01-07 12:30:00	0.125
2019-01-07 12:40:00	0.117
2019-01-07 12:50:00	0.11
2019-01-07 13:00:00	0.099
2019-01-07 13:10:00	0.096
2019-01-07 13:20:00	0.099
2019-01-07 13:30:00	0.102
2019-01-07 13:40:00	0.107
2019-01-07 13:50:00	0.116
2019-01-07 14:00:00	0.12
2019-01-07 14:10:00	0.127
2019-01-07 14:20:00	0.137
2019-01-07 14:30:00	0.156
2019-01-07 14:40:00	0.168
2019-01-07 14:50:00	0.185
2019-01-07 15:00:00	0.208
2019-01-07 15:10:00	0.222
2019-01-07 15:20:00	0.241
2019-01-07 15:30:00	0.271
2019-01-07 15:40:00	0.296
2019-01-07 15:50:00	0.314
2019-01-07 16:00:00	0.337
2019-01-07 16:10:00	0.356
2019-01-07 16:20:00	0.378
2019-01-07 16:30:00	0.406
2019-01-07 16:40:00	0.436
2019-01-07 16:50:00	0.464
2019-01-07 17:00:00	0.484
2019-01-07 17:10:00	0.5
2019-01-07 17:20:00	0.523
2019-01-07 17:30:00	0.55
2019-01-07 17:40:00	0.567
2019-01-07 17:50:00	0.595
2019-01-07 18:00:00	0.616
2019-01-07 18:10:00	0.624
2019-01-07 18:20:00	0.634
2019-01-07 18:30:00	0.65
2019-01-07 18:40:00	0.66
2019-01-07 18:50:00	0.674
2019-01-07 19:00:00	0.679
2019-01-07 19:10:00	0.68
2019-01-07 19:20:00	0.674
2019-01-07 19:30:00	0.673
2019-01-07 19:40:00	0.668
2019-01-07 19:50:00	0.668
2019-01-07 20:00:00	0.664
2019-01-07 20:10:00	0.656
2019-01-07 20:20:00	0.645
2019-01-07 20:30:00	0.626
2019-01-07 20:40:00	0.616
2019-01-07 20:50:00	0.602
2019-01-07 21:00:00	0.59
2019-01-07 21:10:00	0.572
2019-01-07 21:20:00	0.553
2019-01-07 21:30:00	0.523
2019-01-07 21:40:00	0.508
2019-01-07 21:50:00	0.48
2019-01-07 22:00:00	0.464
2019-01-07 22:10:00	0.441
2019-01-07 22:20:00	0.414
2019-01-07 22:30:00	0.385
2019-01-07 22:40:00	0.353
2019-01-07 22:50:00	0.338
2019-01-07 23:00:00	0.309
2019-01-07 23:10:00	0.288
2019-01-07 23:20:00	0.257
2019-01-07 23:30:00	0.228
2019-01-07 23:40:00	0.201
2019-01-07 23:50:00	0.178
2019-01-08	0.163
2019-01-08 00:10:00	0.147
2019-01-08 00:20:00	0.123
2019-01-08 00:30:00	0.105
2019-01-08 00:40:00	0.092
2019-01-08 00:50:00	0.077
2019-01-08 01:00:00	0.078
2019-01-08 01:10:00	0.073
2019-01-08 01:20:00	0.07
2019-01-08 01:30:00	0.065
2019-01-08 01:40:00	0.069
2019-01-08 01:50:00	0.072
2019-01-08 02:00:00	0.076
2019-01-08 02:10:00	0.085
2019-01-08 02:20:00	0.092
2019-01-08 02:30:00	0.101
2019-01-08 02:40:00	0.111
2019-01-08 02:50:00	0.119
2019-01-08 03:00:00	0.137
2019-01-08 03:10:00	0.152
2019-01-08 03:20:00	0.164
2019-01-08 03:30:00	0.185
2019-01-08 03:40:00	0.202
2019-01-08 03:50:00	0.215
2019-01-08 04:00:00	0.236
2019-01-08 04:10:00	0.265
2019-01-08 04:20:00	0.29
2019-01-08 04:30:00	0.312
2019-01-08 04:40:00	0.342
2019-01-08 04:50:00	0.364
2019-01-08 05:00:00	0.392
2019-01-08 05:10:00	0.423
2019-01-08 05:20:00	0.454
2019-01-08 05:30:00	0.483
2019-01-08 05:40:00	0.509
2019-01-08 05:50:00	0.531
2019-01-08 06:00:00	0.558
2019-01-08 06:10:00	0.581
2019-01-08 06:20:00	0.601
2019-01-08 06:30:00	0.622
2019-01-08 06:40:00	0.643
2019-01-08 06:50:00	0.653
2019-01-08 07:00:00	0.664
2019-01-08 07:10:00	0.68
2019-01-08 07:20:00	0.688
2019-01-08 07:30:00	0.695
2019-01-08 07:40:00	0.703
2019-01-08 07:50:00	0.7
2019-01-08 08:00:00	0.697
2019-01-08 08:10:00	0.697
2019-01-08 08:20:00	0.692
2019-01-08 08:30:00	0.691
2019-01-08 08:40:00	0.683
2019-01-08 08:50:00	0.669
2019-01-08 09:00:00	0.656
2019-01-08 09:10:00	0.64
2019-01-08 09:20:00	0.624
2019-01-08 09:30:00	0.609
2019-01-08 09:40:00	0.592
2019-01-08 09:50:00	0.567
2019-01-08 10:00:00	0.544
2019-01-08 10:10:00	0.522
2019-01-08 10:20:00	0.498
2019-01-08 10:30:00	0.478
2019-01-08 10:40:00	0.457
2019-01-08 10:50:00	0.432
2019-01-08 11:00:00	0.407
2019-01-08 11:10:00	0.381
2019-01-08 11:20:00	0.359
2019-01-08 11:30:00	0.338
2019-01-08 11:40:00	0.316
2019-01-08 11:50:00	0.293
2019-01-08 12:00:00	0.266
2019-01-08 12:10:00	0.242
2019-01-08 12:20:00	0.218
2019-01-08 12:30:00	0.202
2019-01-08 12:40:00	0.187
2019-01-08 12:50:00	0.173
2019-01-08 13:00:00	0.159
2019-01-08 13:10:00	0.146
2019-01-08 13:20:00	0.132
2019-01-08 13:30:00	0.129
2019-01-08 13:40:00	0.129
2019-01-08 13:50:00	0.128
2019-01-08 14:00:00	0.129
2019-01-08 14:10:00	0.13
2019-01-08 14:20:00	0.131
2019-01-08 14:30:00	0.136
2019-01-08 14:40:00	0.15
2019-01-08 14:50:00	0.16
2019-01-08 15:00:00	0.175
2019-01-08 15:10:00	0.187
2019-01-08 15:20:00	0.196
2019-01-08 15:30:00	0.216
2019-01-08 15:40:00	0.234
2019-01-08 15:50:00	0.254
2019-01-08 16:00:00	0.278
2019-01-08 16:10:00	0.295
2019-01-08 16:20:00	0.312
2019-01-08 16:30:00	0.335
2019-01-08 16:40:00	0.358
2019-01-08 16:50:00	0.386
2019-01-08 17:00:00	0.412
2019-01-08 17:10:00	0.435
2019-01-08 17:20:00	0.456
2019-01-08 17:30:00	0.479
2019-01-08 17:40:00	0.501
2019-01-08 17:50:00	0.526
2019-01-08 18:00:00	0.553
2019-01-08 18:10:00	0.57
2019-01-08 18:20:00	0.589
2019-01-08 18:30:00	0.609
2019-01-08 18:40:00	0.629
2019-01-08 18:50:00	0.645
2019-01-08 19:00:00	0.661
2019-01-08 19:10:00	0.671
2019-01-08 19:20:00	0.678
2019-01-08 19:30:00	0.683
2019-01-08 19:40:00	0.688
2019-01-08 19:50:00	0.691
2019-01-08 20:00:00	0.692
2019-01-08 20:10:00	0.688
2019-01-08 20:20:00	0.682
2019-01-08 20:30:00	0.672
2019-01-08 20:40:00	0.657
2019-01-08 20:50:00	0.647
2019-01-08 21:00:00	0.632
2019-01-08 21:10:00	0.613
2019-01-08 21:20:00	0.593
2019-01-08 21:30:00	0.578
2019-01-08 21:40:00	0.55
2019-01-08 21:50:00	0.533
2019-01-08 22:00:00	0.513
2019-01-08 22:10:00	0.485
2019-01-08 22:20:00	0.462
2019-01-08 22:30:00	0.438
2019-01-08 22:40:00	0.412
2019-01-08 22:50:00	0.389
2019-01-08 23:00:00	0.367
2019-01-08 23:10:00	0.337
2019-01-08 23:20:00	0.311
2019-01-08 23:30:00	0.286
2019-01-08 23:40:00	0.258
2019-01-08 23:50:00	0.236
2019-01-09	0.217
2019-01-09 00:10:00	0.19
2019-01-09 00:20:00	0.169
2019-01-09 00:30:00	0.15
2019-01-09 00:40:00	0.128
2019-01-09 00:50:00	0.114
2019-01-09 01:00:00	0.095
2019-01-09 01:10:00	0.079
2019-01-09 01:20:00	0.065
2019-01-09 01:30:00	0.06
2019-01-09 01:40:00	0.053
2019-01-09 01:50:00	0.049
2019-01-09 02:00:00	0.041
2019-01-09 02:10:00	0.042
2019-01-09 02:20:00	0.035
2019-01-09 02:30:00	0.041
2019-01-09 02:40:00	0.05
2019-01-09 02:50:00	0.059
2019-01-09 03:00:00	0.07
2019-01-09 03:10:00	0.078
2019-01-09 03:20:00	0.092
2019-01-09 03:30:00	0.102
2019-01-09 03:40:00	0.117
2019-01-09 03:50:00	0.14
2019-01-09 04:00:00	0.162
2019-01-09 04:10:00	0.174
2019-01-09 04:20:00	0.198
2019-01-09 04:30:00	0.212
2019-01-09 04:40:00	0.236
2019-01-09 04:50:00	0.261
2019-01-09 05:00:00	0.288
2019-01-09 05:10:00	0.31
2019-01-09 05:20:00	0.331
2019-01-09 05:30:00	0.353
2019-01-09 05:40:00	0.38
2019-01-09 05:50:00	0.407
2019-01-09 06:00:00	0.432
2019-01-09 06:10:00	0.457
2019-01-09 06:20:00	0.476
2019-01-09 06:30:00	0.491
2019-01-09 06:40:00	0.514
2019-01-09 06:50:00	0.54
2019-01-09 07:00:00	0.562
2019-01-09 07:10:00	0.58
2019-01-09 07:20:00	0.591
2019-01-09 07:30:00	0.598
2019-01-09 07:40:00	0.61
2019-01-09 07:50:00	0.625
2019-01-09 08:00:00	0.636
2019-01-09 08:10:00	0.643
2019-01-09 08:20:00	0.644
2019-01-09 08:30:00	0.638
2019-01-09 08:40:00	0.633
2019-01-09 08:50:00	0.635
2019-01-09 09:00:00	0.631
2019-01-09 09:10:00	0.623
2019-01-09 09:20:00	0.609
2019-01-09 09:30:00	0.585
2019-01-09 09:40:00	0.576
2019-01-09 09:50:00	0.559
2019-01-09 10:00:00	0.547
2019-01-09 10:10:00	0.53
2019-01-09 10:20:00	0.5
2019-01-09 10:30:00	0.479
2019-01-09 10:40:00	0.455
2019-01-09 10:50:00	0.431
2019-01-09 11:00:00	0.416
2019-01-09 11:10:00	0.393
2019-01-09 11:20:00	0.367
2019-01-09 11:30:00	0.334
2019-01-09 11:40:00	0.308
2019-01-09 11:50:00	0.286
2019-01-09 12:00:00	0.266
2019-01-09 12:10:00	0.242
2019-01-09 12:20:00	0.218
2019-01-09 12:30:00	0.194
2019-01-09 12:40:00	0.171
2019-01-09 12:50:00	0.153
2019-01-09 13:00:00	0.14
2019-01-09 13:10:00	0.129
2019-01-09 13:20:00	0.106
2019-01-09 13:30:00	0.089
2019-01-09 13:40:00	0.064
2019-01-09 13:50:00	0.06
2019-01-09 14:00:00	0.052
2019-01-09 14:10:00	0.056
2019-01-09 14:20:00	0.051
2019-01-09 14:30:00	0.035
2019-01-09 14:40:00	0.032
2019-01-09 14:50:00	0.038
2019-01-09 15:00:00	0.045
2019-01-09 15:10:00	0.062
2019-01-09 15:20:00	0.077
2019-01-09 15:30:00	0.072
2019-01-09 15:40:00	0.082
2019-01-09 15:50:00	0.097
2019-01-09 16:00:00	0.126
2019-01-09 16:10:00	0.146
2019-01-09 16:20:00	0.176
2019-01-09 16:30:00	0.179
2019-01-09 16:40:00	0.199
2019-01-09 16:50:00	0.22
2019-01-09 17:00:00	0.248
2019-01-09 17:10:00	0.286
2019-01-09 17:20:00	0.308
2019-01-09 17:30:00	0.331
2019-01-09 17:40:00	0.34
2019-01-09 17:50:00	0.365
2019-01-09 18:00:00	0.386
2019-01-09 18:10:00	0.427
2019-01-09 18:20:00	0.444
2019-01-09 18:30:00	0.468
2019-01-09 18:40:00	0.479
2019-01-09 18:50:00	0.493
2019-01-09 19:00:00	0.52
2019-01-09 19:10:00	0.545
2019-01-09 19:20:00	0.569
2019-01-09 19:30:00	0.58
2019-01-09 19:40:00	0.586
2019-01-09 19:50:00	0.58
2019-01-09 20:00:00	0.581
2019-01-09 20:10:00	0.605
2019-01-09 20:20:00	0.606
2019-01-09 20:30:00	0.613
2019-01-09 20:40:00	0.607
2019-01-09 20:50:00	0.582
2019-01-09 21:00:00	0.579
2019-01-09 21:10:00	0.571
2019-01-09 21:20:00	0.563
2019-01-09 21:30:00	0.555
2019-01-09 21:40:00	0.532
2019-01-09 21:50:00	0.51
2019-01-09 22:00:00	0.479
2019-01-09 22:10:00	0.467
2019-01-09 22:20:00	0.456
2019-01-09 22:30:00	0.437
2019-01-09 22:40:00	0.418
2019-01-09 22:50:00	0.387
2019-01-09 23:00:00	0.36
2019-01-09 23:10:00	0.334
2019-01-09 23:20:00	0.322
2019-01-09 23:30:00	0.295
2019-01-09 23:40:00	0.273
2019-01-09 23:50:00	0.238
2019-01-10	0.21
2019-01-10 00:10:00	0.188
2019-01-10 00:20:00	0.175
2019-01-10 00:30:00	0.159
2019-01-10 00:40:00	0.14
2019-01-10 00:50:00	0.117
2019-01-10 01:00:00	0.092
2019-01-10 01:10:00	0.077
2019-01-10 01:20:00	0.062
2019-01-10 01:30:00	0.062
2019-01-10 01:40:00	0.048
2019-01-10 01:50:00	0.039
2019-01-10 02:00:00	0.02
2019-01-10 02:10:00	0.014
2019-01-10 02:20:00	0.004
2019-01-10 02:30:00	0.005
2019-01-10 02:40:00	0.006
2019-01-10 02:50:00	-0.001
2019-01-10 03:00:00	-0.011
2019-01-10 03:10:00	-0.008
2019-01-10 03:20:00	-0.002
2019-01-10 03:30:00	0.012
2019-01-10 03:40:00	0.03
2019-01-10 03:50:00	0.035
2019-01-10 04:00:00	0.043
2019-01-10 04:10:00	0.057
2019-01-10 04:20:00	0.079
2019-01-10 04:30:00	0.101
2019-01-10 04:40:00	0.129
2019-01-10 04:50:00	0.143
2019-01-10 05:00:00	0.155
2019-01-10 05:10:00	0.176
2019-01-10 05:20:00	0.196
2019-01-10 05:30:00	0.223
2019-01-10 05:40:00	0.253
2019-01-10 05:50:00	0.266
2019-01-10 06:00:00	0.295
2019-01-10 06:10:00	0.316
2019-01-10 06:20:00	0.334
2019-01-10 06:30:00	0.369
2019-01-10 06:40:00	0.399
2019-01-10 06:50:00	0.415
2019-01-10 07:00:00	0.446
2019-01-10 07:10:00	0.47
2019-01-10 07:20:00	0.491
2019-01-10 07:30:00	0.518
2019-01-10 07:40:00	0.541
2019-01-10 07:50:00	0.548
2019-01-10 08:00:00	0.567
2019-01-10 08:10:00	0.574
2019-01-10 08:20:00	0.588
2019-01-10 08:30:00	0.606
2019-01-10 08:40:00	0.608
2019-01-10 08:50:00	0.61
2019-01-10 09:00:00	0.612
2019-01-10 09:10:00	0.611
2019-01-10 09:20:00	0.606
2019-01-10 09:30:00	0.616
2019-01-10 09:40:00	0.605
2019-01-10 09:50:00	0.591
2019-01-10 10:00:00	0.576
2019-01-10 10:10:00	0.565
2019-01-10 10:20:00	0.542
2019-01-10 10:30:00	0.541
2019-01-10 10:40:00	0.521
2019-01-10 10:50:00	0.498
2019-01-10 11:00:00	0.475
2019-01-10 11:10:00	0.446
2019-01-10 11:20:00	0.422
2019-01-10 11:30:00	0.406
2019-01-10 11:40:00	0.395
2019-01-10 11:50:00	0.365
2019-01-10 12:00:00	0.336
2019-01-10 12:10:00	0.294
2019-01-10 12:20:00	0.279
2019-01-10 12:30:00	0.254
2019-01-10 12:40:00	0.244
2019-01-10 12:50:00	0.209
2019-01-10 13:00:00	0.186
2019-01-10 13:10:00	0.156
2019-01-10 13:20:00	0.131
2019-01-10 13:30:00	0.121
2019-01-10 13:40:00	0.111
2019-01-10 13:50:00	0.092
2019-01-10 14:00:00	0.077
2019-01-10 14:10:00	0.061
2019-01-10 14:20:00	0.041
2019-01-10 14:30:00	0.047
2019-01-10 14:40:00	0.046
2019-01-10 14:50:00	0.043
2019-01-10 15:00:00	0.033
2019-01-10 15:10:00	0.034
2019-01-10 15:20:00	0.027
2019-01-10 15:30:00	0.043
2019-01-10 15:40:00	0.051
2019-01-10 15:50:00	0.063
2019-01-10 16:00:00	0.068
2019-01-10 16:10:00	0.078
2019-01-10 16:20:00	0.084
2019-01-10 16:30:00	0.105
2019-01-10 16:40:00	0.127
2019-01-10 16:50:00	0.144
2019-01-10 17:00:00	0.165
2019-01-10 17:10:00	0.179
2019-01-10 17:20:00	0.201
2019-01-10 17:30:00	0.217
2019-01-10 17:40:00	0.253
2019-01-10 17:50:00	0.271
2019-01-10 18:00:00	0.299
2019-01-10 18:10:00	0.317
2019-01-10 18:20:00	0.34
2019-01-10 18:30:00	0.36
2019-01-10 18:40:00	0.39
2019-01-10 18:50:00	0.416
2019-01-10 19:00:00	0.44
2019-01-10 19:10:00	0.461
2019-01-10 19:20:00	0.472
2019-01-10 19:30:00	0.49
2019-01-10 19:40:00	0.507
2019-01-10 19:50:00	0.527
2019-01-10 20:00:00	0.537
2019-01-10 20:10:00	0.552
2019-01-10 20:20:00	0.552
2019-01-10 20:30:00	0.559
2019-01-10 20:40:00	0.565
2019-01-10 20:50:00	0.572
2019-01-10 21:00:00	0.572
2019-01-10 21:10:00	0.573
2019-01-10 21:20:00	0.566
2019-01-10 21:30:00	0.557
2019-01-10 21:40:00	0.551
2019-01-10 21:50:00	0.545
2019-01-10 22:00:00	0.538
2019-01-10 22:10:00	0.529
2019-01-10 22:20:00	0.511
2019-01-10 22:30:00	0.492
2019-01-10 22:40:00	0.475
2019-01-10 22:50:00	0.457
2019-01-10 23:00:00	0.44
2019-01-10 23:10:00	0.422
2019-01-10 23:20:00	0.394
2019-01-10 23:30:00	0.368
2019-01-10 23:40:00	0.342
2019-01-10 23:50:00	0.317
2019-01-11	0.294
2019-01-11 00:10:00	0.271
2019-01-11 00:20:00	0.244
2019-01-11 00:30:00	0.215
2019-01-11 00:40:00	0.195
2019-01-11 00:50:00	0.171
2019-01-11 01:00:00	0.158
2019-01-11 01:10:00	0.139
2019-01-11 01:20:00	0.121
2019-01-11 01:30:00	0.102
2019-01-11 01:40:00	0.086
2019-01-11 01:50:00	0.072
2019-01-11 02:00:00	0.062
2019-01-11 02:10:00	0.052
2019-01-11 02:20:00	0.041
2019-01-11 02:30:00	0.031
2019-01-11 02:40:00	0.021
2019-01-11 02:50:00	0.016
2019-01-11 03:00:00	0.011
2019-01-11 03:10:00	0.009
2019-01-11 03:20:00	0.004
2019-01-11 03:30:00	0.002
2019-01-11 03:40:00	0
2019-01-11 03:50:00	0.004
2019-01-11 04:00:00	0.01
2019-01-11 04:10:00	0.018
2019-01-11 04:20:00	0.023
2019-01-11 04:30:00	0.032
2019-01-11 04:40:00	0.042
2019-01-11 04:50:00	0.057
2019-01-11 05:00:00	0.077
2019-01-11 05:10:00	0.093
2019-01-11 05:20:00	0.114
2019-01-11 05:30:00	0.132
2019-01-11 05:40:00	0.152
2019-01-11 05:50:00	0.171
2019-01-11 06:00:00	0.196
2019-01-11 06:10:00	0.22
2019-01-11 06:20:00	0.244
2019-01-11 06:30:00	0.268
2019-01-11 06:40:00	0.292
2019-01-11 06:50:00	0.32
2019-01-11 07:00:00	0.345
2019-01-11 07:10:00	0.37
2019-01-11 07:20:00	0.397
2019-01-11 07:30:00	0.415
2019-01-11 07:40:00	0.438
2019-01-11 07:50:00	0.463
2019-01-11 08:00:00	0.487
2019-01-11 08:10:00	0.507
2019-01-11 08:20:00	0.526
2019-01-11 08:30:00	0.537
2019-01-11 08:40:00	0.553
2019-01-11 08:50:00	0.566
2019-01-11 09:00:00	0.581
2019-01-11 09:10:00	0.59
2019-01-11 09:20:00	0.599
2019-01-11 09:30:00	0.599
2019-01-11 09:40:00	0.597
2019-01-11 09:50:00	0.6
2019-01-11 10:00:00	0.595
2019-01-11 10:10:00	0.594
2019-01-11 10:20:00	0.591
2019-01-11 10:30:00	0.582
2019-01-11 10:40:00	0.567
2019-01-11 10:50:00	0.555
2019-01-11 11:00:00	0.537
2019-01-11 11:10:00	0.516
2019-01-11 11:20:00	0.499
2019-01-11 11:30:00	0.478
2019-01-11 11:40:00	0.449
2019-01-11 11:50:00	0.43
2019-01-11 12:00:00	0.408
2019-01-11 12:10:00	0.382
2019-01-11 12:20:00	0.361
2019-01-11 12:30:00	0.333
2019-01-11 12:40:00	0.304
2019-01-11 12:50:00	0.276
2019-01-11 13:00:00	0.258
2019-01-11 13:10:00	0.239
2019-01-11 13:20:00	0.221
2019-01-11 13:30:00	0.199
2019-01-11 13:40:00	0.179
2019-01-11 13:50:00	0.158
2019-01-11 14:00:00	0.135
2019-01-11 14:10:00	0.128
2019-01-11 14:20:00	0.114
2019-01-11 14:30:00	0.097
2019-01-11 14:40:00	0.086
2019-01-11 14:50:00	0.071
2019-01-11 15:00:00	0.058
2019-01-11 15:10:00	0.059
2019-01-11 15:20:00	0.061
2019-01-11 15:30:00	0.05
2019-01-11 15:40:00	0.055
2019-01-11 15:50:00	0.045
2019-01-11 16:00:00	0.046
2019-01-11 16:10:00	0.057
2019-01-11 16:20:00	0.071
2019-01-11 16:30:00	0.079
2019-01-11 16:40:00	0.09
2019-01-11 16:50:00	0.095
2019-01-11 17:00:00	0.102
2019-01-11 17:10:00	0.123
2019-01-11 17:20:00	0.138
2019-01-11 17:30:00	0.154
2019-01-11 17:40:00	0.179
2019-01-11 17:50:00	0.193
2019-01-11 18:00:00	0.202
2019-01-11 18:10:00	0.229
2019-01-11 18:20:00	0.246
2019-01-11 18:30:00	0.274
2019-01-11 18:40:00	0.298
2019-01-11 18:50:00	0.319
2019-01-11 19:00:00	0.338
2019-01-11 19:10:00	0.365
2019-01-11 19:20:00	0.384
2019-01-11 19:30:00	0.409
2019-01-11 19:40:00	0.438
2019-01-11 19:50:00	0.452
2019-01-11 20:00:00	0.464
2019-01-11 20:10:00	0.486
2019-01-11 20:20:00	0.502
2019-01-11 20:30:00	0.519
2019-01-11 20:40:00	0.535
2019-01-11 20:50:00	0.542
2019-01-11 21:00:00	0.547
2019-01-11 21:10:00	0.548
2019-01-11 21:20:00	0.558
2019-01-11 21:30:00	0.569
2019-01-11 21:40:00	0.576
2019-01-11 21:50:00	0.576
2019-01-11 22:00:00	0.56
2019-01-11 22:10:00	0.548
2019-01-11 22:20:00	0.544
2019-01-11 22:30:00	0.544
2019-01-11 22:40:00	0.542
2019-01-11 22:50:00	0.532
2019-01-11 23:00:00	0.515
2019-01-11 23:10:00	0.498
2019-01-11 23:20:00	0.482
2019-01-11 23:30:00	0.477
2019-01-11 23:40:00	0.468
2019-01-11 23:50:00	0.452
2019-01-12	0.43
2019-01-12 00:10:00	0.406
2019-01-12 00:20:00	0.385
2019-01-12 00:30:00	0.356
2019-01-12 00:40:00	0.341
2019-01-12 00:50:00	0.335
2019-01-12 01:00:00	0.306
2019-01-12 01:10:00	0.29
2019-01-12 01:20:00	0.263
2019-01-12 01:30:00	0.243
2019-01-12 01:40:00	0.215
2019-01-12 01:50:00	0.207
2019-01-12 02:00:00	0.191
2019-01-12 02:10:00	0.175
2019-01-12 02:20:00	0.156
2019-01-12 02:30:00	0.14
2019-01-12 02:40:00	0.135
2019-01-12 02:50:00	0.12
2019-01-12 03:00:00	0.113
2019-01-12 03:10:00	0.105
2019-01-12 03:20:00	0.098
2019-01-12 03:30:00	0.081
2019-01-12 03:40:00	0.083
2019-01-12 03:50:00	0.087
2019-01-12 04:00:00	0.072
2019-01-12 04:10:00	0.08
2019-01-12 04:20:00	0.073
2019-01-12 04:30:00	0.08
2019-01-12 04:40:00	0.081
2019-01-12 04:50:00	0.091
2019-01-12 05:00:00	0.104
2019-01-12 05:10:00	0.108
2019-01-12 05:20:00	0.127
2019-01-12 05:30:00	0.137
2019-01-12 05:40:00	0.153
2019-01-12 05:50:00	0.165
2019-01-12 06:00:00	0.191
2019-01-12 06:10:00	0.189
2019-01-12 06:20:00	0.23
2019-01-12 06:30:00	0.236
2019-01-12 06:40:00	0.266
2019-01-12 06:50:00	0.288
2019-01-12 07:00:00	0.313
2019-01-12 07:10:00	0.329
2019-01-12 07:20:00	0.358
2019-01-12 07:30:00	0.388
2019-01-12 07:40:00	0.408
2019-01-12 07:50:00	0.449
2019-01-12 08:00:00	0.46
2019-01-12 08:10:00	0.483
2019-01-12 08:20:00	0.501
2019-01-12 08:30:00	0.522
2019-01-12 08:40:00	0.538
2019-01-12 08:50:00	0.578
2019-01-12 09:00:00	0.592
2019-01-12 09:10:00	0.601
2019-01-12 09:20:00	0.61
2019-01-12 09:30:00	0.62
2019-01-12 09:40:00	0.629
2019-01-12 09:50:00	0.646
2019-01-12 10:00:00	0.667
2019-01-12 10:10:00	0.67
2019-01-12 10:20:00	0.678
2019-01-12 10:30:00	0.657
2019-01-12 10:40:00	0.662
2019-01-12 10:50:00	0.663
2019-01-12 11:00:00	0.676
2019-01-12 11:10:00	0.672
2019-01-12 11:20:00	0.656
2019-01-12 11:30:00	0.631
2019-01-12 11:40:00	0.61
2019-01-12 11:50:00	0.6
2019-01-12 12:00:00	0.592
2019-01-12 12:10:00	0.583
2019-01-12 12:20:00	0.558
2019-01-12 12:30:00	0.523
2019-01-12 12:40:00	0.502
2019-01-12 12:50:00	0.466
2019-01-12 13:00:00	0.448
2019-01-12 13:10:00	0.434
2019-01-12 13:20:00	0.41
2019-01-12 13:30:00	0.402
2019-01-12 13:40:00	0.379
2019-01-12 13:50:00	0.346
2019-01-12 14:00:00	0.338
2019-01-12 14:10:00	0.33
2019-01-12 14:20:00	0.306
2019-01-12 14:30:00	0.297
2019-01-12 14:40:00	0.286
2019-01-12 14:50:00	0.277
2019-01-12 15:00:00	0.244
2019-01-12 15:10:00	0.249
2019-01-12 15:20:00	0.222
2019-01-12 15:30:00	0.226
2019-01-12 15:40:00	0.212
2019-01-12 15:50:00	0.206
2019-01-12 16:00:00	0.191
2019-01-12 16:10:00	0.185
2019-01-12 16:20:00	0.179
2019-01-12 16:30:00	0.181
2019-01-12 16:40:00	0.208
2019-01-12 16:50:00	0.179
2019-01-12 17:00:00	0.197
2019-01-12 17:10:00	0.187
2019-01-12 17:20:00	0.214
2019-01-12 17:30:00	0.217
2019-01-12 17:40:00	0.252
2019-01-12 17:50:00	0.231
2019-01-12 18:00:00	0.257
2019-01-12 18:10:00	0.263
2019-01-12 18:20:00	0.282
2019-01-12 18:30:00	0.313
2019-01-12 18:40:00	0.355
2019-01-12 18:50:00	0.333
2019-01-12 19:00:00	0.348
2019-01-12 19:10:00	0.383
2019-01-12 19:20:00	0.389
2019-01-12 19:30:00	0.436
2019-01-12 19:40:00	0.472
2019-01-12 19:50:00	0.466
2019-01-12 20:00:00	0.483
2019-01-12 20:10:00	0.506
2019-01-12 20:20:00	0.51
2019-01-12 20:30:00	0.54
2019-01-12 20:40:00	0.587
2019-01-12 20:50:00	0.588
2019-01-12 21:00:00	0.603
2019-01-12 21:10:00	0.636
2019-01-12 21:20:00	0.609
2019-01-12 21:30:00	0.657
2019-01-12 21:40:00	0.664
2019-01-12 21:50:00	0.665
2019-01-12 22:00:00	0.682
2019-01-12 22:10:00	0.684
2019-01-12 22:20:00	0.652
2019-01-12 22:30:00	0.66
2019-01-12 22:40:00	0.671
2019-01-12 22:50:00	0.651
2019-01-12 23:00:00	0.667
2019-01-12 23:10:00	0.66
2019-01-12 23:20:00	0.627
2019-01-12 23:30:00	0.628
2019-01-12 23:40:00	0.656
2019-01-12 23:50:00	0.607
2019-01-13	0.602
2019-01-13 00:10:00	0.565
2019-01-13 00:20:00	0.554
2019-01-13 00:30:00	0.54
2019-01-13 00:40:00	0.548
2019-01-13 00:50:00	0.526
2019-01-13 01:00:00	0.533
2019-01-13 01:10:00	0.487
2019-01-13 01:20:00	0.464
2019-01-13 01:30:00	0.463
2019-01-13 01:40:00	0.414
2019-01-13 01:50:00	0.46
2019-01-13 02:00:00	0.372
2019-01-13 02:10:00	0.371
2019-01-13 02:20:00	0.478
2019-01-13 02:30:00	0.43
2019-01-13 02:40:00	0.443
2019-01-13 02:50:00	0.454
2019-01-13 03:00:00	0.402
2019-01-13 03:10:00	0.335
2019-01-13 03:20:00	0.259
2019-01-13 03:30:00	0.256
2019-01-13 03:40:00	0.291
2019-01-13 03:50:00	0.182
2019-01-13 04:00:00	0.198
2019-01-13 04:10:00	0.298
2019-01-13 04:20:00	0.199
2019-01-13 04:30:00	0.286
2019-01-13 04:40:00	0.343
2019-01-13 04:50:00	0.27
2019-01-13 05:00:00	0.219
2019-01-13 05:10:00	0.163
2019-01-13 05:20:00	0.298
2019-01-13 05:30:00	0.274
2019-01-13 05:40:00	0.225
2019-01-13 05:50:00	0.336
2019-01-13 06:00:00	0.364
2019-01-13 06:10:00	0.38
2019-01-13 06:20:00	0.379
2019-01-13 06:30:00	0.346
2019-01-13 06:40:00	0.349
2019-01-13 06:50:00	0.332
2019-01-13 07:00:00	0.464
2019-01-13 07:10:00	0.482
2019-01-13 07:20:00	0.481
2019-01-13 07:30:00	0.547
2019-01-13 07:40:00	0.499
2019-01-13 07:50:00	0.556
2019-01-13 08:00:00	0.577
2019-01-13 08:10:00	0.575
2019-01-13 08:20:00	0.64
2019-01-13 08:30:00	0.605
2019-01-13 08:40:00	0.529
2019-01-13 08:50:00	0.637
2019-01-13 09:00:00	0.635
2019-01-13 09:10:00	0.611
2019-01-13 09:20:00	0.707
2019-01-13 09:30:00	0.707
2019-01-13 09:40:00	0.763
2019-01-13 09:50:00	0.758
2019-01-13 10:00:00	0.742
2019-01-13 10:10:00	0.752
2019-01-13 10:20:00	0.795
2019-01-13 10:30:00	0.778
2019-01-13 10:40:00	0.804
2019-01-13 10:50:00	0.739
2019-01-13 11:00:00	0.753
2019-01-13 11:10:00	0.84
2019-01-13 11:20:00	0.8
2019-01-13 11:30:00	0.748
2019-01-13 11:40:00	0.748
2019-01-13 11:50:00	0.751
2019-01-13 12:00:00	0.736
2019-01-13 12:10:00	0.747
2019-01-13 12:20:00	0.755
2019-01-13 12:30:00	0.706
2019-01-13 12:40:00	0.728
2019-01-13 12:50:00	0.688
2019-01-13 13:00:00	0.643
2019-01-13 13:10:00	0.664
2019-01-13 13:20:00	0.617
2019-01-13 13:30:00	0.65
2019-01-13 13:40:00	0.611
2019-01-13 13:50:00	0.627
2019-01-13 14:00:00	0.607
2019-01-13 14:10:00	0.587
2019-01-13 14:20:00	0.527
2019-01-13 14:30:00	0.538
2019-01-13 14:40:00	0.519
2019-01-13 14:50:00	0.508
2019-01-13 15:00:00	0.473
2019-01-13 15:10:00	0.466
2019-01-13 15:20:00	0.463
2019-01-13 15:30:00	0.441
2019-01-13 15:40:00	0.407
2019-01-13 15:50:00	0.408
2019-01-13 16:00:00	0.419
2019-01-13 16:10:00	0.373
2019-01-13 16:20:00	0.385
2019-01-13 16:30:00	0.378
2019-01-13 16:40:00	0.361
2019-01-13 16:50:00	0.357
2019-01-13 17:00:00	0.339
2019-01-13 17:10:00	0.359
2019-01-13 17:20:00	0.355
2019-01-13 17:30:00	0.346
2019-01-13 17:40:00	0.35
2019-01-13 17:50:00	0.35
2019-01-13 18:00:00	0.36
2019-01-13 18:10:00	0.362
2019-01-13 18:20:00	0.365
2019-01-13 18:30:00	0.359
2019-01-13 18:40:00	0.364
2019-01-13 18:50:00	0.373
2019-01-13 19:00:00	0.384
2019-01-13 19:10:00	0.389
2019-01-13 19:20:00	0.413
2019-01-13 19:30:00	0.438
2019-01-13 19:40:00	0.44
2019-01-13 19:50:00	0.434
2019-01-13 20:00:00	0.458
2019-01-13 20:10:00	0.473
2019-01-13 20:20:00	0.494
2019-01-13 20:30:00	0.517
2019-01-13 20:40:00	0.507
2019-01-13 20:50:00	0.529
2019-01-13 21:00:00	0.544
2019-01-13 21:10:00	0.579
2019-01-13 21:20:00	0.59
2019-01-13 21:30:00	0.592
2019-01-13 21:40:00	0.61
2019-01-13 21:50:00	0.613
2019-01-13 22:00:00	0.626
2019-01-13 22:10:00	0.652
2019-01-13 22:20:00	0.644
2019-01-13 22:30:00	0.671
2019-01-13 22:40:00	0.656
2019-01-13 22:50:00	0.68
2019-01-13 23:00:00	0.678
2019-01-13 23:10:00	0.673
2019-01-13 23:20:00	0.704
2019-01-13 23:30:00	0.701
2019-01-13 23:40:00	0.699
2019-01-13 23:50:00	0.694
2019-01-14	0.705
2019-01-14 00:10:00	0.69
2019-01-14 00:20:00	0.695
2019-01-14 00:30:00	0.689
2019-01-14 00:40:00	0.665
2019-01-14 00:50:00	0.661
2019-01-14 01:00:00	0.658
2019-01-14 01:10:00	0.656
2019-01-14 01:20:00	0.634
2019-01-14 01:30:00	0.625
2019-01-14 01:40:00	0.609
2019-01-14 01:50:00	0.608
2019-01-14 02:00:00	0.567
2019-01-14 02:10:00	0.553
2019-01-14 02:20:00	0.521
2019-01-14 02:30:00	0.529
2019-01-14 02:40:00	0.52
2019-01-14 02:50:00	0.491
2019-01-14 03:00:00	0.467
2019-01-14 03:10:00	0.47
2019-01-14 03:20:00	0.455
2019-01-14 03:30:00	0.41
2019-01-14 03:40:00	0.406
2019-01-14 03:50:00	0.396
2019-01-14 04:00:00	0.378
2019-01-14 04:10:00	0.368
2019-01-14 04:20:00	0.356
2019-01-14 04:30:00	0.347
2019-01-14 04:40:00	0.35
2019-01-14 04:50:00	0.344
2019-01-14 05:00:00	0.343
2019-01-14 05:10:00	0.328
2019-01-14 05:20:00	0.335
2019-01-14 05:30:00	0.349
2019-01-14 05:40:00	0.329
2019-01-14 05:50:00	0.333
2019-01-14 06:00:00	0.309
2019-01-14 06:10:00	0.317
2019-01-14 06:20:00	0.342
2019-01-14 06:30:00	0.339
2019-01-14 06:40:00	0.353
2019-01-14 06:50:00	0.358
2019-01-14 07:00:00	0.364
2019-01-14 07:10:00	0.367
2019-01-14 07:20:00	0.387
2019-01-14 07:30:00	0.412
2019-01-14 07:40:00	0.423
2019-01-14 07:50:00	0.438
2019-01-14 08:00:00	0.448
2019-01-14 08:10:00	0.46
2019-01-14 08:20:00	0.479
2019-01-14 08:30:00	0.497
2019-01-14 08:40:00	0.527
2019-01-14 08:50:00	0.55
2019-01-14 09:00:00	0.561
2019-01-14 09:10:00	0.58
2019-01-14 09:20:00	0.601
2019-01-14 09:30:00	0.619
2019-01-14 09:40:00	0.65
2019-01-14 09:50:00	0.674
2019-01-14 10:00:00	0.674
2019-01-14 10:10:00	0.687
2019-01-14 10:20:00	0.708
2019-01-14 10:30:00	0.708
2019-01-14 10:40:00	0.734
2019-01-14 10:50:00	0.745
2019-01-14 11:00:00	0.737
2019-01-14 11:10:00	0.761
2019-01-14 11:20:00	0.755
2019-01-14 11:30:00	0.758
2019-01-14 11:40:00	0.774
2019-01-14 11:50:00	0.782
2019-01-14 12:00:00	0.756
2019-01-14 12:10:00	0.756
2019-01-14 12:20:00	0.751
2019-01-14 12:30:00	0.753
2019-01-14 12:40:00	0.758
2019-01-14 12:50:00	0.742
2019-01-14 13:00:00	0.744
2019-01-14 13:10:00	0.72
2019-01-14 13:20:00	0.717
2019-01-14 13:30:00	0.699
2019-01-14 13:40:00	0.695
2019-01-14 13:50:00	0.685
2019-01-14 14:00:00	0.675
2019-01-14 14:10:00	0.657
2019-01-14 14:20:00	0.637
2019-01-14 14:30:00	0.628
2019-01-14 14:40:00	0.62
2019-01-14 14:50:00	0.603
2019-01-14 15:00:00	0.59
2019-01-14 15:10:00	0.575
2019-01-14 15:20:00	0.557
2019-01-14 15:30:00	0.545
2019-01-14 15:40:00	0.527
2019-01-14 15:50:00	0.521
2019-01-14 16:00:00	0.51
2019-01-14 16:10:00	0.49
2019-01-14 16:20:00	0.474
2019-01-14 16:30:00	0.464
2019-01-14 16:40:00	0.454
2019-01-14 16:50:00	0.44
2019-01-14 17:00:00	0.434
2019-01-14 17:10:00	0.414
2019-01-14 17:20:00	0.413
2019-01-14 17:30:00	0.393
2019-01-14 17:40:00	0.395
2019-01-14 17:50:00	0.389
2019-01-14 18:00:00	0.387
2019-01-14 18:10:00	0.372
2019-01-14 18:20:00	0.377
2019-01-14 18:30:00	0.368
2019-01-14 18:40:00	0.373
2019-01-14 18:50:00	0.375
2019-01-14 19:00:00	0.378
2019-01-14 19:10:00	0.387
2019-01-14 19:20:00	0.39
2019-01-14 19:30:00	0.396
2019-01-14 19:40:00	0.399
2019-01-14 19:50:00	0.418
2019-01-14 20:00:00	0.426
2019-01-14 20:10:00	0.435
2019-01-14 20:20:00	0.443
2019-01-14 20:30:00	0.448
2019-01-14 20:40:00	0.459
2019-01-14 20:50:00	0.479
[truncated: 50,562 more rows]

## Sheet: Lagos
Location: Lagos
Source:
Date Time (GMT)	Height(m)
2008-11-01 04:00:00	2.394
2008-11-01 05:00:00	2.424
2008-11-01 06:00:00	2.368
2008-11-01 07:00:00	2.223
2008-11-01 08:00:00	1.995
2008-11-01 09:00:00	1.732
2008-11-01 10:00:00	1.514
2008-11-01 11:00:00	1.422
2008-11-01 12:00:00	1.451
2008-11-01 13:00:00	1.592
2008-11-01 14:00:00	1.81
2008-11-01 15:00:00	2.038
2008-11-01 16:00:00	2.22
2008-11-01 17:00:00	2.312
2008-11-01 18:00:00	2.332
2008-11-01 19:00:00	2.267
2008-11-01 20:00:00	2.121
2008-11-01 21:00:00	1.937
2008-11-01 22:00:00	1.771
2008-11-01 23:00:00	1.681
2008-11-02	1.711
2008-11-02 01:00:00	1.836
2008-11-02 02:00:00	2.007
2008-11-02 03:00:00	2.18
2008-11-02 04:00:00	2.313
2008-11-02 05:00:00	2.384
2008-11-02 06:00:00	2.384
2008-11-02 07:00:00	2.299
2008-11-02 08:00:00	2.131
2008-11-02 09:00:00	1.901
2008-11-02 10:00:00	1.671
2008-11-02 11:00:00	1.507
2008-11-02 12:00:00	1.467
2008-11-02 13:00:00	1.536
2008-11-02 14:00:00	1.689
2008-11-03 22:00:00	1.971
2008-11-04 13:00:00	1.557
2008-11-04 14:00:00	1.574
2008-11-04 15:00:00	1.657
2008-11-04 16:00:00	1.789
2008-11-04 17:00:00	1.936
2008-11-04 18:00:00	2.057
2008-11-04 19:00:00	2.134
2008-11-04 20:00:00	2.168
2008-11-04 21:00:00	2.143
2008-11-04 22:00:00	2.068
2008-11-04 23:00:00	1.967
2008-11-05	1.868
2008-11-05 01:00:00	1.801
2008-11-05 02:00:00	1.786
2008-11-05 03:00:00	1.828
2008-11-05 04:00:00	1.912
2008-11-05 05:00:00	2.011
2008-11-05 06:00:00	2.093
2008-11-05 07:00:00	2.144
2008-11-05 08:00:00	2.154
2008-11-05 09:00:00	2.107
2008-11-05 10:00:00	2.005
2008-11-05 11:00:00	1.863
2008-11-05 12:00:00	1.721
2008-11-05 13:00:00	1.644
2008-11-05 14:00:00	1.651
2008-11-05 15:00:00	1.629
2008-11-05 16:00:00	1.704
2008-11-05 17:00:00	1.823
2008-11-05 18:00:00	1.956
2008-11-05 19:00:00	2.065
2008-11-05 20:00:00	2.141
2008-11-05 21:00:00	2.181
2008-11-05 22:00:00	2.171
2008-11-05 23:00:00	2.117
2008-11-06	2.019
2008-11-06 01:00:00	1.915
2008-11-06 02:00:00	1.844
2008-11-06 03:00:00	1.818
2008-11-06 04:00:00	1.84
2008-11-06 05:00:00	1.903
2008-11-06 06:00:00	1.985
2008-11-06 07:00:00	2.06
2008-11-06 08:00:00	2.112
2008-11-06 09:00:00	2.13
2008-11-06 10:00:00	2.096
2008-11-06 11:00:00	2.067
2008-11-06 12:00:00	1.944
2008-11-06 13:00:00	1.817
2008-11-06 14:00:00	1.717
2008-11-06 15:00:00	1.668
2008-11-06 16:00:00	1.672
2008-11-06 17:00:00	1.704
2008-11-06 18:00:00	1.828
2008-11-06 19:00:00	1.968
2008-11-06 20:00:00	2.061
2008-11-06 21:00:00	2.128
2008-11-06 22:00:00	2.206
2008-11-06 23:00:00	2.234
2008-11-07	2.196
2008-11-07 01:00:00	2.118
2008-11-07 02:00:00	1.989
2008-11-07 03:00:00	1.88
2008-11-07 04:00:00	1.813
2008-11-07 05:00:00	1.798
2008-11-07 06:00:00	1.838
2008-11-07 07:00:00	1.911
2008-11-07 08:00:00	2.005
2008-11-07 09:00:00	2.129
2008-11-07 10:00:00	2.08
2008-11-07 11:00:00	2.122
2008-11-07 12:00:00	2.047
2008-11-07 13:00:00	1.931
2008-11-07 14:00:00	1.809
2008-11-07 15:00:00	1.705
2008-11-07 16:00:00	1.609
2008-11-07 17:00:00	1.6
2008-11-07 18:00:00	1.658
2008-11-07 19:00:00	1.775
2008-11-07 20:00:00	1.912
2008-11-07 21:00:00	2.036
2008-11-07 22:00:00	2.14
2008-11-07 23:00:00	2.238
2008-11-08	2.252
2008-11-08 01:00:00	2.196
2008-11-08 02:00:00	2.083
2008-11-08 03:00:00	1.948
2008-11-08 04:00:00	1.819
2008-11-08 05:00:00	1.738
2008-11-08 06:00:00	1.722
2008-11-08 07:00:00	1.771
2008-11-08 08:00:00	1.867
2008-11-08 09:00:00	1.976
2008-11-08 10:00:00	2.069
2008-11-08 11:00:00	2.123
2008-11-08 12:00:00	2.11
2008-11-08 13:00:00	2.084
2008-11-08 14:00:00	1.963
2008-11-08 15:00:00	1.816
2008-11-08 16:00:00	1.682
2008-11-08 17:00:00	1.596
2008-11-08 18:00:00	1.581
2008-11-08 19:00:00	1.649
2008-11-08 20:00:00	1.788
2008-11-08 21:00:00	1.949
2008-11-08 22:00:00	2.101
2008-11-08 23:00:00	2.221
2008-11-09	2.302
2008-11-09 01:00:00	2.383
2008-11-09 02:00:00	2.265
2008-11-09 03:00:00	2.084
2008-11-09 04:00:00	1.877
2008-11-09 05:00:00	1.676
2008-11-09 06:00:00	1.56
2008-11-09 07:00:00	1.532
2008-11-09 08:00:00	1.641
2008-11-09 09:00:00	1.81
2008-11-09 10:00:00	1.991
2008-11-09 11:00:00	2.12
2008-11-09 12:00:00	2.203
2008-11-09 13:00:00	2.216
2008-11-09 14:00:00	2.148
2008-11-09 15:00:00	2.001
2008-11-09 16:00:00	1.819
2008-11-09 17:00:00	1.654
2008-11-09 18:00:00	1.553
2008-11-09 19:00:00	1.543
2008-11-09 20:00:00	1.639
2008-11-09 21:00:00	1.827
2008-11-09 22:00:00	2.05
2008-11-09 23:00:00	2.253
2008-11-10	2.371
2008-11-10 01:00:00	2.457
2008-11-10 02:00:00	2.425
2008-11-10 03:00:00	2.301
2008-11-10 04:00:00	2.074
2008-11-10 05:00:00	1.828
2008-11-10 06:00:00	1.631
2008-11-10 07:00:00	1.529
2008-11-10 08:00:00	1.541
2008-11-10 09:00:00	1.656
2008-11-10 10:00:00	1.837
2008-11-10 11:00:00	2.023
2008-11-10 12:00:00	2.177
2008-11-10 13:00:00	2.268
2008-11-10 14:00:00	2.276
2008-11-10 15:00:00	2.187
2008-11-10 16:00:00	1.999
2008-11-10 17:00:00	1.772
2008-11-10 18:00:00	1.6
2008-11-10 19:00:00	1.518
2008-11-10 20:00:00	1.553
2008-11-10 21:00:00	1.709
2008-11-10 22:00:00	1.943
2008-11-10 23:00:00	2.187
2008-11-11	2.393
2008-11-11 01:00:00	2.526
2008-11-11 02:00:00	2.563
2008-11-11 03:00:00	2.484
2008-11-11 04:00:00	2.266
2008-11-11 05:00:00	1.948
2008-11-11 06:00:00	1.627
2008-11-11 07:00:00	1.433
2008-11-11 08:00:00	1.366
2008-11-11 09:00:00	1.433
2008-11-11 10:00:00	1.603
2008-11-11 11:00:00	1.832
2008-11-11 12:00:00	2.043
2008-11-11 13:00:00	2.214
2008-11-11 14:00:00	2.308
2008-11-11 15:00:00	2.302
2008-11-11 16:00:00	2.18
2008-11-11 17:00:00	1.966
2008-11-11 18:00:00	1.722
2008-11-11 19:00:00	1.532
2008-11-11 20:00:00	1.457
2008-11-11 21:00:00	1.524
2008-11-11 22:00:00	1.72
2008-11-11 23:00:00	2.022
2008-11-12	2.128
2008-11-12 23:00:00	1.833
2008-11-13	2.111
2008-11-13 01:00:00	2.358
2008-11-13 02:00:00	2.527
2008-11-13 17:00:00	2.376
2008-11-13 18:00:00	2.155
2008-11-13 19:00:00	1.861
2008-11-13 20:00:00	1.577
2008-11-13 21:00:00	1.418
2008-11-13 22:00:00	1.416
2008-11-13 23:00:00	1.564
2008-11-14	1.823
2008-11-14 01:00:00	2.117
2008-11-14 02:00:00	2.365
2008-11-14 03:00:00	2.529
2008-11-14 04:00:00	2.595
2008-11-14 05:00:00	2.505
2008-11-14 06:00:00	2.267
2008-11-14 07:00:00	1.902
2008-11-14 08:00:00	1.51
2008-11-14 09:00:00	1.224
2008-11-14 10:00:00	1.095
2008-11-14 11:00:00	1.131
2008-11-14 12:00:00	1.35
2008-11-14 13:00:00	1.622
2008-11-14 14:00:00	1.962
2008-11-14 15:00:00	2.201
2008-11-14 16:00:00	2.359
2008-11-15 10:00:00	1.138
2008-11-16 12:00:00	1.115
2008-11-17 11:00:00	1.391
2008-11-17 12:00:00	1.271
2008-11-17 13:00:00	1.262
2008-11-17 14:00:00	1.378
2008-11-17 15:00:00	1.57
2008-11-17 16:00:00	1.798
2008-11-18 11:00:00	1.709
2008-11-18 12:00:00	1.502
2008-11-18 13:00:00	1.39
2008-11-18 14:00:00	1.384
2008-11-18 15:00:00	1.481
2008-11-19 10:00:00	2.154
2008-11-19 11:00:00	2.001
2008-11-19 12:00:00	1.788
2008-11-19 13:00:00	1.61
2008-11-19 14:00:00	1.506
2008-11-19 15:00:00	1.487
2008-11-19 16:00:00	1.555
2008-11-19 17:00:00	1.721
2008-11-19 18:00:00	1.901
2008-11-19 19:00:00	2.066
2008-11-19 20:00:00	2.213
2008-11-19 21:00:00	2.324
2008-11-19 22:00:00	2.375
2008-11-19 23:00:00	2.334
2008-11-20	2.208
2008-11-20 01:00:00	2.04
2008-11-20 02:00:00	1.896
2008-11-20 03:00:00	1.781
2008-11-20 04:00:00	1.758
2008-11-20 05:00:00	1.803
2008-11-20 06:00:00	1.892
2008-11-20 07:00:00	1.995
2008-11-20 08:00:00	2.082
2008-11-20 09:00:00	2.14
2008-11-20 10:00:00	2.16
2008-11-20 11:00:00	2.11
2008-11-20 12:00:00	1.986
2008-11-20 13:00:00	1.808
2008-11-20 14:00:00	1.65
2008-11-20 15:00:00	1.563
2008-11-20 16:00:00	1.546
2008-11-20 17:00:00	1.61
2008-11-20 18:00:00	1.733
2008-11-20 19:00:00	1.879
2008-11-20 20:00:00	2.023
2008-11-21 09:00:00	2.031
2008-11-21 10:00:00	2.107
2008-11-21 11:00:00	2.144
2008-11-21 12:00:00	2.115
2008-11-21 13:00:00	2.014
2008-11-21 14:00:00	1.871
2008-11-21 15:00:00	1.735
2008-11-21 16:00:00	1.643
2008-11-21 17:00:00	1.618
2008-11-21 18:00:00	1.673
2008-11-21 19:00:00	1.789
2008-11-21 20:00:00	1.932
2008-11-21 21:00:00	2.032
2008-11-21 22:00:00	2.168
2008-11-21 23:00:00	2.276
2008-11-22	2.319
2008-11-22 01:00:00	2.267
2008-11-22 02:00:00	2.118
2008-11-22 03:00:00	1.923
2008-11-22 04:00:00	1.748
2008-11-22 05:00:00	1.626
2008-11-22 06:00:00	1.574
2008-11-22 07:00:00	1.602
2008-11-22 08:00:00	1.687
2008-11-22 09:00:00	1.798
2008-11-22 10:00:00	1.906
2008-11-22 11:00:00	1.996
2008-11-22 12:00:00	2.044
2008-11-22 13:00:00	2.028
2008-11-22 14:00:00	1.935
2008-11-22 15:00:00	1.791
2008-11-22 16:00:00	1.658
2008-11-22 17:00:00	1.565
2008-11-22 18:00:00	1.545
2008-11-22 19:00:00	1.608
2008-11-22 20:00:00	1.729
2008-11-22 21:00:00	1.877
2008-11-22 22:00:00	2.036
2008-11-22 23:00:00	2.186
2008-11-23	2.296
2008-11-23 01:00:00	2.332
2008-11-23 02:00:00	2.266
2008-11-23 03:00:00	2.105
2008-11-23 04:00:00	1.9
2008-11-23 05:00:00	1.712
2008-11-23 06:00:00	1.585
2008-11-23 07:00:00	1.542
2008-11-23 08:00:00	1.564
2008-11-23 09:00:00	1.65
2008-11-23 10:00:00	1.781
2008-11-23 11:00:00	1.906
2008-11-23 12:00:00	2.008
2008-11-23 13:00:00	2.065
2008-11-23 14:00:00	2.048
2008-11-23 15:00:00	1.983
2008-11-23 16:00:00	1.865
2008-11-23 17:00:00	1.712
2008-11-23 18:00:00	1.612
2008-11-23 19:00:00	1.593
2008-11-23 20:00:00	1.669
2008-11-23 21:00:00	1.809
2008-11-23 22:00:00	1.977
2008-11-23 23:00:00	2.147
2008-11-24	2.291
2008-11-24 01:00:00	2.375
2008-11-24 02:00:00	2.377
2008-11-24 03:00:00	2.271
2008-11-24 04:00:00	2.07
2008-11-24 05:00:00	1.835
2008-11-24 06:00:00	1.535
2008-11-24 07:00:00	1.462
2008-11-24 08:00:00	1.49
2008-11-24 09:00:00	1.58
2008-11-24 10:00:00	1.731
2008-11-24 11:00:00	1.9
2008-11-24 12:00:00	2.057
2008-11-24 13:00:00	2.125
2008-11-24 14:00:00	2.134
2008-11-24 15:00:00	2.1
2008-11-24 16:00:00	1.976
2008-11-24 17:00:00	1.801
2008-11-24 18:00:00	1.64
2008-11-24 19:00:00	1.547
2008-11-24 20:00:00	1.553
2008-11-24 21:00:00	1.651
2008-11-24 22:00:00	1.81
2008-11-24 23:00:00	1.989
2008-11-25	2.151
2008-11-26 03:00:00	2.319
2008-11-26 20:00:00	1.5
2008-11-26 21:00:00	1.488
2008-11-26 22:00:00	1.587
2008-11-26 23:00:00	1.769
2008-11-27	1.981
2008-11-27 01:00:00	2.175
2008-11-27 02:00:00	2.305
2008-11-27 03:00:00	2.364
2008-11-27 04:00:00	2.341
2008-11-27 05:00:00	2.206
2008-11-27 06:00:00	1.966
2008-11-27 07:00:00	1.689
2008-11-27 08:00:00	1.463
2008-11-27 09:00:00	1.343
2008-11-27 10:00:00	1.345
2008-11-27 11:00:00	1.467
2008-11-27 12:00:00	1.671
2008-11-27 13:00:00	1.89
2008-11-27 14:00:00	2.072
2008-11-27 15:00:00	2.196
2008-11-27 16:00:00	2.246
2008-11-27 17:00:00	2.202
2008-11-27 18:00:00	2.06
2008-11-27 19:00:00	1.855
2008-11-27 20:00:00	1.658
2008-11-27 21:00:00	1.548
2008-11-27 22:00:00	1.552
2008-11-27 23:00:00	1.663
2008-11-28	1.837
2008-11-28 18:00:00	2.135
2008-11-28 19:00:00	2.009
2008-12-01 03:00:00	2.017
2008-12-01 04:00:00	2.179
2008-12-03 11:00:00	1.527
2008-12-03 12:00:00	1.337
2008-12-03 13:00:00	1.311
2008-12-03 14:00:00	1.383
2008-12-03 15:00:00	1.537
2008-12-03 16:00:00	1.7
2008-12-03 17:00:00	1.954
2008-12-03 18:00:00	2.017
2008-12-03 19:00:00	2.124
2008-12-03 20:00:00	2.152
2008-12-03 21:00:00	2.164
2008-12-03 22:00:00	2.025
2008-12-03 23:00:00	1.853
2008-12-04	1.814
2008-12-04 01:00:00	1.646
2008-12-04 02:00:00	1.634
2008-12-04 03:00:00	1.695
2008-12-04 04:00:00	1.812
2008-12-04 05:00:00	1.968
2008-12-04 06:00:00	2.093
2008-12-04 07:00:00	2.168
2008-12-04 08:00:00	2.162
2008-12-04 09:00:00	1.995
2008-12-04 10:00:00	1.934
2008-12-04 11:00:00	1.706
2008-12-04 12:00:00	1.545
2008-12-04 13:00:00	1.449
2008-12-04 14:00:00	1.442
2008-12-04 15:00:00	1.515
2008-12-04 16:00:00	1.657
2008-12-04 17:00:00	1.788
2008-12-04 18:00:00	1.964
2008-12-04 19:00:00	2.095
2008-12-04 20:00:00	2.177
2008-12-04 21:00:00	2.206
2008-12-04 22:00:00	2.169
2008-12-04 23:00:00	2.089
2008-12-05	1.923
2008-12-05 01:00:00	1.785
2008-12-05 02:00:00	1.689
2008-12-05 03:00:00	1.666
2008-12-05 04:00:00	1.707
2008-12-05 05:00:00	1.841
2008-12-05 06:00:00	1.983
2008-12-05 07:00:00	2.098
2008-12-05 08:00:00	2.112
2008-12-05 09:00:00	2.122
2008-12-05 10:00:00	2.022
2008-12-05 11:00:00	1.866
2008-12-05 12:00:00	1.681
2008-12-05 13:00:00	1.514
2008-12-05 14:00:00	1.411
2008-12-05 15:00:00	1.429
2008-12-05 16:00:00	1.522
2008-12-05 17:00:00	1.683
2008-12-05 18:00:00	1.824
2008-12-05 19:00:00	1.969
2008-12-05 20:00:00	2.104
2008-12-05 21:00:00	2.198
2008-12-05 22:00:00	2.225
2008-12-05 23:00:00	2.168
2008-12-06	2.046
2008-12-06 01:00:00	1.893
2008-12-06 02:00:00	1.756
2008-12-06 03:00:00	1.677
2008-12-06 04:00:00	1.668
2008-12-06 05:00:00	1.72
2008-12-06 06:00:00	1.816
2008-12-06 07:00:00	1.925
2008-12-06 08:00:00	2.012
2008-12-06 09:00:00	2.059
2008-12-06 10:00:00	2.038
2008-12-06 11:00:00	1.958
2008-12-06 12:00:00	1.845
2008-12-06 13:00:00	1.703
2008-12-06 14:00:00	1.554
2008-12-06 15:00:00	1.509
2008-12-06 16:00:00	1.497
2008-12-06 17:00:00	1.557
2008-12-06 18:00:00	1.683
2008-12-06 19:00:00	1.854
2008-12-06 20:00:00	1.984
2008-12-06 21:00:00	2.112
2008-12-06 22:00:00	2.201
2008-12-06 23:00:00	2.255
2008-12-07	2.157
2008-12-07 01:00:00	1.991
2008-12-07 02:00:00	1.775
2008-12-07 03:00:00	1.618
2008-12-07 04:00:00	1.521
2008-12-07 05:00:00	1.493
2008-12-07 06:00:00	1.534
2008-12-07 07:00:00	1.629
2008-12-07 08:00:00	1.745
2008-12-07 09:00:00	1.885
2008-12-07 10:00:00	1.917
2008-12-07 11:00:00	1.961
2008-12-07 12:00:00	1.942
2008-12-07 13:00:00	1.864
2008-12-07 14:00:00	1.751
2008-12-07 15:00:00	1.568
2008-12-07 16:00:00	1.493
2008-12-07 17:00:00	1.488
2008-12-07 18:00:00	1.562
2008-12-07 19:00:00	1.706
2008-12-07 20:00:00	1.879
2008-12-07 21:00:00	2.037
2008-12-07 22:00:00	2.164
2008-12-07 23:00:00	2.243
2008-12-08	2.234
2008-12-08 01:00:00	2.137
2008-12-08 02:00:00	1.964
2008-12-08 03:00:00	1.752
2008-12-08 04:00:00	1.559
2008-12-08 05:00:00	1.43
2008-12-08 06:00:00	1.385
2008-12-08 07:00:00	1.433
2008-12-08 08:00:00	1.547
2008-12-08 09:00:00	1.727
2008-12-08 10:00:00	1.894
2008-12-08 11:00:00	2.025
2008-12-08 12:00:00	1.999
2008-12-08 13:00:00	1.81
2008-12-08 14:00:00	1.878
2008-12-08 15:00:00	1.683
2008-12-08 16:00:00	1.542
2008-12-08 17:00:00	1.446
2008-12-08 18:00:00	1.427
2008-12-08 19:00:00	1.521
2008-12-08 20:00:00	1.67
2008-12-08 21:00:00	1.843
2008-12-08 22:00:00	2.038
2008-12-08 23:00:00	2.193
2008-12-09	2.288
2008-12-09 01:00:00	2.294
2008-12-09 02:00:00	2.196
2008-12-09 03:00:00	2.012
2008-12-09 04:00:00	1.756
2008-12-09 05:00:00	1.534
2008-12-09 06:00:00	1.39
2008-12-09 07:00:00	1.346
2008-12-09 08:00:00	1.402
2008-12-09 09:00:00	1.539
2008-12-09 10:00:00	1.709
2008-12-09 11:00:00	1.864
2008-12-09 12:00:00	2.005
2008-12-09 13:00:00	2.054
2008-12-09 14:00:00	2.022
2008-12-09 15:00:00	1.948
2008-12-09 16:00:00	1.796
2008-12-09 17:00:00	1.57
2008-12-09 18:00:00	1.421
2008-12-09 19:00:00	1.407
2008-12-09 20:00:00	1.462
2008-12-09 21:00:00	1.692
2008-12-09 22:00:00	1.894
2008-12-09 23:00:00	2.134
2008-12-10	2.288
2008-12-10 01:00:00	2.367
2008-12-10 02:00:00	2.33
2008-12-10 03:00:00	2.195
2008-12-10 04:00:00	1.958
2008-12-10 05:00:00	1.677
2008-12-10 06:00:00	1.375
2008-12-10 07:00:00	1.236
2008-12-10 08:00:00	1.203
2008-12-10 09:00:00	1.288
2008-12-10 10:00:00	1.478
2008-12-10 11:00:00	1.727
2008-12-10 12:00:00	1.868
2008-12-10 13:00:00	2.009
2008-12-10 14:00:00	2.081
2008-12-10 15:00:00	2.073
2008-12-10 16:00:00	1.932
2008-12-10 17:00:00	1.722
2008-12-10 18:00:00	1.462
2008-12-10 19:00:00	1.352
2008-12-10 20:00:00	1.331
2008-12-10 21:00:00	1.446
2008-12-10 22:00:00	1.643
2008-12-10 23:00:00	1.895
2008-12-11	2.131
2008-12-11 01:00:00	2.302
2008-12-11 02:00:00	2.358
2008-12-11 03:00:00	2.304
2008-12-11 04:00:00	2.151
2008-12-11 05:00:00	1.858
2008-12-11 06:00:00	1.467
2008-12-11 07:00:00	1.234
2008-12-11 08:00:00	1.063
2008-12-11 09:00:00	1.039
2008-12-11 10:00:00	1.196
2008-12-11 11:00:00	1.424
2008-12-11 12:00:00	1.678
2008-12-11 13:00:00	1.847
2008-12-11 14:00:00	2.086
2008-12-11 15:00:00	2.145
2008-12-11 16:00:00	2.091
2008-12-11 17:00:00	1.932
2008-12-11 18:00:00	1.681
2008-12-11 19:00:00	1.436
2008-12-11 20:00:00	1.295
2008-12-11 21:00:00	1.294
2008-12-11 22:00:00	1.423
2008-12-11 23:00:00	1.692
2008-12-12	1.962
2008-12-12 01:00:00	2.2
2008-12-12 02:00:00	2.368
2008-12-12 03:00:00	2.443
2008-12-12 04:00:00	2.368
2008-12-12 05:00:00	2.102
2008-12-12 06:00:00	1.759
2008-12-12 07:00:00	1.411
2008-12-12 08:00:00	1.128
2008-12-12 09:00:00	0.975
2008-12-12 10:00:00	1.015
2008-12-12 11:00:00	1.203
2008-12-12 12:00:00	1.491
2008-12-12 13:00:00	1.795
2008-12-12 14:00:00	2.034
2008-12-12 15:00:00	2.203
2008-12-12 16:00:00	2.278
2008-12-13 11:00:00	1.027
2008-12-13 12:00:00	1.255
2008-12-13 13:00:00	1.571
2008-12-13 14:00:00	1.846
2008-12-13 15:00:00	2.057
2008-12-14 10:00:00	1.026
2008-12-14 11:00:00	0.936
2008-12-14 12:00:00	1.042
2008-12-14 13:00:00	1.288
2008-12-14 14:00:00	1.608
2008-12-14 15:00:00	1.926
2008-12-14 16:00:00	2.212
2008-12-14 17:00:00	2.355
2008-12-15 09:00:00	1.58
2008-12-15 10:00:00	1.241
2008-12-15 11:00:00	1.033
2008-12-15 12:00:00	1.007
2008-12-15 13:00:00	1.125
2008-12-15 14:00:00	1.403
2008-12-15 15:00:00	1.687
2008-12-15 16:00:00	1.974
2008-12-15 17:00:00	2.21
2008-12-16 07:00:00	2.304
2008-12-16 08:00:00	2.153
2008-12-16 09:00:00	1.877
2008-12-16 10:00:00	1.532
2008-12-16 11:00:00	1.254
2008-12-16 12:00:00	1.055
2008-12-16 13:00:00	1.073
2008-12-16 14:00:00	1.23
2008-12-16 15:00:00	1.454
2008-12-16 16:00:00	1.727
2008-12-16 17:00:00	1.995
2008-12-16 18:00:00	2.231
2008-12-16 19:00:00	2.334
2008-12-16 20:00:00	2.328
2008-12-16 21:00:00	2.19
2008-12-16 22:00:00	1.95
2008-12-16 23:00:00	1.687
2008-12-17	1.487
2008-12-17 01:00:00	1.43
2008-12-17 02:00:00	1.475
2008-12-17 03:00:00	1.619
2008-12-17 04:00:00	1.813
2008-12-17 05:00:00	1.995
2008-12-17 06:00:00	2.22
2008-12-17 07:00:00	2.228
2008-12-17 08:00:00	2.188
2008-12-17 09:00:00	2.074
2008-12-17 10:00:00	1.785
2008-12-17 11:00:00	1.485
2008-12-17 12:00:00	1.274
2008-12-17 13:00:00	1.179
2008-12-17 14:00:00	1.237
2008-12-17 15:00:00	1.4
2008-12-17 16:00:00	1.566
2008-12-17 17:00:00	1.894
2008-12-17 18:00:00	2.035
2008-12-17 19:00:00	2.22
2008-12-17 20:00:00	2.339
2008-12-17 21:00:00	2.326
2008-12-17 22:00:00	2.192
2008-12-17 23:00:00	1.967
2008-12-18	1.799
2008-12-18 01:00:00	1.567
2008-12-18 02:00:00	1.548
2008-12-18 03:00:00	1.604
2008-12-18 04:00:00	1.632
2008-12-18 05:00:00	1.843
2008-12-18 06:00:00	2.012
2008-12-18 07:00:00	2.076
2008-12-18 08:00:00	2.156
2008-12-18 09:00:00	2.139
2008-12-18 10:00:00	2.016
2008-12-18 11:00:00	1.812
2008-12-18 12:00:00	1.565
2008-12-18 13:00:00	1.412
2008-12-18 14:00:00	1.322
2008-12-18 15:00:00	1.401
2008-12-18 16:00:00	1.553
2008-12-18 17:00:00	1.754
2008-12-18 18:00:00	1.929
2008-12-18 19:00:00	2.137
2008-12-18 20:00:00	2.286
2008-12-18 21:00:00	2.354
2008-12-18 22:00:00	2.337
2008-12-18 23:00:00	2.215
2008-12-19	2.021
2008-12-19 01:00:00	1.814
2008-12-19 02:00:00	1.667
2008-12-19 03:00:00	1.606
2008-12-19 04:00:00	1.628
2008-12-19 05:00:00	1.717
2008-12-19 06:00:00	1.835
2008-12-19 07:00:00	1.942
2008-12-19 08:00:00	2.017
2008-12-19 09:00:00	2.088
2008-12-19 10:00:00	2.059
2008-12-19 11:00:00	1.913
2008-12-19 12:00:00	1.788
2008-12-19 13:00:00	1.559
2008-12-19 14:00:00	1.495
2008-12-19 15:00:00	1.405
2008-12-19 16:00:00	1.465
2008-12-19 17:00:00	1.564
2008-12-19 18:00:00	1.755
2008-12-19 19:00:00	1.949
2008-12-19 20:00:00	2.123
2008-12-19 21:00:00	2.196
2008-12-19 22:00:00	2.251
2008-12-19 23:00:00	2.244
2008-12-20	2.14
2008-12-20 01:00:00	2.002
2008-12-20 02:00:00	1.799
2008-12-20 03:00:00	1.673
2008-12-20 04:00:00	1.583
2008-12-20 05:00:00	1.672
2008-12-20 06:00:00	1.74
2008-12-20 07:00:00	1.836
2008-12-20 08:00:00	1.911
2008-12-20 09:00:00	2.005
2008-12-20 10:00:00	2.019
2008-12-20 11:00:00	1.983
2008-12-20 12:00:00	1.938
2008-12-20 13:00:00	1.802
2008-12-20 14:00:00	1.558
2008-12-20 15:00:00	1.565
2008-12-20 16:00:00	1.566
2008-12-20 17:00:00	1.58
2008-12-20 18:00:00	1.667
2008-12-20 19:00:00	1.81
2008-12-20 20:00:00	1.956
2008-12-20 21:00:00	2.118
2008-12-20 22:00:00	2.208
2008-12-20 23:00:00	2.209
2008-12-21	2.192
2008-12-21 01:00:00	2.112
2008-12-21 02:00:00	1.977
2008-12-21 03:00:00	1.737
2008-12-21 04:00:00	1.625
2008-12-21 05:00:00	1.575
2008-12-21 06:00:00	1.568
2008-12-21 07:00:00	1.595
2008-12-21 08:00:00	1.741
2008-12-21 09:00:00	1.839
2008-12-21 10:00:00	1.906
2008-12-21 11:00:00	1.939
2008-12-21 12:00:00	1.952
2008-12-21 13:00:00	1.908
2008-12-21 14:00:00	1.849
2008-12-21 15:00:00	1.68
2008-12-21 16:00:00	1.655
2008-12-21 17:00:00	1.54
2008-12-21 18:00:00	1.642
2008-12-21 19:00:00	1.754
2008-12-21 20:00:00	1.808
2008-12-21 21:00:00	1.979
2008-12-21 22:00:00	2.065
2008-12-21 23:00:00	2.144
2008-12-22	2.133
2008-12-22 01:00:00	2.095
2008-12-22 02:00:00	1.972
2008-12-22 03:00:00	1.779
2008-12-22 04:00:00	1.584
2008-12-22 05:00:00	1.429
2008-12-22 06:00:00	1.429
2008-12-22 07:00:00	1.426
2008-12-22 08:00:00	1.472
2008-12-22 09:00:00	1.583
2008-12-22 10:00:00	1.758
2008-12-22 11:00:00	1.815
2008-12-22 12:00:00	1.848
2008-12-22 13:00:00	1.837
2008-12-22 14:00:00	1.768
2008-12-22 15:00:00	1.816
2008-12-22 16:00:00	1.65
2008-12-22 17:00:00	1.553
2008-12-22 18:00:00	1.51
2008-12-22 19:00:00	1.478
2008-12-22 20:00:00	1.586
2008-12-22 21:00:00	1.721
2008-12-22 22:00:00	1.866
2008-12-22 23:00:00	2.001
2008-12-23	2.101
2008-12-23 01:00:00	2.141
2008-12-23 02:00:00	2.138
2008-12-23 03:00:00	1.89
2008-12-23 04:00:00	1.804
2008-12-23 05:00:00	1.545
2008-12-23 06:00:00	1.408
2008-12-23 07:00:00	1.334
2008-12-23 08:00:00	1.343
2008-12-23 09:00:00	1.572
2008-12-23 10:00:00	1.571
2008-12-23 11:00:00	1.693
2008-12-23 12:00:00	1.798
2008-12-23 13:00:00	1.957
2008-12-23 14:00:00	1.965
2008-12-23 15:00:00	1.907
2008-12-23 16:00:00	1.802
2008-12-23 17:00:00	1.652
2008-12-23 18:00:00	1.588
2008-12-23 19:00:00	1.568
2008-12-23 20:00:00	1.548
2008-12-23 21:00:00	1.671
2008-12-23 22:00:00	1.782
2008-12-23 23:00:00	1.907
2008-12-24	2.078
2008-12-24 01:00:00	2.113
2008-12-24 02:00:00	2.097
2008-12-24 03:00:00	2.071
2008-12-24 04:00:00	1.892
2008-12-24 05:00:00	1.65
2008-12-24 06:00:00	1.522
2008-12-24 07:00:00	1.374
2008-12-24 08:00:00	1.311
2008-12-24 09:00:00	1.341
2008-12-24 10:00:00	1.445
2008-12-24 11:00:00	1.615
2008-12-24 12:00:00	1.785
2008-12-24 13:00:00	1.933
2008-12-24 14:00:00	1.977
2008-12-24 15:00:00	2.019
2008-12-24 16:00:00	1.941
2008-12-24 17:00:00	1.801
2008-12-24 18:00:00	1.686
2008-12-24 19:00:00	1.582
2008-12-24 20:00:00	1.549
2008-12-24 21:00:00	1.586
2008-12-24 22:00:00	1.685
2008-12-24 23:00:00	1.817
2008-12-25	2.007
2008-12-25 01:00:00	2.197
2008-12-25 02:00:00	2.184
2008-12-25 03:00:00	2.132
2008-12-25 04:00:00	1.99
2008-12-25 05:00:00	1.863
2008-12-25 06:00:00	1.535
2008-12-25 07:00:00	1.374
2008-12-25 08:00:00	1.292
2008-12-25 09:00:00	1.268
2008-12-25 10:00:00	1.347
2008-12-25 11:00:00	1.501
2008-12-25 12:00:00	1.67
2008-12-25 13:00:00	1.799
2008-12-25 14:00:00	1.983
2008-12-25 15:00:00	2.041
2008-12-25 16:00:00	1.948
2008-12-25 17:00:00	1.901
2008-12-25 18:00:00	1.795
2008-12-25 19:00:00	1.624
2008-12-25 20:00:00	1.514
2008-12-25 21:00:00	1.491
2008-12-25 22:00:00	1.555
2008-12-25 23:00:00	1.656
2008-12-26	1.884
2008-12-26 01:00:00	2.101
2008-12-26 02:00:00	2.162
2008-12-26 03:00:00	2.135
2008-12-26 04:00:00	2.196
2008-12-26 05:00:00	1.971
2008-12-26 06:00:00	1.807
2008-12-26 07:00:00	1.412
2008-12-26 08:00:00	1.244
2008-12-26 09:00:00	1.151
2008-12-26 10:00:00	1.199
2008-12-26 11:00:00	1.356
2008-12-26 12:00:00	1.615
2008-12-26 13:00:00	1.788
2008-12-26 14:00:00	1.962
2008-12-26 15:00:00	2.054
2008-12-26 16:00:00	2.115
2008-12-26 17:00:00	2.054
2008-12-26 18:00:00	1.929
2008-12-26 19:00:00	1.737
2008-12-26 20:00:00	1.574
2008-12-26 21:00:00	1.493
2008-12-26 22:00:00	1.542
2008-12-26 23:00:00	1.634
2008-12-27	1.826
2008-12-27 01:00:00	2.009
2008-12-27 02:00:00	2.147
2008-12-27 03:00:00	2.179
2008-12-27 04:00:00	2.23
2008-12-27 05:00:00	2.113
2008-12-27 06:00:00	1.922
2008-12-27 07:00:00	1.609
2008-12-27 08:00:00	1.354
2008-12-27 09:00:00	1.203
2008-12-27 10:00:00	1.163
2008-12-27 11:00:00	1.27
2008-12-27 12:00:00	1.471
2008-12-27 13:00:00	1.715
2008-12-27 14:00:00	1.941
2008-12-27 15:00:00	2.118
2008-12-27 16:00:00	2.175
2008-12-27 17:00:00	2.179
2008-12-27 18:00:00	2.02
2008-12-27 19:00:00	1.841
2008-12-27 20:00:00	1.692
2008-12-27 21:00:00	1.531
2008-12-27 22:00:00	1.433
2008-12-27 23:00:00	1.526
2008-12-28	1.707
2008-12-28 01:00:00	1.922
2008-12-28 02:00:00	2.115
2008-12-28 03:00:00	2.198
2008-12-28 04:00:00	2.246
2008-12-28 05:00:00	2.16
2008-12-28 06:00:00	2.07
2008-12-28 07:00:00	1.796
2008-12-28 08:00:00	1.525
2008-12-28 09:00:00	1.304
2008-12-28 10:00:00	1.173
2008-12-28 11:00:00	1.148
2008-12-28 12:00:00	1.289
2008-12-28 13:00:00	1.517
2008-12-28 14:00:00	1.756
2008-12-28 15:00:00	1.955
2008-12-28 16:00:00	2.144
2008-12-28 17:00:00	2.217
2008-12-28 18:00:00	2.169
2008-12-28 19:00:00	1.967
2008-12-28 20:00:00	1.76
2008-12-28 21:00:00	1.591
2008-12-28 22:00:00	1.466
2008-12-28 23:00:00	1.449
2008-12-29	1.539
2008-12-29 01:00:00	1.749
2008-12-29 02:00:00	1.977
2008-12-29 03:00:00	2.096
2008-12-29 04:00:00	2.249
2008-12-29 05:00:00	2.246
2008-12-29 06:00:00	2.137
2008-12-29 07:00:00	1.923
2008-12-29 08:00:00	1.644
2008-12-29 09:00:00	1.369
2008-12-29 10:00:00	1.174
2008-12-29 11:00:00	1.074
2008-12-29 12:00:00	1.197
2008-12-29 13:00:00	1.235
2008-12-29 14:00:00	1.593
2008-12-29 15:00:00	1.871
2008-12-29 16:00:00	2.094
2008-12-29 17:00:00	2.185
2008-12-30 08:00:00	1.763
2008-12-30 09:00:00	1.451
2008-12-30 10:00:00	1.234
2008-12-30 11:00:00	1.172
2008-12-30 12:00:00	1.11
2008-12-30 13:00:00	1.297
2008-12-30 14:00:00	1.412
2008-12-30 15:00:00	1.719
2008-12-30 16:00:00	2.016
2008-12-30 17:00:00	2.157
2008-12-30 18:00:00	2.09
2008-12-30 19:00:00	2.181
2008-12-31 09:00:00	1.656
2008-12-31 10:00:00	1.412
2008-12-31 11:00:00	1.237
2008-12-31 12:00:00	1.135
2008-12-31 13:00:00	1.213
2008-12-31 14:00:00	1.389
2008-12-31 15:00:00	1.635
2008-12-31 16:00:00	1.885
2008-12-31 17:00:00	2.077
2008-12-31 18:00:00	2.191
2008-12-31 19:00:00	2.216
2008-12-31 20:00:00	2.144
2008-12-31 21:00:00	1.985
2008-12-31 22:00:00	1.783
2008-12-31 23:00:00	1.601
2009-01-01	1.497
2009-01-01 01:00:00	1.505
2009-01-01 02:00:00	1.616
2009-01-01 03:00:00	1.79
2009-01-01 04:00:00	1.97
2009-01-01 05:00:00	2.104
2009-01-01 06:00:00	2.164
2009-01-01 07:00:00	2.142
2009-01-01 08:00:00	2.027
2009-01-01 09:00:00	1.822
2009-01-01 10:00:00	1.535
2009-01-01 11:00:00	1.317
2009-01-01 12:00:00	1.196
2009-01-01 13:00:00	1.164
2009-01-01 14:00:00	1.268
2009-01-01 15:00:00	1.465
2009-01-01 16:00:00	1.747
2009-01-01 17:00:00	1.961
2009-01-01 18:00:00	2.077
2009-01-01 19:00:00	2.201
2009-01-01 20:00:00	2.163
2009-01-01 21:00:00	2.07
2009-01-01 22:00:00	1.894
2009-01-01 23:00:00	1.651
2009-01-02	1.501
2009-01-02 01:00:00	1.437
2009-01-02 02:00:00	1.505
2009-01-02 03:00:00	1.633
2009-01-02 04:00:00	1.804
2009-01-02 05:00:00	1.964
2009-01-02 06:00:00	2.068
2009-01-02 07:00:00	2.103
2009-01-02 08:00:00	2.064
2009-01-02 09:00:00	1.925
2009-01-02 10:00:00	1.756
2009-01-02 11:00:00	1.516
2009-01-02 12:00:00	1.327
2009-01-02 13:00:00	1.216
2009-01-02 14:00:00	1.295
2009-01-02 15:00:00	1.435
2009-01-02 16:00:00	1.644
2009-01-02 17:00:00	1.854
2009-01-02 18:00:00	2.047
2009-01-02 19:00:00	2.176
2009-01-02 20:00:00	2.218
2009-01-02 21:00:00	2.232
2009-01-02 22:00:00	2.051
2009-01-02 23:00:00	1.854
2009-01-03	1.675
2009-01-03 01:00:00	1.501
2009-01-03 02:00:00	1.418
2009-01-03 03:00:00	1.486
2009-01-03 04:00:00	1.657
2009-01-03 05:00:00	1.804
2009-01-03 06:00:00	1.886
2009-01-03 07:00:00	2.039
2009-01-03 08:00:00	2.077
2009-01-03 09:00:00	2.032
2009-01-03 10:00:00	1.863
2009-01-03 11:00:00	1.636
2009-01-03 12:00:00	1.479
2009-01-03 13:00:00	1.335
2009-01-03 14:00:00	1.289
2009-01-03 15:00:00	1.401
2009-01-03 16:00:00	1.535
2009-01-03 17:00:00	1.726
2009-01-03 18:00:00	1.908
2009-01-03 19:00:00	2.051
2009-01-03 20:00:00	2.161
2009-01-03 21:00:00	2.187
2009-01-03 22:00:00	2.172
2009-01-03 23:00:00	2.013
2009-01-04	1.824
2009-01-04 01:00:00	1.636
2009-01-04 02:00:00	1.514
2009-01-04 03:00:00	1.487
2009-01-04 04:00:00	1.541
2009-01-04 05:00:00	1.655
2009-01-04 06:00:00	1.791
2009-01-04 07:00:00	1.908
2009-01-04 08:00:00	1.978
2009-01-04 09:00:00	1.996
2009-01-04 10:00:00	1.952
2009-01-04 11:00:00	1.786
2009-01-04 12:00:00	1.614
2009-01-04 13:00:00	1.478
2009-01-04 14:00:00	1.381
2009-01-04 15:00:00	1.346
2009-01-04 16:00:00	1.417
2009-01-05 10:00:00	1.91
2009-01-05 11:00:00	1.879
2009-01-05 12:00:00	1.775
2009-01-05 13:00:00	1.643
2009-01-05 14:00:00	1.492
2009-01-05 15:00:00	1.385
2009-01-05 16:00:00	1.381
2009-01-05 17:00:00	1.49
2009-01-05 18:00:00	1.627
2009-01-06 09:00:00	1.687
2009-01-06 10:00:00	1.788
2009-01-06 11:00:00	1.846
2009-01-06 12:00:00	1.851
2009-01-06 13:00:00	1.818
2009-01-06 14:00:00	1.698
2009-01-06 15:00:00	1.563
2009-01-06 16:00:00	1.455
2009-01-06 17:00:00	1.42
2009-01-06 18:00:00	1.463
2009-01-06 19:00:00	1.567
2009-01-06 20:00:00	1.743
2009-01-07 09:00:00	1.494
2009-01-07 10:00:00	1.64
2009-01-07 11:00:00	1.778
2009-01-07 12:00:00	1.856
2009-01-07 13:00:00	1.907
2009-01-07 14:00:00	1.869
2009-01-07 15:00:00	1.724
2009-01-07 16:00:00	1.569
2009-01-08 11:00:00	1.574
2009-01-08 12:00:00	1.788
2009-01-08 13:00:00	1.923
2009-01-08 14:00:00	1.999
2009-01-08 15:00:00	1.905
2009-01-08 16:00:00	1.798
2009-01-09 09:00:00	1.023
2009-01-09 10:00:00	1.152
2009-01-09 11:00:00	1.348
2009-01-09 12:00:00	1.613
2009-01-09 13:00:00	1.852
2009-01-09 14:00:00	2.025
2009-01-09 15:00:00	2.089
2009-01-09 16:00:00	2.026
2009-01-09 17:00:00	1.859
2009-01-09 18:00:00	1.644
2009-01-09 19:00:00	1.391
2009-01-10 11:00:00	1.105
2009-01-10 12:00:00	1.408
2009-01-10 13:00:00	1.694
2009-01-10 14:00:00	1.942
2009-01-10 15:00:00	2.153
2009-01-10 16:00:00	2.195
2009-01-10 17:00:00	2.098
2009-01-10 18:00:00	1.868
2009-01-10 19:00:00	1.576
2009-01-10 20:00:00	1.291
2009-01-10 21:00:00	1.171
2009-01-10 22:00:00	1.197
2009-01-10 23:00:00	1.33
2009-01-11	1.593
2009-01-11 01:00:00	1.87
2009-01-11 02:00:00	2.11
2009-01-11 03:00:00	2.28
2009-01-11 04:00:00	2.343
2009-01-11 05:00:00	2.259
2009-01-11 06:00:00	1.936
2009-01-11 07:00:00	1.522
2009-01-11 08:00:00	1.172
2009-01-11 09:00:00	0.927
2009-01-11 10:00:00	0.837
2009-01-11 11:00:00	0.919
2009-01-11 12:00:00	1.171
2009-01-11 13:00:00	1.492
2009-01-11 14:00:00	1.796
2009-01-11 15:00:00	2.082
2009-01-11 16:00:00	2.199
2009-01-11 17:00:00	2.194
2009-01-11 18:00:00	2.146
2009-01-11 19:00:00	1.903
2009-01-11 20:00:00	1.543
2009-01-11 21:00:00	1.237
2009-01-11 22:00:00	1.183
2009-01-11 23:00:00	1.203
2009-01-12	1.366
2009-01-12 01:00:00	1.616
2009-01-12 02:00:00	1.878
2009-01-12 03:00:00	2.127
2009-01-12 04:00:00	2.292
2009-01-12 05:00:00	2.338
2009-01-12 06:00:00	2.16
2009-01-12 07:00:00	1.83
2009-01-12 08:00:00	1.314
2009-01-12 09:00:00	1.116
2009-01-12 10:00:00	0.893
2009-01-12 11:00:00	0.833
2009-01-12 12:00:00	0.955
2009-01-12 13:00:00	1.215
2009-01-12 14:00:00	1.52
2009-01-12 15:00:00	1.801
2009-01-12 16:00:00	2.025
2009-01-12 17:00:00	2.162
2009-01-12 18:00:00	2.166
2009-01-12 19:00:00	2.003
2009-01-12 20:00:00	1.708
2009-01-12 21:00:00	1.383
2009-01-12 22:00:00	1.286
2009-01-12 23:00:00	1.197
2009-01-13	1.234
2009-01-13 01:00:00	1.41
2009-01-13 02:00:00	1.671
2009-01-13 03:00:00	1.927
2009-01-13 04:00:00	2.123
2009-01-13 05:00:00	2.23
2009-01-13 06:00:00	2.215
2009-01-13 07:00:00	2.041
2009-01-13 08:00:00	1.726
2009-01-13 09:00:00	1.357
2009-01-13 10:00:00	1.054
2009-01-13 11:00:00	0.888
2009-01-13 12:00:00	0.897
2009-01-13 13:00:00	1.079
2009-01-13 14:00:00	1.334
2009-01-13 15:00:00	1.679
2009-01-13 16:00:00	1.986
2009-01-13 17:00:00	2.232
2009-01-13 18:00:00	2.317
2009-01-13 19:00:00	2.261
2009-01-13 20:00:00	2.192
2009-01-13 21:00:00	1.851
2009-01-13 22:00:00	1.394
2009-01-13 23:00:00	1.322
2009-01-14	1.272
2009-01-14 01:00:00	1.357
2009-01-14 02:00:00	1.564
2009-01-14 03:00:00	1.799
2009-01-14 04:00:00	2.091
2009-01-14 05:00:00	2.23
2009-01-14 06:00:00	2.281
2009-01-14 07:00:00	2.27
2009-01-14 08:00:00	2.096
2009-01-14 09:00:00	1.763
2009-01-14 10:00:00	1.409
2009-01-14 11:00:00	1.141
2009-01-14 12:00:00	1.02
2009-01-14 13:00:00	1.039
2009-01-14 14:00:00	1.274
2009-01-14 15:00:00	1.584
2009-01-14 16:00:00	1.935
2009-01-14 17:00:00	2.145
2009-01-14 18:00:00	2.331
2009-01-14 19:00:00	2.42
2009-01-14 20:00:00	2.375
2009-01-14 21:00:00	2.138
2009-01-14 22:00:00	1.817
2009-01-14 23:00:00	1.588
2009-01-15	1.372
2009-01-15 01:00:00	1.344
2009-01-15 02:00:00	1.465
2009-01-15 03:00:00	1.61
2009-01-15 04:00:00	1.86
2009-01-15 05:00:00	2.072
2009-01-15 06:00:00	2.22
2009-01-15 07:00:00	2.223
2009-01-15 08:00:00	2.15
2009-01-15 09:00:00	1.95
2009-01-15 10:00:00	1.653
2009-01-15 11:00:00	1.371
2009-01-15 12:00:00	1.188
2009-01-15 13:00:00	1.148
2009-01-15 14:00:00	1.253
2009-01-15 15:00:00	1.471
2009-01-15 16:00:00	1.73
2009-01-15 17:00:00	1.966
2009-01-15 18:00:00	2.156
2009-01-15 19:00:00	2.286
2009-01-15 20:00:00	2.324
2009-01-15 21:00:00	2.261
2009-01-15 22:00:00	2.057
2009-01-15 23:00:00	1.782
2009-01-16	1.531
2009-01-16 01:00:00	1.392
2009-01-16 02:00:00	1.371
2009-01-16 03:00:00	1.497
2009-01-16 04:00:00	1.672
2009-01-16 05:00:00	1.854
2009-01-16 06:00:00	1.995
2009-01-16 07:00:00	2.078
2009-01-16 08:00:00	2.086
2009-01-16 09:00:00	1.996
2009-01-16 10:00:00	1.843
2009-01-16 11:00:00	1.577
2009-01-16 12:00:00	1.344
2009-01-16 13:00:00	1.214
2009-01-16 14:00:00	1.232
2009-01-16 15:00:00	1.379
2009-01-16 16:00:00	1.593
2009-01-16 17:00:00	1.845
2009-01-16 18:00:00	2.019
2009-01-16 19:00:00	2.16
2009-01-16 20:00:00	2.256
2009-01-16 21:00:00	2.23
2009-01-16 22:00:00	2.124
2009-01-16 23:00:00	1.942
2009-01-17	1.701
2009-01-17 01:00:00	1.478
2009-01-17 02:00:00	1.398
2009-01-17 03:00:00	1.429
2009-01-17 04:00:00	1.512
2009-01-17 05:00:00	1.683
2009-01-17 06:00:00	1.848
2009-01-17 07:00:00	1.945
2009-01-17 08:00:00	1.993
2009-01-17 09:00:00	1.978
2009-01-17 10:00:00	1.874
2009-01-17 11:00:00	1.704
2009-01-17 12:00:00	1.51
2009-01-17 13:00:00	1.366
2009-01-17 14:00:00	1.308
2009-01-17 15:00:00	1.356
2009-01-17 16:00:00	1.524
2009-01-17 17:00:00	1.695
2009-01-17 18:00:00	1.863
2009-01-17 19:00:00	2.022
2009-01-17 20:00:00	2.102
2009-01-17 21:00:00	2.148
2009-01-17 22:00:00	2.131
2009-01-17 23:00:00	2.038
2009-01-18	1.855
2009-01-18 01:00:00	1.625
2009-01-18 02:00:00	1.496
2009-01-18 03:00:00	1.417
2009-01-18 04:00:00	1.451
2009-01-18 05:00:00	1.546
2009-01-18 06:00:00	1.675
2009-01-18 07:00:00	1.747
2009-01-18 08:00:00	1.83
2009-01-18 09:00:00	1.875
2009-01-18 10:00:00	1.878
2009-01-18 11:00:00	1.797
2009-01-18 12:00:00	1.649
2009-01-18 13:00:00	1.562
2009-01-18 14:00:00	1.459
2009-01-18 15:00:00	1.424
2009-01-18 16:00:00	1.513
2009-01-18 17:00:00	1.608
2009-01-18 18:00:00	1.728
2009-01-18 19:00:00	1.852
2009-01-18 20:00:00	1.955
2009-01-18 21:00:00	2.034
2009-01-18 22:00:00	2.068
2009-01-18 23:00:00	2.027
2009-01-19	1.943
2009-01-19 01:00:00	1.792
2009-01-19 02:00:00	1.596
2009-01-19 03:00:00	1.433
2009-01-19 04:00:00	1.406
2009-01-19 05:00:00	1.408
2009-01-19 06:00:00	1.465
2009-01-19 07:00:00	1.564
2009-01-19 08:00:00	1.661
2009-01-19 09:00:00	1.74
2009-01-19 10:00:00	1.753
2009-01-19 11:00:00	1.788
2009-01-19 12:00:00	1.721
2009-01-19 13:00:00	1.656
2009-01-19 14:00:00	1.554
2009-01-19 15:00:00	1.538
2009-01-19 16:00:00	1.513
2009-01-19 17:00:00	1.564
2009-01-19 18:00:00	1.647
2009-01-19 19:00:00	1.747
2009-01-19 20:00:00	1.801
2009-01-19 21:00:00	1.908
2009-01-19 22:00:00	1.998
2009-01-19 23:00:00	1.992
2009-01-20	1.94
2009-01-20 01:00:00	1.866
2009-01-20 02:00:00	1.701
2009-01-20 03:00:00	1.573
2009-01-20 04:00:00	1.467
2009-01-20 05:00:00	1.399
2009-01-20 06:00:00	1.387
2009-01-20 07:00:00	1.43
2009-01-20 08:00:00	1.591
2009-01-20 09:00:00	1.644
2009-01-20 10:00:00	1.69
2009-01-20 11:00:00	1.718
2009-01-20 12:00:00	1.788
2009-01-20 13:00:00	1.825
2009-01-20 14:00:00	1.716
2009-01-20 15:00:00	1.628
2009-01-20 16:00:00	1.538
2009-01-20 17:00:00	1.569
2009-01-20 18:00:00	1.592
2009-01-20 19:00:00	1.618
2009-01-20 20:00:00	1.733
2009-01-20 21:00:00	1.799
2009-01-20 22:00:00	1.84
2009-01-20 23:00:00	1.931
2009-01-21	1.984
2009-01-21 01:00:00	1.942
2009-01-21 02:00:00	1.842
2009-01-21 03:00:00	1.728
2009-01-21 04:00:00	1.529
2009-01-21 05:00:00	1.407
2009-01-21 06:00:00	1.385
2009-01-21 07:00:00	1.292
2009-01-21 08:00:00	1.341
2009-01-21 09:00:00	1.519
2009-01-21 10:00:00	1.56
2009-01-21 11:00:00	1.675
2009-01-21 12:00:00	1.753
2009-01-21 13:00:00	1.796
2009-01-21 14:00:00	1.797
2009-01-21 15:00:00	1.748
2009-01-21 16:00:00	1.657
2009-01-21 17:00:00	1.588
2009-01-21 18:00:00	1.558
2009-01-21 19:00:00	1.515
2009-01-21 20:00:00	1.531
2009-01-21 21:00:00	1.699
2009-01-21 22:00:00	1.737
2009-01-21 23:00:00	1.854
2009-01-22	1.967
2009-01-22 01:00:00	1.996
2009-01-22 02:00:00	1.984
2009-01-22 03:00:00	1.78
2009-01-22 04:00:00	1.698
2009-01-22 05:00:00	1.478
2009-01-22 06:00:00	1.288
2009-01-22 07:00:00	1.28
2009-01-22 08:00:00	1.211
2009-01-22 09:00:00	1.301
2009-01-22 10:00:00	1.437
2009-01-22 11:00:00	1.606
2009-01-22 12:00:00	1.692
2009-01-22 13:00:00	1.819
2009-01-22 14:00:00	1.904
2009-01-22 15:00:00	1.923
2009-01-22 16:00:00	1.845
2009-01-22 17:00:00	1.712
2009-01-22 18:00:00	1.581
2009-01-22 19:00:00	1.482
2009-01-22 20:00:00	1.506
2009-01-22 21:00:00	1.587
2009-01-22 22:00:00	1.679
2009-01-22 23:00:00	1.82
2009-01-23	1.95
2009-01-23 01:00:00	1.994
2009-01-23 02:00:00	1.998
2009-01-23 03:00:00	1.951
2009-01-23 04:00:00	1.871
2009-01-23 05:00:00	1.663
2009-01-23 06:00:00	1.398
2009-01-23 07:00:00	1.282
2009-01-23 08:00:00	1.13
2009-01-23 09:00:00	1.16
2009-01-23 10:00:00	1.279
2009-01-23 11:00:00	1.458
2009-01-23 12:00:00	1.666
2009-01-23 13:00:00	1.761
2009-01-23 14:00:00	1.934
2009-01-23 15:00:00	1.952
2009-01-23 16:00:00	1.941
2009-01-23 17:00:00	1.785
2009-01-23 18:00:00	1.662
2009-01-23 19:00:00	1.52
2009-01-23 20:00:00	1.451
2009-01-23 21:00:00	1.464
2009-01-23 22:00:00	1.551
2009-01-23 23:00:00	1.69
2009-01-24	1.847
2009-01-24 01:00:00	1.976
2009-01-24 02:00:00	2.028
2009-01-24 03:00:00	2.028
2009-01-24 04:00:00	1.97
2009-01-24 05:00:00	1.784
2009-01-24 06:00:00	1.507
2009-01-24 07:00:00	1.296
2009-01-24 08:00:00	1.121
2009-01-24 09:00:00	1.084
2009-01-24 10:00:00	1.129
2009-01-24 11:00:00	1.204
2009-01-24 12:00:00	1.503
2009-01-24 13:00:00	1.77
2009-01-24 14:00:00	1.869
2009-01-24 15:00:00	1.957
2009-01-24 16:00:00	1.949
2009-01-24 17:00:00	1.862
2009-01-24 18:00:00	1.734
2009-01-25 09:00:00	1.001
2009-01-25 10:00:00	1.015
2009-01-25 11:00:00	1.159
2009-01-25 12:00:00	1.382
2009-01-25 13:00:00	1.657
2009-01-25 14:00:00	1.866
2009-01-25 15:00:00	2.004
2009-01-25 16:00:00	2.05
2009-01-26 09:00:00	1.117
2009-01-26 10:00:00	0.978
2009-01-26 11:00:00	1.061
2009-01-26 12:00:00	1.255
2009-01-26 13:00:00	1.542
2009-01-26 14:00:00	1.74
2009-01-26 15:00:00	1.963
2009-01-26 16:00:00	2.074
2009-01-26 17:00:00	2.152
2009-01-26 18:00:00	2.019
2009-01-26 19:00:00	1.875
2009-01-26 20:00:00	1.632
2009-01-27 09:00:00	1.233
2009-01-27 10:00:00	1.065
2009-01-27 11:00:00	1.057
2009-01-27 12:00:00	1.171
2009-01-27 13:00:00	1.448
2009-01-27 14:00:00	1.733
2009-01-27 15:00:00	1.991
2009-01-27 16:00:00	2.17
2009-01-27 17:00:00	2.226
2009-01-27 18:00:00	2.173
2009-01-27 19:00:00	2.024
2009-01-27 20:00:00	1.794
2009-01-27 21:00:00	1.554
2009-01-27 22:00:00	1.406
2009-01-27 23:00:00	1.356
2009-01-28	1.442
2009-01-28 01:00:00	1.633
2009-01-28 02:00:00	1.875
2009-01-28 03:00:00	2.072
2009-01-28 04:00:00	2.238
2009-01-28 05:00:00	2.283
2009-01-28 06:00:00	2.214
2009-01-28 07:00:00	2.049
2009-01-28 08:00:00	1.742
2009-01-28 09:00:00	1.458
2009-01-28 10:00:00	1.173
2009-01-28 11:00:00	1.087
2009-01-28 12:00:00	1.154
2009-01-28 13:00:00	1.359
2009-01-28 14:00:00	1.637
2009-01-28 15:00:00	1.935
2009-01-28 16:00:00	2.14
2009-01-28 17:00:00	2.246
2009-01-28 18:00:00	2.279
2009-01-28 19:00:00	2.191
2009-01-28 20:00:00	2.015
2009-01-28 21:00:00	1.727
2009-01-28 22:00:00	1.498
2009-01-28 23:00:00	1.338
2009-01-29	1.347
2009-01-29 01:00:00	1.485
2009-01-29 02:00:00	1.708
2009-01-29 03:00:00	1.987
2009-01-29 04:00:00	2.162
2009-01-29 05:00:00	2.271
2009-01-29 06:00:00	2.262
2009-01-29 07:00:00	2.157
2009-01-29 08:00:00	1.919
2009-01-29 09:00:00	1.616
2009-01-29 10:00:00	1.277
2009-01-29 11:00:00	1.105
2009-01-29 12:00:00	1.044
2009-01-29 13:00:00	1.226
2009-01-29 14:00:00	1.488
2009-01-29 15:00:00	1.791
2009-01-29 16:00:00	2.053
2009-01-29 17:00:00	2.242
2009-01-29 18:00:00	2.316
2009-01-29 19:00:00	2.287
2009-01-29 20:00:00	2.139
2009-01-29 21:00:00	1.878
2009-01-29 22:00:00	1.605
2009-01-29 23:00:00	1.382
2009-01-30	1.313
2009-01-30 01:00:00	1.38
2009-01-30 02:00:00	1.558
2009-01-30 03:00:00	1.792
2009-01-30 04:00:00	2.006
2009-01-30 05:00:00	2.151
2009-01-30 06:00:00	2.21
2009-01-30 07:00:00	2.172
2009-01-30 08:00:00	2.02
2009-01-30 09:00:00	1.771
2009-01-30 10:00:00	1.46
2009-01-30 11:00:00	1.205
2009-01-30 12:00:00	1.055
2009-01-30 13:00:00	1.132
2009-01-30 14:00:00	1.305
2009-01-30 15:00:00	1.698
2009-01-30 16:00:00	1.957
2009-01-30 17:00:00	2.145
2009-01-30 18:00:00	2.182
2009-01-30 19:00:00	2.345
2009-01-30 20:00:00	2.27
2009-01-30 21:00:00	2.037
2009-01-30 22:00:00	1.76
2009-01-30 23:00:00	1.539
2009-01-31	1.361
2009-01-31 01:00:00	1.291
2009-01-31 02:00:00	1.397
2009-01-31 03:00:00	1.63
2009-01-31 04:00:00	1.875
2009-01-31 05:00:00	2.071
2009-01-31 06:00:00	2.14
2009-01-31 07:00:00	2.235
2009-01-31 08:00:00	2.106
2009-01-31 09:00:00	1.849
2009-01-31 10:00:00	1.631
2009-01-31 11:00:00	1.359
2009-01-31 12:00:00	1.195
2009-01-31 13:00:00	1.228
2009-01-31 14:00:00	1.335
2009-01-31 15:00:00	1.528
2009-01-31 16:00:00	1.768
2009-01-31 17:00:00	2.029
2009-01-31 18:00:00	2.22
2009-01-31 19:00:00	2.275
2009-01-31 20:00:00	2.248
2009-01-31 21:00:00	2.118
2009-01-31 22:00:00	1.892
2009-01-31 23:00:00	1.634
2009-02-01	1.445
2009-02-01 01:00:00	1.351
2009-02-01 02:00:00	1.387
2009-02-01 03:00:00	1.524
2009-02-01 04:00:00	1.683
2009-02-01 05:00:00	1.85
2009-02-01 06:00:00	1.969
2009-02-01 07:00:00	2.112
2009-02-01 08:00:00	2.094
2009-02-01 09:00:00	1.998
2009-02-01 10:00:00	1.816
2009-02-01 11:00:00	1.585
2009-02-01 12:00:00	1.35
2009-02-01 13:00:00	1.212
2009-02-01 14:00:00	1.196
2009-02-01 15:00:00	1.29
2009-02-01 16:00:00	1.618
2009-02-01 17:00:00	1.97
2009-02-01 18:00:00	2.226
2009-02-01 19:00:00	2.28
2009-02-01 20:00:00	2.271
2009-02-01 21:00:00	2.184
2009-02-01 22:00:00	2.167
2009-02-01 23:00:00	1.81
2009-02-02	1.668
2009-02-02 01:00:00	1.357
2009-02-02 02:00:00	1.414
2009-02-02 03:00:00	1.406
2009-02-02 04:00:00	1.478
2009-02-02 05:00:00	1.609
2009-02-02 06:00:00	1.63
2009-02-02 07:00:00	1.884
2009-02-02 08:00:00	2.08
2009-02-02 09:00:00	2.074
2009-02-02 10:00:00	1.891
2009-02-02 11:00:00	1.8
2009-02-02 12:00:00	1.538
2009-02-02 13:00:00	1.372
2009-02-02 14:00:00	1.415
2009-02-02 15:00:00	1.448
2009-02-02 16:00:00	1.567
2009-02-02 17:00:00	1.745
2009-02-02 18:00:00	1.93
2009-02-02 19:00:00	2.08
2009-02-02 20:00:00	2.186
2009-02-02 21:00:00	2.235
2009-02-02 22:00:00	2.214
2009-02-02 23:00:00	2.065
2009-02-03	1.843
2009-02-03 01:00:00	1.636
2009-02-03 02:00:00	1.455
2009-02-03 03:00:00	1.438
2009-02-03 04:00:00	1.404
2009-02-03 05:00:00	1.533
2009-02-03 06:00:00	1.59
2009-02-03 07:00:00	1.791
2009-02-03 08:00:00	1.894
2009-02-03 09:00:00	1.962
2009-02-03 10:00:00	1.955
2009-02-03 11:00:00	1.888
2009-02-03 12:00:00	1.811
2009-02-03 13:00:00	1.661
2009-02-03 14:00:00	1.536
2009-02-03 15:00:00	1.389
2009-02-03 16:00:00	1.503
2009-02-03 17:00:00	1.618
2009-02-03 18:00:00	1.788
2009-02-03 19:00:00	1.936
2009-02-03 20:00:00	2.051
2009-02-03 21:00:00	2.154
2009-02-03 22:00:00	2.21
2009-02-03 23:00:00	2.156
2009-02-04	2.02
2009-02-04 01:00:00	1.834
2009-02-04 02:00:00	1.656
2009-02-04 03:00:00	1.494
2009-02-04 04:00:00	1.4
2009-02-04 05:00:00	1.406
2009-02-04 06:00:00	1.475
2009-02-04 07:00:00	1.578
2009-02-04 08:00:00	1.697
2009-02-04 09:00:00	1.881
2009-02-04 10:00:00	1.939
2009-02-04 11:00:00	1.935
2009-02-04 12:00:00	1.921
2009-02-04 13:00:00	1.87
2009-02-04 14:00:00	1.756
2009-02-04 15:00:00	1.646
2009-02-04 16:00:00	1.552
2009-02-04 17:00:00	1.533
2009-02-04 18:00:00	1.577
2009-02-04 19:00:00	1.735
2009-02-04 20:00:00	1.914
2009-02-04 21:00:00	2.019
2009-02-04 22:00:00	2.174
2009-02-04 23:00:00	2.237
2009-02-05	2.209
2009-02-05 01:00:00	2.141
2009-02-05 02:00:00	1.929
2009-02-05 03:00:00	1.73
2009-02-05 04:00:00	1.551
2009-02-05 05:00:00	1.431
2009-02-05 06:00:00	1.384
2009-02-05 07:00:00	1.394
2009-02-05 08:00:00	1.506
2009-02-05 09:00:00	1.647
2009-02-05 10:00:00	1.8
2009-02-05 11:00:00	1.938
2009-02-05 12:00:00	2.046
2009-02-05 13:00:00	2.046
2009-02-05 14:00:00	1.993
2009-02-05 15:00:00	1.839
2009-02-05 16:00:00	1.701
2009-02-05 17:00:00	1.625
2009-02-05 18:00:00	1.548
2009-02-05 19:00:00	1.615
2009-02-05 20:00:00	1.678
2009-02-05 21:00:00	1.852
2009-02-05 22:00:00	1.988
2009-02-05 23:00:00	2.156
2009-02-06	2.259
2009-02-06 01:00:00	2.243
2009-02-06 02:00:00	2.173
2009-02-06 03:00:00	1.993
2009-02-06 04:00:00	1.778
2009-02-06 05:00:00	1.526
2009-02-06 06:00:00	1.364
2009-02-06 07:00:00	1.287
2009-02-06 08:00:00	1.308
2009-02-06 09:00:00	1.42
2009-02-06 10:00:00	1.553
2009-02-06 11:00:00	1.759
2009-02-06 12:00:00	1.953
2009-02-06 13:00:00	2.078
2009-02-06 14:00:00	2.128
2009-02-06 15:00:00	2.078
2009-02-06 16:00:00	1.936
2009-02-06 17:00:00	1.775
2009-02-06 18:00:00	1.584
2009-02-06 19:00:00	1.481
2009-02-06 20:00:00	1.524
2009-02-06 21:00:00	1.62
2009-02-06 22:00:00	1.763
2009-02-06 23:00:00	1.964
2009-02-07	2.153
2009-02-07 01:00:00	2.298
2009-02-07 02:00:00	2.307
2009-02-07 03:00:00	2.232
2009-02-07 04:00:00	2.021
2009-02-07 05:00:00	1.748
2009-02-07 06:00:00	1.473
2009-02-07 07:00:00	1.265
2009-02-07 08:00:00	1.154
2009-02-07 09:00:00	1.188
2009-02-07 10:00:00	1.341
2009-02-07 11:00:00	1.58
2009-02-07 12:00:00	1.833
2009-02-07 13:00:00	2.067
2009-02-07 14:00:00	2.213
2009-02-07 15:00:00	2.262
2009-02-07 16:00:00	2.147
2009-02-07 17:00:00	1.972
2009-02-07 18:00:00	1.772
2009-02-07 19:00:00	1.522
2009-02-07 20:00:00	1.398
2009-02-07 21:00:00	1.378
2009-02-07 22:00:00	1.523
2009-02-07 23:00:00	1.719
2009-02-08	1.979
2009-02-08 01:00:00	2.206
2009-02-08 02:00:00	2.323
2009-02-08 03:00:00	2.361
2009-02-08 04:00:00	2.255
2009-02-08 05:00:00	2.007
2009-02-08 06:00:00	1.652
2009-02-08 07:00:00	1.308
2009-02-08 08:00:00	1.135
2009-02-08 09:00:00	1.059
2009-02-08 10:00:00	1.077
2009-02-08 11:00:00	1.256
2009-02-08 12:00:00	1.542
2009-02-08 13:00:00	1.829
2009-02-08 14:00:00	2.08
2009-02-08 15:00:00	2.26
2009-02-08 16:00:00	2.323
2009-02-08 17:00:00	2.251
2009-02-08 18:00:00	1.952
2009-02-08 19:00:00	1.695
2009-02-08 20:00:00	1.486
2009-02-08 21:00:00	1.387
2009-02-08 22:00:00	1.318
2009-02-08 23:00:00	1.475
2009-02-09	1.723
2009-02-09 01:00:00	1.98
2009-02-09 02:00:00	2.193
2009-02-09 03:00:00	2.331
2009-02-09 04:00:00	2.356
2009-02-09 05:00:00	2.226
2009-02-09 06:00:00	1.943
2009-02-09 07:00:00	1.587
2009-02-09 08:00:00	1.261
2009-02-09 09:00:00	1.046
2009-02-09 10:00:00	0.989
2009-02-09 11:00:00	1.074
2009-02-09 12:00:00	1.342
2009-02-09 13:00:00	1.693
2009-02-09 14:00:00	2.051
2009-02-09 15:00:00	2.233
2009-02-09 16:00:00	2.392
2009-02-10 11:00:00	0.997
2009-02-10 12:00:00	1.197
2009-02-10 13:00:00	1.511
2009-02-10 14:00:00	1.87
2009-02-10 15:00:00	2.177
2009-02-10 16:00:00	2.42
2009-02-10 17:00:00	2.519
2009-02-10 18:00:00	2.465
2009-02-10 19:00:00	2.236
2009-02-10 20:00:00	1.889
2009-02-10 21:00:00	1.541
2009-02-10 22:00:00	1.299
2009-02-10 23:00:00	1.207
2009-02-11	1.312
2009-02-11 01:00:00	1.552
2009-02-11 02:00:00	1.866
2009-02-11 03:00:00	2.162
2009-02-11 04:00:00	2.341
2009-02-11 05:00:00	2.382
2009-02-11 06:00:00	2.388
2009-02-11 07:00:00	2.123
2009-02-11 08:00:00	1.724
2009-02-11 09:00:00	1.359
2009-02-11 10:00:00	1.088
2009-02-11 11:00:00	0.956
2009-02-11 12:00:00	1.06
2009-02-11 13:00:00	1.324
2009-02-11 14:00:00	1.667
2009-02-11 15:00:00	1.997
2009-02-11 16:00:00	2.272
2009-02-11 17:00:00	2.445
2009-02-11 18:00:00	2.506
2009-02-11 19:00:00	2.404
2009-02-11 20:00:00	2.131
2009-02-11 21:00:00	1.773
2009-02-11 22:00:00	1.451
2009-02-11 23:00:00	1.253
2009-02-12	1.237
2009-02-12 01:00:00	1.354
2009-02-12 02:00:00	1.62
2009-02-12 03:00:00	1.91
2009-02-12 04:00:00	2.166
2009-02-12 05:00:00	2.32
2009-02-12 06:00:00	2.373
2009-02-12 07:00:00	2.278
2009-02-12 08:00:00	2.019
2009-02-12 09:00:00	1.628
2009-02-12 10:00:00	1.295
2009-02-12 11:00:00	1.084
2009-02-12 12:00:00	1.034
2009-02-12 13:00:00	1.203
2009-02-12 14:00:00	1.489
2009-02-12 15:00:00	1.811
2009-02-12 16:00:00	2.098
2009-02-12 17:00:00	2.296
2009-02-12 18:00:00	2.414
2009-02-12 19:00:00	2.414
2009-02-12 20:00:00	2.24
2009-02-12 21:00:00	1.935
2009-02-12 22:00:00	1.588
2009-02-12 23:00:00	1.309
2009-02-13	1.196
2009-02-13 01:00:00	1.235
2009-02-13 02:00:00	1.406
2009-02-13 03:00:00	1.685
2009-02-13 04:00:00	1.957
2009-02-13 05:00:00	2.13
2009-02-13 06:00:00	2.224
2009-02-13 07:00:00	2.221
2009-02-13 08:00:00	2.09
2009-02-13 09:00:00	1.862
2009-02-13 10:00:00	1.515
2009-02-13 11:00:00	1.239
2009-02-13 12:00:00	1.098
2009-02-13 13:00:00	1.169
2009-02-13 14:00:00	1.376
2009-02-13 15:00:00	1.57
2009-02-13 16:00:00	1.889
2009-02-13 17:00:00	2.16
2009-02-13 18:00:00	2.25
2009-02-13 19:00:00	2.32
2009-02-13 20:00:00	2.271
2009-02-13 21:00:00	2.112
2009-02-13 22:00:00	1.763
2009-02-13 23:00:00	1.552
2009-02-14	1.359
2009-02-14 01:00:00	1.299
2009-02-14 02:00:00	1.368
2009-02-14 03:00:00	1.539
2009-02-14 04:00:00	1.745
2009-02-14 05:00:00	1.925
2009-02-14 06:00:00	2.045
2009-02-14 07:00:00	2.094
2009-02-14 08:00:00	2.052
2009-02-14 09:00:00	1.901
2009-02-14 10:00:00	1.683
2009-02-14 11:00:00	1.43
2009-02-14 12:00:00	1.256
2009-02-14 13:00:00	1.237
2009-02-14 14:00:00	1.315
2009-02-14 15:00:00	1.492
2009-02-15 10:00:00	1.832
2009-02-15 11:00:00	1.648
2009-02-15 12:00:00	1.483
2009-02-15 13:00:00	1.391
2009-02-15 14:00:00	1.407
2009-02-15 15:00:00	1.529
2009-02-15 16:00:00	1.711
2009-02-15 17:00:00	1.923
2009-02-15 18:00:00	2.095
2009-02-15 19:00:00	2.177
2009-02-15 20:00:00	2.192
2009-02-15 21:00:00	2.181
2009-02-15 22:00:00	2.074
2009-02-15 23:00:00	1.903
2009-02-16	1.702
2009-02-16 01:00:00	1.54
2009-02-16 02:00:00	1.464
2009-02-16 03:00:00	1.478
2009-02-16 04:00:00	1.559
2009-02-16 05:00:00	1.685
2009-02-16 06:00:00	1.81
2009-02-16 07:00:00	1.906
2009-02-16 08:00:00	1.96
2009-02-16 09:00:00	1.962
2009-02-16 10:00:00	1.925
2009-02-16 11:00:00	1.84
2009-02-16 12:00:00	1.735
2009-02-16 13:00:00	1.578
2009-02-16 14:00:00	1.482
2009-02-16 15:00:00	1.58
2009-02-16 16:00:00	1.602
2009-02-16 17:00:00	1.781
2009-02-16 18:00:00	1.952
2009-02-16 19:00:00	1.979
2009-02-16 20:00:00	2.085
2009-02-16 21:00:00	2.105
2009-02-16 22:00:00	2.099
2009-02-16 23:00:00	1.996
2009-02-17	1.855
2009-02-17 01:00:00	1.668
2009-02-17 02:00:00	1.517
2009-02-17 03:00:00	1.537
2009-02-17 04:00:00	1.497
2009-02-17 05:00:00	1.567
2009-02-17 06:00:00	1.67
2009-02-17 07:00:00	1.772
2009-02-17 08:00:00	1.847
2009-02-17 09:00:00	1.889
2009-02-17 10:00:00	1.892
2009-02-17 11:00:00	1.91
2009-02-17 12:00:00	1.791
2009-02-17 13:00:00	1.699
2009-02-17 14:00:00	1.593
2009-02-17 15:00:00	1.637
2009-02-17 16:00:00	1.655
2009-02-17 17:00:00	1.715
2009-02-17 18:00:00	1.795
2009-02-17 19:00:00	1.906
2009-02-17 20:00:00	2
2009-02-17 21:00:00	2.026
2009-02-17 22:00:00	2.076
2009-02-17 23:00:00	2.01
2009-02-18	1.913
2009-02-18 01:00:00	1.859
2009-02-18 02:00:00	1.688
2009-02-18 03:00:00	1.551
2009-02-18 04:00:00	1.516
2009-02-18 05:00:00	1.473
2009-02-18 06:00:00	1.544
[truncated: 424 more rows]

## Sheet: Los Angeles
Location: Los Angeles
Source:
Date Time (GMT)	Height(m)
2019-01-01 01:00:00	2.429
2019-01-01 02:00:00	2.469
2019-01-01 03:00:00	2.347
2019-01-01 04:00:00	2.245
2019-01-01 05:00:00	2.042
2019-01-01 06:00:00	1.901
2019-01-01 07:00:00	1.821
2019-01-01 08:00:00	1.872
2019-01-01 09:00:00	2.012
2019-01-01 10:00:00	2.259
2019-01-01 11:00:00	2.551
2019-01-01 12:00:00	2.828
2019-01-01 13:00:00	3.004
2019-01-01 14:00:00	3.044
2019-01-01 15:00:00	2.953
2019-01-01 16:00:00	2.68
2019-01-01 17:00:00	2.335
2019-01-01 18:00:00	1.972
2019-01-01 19:00:00	1.635
2019-01-01 20:00:00	1.419
2019-01-01 21:00:00	1.355
2019-01-01 22:00:00	1.435
2019-01-01 23:00:00	1.668
2019-01-02	1.945
2019-01-02 01:00:00	2.22
2019-01-02 02:00:00	2.377
2019-01-02 03:00:00	2.427
2019-01-02 04:00:00	2.364
2019-01-02 05:00:00	2.207
2019-01-02 06:00:00	2.034
2019-01-02 07:00:00	1.891
2019-01-02 08:00:00	1.854
2019-01-02 09:00:00	1.932
2019-01-02 10:00:00	2.101
2019-01-02 11:00:00	2.404
2019-01-02 12:00:00	2.687
2019-01-02 13:00:00	2.947
2019-01-02 14:00:00	3.1
2019-01-02 15:00:00	3.069
2019-01-02 16:00:00	2.903
2019-01-02 17:00:00	2.574
2019-01-02 18:00:00	2.173
2019-01-02 19:00:00	1.747
2019-01-02 20:00:00	1.434
2019-01-02 21:00:00	1.239
2019-01-02 22:00:00	1.221
2019-01-02 23:00:00	1.36
2019-01-03	1.635
2019-01-03 01:00:00	1.927
2019-01-03 02:00:00	2.219
2019-01-03 03:00:00	2.405
2019-01-03 04:00:00	2.437
2019-01-03 05:00:00	2.334
2019-01-03 06:00:00	2.178
2019-01-03 07:00:00	2.022
2019-01-03 08:00:00	1.929
2019-01-03 09:00:00	1.911
2019-01-03 10:00:00	2.018
2019-01-03 11:00:00	2.238
2019-01-03 12:00:00	2.52
2019-01-03 13:00:00	2.825
2019-01-03 14:00:00	3.045
2019-01-03 15:00:00	3.177
2019-01-03 16:00:00	3.079
2019-01-03 17:00:00	2.834
2019-01-03 18:00:00	2.453
2019-01-03 19:00:00	2.004
2019-01-03 20:00:00	1.596
2019-01-03 21:00:00	1.293
2019-01-03 22:00:00	1.165
2019-01-03 23:00:00	1.233
2019-01-04	1.449
2019-01-04 01:00:00	1.761
2019-01-04 02:00:00	2.081
2019-01-04 03:00:00	2.331
2019-01-04 04:00:00	2.475
2019-01-04 05:00:00	2.5
2019-01-04 06:00:00	2.375
2019-01-04 07:00:00	2.21
2019-01-04 08:00:00	2.073
2019-01-04 09:00:00	2.003
2019-01-04 10:00:00	2.02
2019-01-04 11:00:00	2.2
2019-01-04 12:00:00	2.458
2019-01-04 13:00:00	2.75
2019-01-04 14:00:00	3.03
2019-01-04 15:00:00	3.201
2019-01-04 16:00:00	3.226
2019-01-04 17:00:00	3.076
2019-01-04 18:00:00	2.751
2019-01-04 19:00:00	2.296
2019-01-04 20:00:00	1.83
2019-01-04 21:00:00	1.446
2019-01-04 22:00:00	1.178
2019-01-04 23:00:00	1.148
2019-01-05	1.29
2019-01-05 01:00:00	1.571
2019-01-05 02:00:00	1.921
2019-01-05 03:00:00	2.24
2019-01-05 04:00:00	2.473
2019-01-05 05:00:00	2.572
2019-01-05 06:00:00	2.509
2019-01-05 07:00:00	2.375
2019-01-05 08:00:00	2.202
2019-01-05 09:00:00	2.09
2019-01-05 10:00:00	2.039
2019-01-05 11:00:00	2.135
2019-01-05 12:00:00	2.328
2019-01-05 13:00:00	2.635
2019-01-05 14:00:00	2.926
2019-01-05 15:00:00	3.164
2019-01-05 16:00:00	3.26
2019-01-05 17:00:00	3.175
2019-01-05 18:00:00	2.942
2019-01-05 19:00:00	2.539
2019-01-05 20:00:00	2.054
2019-01-05 21:00:00	1.625
2019-01-05 22:00:00	1.293
2019-01-05 23:00:00	1.166
2019-01-06	1.199
2019-01-06 01:00:00	1.389
2019-01-06 02:00:00	1.706
2019-01-06 03:00:00	2.069
2019-01-06 04:00:00	2.339
2019-01-06 05:00:00	2.511
2019-01-06 06:00:00	2.539
2019-01-06 07:00:00	2.463
2019-01-06 08:00:00	2.276
2019-01-06 09:00:00	2.13
2019-01-06 10:00:00	2.051
2019-01-06 11:00:00	2.061
2019-01-06 12:00:00	2.193
2019-01-06 13:00:00	2.415
2019-01-06 14:00:00	2.692
2019-01-06 15:00:00	2.977
2019-01-06 16:00:00	3.155
2019-01-06 17:00:00	3.153
2019-01-06 18:00:00	3.03
2019-01-06 19:00:00	2.663
2019-01-06 20:00:00	2.243
2019-01-06 21:00:00	1.76
2019-01-06 22:00:00	1.411
2019-01-06 23:00:00	1.138
2019-01-07	1.11
2019-01-07 01:00:00	1.227
2019-01-07 02:00:00	1.474
2019-01-07 03:00:00	1.798
2019-01-07 04:00:00	2.103
2019-01-07 05:00:00	2.304
2019-01-07 06:00:00	2.445
2019-01-07 07:00:00	2.416
2019-01-07 08:00:00	2.307
2019-01-07 09:00:00	2.156
2019-01-07 10:00:00	2.044
2019-01-07 11:00:00	1.98
2019-01-07 12:00:00	2.058
2019-01-07 13:00:00	2.231
2019-01-07 14:00:00	2.487
2019-01-07 15:00:00	2.76
2019-01-07 16:00:00	2.986
2019-01-07 17:00:00	3.114
2019-01-07 18:00:00	3.045
2019-01-07 19:00:00	2.766
2019-01-07 20:00:00	2.456
2019-01-07 21:00:00	1.998
2019-01-07 22:00:00	1.584
2019-01-07 23:00:00	1.301
2019-01-08	1.157
2019-01-08 01:00:00	1.196
2019-01-08 02:00:00	1.376
2019-01-08 03:00:00	1.656
2019-01-08 04:00:00	1.963
2019-01-08 05:00:00	2.236
2019-01-08 06:00:00	2.415
2019-01-08 07:00:00	2.459
2019-01-08 08:00:00	2.395
2019-01-08 09:00:00	2.284
2019-01-08 10:00:00	2.122
2019-01-08 11:00:00	2.068
2019-01-08 12:00:00	2.108
2019-01-08 13:00:00	2.194
2019-01-08 14:00:00	2.397
2019-01-08 15:00:00	2.634
2019-01-08 16:00:00	2.904
2019-01-08 17:00:00	3.048
2019-01-08 18:00:00	3.063
2019-01-08 19:00:00	2.91
2019-01-08 20:00:00	2.642
2019-01-08 21:00:00	2.232
2019-01-08 22:00:00	1.859
2019-01-08 23:00:00	1.539
2019-01-09	1.341
2019-01-09 01:00:00	1.259
2019-01-09 02:00:00	1.371
2019-01-09 03:00:00	1.568
2019-01-09 04:00:00	1.872
2019-01-09 05:00:00	2.131
2019-01-09 06:00:00	2.372
2019-01-09 07:00:00	2.47
2019-01-09 08:00:00	2.458
2019-01-09 09:00:00	2.363
2019-01-09 10:00:00	2.25
2019-01-09 11:00:00	2.142
2019-01-09 12:00:00	2.089
2019-01-09 13:00:00	2.119
2019-01-09 14:00:00	2.27
2019-01-09 15:00:00	2.465
2019-01-09 16:00:00	2.711
2019-01-09 17:00:00	2.893
2019-01-09 18:00:00	2.966
2019-01-09 19:00:00	2.912
2019-01-09 20:00:00	2.71
2019-01-09 21:00:00	2.425
2019-01-09 22:00:00	2.102
2019-01-09 23:00:00	1.695
2019-01-10	1.491
2019-01-10 01:00:00	1.366
2019-01-10 02:00:00	1.353
2019-01-10 03:00:00	1.516
2019-01-10 04:00:00	1.692
2019-01-10 05:00:00	2.03
2019-01-10 06:00:00	2.255
2019-01-10 07:00:00	2.417
2019-01-10 08:00:00	2.471
2019-01-10 09:00:00	2.375
2019-01-10 10:00:00	2.335
2019-01-10 11:00:00	2.218
2019-01-10 12:00:00	2.132
2019-01-10 13:00:00	2.095
2019-01-10 14:00:00	2.158
2019-01-10 15:00:00	2.224
2019-01-10 16:00:00	2.485
2019-01-10 17:00:00	2.654
2019-01-10 18:00:00	2.749
2019-01-10 19:00:00	2.781
2019-01-10 20:00:00	2.731
2019-01-10 21:00:00	2.513
2019-01-10 22:00:00	2.18
2019-01-10 23:00:00	1.924
2019-01-11	1.649
2019-01-11 01:00:00	1.487
2019-01-11 02:00:00	1.403
2019-01-11 03:00:00	1.503
2019-01-11 04:00:00	1.639
2019-01-11 05:00:00	1.909
2019-01-11 06:00:00	2.129
2019-01-11 07:00:00	2.327
2019-01-11 08:00:00	2.474
2019-01-11 09:00:00	2.467
2019-01-11 10:00:00	2.45
2019-01-11 11:00:00	2.358
2019-01-11 12:00:00	2.242
2019-01-11 13:00:00	2.168
2019-01-11 14:00:00	2.176
2019-01-11 15:00:00	2.219
2019-01-11 16:00:00	2.322
2019-01-11 17:00:00	2.481
2019-01-11 18:00:00	2.608
2019-01-11 19:00:00	2.646
2019-01-11 20:00:00	2.633
2019-01-11 21:00:00	2.533
2019-01-11 22:00:00	2.338
2019-01-11 23:00:00	2.104
2019-01-12	1.891
2019-01-12 01:00:00	1.701
2019-01-12 02:00:00	1.606
2019-01-12 03:00:00	1.587
2019-01-12 04:00:00	1.704
2019-01-12 05:00:00	1.882
2019-01-12 06:00:00	2.09
2019-01-12 07:00:00	2.295
2019-01-12 08:00:00	2.492
2019-01-12 09:00:00	2.56
2019-01-12 10:00:00	2.571
2019-01-12 11:00:00	2.515
2019-01-12 12:00:00	2.39
2019-01-12 13:00:00	2.279
2019-01-12 14:00:00	2.197
2019-01-12 15:00:00	2.178
2019-01-12 16:00:00	2.223
2019-01-12 17:00:00	2.302
2019-01-12 18:00:00	2.397
2019-01-12 19:00:00	2.491
2019-01-12 20:00:00	2.503
2019-01-12 21:00:00	2.504
2019-01-12 22:00:00	2.413
2019-01-12 23:00:00	2.244
2019-01-13	2.049
2019-01-13 01:00:00	1.909
2019-01-13 02:00:00	1.765
2019-01-13 03:00:00	1.687
2019-01-13 04:00:00	1.703
2019-01-13 05:00:00	1.816
2019-01-13 06:00:00	1.945
2019-01-13 07:00:00	2.117
2019-01-13 08:00:00	2.285
2019-01-13 09:00:00	2.488
2019-01-13 10:00:00	2.606
2019-01-13 11:00:00	2.628
2019-01-13 12:00:00	2.533
2019-01-13 13:00:00	2.352
2019-01-13 14:00:00	2.254
2019-01-13 15:00:00	2.142
2019-01-13 16:00:00	2.085
2019-01-13 17:00:00	2.094
2019-01-13 18:00:00	2.165
2019-01-13 19:00:00	2.196
2019-01-13 20:00:00	2.247
2019-01-13 21:00:00	2.339
2019-01-13 22:00:00	2.318
2019-01-13 23:00:00	2.259
2019-01-14	2.176
2019-01-14 01:00:00	2.069
2019-01-14 02:00:00	1.945
2019-01-14 03:00:00	1.815
2019-01-14 04:00:00	1.799
2019-01-14 05:00:00	1.809
2019-01-14 06:00:00	1.933
2019-01-14 07:00:00	2.108
2019-01-14 08:00:00	2.276
2019-01-14 09:00:00	2.493
2019-01-14 10:00:00	2.674
2019-01-14 11:00:00	2.739
2019-01-14 12:00:00	2.724
2019-01-14 13:00:00	2.614
2019-01-14 14:00:00	2.488
2019-01-14 15:00:00	2.332
2019-01-14 16:00:00	2.178
2019-01-14 17:00:00	2.084
2019-01-14 18:00:00	2.048
2019-01-14 19:00:00	2.038
2019-01-14 20:00:00	2.109
2019-01-14 21:00:00	2.197
2019-01-14 22:00:00	2.237
2019-01-14 23:00:00	2.269
2019-01-15	2.292
2019-01-15 01:00:00	2.259
2019-01-15 02:00:00	2.141
2019-01-15 03:00:00	2.065
2019-01-15 04:00:00	1.982
2019-01-15 05:00:00	1.91
2019-01-15 06:00:00	1.941
2019-01-15 07:00:00	2.075
2019-01-15 08:00:00	2.241
2019-01-15 09:00:00	2.489
2019-01-15 10:00:00	2.654
2019-01-15 11:00:00	2.793
2019-01-15 12:00:00	2.835
2019-01-15 13:00:00	2.811
2019-01-15 14:00:00	2.697
2019-01-15 15:00:00	2.497
2019-01-15 16:00:00	2.285
2019-01-15 17:00:00	2.08
2019-01-15 18:00:00	1.911
2019-01-15 19:00:00	1.791
2019-01-15 20:00:00	1.774
2019-01-15 21:00:00	1.893
2019-01-15 22:00:00	1.982
2019-01-15 23:00:00	2.119
2019-01-16	2.231
2019-01-16 01:00:00	2.307
2019-01-16 02:00:00	2.287
2019-01-16 03:00:00	2.205
2019-01-16 04:00:00	2.1
2019-01-16 05:00:00	2
2019-01-16 06:00:00	1.948
2019-01-16 07:00:00	1.986
2019-01-16 08:00:00	2.104
2019-01-16 09:00:00	2.292
2019-01-16 10:00:00	2.532
2019-01-16 11:00:00	2.789
2019-01-16 12:00:00	2.915
2019-01-16 13:00:00	2.947
2019-01-16 14:00:00	2.861
2019-01-16 15:00:00	2.713
2019-01-16 16:00:00	2.4
2019-01-16 17:00:00	2.102
2019-01-16 18:00:00	1.852
2019-01-16 19:00:00	1.612
2019-01-16 20:00:00	1.557
2019-01-16 21:00:00	1.545
2019-01-16 22:00:00	1.691
2019-01-16 23:00:00	1.881
2019-01-17	2.077
2019-01-17 01:00:00	2.248
2019-01-17 02:00:00	2.298
2019-01-17 03:00:00	2.284
2019-01-17 04:00:00	2.225
2019-01-17 05:00:00	2.112
2019-01-17 06:00:00	1.999
2019-01-17 07:00:00	1.957
2019-01-17 08:00:00	1.986
2019-01-17 09:00:00	2.159
2019-01-17 10:00:00	2.377
2019-01-17 11:00:00	2.669
2019-01-17 12:00:00	2.881
2019-01-17 13:00:00	3.032
2019-01-17 14:00:00	3.066
2019-01-17 15:00:00	2.925
2019-01-17 16:00:00	2.651
2019-01-17 17:00:00	2.299
2019-01-17 18:00:00	1.914
2019-01-17 19:00:00	1.602
2019-01-17 20:00:00	1.355
2019-01-17 21:00:00	1.274
2019-01-17 22:00:00	1.345
2019-01-17 23:00:00	1.567
2019-01-18	1.804
2019-01-18 01:00:00	2.084
2019-01-18 02:00:00	2.304
2019-01-18 03:00:00	2.379
2019-01-18 04:00:00	2.314
2019-01-18 05:00:00	2.224
2019-01-18 06:00:00	2.067
2019-01-18 07:00:00	1.975
2019-01-18 08:00:00	1.975
2019-01-18 09:00:00	1.988
2019-01-18 10:00:00	2.252
2019-01-18 11:00:00	2.433
2019-01-18 12:00:00	2.784
2019-01-18 13:00:00	3.03
2019-01-18 14:00:00	3.152
2019-01-18 15:00:00	3.141
2019-01-18 16:00:00	2.93
2019-01-18 17:00:00	2.531
2019-01-18 18:00:00	2.115
2019-01-18 19:00:00	1.667
2019-01-18 20:00:00	1.316
2019-01-18 21:00:00	1.097
2019-01-18 22:00:00	0.998
2019-01-18 23:00:00	1.179
2019-01-19	1.515
2019-01-19 01:00:00	1.851
2019-01-19 02:00:00	2.171
2019-01-19 03:00:00	2.374
2019-01-19 04:00:00	2.427
2019-01-19 05:00:00	2.372
2019-01-19 06:00:00	2.24
2019-01-19 07:00:00	2.008
2019-01-19 08:00:00	1.933
2019-01-19 09:00:00	1.918
2019-01-19 10:00:00	2.022
2019-01-19 11:00:00	2.301
2019-01-19 12:00:00	2.631
2019-01-19 13:00:00	2.96
2019-01-19 14:00:00	3.214
2019-01-19 15:00:00	3.314
2019-01-19 16:00:00	3.251
2019-01-19 17:00:00	2.948
2019-01-19 18:00:00	2.484
2019-01-19 19:00:00	1.9
2019-01-19 20:00:00	1.43
2019-01-19 21:00:00	1.091
2019-01-19 22:00:00	0.905
2019-01-19 23:00:00	0.964
2019-01-20	1.194
2019-01-20 01:00:00	1.576
2019-01-20 02:00:00	1.947
2019-01-20 03:00:00	2.287
2019-01-20 04:00:00	2.474
2019-01-20 05:00:00	2.502
2019-01-20 06:00:00	2.42
2019-01-20 07:00:00	2.243
2019-01-20 08:00:00	2.049
2019-01-20 09:00:00	1.921
2019-01-20 10:00:00	1.949
2019-01-20 11:00:00	2.115
2019-01-20 12:00:00	2.41
2019-01-20 13:00:00	2.768
2019-01-20 14:00:00	3.127
2019-01-20 15:00:00	3.408
2019-01-20 16:00:00	3.449
2019-01-20 17:00:00	3.282
2019-01-20 18:00:00	2.91
2019-01-20 19:00:00	2.365
2019-01-20 20:00:00	1.84
2019-01-20 21:00:00	1.316
2019-01-20 22:00:00	0.988
2019-01-20 23:00:00	0.889
2019-01-21	0.955
2019-01-21 01:00:00	1.274
2019-01-21 02:00:00	1.678
2019-01-21 03:00:00	2.102
2019-01-21 04:00:00	2.438
2019-01-21 05:00:00	2.598
2019-01-21 06:00:00	2.583
2019-01-21 07:00:00	2.41
2019-01-21 08:00:00	2.196
2019-01-21 09:00:00	1.996
2019-01-21 10:00:00	1.852
2019-01-21 11:00:00	1.885
2019-01-21 12:00:00	2.118
2019-01-21 13:00:00	2.45
2019-01-21 14:00:00	2.882
2019-01-21 15:00:00	3.172
2019-01-21 16:00:00	3.488
2019-01-21 17:00:00	3.464
2019-01-21 18:00:00	3.247
2019-01-21 19:00:00	2.782
2019-01-21 20:00:00	2.118
2019-01-21 21:00:00	1.522
2019-01-21 22:00:00	1.148
2019-01-21 23:00:00	0.799
2019-01-22	0.818
2019-01-22 01:00:00	0.998
2019-01-22 02:00:00	1.31
2019-01-22 03:00:00	1.772
2019-01-22 04:00:00	2.106
2019-01-22 05:00:00	2.538
2019-01-22 06:00:00	2.575
2019-01-22 07:00:00	2.496
2019-01-22 08:00:00	2.333
2019-01-22 09:00:00	2.054
2019-01-22 10:00:00	1.869
2019-01-22 11:00:00	1.739
2019-01-22 12:00:00	1.817
2019-01-22 13:00:00	2.043
2019-01-22 14:00:00	2.443
2019-01-22 15:00:00	2.843
2019-01-22 16:00:00	3.184
2019-01-22 17:00:00	3.368
2019-01-22 18:00:00	3.327
2019-01-22 19:00:00	3.011
2019-01-22 20:00:00	2.547
2019-01-22 21:00:00	1.974
2019-01-22 22:00:00	1.408
2019-01-22 23:00:00	1.026
2019-01-23	0.789
2019-01-23 01:00:00	0.831
2019-01-23 02:00:00	1.02
2019-01-23 03:00:00	1.413
2019-01-23 04:00:00	1.88
2019-01-23 05:00:00	2.279
2019-01-23 06:00:00	2.537
2019-01-23 07:00:00	2.595
2019-01-23 08:00:00	2.497
2019-01-23 09:00:00	2.238
2019-01-23 10:00:00	2.006
2019-01-23 11:00:00	1.771
2019-01-23 12:00:00	1.716
2019-01-23 13:00:00	1.762
2019-01-23 14:00:00	2.025
2019-01-23 15:00:00	2.356
2019-01-23 16:00:00	2.775
2019-01-23 17:00:00	3.047
2019-01-23 18:00:00	3.192
2019-01-23 19:00:00	3.11
2019-01-23 20:00:00	2.832
2019-01-23 21:00:00	2.372
2019-01-23 22:00:00	1.852
2019-01-23 23:00:00	1.396
2019-01-24	1.066
2019-01-24 01:00:00	0.93
2019-01-24 02:00:00	1.013
2019-01-24 03:00:00	1.296
2019-01-24 04:00:00	1.679
2019-01-24 05:00:00	2.078
2019-01-24 06:00:00	2.432
2019-01-24 07:00:00	2.652
2019-01-24 08:00:00	2.692
2019-01-24 09:00:00	2.571
2019-01-24 10:00:00	2.346
2019-01-24 11:00:00	2.068
2019-01-24 12:00:00	1.882
2019-01-24 13:00:00	1.816
2019-01-24 14:00:00	1.893
2019-01-24 15:00:00	2.09
2019-01-24 16:00:00	2.407
2019-01-24 17:00:00	2.724
2019-01-24 18:00:00	2.971
2019-01-24 19:00:00	3.063
2019-01-24 20:00:00	2.972
2019-01-24 21:00:00	2.712
2019-01-24 22:00:00	2.289
2019-01-24 23:00:00	1.83
2019-01-25	1.463
2019-01-25 01:00:00	1.223
2019-01-25 02:00:00	1.172
2019-01-25 03:00:00	1.275
2019-01-25 04:00:00	1.547
2019-01-25 05:00:00	1.915
2019-01-25 06:00:00	2.286
2019-01-25 07:00:00	2.582
2019-01-25 08:00:00	2.753
2019-01-25 09:00:00	2.743
2019-01-25 10:00:00	2.603
2019-01-25 11:00:00	2.378
2019-01-25 12:00:00	2.135
2019-01-25 13:00:00	1.939
2019-01-25 14:00:00	1.849
2019-01-25 15:00:00	1.885
2019-01-25 16:00:00	2.043
2019-01-25 17:00:00	2.305
2019-01-25 18:00:00	2.553
2019-01-25 19:00:00	2.745
2019-01-25 20:00:00	2.837
2019-01-25 21:00:00	2.755
2019-01-25 22:00:00	2.523
2019-01-25 23:00:00	2.203
2019-01-26	1.889
2019-01-26 01:00:00	1.625
2019-01-26 02:00:00	1.429
2019-01-26 03:00:00	1.401
2019-01-26 04:00:00	1.523
2019-01-26 05:00:00	1.765
2019-01-26 06:00:00	2.081
2019-01-26 07:00:00	2.408
2019-01-26 08:00:00	2.666
2019-01-26 09:00:00	2.778
2019-01-26 10:00:00	2.742
2019-01-26 11:00:00	2.599
2019-01-26 12:00:00	2.391
2019-01-26 13:00:00	2.172
2019-01-26 14:00:00	1.954
2019-01-26 15:00:00	1.843
2019-01-26 16:00:00	1.854
2019-01-26 17:00:00	1.944
2019-01-26 18:00:00	2.113
2019-01-26 19:00:00	2.313
2019-01-26 20:00:00	2.472
2019-01-26 21:00:00	2.54
2019-01-26 22:00:00	2.487
2019-01-26 23:00:00	2.32
2019-01-27	2.088
2019-01-27 01:00:00	1.879
2019-01-27 02:00:00	1.681
2019-01-27 03:00:00	1.573
2019-01-27 04:00:00	1.564
2019-01-27 05:00:00	1.709
2019-01-27 06:00:00	1.92
2019-01-27 07:00:00	2.215
2019-01-27 08:00:00	2.482
2019-01-27 09:00:00	2.708
2019-01-27 10:00:00	2.816
2019-01-27 11:00:00	2.802
2019-01-27 12:00:00	2.647
2019-01-27 13:00:00	2.457
2019-01-27 14:00:00	2.213
2019-01-27 15:00:00	2
2019-01-27 16:00:00	1.878
2019-01-27 17:00:00	1.822
2019-01-27 18:00:00	1.868
2019-01-27 19:00:00	1.964
2019-01-27 20:00:00	2.136
2019-01-27 21:00:00	2.268
2019-01-27 22:00:00	2.361
2019-01-27 23:00:00	2.368
2019-01-28	2.301
2019-01-28 01:00:00	2.191
2019-01-28 02:00:00	2.058
2019-01-28 03:00:00	1.923
2019-01-28 04:00:00	1.844
2019-01-28 05:00:00	1.848
2019-01-28 06:00:00	1.951
2019-01-28 07:00:00	2.141
2019-01-28 08:00:00	2.394
2019-01-28 09:00:00	2.628
2019-01-28 10:00:00	2.823
2019-01-28 11:00:00	2.931
2019-01-28 12:00:00	2.929
2019-01-28 13:00:00	2.806
2019-01-28 14:00:00	2.599
2019-01-28 15:00:00	2.352
2019-01-28 16:00:00	2.11
2019-01-28 17:00:00	1.875
2019-01-28 18:00:00	1.776
2019-01-28 19:00:00	1.77
2019-01-28 20:00:00	1.854
2019-01-28 21:00:00	1.988
2019-01-28 22:00:00	2.136
2019-01-28 23:00:00	2.265
2019-01-29	2.355
2019-01-29 01:00:00	2.353
2019-01-29 02:00:00	2.3
2019-01-29 03:00:00	2.185
2019-01-29 04:00:00	2.08
2019-01-29 05:00:00	2.013
2019-01-29 06:00:00	2.002
2019-01-29 07:00:00	2.088
2019-01-29 08:00:00	2.27
2019-01-29 09:00:00	2.479
2019-01-29 10:00:00	2.718
2019-01-29 11:00:00	2.881
2019-01-29 12:00:00	2.997
2019-01-29 13:00:00	2.988
2019-01-29 14:00:00	2.831
2019-01-29 15:00:00	2.625
2019-01-29 16:00:00	2.35
2019-01-29 17:00:00	2.053
2019-01-29 18:00:00	1.799
2019-01-29 19:00:00	1.639
2019-01-29 20:00:00	1.625
2019-01-29 21:00:00	1.69
2019-01-29 22:00:00	1.842
2019-01-29 23:00:00	2.058
2019-01-30	2.231
2019-01-30 01:00:00	2.391
2019-01-30 02:00:00	2.439
2019-01-30 03:00:00	2.393
2019-01-30 04:00:00	2.32
2019-01-30 05:00:00	2.207
2019-01-30 06:00:00	2.124
2019-01-30 07:00:00	2.095
2019-01-30 08:00:00	2.163
2019-01-30 09:00:00	2.302
2019-01-30 10:00:00	2.53
2019-01-30 11:00:00	2.758
2019-01-30 12:00:00	2.949
2019-01-30 13:00:00	3.046
2019-01-30 14:00:00	3.052
2019-01-30 15:00:00	2.887
2019-01-30 16:00:00	2.627
2019-01-30 17:00:00	2.289
2019-01-30 18:00:00	1.956
2019-01-30 19:00:00	1.663
2019-01-30 20:00:00	1.478
2019-01-30 21:00:00	1.462
2019-01-30 22:00:00	1.555
2019-01-30 23:00:00	1.748
2019-01-31	2.028
2019-01-31 01:00:00	2.275
2019-01-31 02:00:00	2.444
2019-01-31 03:00:00	2.503
2019-01-31 04:00:00	2.446
2019-01-31 05:00:00	2.36
2019-01-31 06:00:00	2.231
2019-01-31 07:00:00	2.136
2019-01-31 08:00:00	2.117
2019-01-31 09:00:00	2.183
2019-01-31 10:00:00	2.355
2019-01-31 11:00:00	2.568
2019-01-31 12:00:00	2.814
2019-01-31 13:00:00	3.008
2019-01-31 14:00:00	3.088
2019-01-31 15:00:00	3.042
2019-01-31 16:00:00	2.843
2019-01-31 17:00:00	2.538
2019-01-31 18:00:00	2.138
2019-01-31 19:00:00	1.784
2019-01-31 20:00:00	1.482
2019-01-31 21:00:00	1.352
2019-01-31 22:00:00	1.355
2019-01-31 23:00:00	1.523
2019-02-01	1.794
2019-02-01 01:00:00	2.084
2019-02-01 02:00:00	2.349
2019-02-01 03:00:00	2.483
2019-02-01 04:00:00	2.511
2019-02-01 05:00:00	2.47
2019-02-01 06:00:00	2.324
2019-02-01 07:00:00	2.184
2019-02-01 08:00:00	2.096
2019-02-01 09:00:00	2.087
2019-02-01 10:00:00	2.191
2019-02-01 11:00:00	2.39
2019-02-01 12:00:00	2.66
2019-02-01 13:00:00	2.906
2019-02-01 14:00:00	3.053
2019-02-01 15:00:00	3.139
2019-02-01 16:00:00	3.013
2019-02-01 17:00:00	2.737
2019-02-01 18:00:00	2.362
2019-02-01 19:00:00	1.913
2019-02-01 20:00:00	1.546
2019-02-01 21:00:00	1.302
2019-02-01 22:00:00	1.198
2019-02-01 23:00:00	1.29
2019-02-02	1.546
2019-02-02 01:00:00	1.878
2019-02-02 02:00:00	2.171
2019-02-02 03:00:00	2.402
2019-02-02 04:00:00	2.554
2019-02-02 05:00:00	2.54
2019-02-02 06:00:00	2.422
2019-02-02 07:00:00	2.245
2019-02-02 08:00:00	2.12
2019-02-02 09:00:00	2.05
2019-02-02 10:00:00	2.098
2019-02-02 11:00:00	2.282
2019-02-02 12:00:00	2.543
2019-02-02 13:00:00	2.815
2019-02-02 14:00:00	3.078
2019-02-02 15:00:00	3.209
2019-02-02 16:00:00	3.188
2019-02-02 17:00:00	2.985
2019-02-02 18:00:00	2.639
2019-02-02 19:00:00	2.209
2019-02-02 20:00:00	1.802
2019-02-02 21:00:00	1.457
2019-02-02 22:00:00	1.263
2019-02-02 23:00:00	1.285
2019-02-03	1.451
2019-02-03 01:00:00	1.781
2019-02-03 02:00:00	2.091
2019-02-03 03:00:00	2.403
2019-02-03 04:00:00	2.601
2019-02-03 05:00:00	2.664
2019-02-03 06:00:00	2.545
2019-02-03 07:00:00	2.385
2019-02-03 08:00:00	2.199
2019-02-03 09:00:00	2.063
2019-02-03 10:00:00	2.009
2019-02-03 11:00:00	2.133
2019-02-03 12:00:00	2.369
2019-02-03 13:00:00	2.65
2019-02-03 14:00:00	2.966
2019-02-03 15:00:00	3.167
2019-02-03 16:00:00	3.22
2019-02-03 17:00:00	3.09
2019-02-03 18:00:00	2.801
2019-02-03 19:00:00	2.407
2019-02-03 20:00:00	1.943
2019-02-03 21:00:00	1.512
2019-02-03 22:00:00	1.32
2019-02-03 23:00:00	1.147
2019-02-04	1.296
2019-02-04 01:00:00	1.536
2019-02-04 02:00:00	1.954
2019-02-04 03:00:00	2.221
2019-02-04 04:00:00	2.537
2019-02-04 05:00:00	2.651
2019-02-04 06:00:00	2.607
2019-02-04 07:00:00	2.437
2019-02-04 08:00:00	2.274
2019-02-04 09:00:00	2.097
2019-02-04 10:00:00	2.017
2019-02-04 11:00:00	2.026
2019-02-04 12:00:00	2.191
2019-02-04 13:00:00	2.468
2019-02-04 14:00:00	2.778
2019-02-04 15:00:00	3.06
2019-02-04 16:00:00	3.178
2019-02-04 17:00:00	3.174
2019-02-04 18:00:00	2.993
2019-02-04 19:00:00	2.621
2019-02-04 20:00:00	2.169
2019-02-04 21:00:00	1.785
2019-02-04 22:00:00	1.444
2019-02-04 23:00:00	1.256
2019-02-05	1.287
2019-02-05 01:00:00	1.459
2019-02-05 02:00:00	1.762
2019-02-05 03:00:00	2.108
2019-02-05 04:00:00	2.424
2019-02-05 05:00:00	2.601
2019-02-05 06:00:00	2.624
2019-02-05 07:00:00	2.547
2019-02-05 08:00:00	2.352
2019-02-05 09:00:00	2.153
2019-02-05 10:00:00	2.03
2019-02-05 11:00:00	1.971
2019-02-05 12:00:00	2.083
2019-02-05 13:00:00	2.283
2019-02-05 14:00:00	2.572
2019-02-05 15:00:00	2.874
2019-02-05 16:00:00	3.078
2019-02-05 17:00:00	3.179
2019-02-05 18:00:00	3.078
2019-02-05 19:00:00	2.754
2019-02-05 20:00:00	2.387
2019-02-05 21:00:00	1.96
2019-02-05 22:00:00	1.561
2019-02-05 23:00:00	1.344
2019-02-06	1.275
2019-02-06 01:00:00	1.411
2019-02-06 02:00:00	1.608
2019-02-06 03:00:00	1.953
2019-02-06 04:00:00	2.291
2019-02-06 05:00:00	2.541
2019-02-06 06:00:00	2.645
2019-02-06 07:00:00	2.589
2019-02-06 08:00:00	2.415
2019-02-06 09:00:00	2.212
2019-02-06 10:00:00	2.055
2019-02-06 11:00:00	1.908
2019-02-06 12:00:00	1.925
2019-02-06 13:00:00	2.103
2019-02-06 14:00:00	2.358
2019-02-06 15:00:00	2.636
2019-02-06 16:00:00	2.856
2019-02-06 17:00:00	3.033
2019-02-06 18:00:00	2.979
2019-02-06 19:00:00	2.812
2019-02-06 20:00:00	2.448
2019-02-06 21:00:00	2.058
2019-02-06 22:00:00	1.68
2019-02-06 23:00:00	1.403
2019-02-07	1.282
2019-02-07 01:00:00	1.29
2019-02-07 02:00:00	1.483
2019-02-07 03:00:00	1.757
2019-02-07 04:00:00	2.075
2019-02-07 05:00:00	2.359
2019-02-07 06:00:00	2.484
2019-02-07 07:00:00	2.517
2019-02-07 08:00:00	2.409
2019-02-07 09:00:00	2.224
2019-02-07 10:00:00	2.001
2019-02-07 11:00:00	1.855
2019-02-07 12:00:00	1.817
2019-02-07 13:00:00	1.906
2019-02-07 14:00:00	2.084
2019-02-07 15:00:00	2.322
2019-02-07 16:00:00	2.605
2019-02-07 17:00:00	2.79
2019-02-07 18:00:00	2.865
2019-02-07 19:00:00	2.764
2019-02-07 20:00:00	2.52
2019-02-07 21:00:00	2.207
2019-02-07 22:00:00	1.834
2019-02-07 23:00:00	1.537
2019-02-08	1.347
2019-02-08 01:00:00	1.313
2019-02-08 02:00:00	1.428
2019-02-08 03:00:00	1.659
2019-02-08 04:00:00	1.949
2019-02-08 05:00:00	2.233
2019-02-08 06:00:00	2.43
2019-02-08 07:00:00	2.546
2019-02-08 08:00:00	2.525
2019-02-08 09:00:00	2.363
2019-02-08 10:00:00	2.169
2019-02-08 11:00:00	1.991
2019-02-08 12:00:00	1.868
2019-02-08 13:00:00	1.876
2019-02-08 14:00:00	1.981
2019-02-08 15:00:00	2.18
2019-02-08 16:00:00	2.435
2019-02-08 17:00:00	2.654
2019-02-08 18:00:00	2.771
2019-02-08 19:00:00	2.765
2019-02-08 20:00:00	2.628
2019-02-08 21:00:00	2.375
2019-02-08 22:00:00	2.031
2019-02-08 23:00:00	1.76
2019-02-09	1.559
2019-02-09 01:00:00	1.456
2019-02-09 02:00:00	1.522
2019-02-09 03:00:00	1.695
2019-02-09 04:00:00	1.917
2019-02-09 05:00:00	2.2
2019-02-09 06:00:00	2.428
2019-02-09 07:00:00	2.569
2019-02-09 08:00:00	2.612
2019-02-09 09:00:00	2.516
2019-02-09 10:00:00	2.357
2019-02-09 11:00:00	2.158
2019-02-09 12:00:00	1.997
2019-02-09 13:00:00	1.924
2019-02-09 14:00:00	1.932
2019-02-09 15:00:00	2.076
2019-02-09 16:00:00	2.244
2019-02-09 17:00:00	2.441
2019-02-09 18:00:00	2.594
2019-02-09 19:00:00	2.645
2019-02-09 20:00:00	2.597
2019-02-09 21:00:00	2.445
2019-02-09 22:00:00	2.203
2019-02-09 23:00:00	1.948
2019-02-10	1.754
2019-02-10 01:00:00	1.624
2019-02-10 02:00:00	1.603
2019-02-10 03:00:00	1.713
2019-02-10 04:00:00	1.887
2019-02-10 05:00:00	2.123
2019-02-10 06:00:00	2.344
2019-02-10 07:00:00	2.51
2019-02-10 08:00:00	2.599
2019-02-10 09:00:00	2.572
2019-02-10 10:00:00	2.459
2019-02-10 11:00:00	2.282
2019-02-10 12:00:00	2.109
2019-02-10 13:00:00	1.955
2019-02-10 14:00:00	1.904
2019-02-10 15:00:00	1.949
2019-02-10 16:00:00	2.049
2019-02-10 17:00:00	2.218
2019-02-10 18:00:00	2.333
2019-02-10 19:00:00	2.446
2019-02-10 20:00:00	2.457
2019-02-10 21:00:00	2.413
2019-02-10 22:00:00	2.271
2019-02-10 23:00:00	2.091
2019-02-11	1.9
2019-02-11 01:00:00	1.762
2019-02-11 02:00:00	1.706
2019-02-11 03:00:00	1.727
2019-02-11 04:00:00	1.835
2019-02-11 05:00:00	2.004
2019-02-11 06:00:00	2.235
2019-02-11 07:00:00	2.43
2019-02-11 08:00:00	2.595
2019-02-11 09:00:00	2.604
2019-02-11 10:00:00	2.566
2019-02-11 11:00:00	2.446
2019-02-11 12:00:00	2.263
2019-02-11 13:00:00	2.079
2019-02-11 14:00:00	1.928
2019-02-11 15:00:00	1.864
2019-02-11 16:00:00	1.867
2019-02-11 17:00:00	1.891
2019-02-11 18:00:00	2.01
2019-02-11 19:00:00	2.103
2019-02-11 20:00:00	2.174
2019-02-11 21:00:00	2.202
2019-02-11 22:00:00	2.145
2019-02-11 23:00:00	2.086
2019-02-12	1.971
2019-02-12 01:00:00	1.864
2019-02-12 02:00:00	1.812
2019-02-12 03:00:00	1.784
2019-02-12 04:00:00	1.831
2019-02-12 05:00:00	1.958
2019-02-12 06:00:00	2.121
2019-02-12 07:00:00	2.303
2019-02-12 08:00:00	2.473
2019-02-12 09:00:00	2.585
2019-02-12 10:00:00	2.638
2019-02-12 11:00:00	2.573
2019-02-12 12:00:00	2.45
2019-02-12 13:00:00	2.301
2019-02-12 14:00:00	2.126
2019-02-12 15:00:00	1.993
2019-02-12 16:00:00	1.877
2019-02-12 17:00:00	1.832
2019-02-12 18:00:00	1.835
2019-02-12 19:00:00	1.9
2019-02-12 20:00:00	1.995
2019-02-12 21:00:00	2.098
2019-02-12 22:00:00	2.116
2019-02-12 23:00:00	2.158
2019-02-13	2.179
2019-02-13 01:00:00	2.123
2019-02-13 02:00:00	2.067
2019-02-13 03:00:00	1.993
2019-02-13 04:00:00	1.995
2019-02-13 05:00:00	2.039
2019-02-13 06:00:00	2.153
2019-02-13 07:00:00	2.269
2019-02-13 08:00:00	2.454
2019-02-13 09:00:00	2.626
2019-02-13 10:00:00	2.737
2019-02-13 11:00:00	2.771
2019-02-13 12:00:00	2.72
2019-02-13 13:00:00	2.611
2019-02-13 14:00:00	2.422
2019-02-13 15:00:00	2.202
2019-02-13 16:00:00	2.003
2019-02-13 17:00:00	1.836
2019-02-13 18:00:00	1.751
2019-02-13 19:00:00	1.723
2019-02-13 20:00:00	1.73
2019-02-13 21:00:00	1.828
2019-02-13 22:00:00	1.965
2019-02-13 23:00:00	2.07
2019-02-14	2.191
2019-02-14 01:00:00	2.24
2019-02-14 02:00:00	2.26
2019-02-14 03:00:00	2.173
2019-02-14 04:00:00	2.143
2019-02-14 05:00:00	2.1
2019-02-14 06:00:00	2.102
2019-02-14 07:00:00	2.192
2019-02-14 08:00:00	2.305
2019-02-14 09:00:00	2.525
2019-02-14 10:00:00	2.685
2019-02-14 11:00:00	2.855
2019-02-14 12:00:00	2.897
2019-02-14 13:00:00	2.883
2019-02-14 14:00:00	2.722
2019-02-14 15:00:00	2.519
2019-02-14 16:00:00	2.243
2019-02-14 17:00:00	1.961
2019-02-14 18:00:00	1.708
2019-02-14 19:00:00	1.59
2019-02-14 20:00:00	1.52
2019-02-14 21:00:00	1.63
2019-02-14 22:00:00	1.791
2019-02-14 23:00:00	1.965
2019-02-15	2.17
2019-02-15 01:00:00	2.243
2019-02-15 02:00:00	2.39
2019-02-15 03:00:00	2.324
2019-02-15 04:00:00	2.261
2019-02-15 05:00:00	2.166
2019-02-15 06:00:00	2.099
2019-02-15 07:00:00	2.09
2019-02-15 08:00:00	2.165
2019-02-15 09:00:00	2.332
2019-02-15 10:00:00	2.557
2019-02-15 11:00:00	2.773
2019-02-15 12:00:00	2.924
2019-02-15 13:00:00	3.027
2019-02-15 14:00:00	2.93
2019-02-15 15:00:00	2.685
2019-02-15 16:00:00	2.422
2019-02-15 17:00:00	2.074
2019-02-15 18:00:00	1.705
2019-02-15 19:00:00	1.441
2019-02-15 20:00:00	1.194
2019-02-15 21:00:00	1.217
2019-02-15 22:00:00	1.309
2019-02-15 23:00:00	1.57
2019-02-16	1.829
2019-02-16 01:00:00	2.122
2019-02-16 02:00:00	2.275
2019-02-16 03:00:00	2.342
2019-02-16 04:00:00	2.321
2019-02-16 05:00:00	2.228
2019-02-16 06:00:00	2.073
2019-02-16 07:00:00	1.972
2019-02-16 08:00:00	2.011
2019-02-16 09:00:00	2.101
2019-02-16 10:00:00	2.234
2019-02-16 11:00:00	2.534
2019-02-16 12:00:00	2.845
2019-02-16 13:00:00	3.051
2019-02-16 14:00:00	3.096
2019-02-16 15:00:00	3.039
2019-02-16 16:00:00	2.75
2019-02-16 17:00:00	2.32
2019-02-16 18:00:00	1.867
2019-02-16 19:00:00	1.45
2019-02-16 20:00:00	1.059
2019-02-16 21:00:00	0.985
2019-02-16 22:00:00	1.002
2019-02-16 23:00:00	1.187
2019-02-17	1.545
2019-02-17 01:00:00	1.869
2019-02-17 02:00:00	2.206
2019-02-17 03:00:00	2.382
2019-02-17 04:00:00	2.432
2019-02-17 05:00:00	2.327
2019-02-17 06:00:00	2.163
2019-02-17 07:00:00	1.928
2019-02-17 08:00:00	1.846
2019-02-17 09:00:00	1.853
2019-02-17 10:00:00	1.961
2019-02-17 11:00:00	2.106
2019-02-17 12:00:00	2.476
2019-02-17 13:00:00	2.876
2019-02-17 14:00:00	3.117
2019-02-17 15:00:00	3.145
2019-02-17 16:00:00	3.069
2019-02-17 17:00:00	2.731
2019-02-17 18:00:00	2.239
2019-02-17 19:00:00	1.758
2019-02-17 20:00:00	1.297
2019-02-17 21:00:00	0.985
2019-02-17 22:00:00	0.873
2019-02-17 23:00:00	0.986
2019-02-18	1.258
2019-02-18 01:00:00	1.71
2019-02-18 02:00:00	2.094
2019-02-18 03:00:00	2.398
2019-02-18 04:00:00	2.539
2019-02-18 05:00:00	2.486
2019-02-18 06:00:00	2.338
2019-02-18 07:00:00	2.11
2019-02-18 08:00:00	1.828
2019-02-18 09:00:00	1.73
2019-02-18 10:00:00	1.799
2019-02-18 11:00:00	1.996
2019-02-18 12:00:00	2.319
2019-02-18 13:00:00	2.705
2019-02-18 14:00:00	3.033
2019-02-18 15:00:00	3.289
2019-02-18 16:00:00	3.294
2019-02-18 17:00:00	3.11
2019-02-18 18:00:00	2.683
2019-02-18 19:00:00	2.175
2019-02-18 20:00:00	1.581
2019-02-18 21:00:00	1.141
2019-02-18 22:00:00	0.841
2019-02-18 23:00:00	0.815
2019-02-19	0.994
2019-02-19 01:00:00	1.386
2019-02-19 02:00:00	1.787
2019-02-19 03:00:00	2.234
2019-02-19 04:00:00	2.514
2019-02-19 05:00:00	2.64
2019-02-19 06:00:00	2.514
2019-02-19 07:00:00	2.275
2019-02-19 08:00:00	1.991
2019-02-19 09:00:00	1.734
2019-02-19 10:00:00	1.584
2019-02-19 11:00:00	1.642
2019-02-19 12:00:00	1.861
2019-02-19 13:00:00	2.268
2019-02-19 14:00:00	2.683
2019-02-19 15:00:00	3.047
2019-02-19 16:00:00	3.263
2019-02-19 17:00:00	3.239
2019-02-19 18:00:00	2.983
2019-02-19 19:00:00	2.481
2019-02-19 20:00:00	1.935
2019-02-19 21:00:00	1.406
2019-02-19 22:00:00	0.97
2019-02-19 23:00:00	0.768
2019-02-20	0.839
2019-02-20 01:00:00	1.111
2019-02-20 02:00:00	1.523
2019-02-20 03:00:00	2.002
2019-02-20 04:00:00	2.413
2019-02-20 05:00:00	2.662
2019-02-20 06:00:00	2.655
2019-02-20 07:00:00	2.481
2019-02-20 08:00:00	2.184
2019-02-20 09:00:00	1.867
2019-02-20 10:00:00	1.588
2019-02-20 11:00:00	1.481
2019-02-20 12:00:00	1.565
2019-02-20 13:00:00	1.857
2019-02-20 14:00:00	2.253
2019-02-20 15:00:00	2.709
2019-02-20 16:00:00	3.071
2019-02-20 17:00:00	3.242
2019-02-20 18:00:00	3.162
2019-02-20 19:00:00	2.864
2019-02-20 20:00:00	2.369
2019-02-20 21:00:00	1.806
2019-02-20 22:00:00	1.327
2019-02-20 23:00:00	1.019
2019-02-21	0.928
2019-02-21 01:00:00	1.088
2019-02-21 02:00:00	1.436
2019-02-21 03:00:00	1.904
2019-02-21 04:00:00	2.318
2019-02-21 05:00:00	2.703
2019-02-21 06:00:00	2.871
2019-02-21 07:00:00	2.823
2019-02-21 08:00:00	2.624
2019-02-21 09:00:00	2.272
2019-02-21 10:00:00	1.91
2019-02-21 11:00:00	1.62
2019-02-21 12:00:00	1.575
2019-02-21 13:00:00	1.697
2019-02-21 14:00:00	1.982
2019-02-21 15:00:00	2.383
2019-02-21 16:00:00	2.847
2019-02-21 17:00:00	3.104
2019-02-21 18:00:00	3.193
2019-02-21 19:00:00	3.094
2019-02-21 20:00:00	2.785
2019-02-21 21:00:00	2.319
2019-02-21 22:00:00	1.841
2019-02-21 23:00:00	1.423
2019-02-22	1.18
2019-02-22 01:00:00	1.196
2019-02-22 02:00:00	1.392
2019-02-22 03:00:00	1.743
2019-02-22 04:00:00	2.205
2019-02-22 05:00:00	2.577
2019-02-22 06:00:00	2.805
2019-02-22 07:00:00	2.908
2019-02-22 08:00:00	2.764
2019-02-22 09:00:00	2.504
2019-02-22 10:00:00	2.138
2019-02-22 11:00:00	1.817
2019-02-22 12:00:00	1.57
2019-02-22 13:00:00	1.463
2019-02-22 14:00:00	1.629
2019-02-22 15:00:00	1.902
2019-02-22 16:00:00	2.257
2019-02-22 17:00:00	2.596
2019-02-22 18:00:00	2.816
2019-02-22 19:00:00	2.852
2019-02-22 20:00:00	2.725
2019-02-22 21:00:00	2.427
2019-02-22 22:00:00	2.021
2019-02-22 23:00:00	1.64
2019-02-23	1.317
2019-02-23 01:00:00	1.185
2019-02-23 02:00:00	1.235
2019-02-23 03:00:00	1.471
2019-02-23 04:00:00	1.811
2019-02-23 05:00:00	2.214
2019-02-23 06:00:00	2.524
2019-02-23 07:00:00	2.712
2019-02-23 08:00:00	2.741
2019-02-23 09:00:00	2.59
2019-02-23 10:00:00	2.299
2019-02-23 11:00:00	1.964
2019-02-23 12:00:00	1.652
2019-02-23 13:00:00	1.442
2019-02-23 14:00:00	1.407
2019-02-23 15:00:00	1.522
2019-02-23 16:00:00	1.754
2019-02-23 17:00:00	2.043
2019-02-23 18:00:00	2.31
2019-02-23 19:00:00	2.462
2019-02-23 20:00:00	2.487
2019-02-23 21:00:00	2.383
2019-02-23 22:00:00	2.14
2019-02-23 23:00:00	1.841
2019-02-24	1.563
2019-02-24 01:00:00	1.396
2019-02-24 02:00:00	1.365
2019-02-24 03:00:00	1.469
2019-02-24 04:00:00	1.699
2019-02-24 05:00:00	2.008
2019-02-24 06:00:00	2.315
2019-02-24 07:00:00	2.559
2019-02-24 08:00:00	2.704
2019-02-24 09:00:00	2.704
2019-02-24 10:00:00	2.547
2019-02-24 11:00:00	2.305
2019-02-24 12:00:00	2.002
2019-02-24 13:00:00	1.752
2019-02-24 14:00:00	1.547
2019-02-24 15:00:00	1.51
2019-02-24 16:00:00	1.578
2019-02-24 17:00:00	1.748
2019-02-24 18:00:00	1.95
2019-02-24 19:00:00	2.145
2019-02-24 20:00:00	2.284
2019-02-24 21:00:00	2.318
2019-02-24 22:00:00	2.241
2019-02-24 23:00:00	2.108
2019-02-25	1.902
2019-02-25 01:00:00	1.756
2019-02-25 02:00:00	1.672
2019-02-25 03:00:00	1.689
2019-02-25 04:00:00	1.796
2019-02-25 05:00:00	1.986
2019-02-25 06:00:00	2.205
2019-02-25 07:00:00	2.439
2019-02-25 08:00:00	2.63
2019-02-25 09:00:00	2.725
2019-02-25 10:00:00	2.705
2019-02-25 11:00:00	2.568
2019-02-25 12:00:00	2.359
2019-02-25 13:00:00	2.108
2019-02-25 14:00:00	1.859
2019-02-25 15:00:00	1.694
2019-02-25 16:00:00	1.602
2019-02-25 17:00:00	1.614
2019-02-25 18:00:00	1.695
2019-02-25 19:00:00	1.823
2019-02-25 20:00:00	1.982
2019-02-25 21:00:00	2.116
2019-02-25 22:00:00	2.183
2019-02-25 23:00:00	2.187
2019-02-26	2.108
2019-02-26 01:00:00	2.015
2019-02-26 02:00:00	1.943
2019-02-26 03:00:00	1.918
2019-02-26 04:00:00	1.921
2019-02-26 05:00:00	1.987
2019-02-26 06:00:00	2.114
2019-02-26 07:00:00	2.261
2019-02-26 08:00:00	2.449
2019-02-26 09:00:00	2.605
2019-02-26 10:00:00	2.688
2019-02-26 11:00:00	2.687
2019-02-26 12:00:00	2.592
2019-02-26 13:00:00	2.401
2019-02-26 14:00:00	2.195
2019-02-26 15:00:00	1.972
2019-02-26 16:00:00	1.773
2019-02-26 17:00:00	1.612
2019-02-26 18:00:00	1.571
2019-02-26 19:00:00	1.568
2019-02-26 20:00:00	1.688
2019-02-26 21:00:00	1.831
2019-02-26 22:00:00	1.968
2019-02-26 23:00:00	2.104
2019-02-27	2.181
2019-02-27 01:00:00	2.215
2019-02-27 02:00:00	2.17
2019-02-27 03:00:00	2.121
2019-02-27 04:00:00	2.055
2019-02-27 05:00:00	2.036
2019-02-27 06:00:00	2.057
2019-02-27 07:00:00	2.145
2019-02-27 08:00:00	2.288
2019-02-27 09:00:00	2.413
2019-02-27 10:00:00	2.559
2019-02-27 11:00:00	2.654
2019-02-27 12:00:00	2.687
2019-02-27 13:00:00	2.619
2019-02-27 14:00:00	2.446
2019-02-27 15:00:00	2.216
2019-02-27 16:00:00	1.952
2019-02-27 17:00:00	1.726
2019-02-27 18:00:00	1.539
2019-02-27 19:00:00	1.461
2019-02-27 20:00:00	1.437
2019-02-27 21:00:00	1.538
2019-02-27 22:00:00	1.688
2019-02-27 23:00:00	1.878
2019-02-28	2.048
2019-02-28 01:00:00	2.196
2019-02-28 02:00:00	2.257
2019-02-28 03:00:00	2.247
2019-02-28 04:00:00	2.204
2019-02-28 05:00:00	2.122
2019-02-28 06:00:00	2.06
2019-02-28 07:00:00	2.053
2019-02-28 08:00:00	2.123
2019-02-28 09:00:00	2.241
2019-02-28 10:00:00	2.404
2019-02-28 11:00:00	2.535
2019-02-28 12:00:00	2.687
2019-02-28 13:00:00	2.701
2019-02-28 14:00:00	2.642
2019-02-28 15:00:00	2.483
2019-02-28 16:00:00	2.226
2019-02-28 17:00:00	1.916
2019-02-28 18:00:00	1.64
2019-02-28 19:00:00	1.438
2019-02-28 20:00:00	1.334
2019-02-28 21:00:00	1.332
2019-02-28 22:00:00	1.461
2019-02-28 23:00:00	1.689
2019-03-01	1.916
2019-03-01 01:00:00	2.141
2019-03-01 02:00:00	2.289
2019-03-01 03:00:00	2.337
2019-03-01 04:00:00	2.303
2019-03-01 05:00:00	2.213
2019-03-01 06:00:00	2.106
2019-03-01 07:00:00	2.011
2019-03-01 08:00:00	1.995
2019-03-01 09:00:00	2.041
2019-03-01 10:00:00	2.179
2019-03-01 11:00:00	2.384
2019-03-01 12:00:00	2.591
2019-03-01 13:00:00	2.743
2019-03-01 14:00:00	2.79
2019-03-01 15:00:00	2.697
2019-03-01 16:00:00	2.464
2019-03-01 17:00:00	2.168
2019-03-01 18:00:00	1.836
2019-03-01 19:00:00	1.506
2019-03-01 20:00:00	1.292
2019-03-01 21:00:00	1.214
2019-03-01 22:00:00	1.29
2019-03-01 23:00:00	1.471
2019-03-02	1.742
2019-03-02 01:00:00	2.046
2019-03-02 02:00:00	2.271
2019-03-02 03:00:00	2.416
2019-03-02 04:00:00	2.431
2019-03-02 05:00:00	2.345
2019-03-02 06:00:00	2.18
2019-03-02 07:00:00	2.047
2019-03-02 08:00:00	1.968
2019-03-02 09:00:00	1.966
2019-03-02 10:00:00	2.077
2019-03-02 11:00:00	2.26
2019-03-02 12:00:00	2.496
2019-03-02 13:00:00	2.727
2019-03-02 14:00:00	2.841
2019-03-02 15:00:00	2.873
2019-03-02 16:00:00	2.715
2019-03-02 17:00:00	2.429
2019-03-02 18:00:00	2.064
2019-03-02 19:00:00	1.706
2019-03-02 20:00:00	1.38
2019-03-02 21:00:00	1.234
2019-03-02 22:00:00	1.218
2019-03-02 23:00:00	1.328
2019-03-03	1.584
2019-03-03 01:00:00	1.901
2019-03-03 02:00:00	2.22
2019-03-03 03:00:00	2.406
2019-03-03 04:00:00	2.473
2019-03-03 05:00:00	2.417
2019-03-03 06:00:00	2.26
2019-03-03 07:00:00	2.095
2019-03-03 08:00:00	1.939
2019-03-03 09:00:00	1.885
2019-03-03 10:00:00	1.932
2019-03-03 11:00:00	2.077
2019-03-03 12:00:00	2.326
2019-03-03 13:00:00	2.592
2019-03-03 14:00:00	2.799
2019-03-03 15:00:00	2.876
2019-03-03 16:00:00	2.834
2019-03-03 17:00:00	2.603
2019-03-03 18:00:00	2.246
2019-03-03 19:00:00	1.844
2019-03-03 20:00:00	1.482
2019-03-03 21:00:00	1.238
2019-03-03 22:00:00	1.133
2019-03-03 23:00:00	1.199
2019-03-04	1.436
2019-03-04 01:00:00	1.738
2019-03-04 02:00:00	2.083
2019-03-04 03:00:00	2.354
2019-03-04 04:00:00	2.474
2019-03-04 05:00:00	2.466
2019-03-04 06:00:00	2.316
2019-03-04 07:00:00	2.127
2019-03-04 08:00:00	1.939
2019-03-04 09:00:00	1.81
2019-03-04 10:00:00	1.801
2019-03-04 11:00:00	1.903
2019-03-04 12:00:00	2.115
2019-03-04 13:00:00	2.408
2019-03-04 14:00:00	2.693
2019-03-04 15:00:00	2.87
2019-03-04 16:00:00	2.893
2019-03-04 17:00:00	2.735
2019-03-04 18:00:00	2.451
2019-03-04 19:00:00	2.061
2019-03-04 20:00:00	1.662
2019-03-04 21:00:00	1.35
2019-03-04 22:00:00	1.164
2019-03-04 23:00:00	1.163
2019-03-05	1.322
2019-03-05 01:00:00	1.642
2019-03-05 02:00:00	1.985
2019-03-05 03:00:00	2.28
2019-03-05 04:00:00	2.492
2019-03-05 05:00:00	2.544
2019-03-05 06:00:00	2.41
2019-03-05 07:00:00	2.211
2019-03-05 08:00:00	1.987
2019-03-05 09:00:00	1.805
2019-03-05 10:00:00	1.724
2019-03-05 11:00:00	1.782
2019-03-05 12:00:00	1.975
2019-03-05 13:00:00	2.27
2019-03-05 14:00:00	2.559
2019-03-05 15:00:00	2.794
2019-03-05 16:00:00	2.92
2019-03-05 17:00:00	2.886
2019-03-05 18:00:00	2.625
2019-03-05 19:00:00	2.26
2019-03-05 20:00:00	1.844
2019-03-05 21:00:00	1.478
2019-03-05 22:00:00	1.233
2019-03-05 23:00:00	1.163
2019-03-06	1.295
2019-03-06 01:00:00	1.524
2019-03-06 02:00:00	1.867
2019-03-06 03:00:00	2.205
2019-03-06 04:00:00	2.477
2019-03-06 05:00:00	2.584
2019-03-06 06:00:00	2.526
2019-03-06 07:00:00	2.34
2019-03-06 08:00:00	2.151
2019-03-06 09:00:00	1.864
2019-03-06 10:00:00	1.736
2019-03-06 11:00:00	1.708
2019-03-06 12:00:00	1.8
2019-03-06 13:00:00	2.116
2019-03-06 14:00:00	2.422
2019-03-06 15:00:00	2.698
2019-03-06 16:00:00	2.889
2019-03-06 17:00:00	2.896
2019-03-06 18:00:00	2.731
2019-03-06 19:00:00	2.433
2019-03-06 20:00:00	2.06
2019-03-06 21:00:00	1.675
2019-03-06 22:00:00	1.388
2019-03-06 23:00:00	1.241
2019-03-07	1.258
2019-03-07 01:00:00	1.484
2019-03-07 02:00:00	1.813
2019-03-07 03:00:00	2.143
2019-03-07 04:00:00	2.418
2019-03-07 05:00:00	2.58
2019-03-07 06:00:00	2.59
2019-03-07 07:00:00	2.422
2019-03-07 08:00:00	2.204
2019-03-07 09:00:00	1.93
2019-03-07 10:00:00	1.73
2019-03-07 11:00:00	1.615
2019-03-07 12:00:00	1.677
2019-03-07 13:00:00	1.862
2019-03-07 14:00:00	2.158
2019-03-07 15:00:00	2.48
2019-03-07 16:00:00	2.736
2019-03-07 17:00:00	2.81
2019-03-07 18:00:00	2.736
2019-03-07 19:00:00	2.541
2019-03-07 20:00:00	2.193
2019-03-07 21:00:00	1.803
2019-03-07 22:00:00	1.515
2019-03-07 23:00:00	1.327
2019-03-08	1.277
2019-03-08 01:00:00	1.413
2019-03-08 02:00:00	1.702
2019-03-08 03:00:00	2.044
2019-03-08 04:00:00	2.325
2019-03-08 05:00:00	2.54
2019-03-08 06:00:00	2.611
2019-03-08 07:00:00	2.5
2019-03-08 08:00:00	2.305
2019-03-08 09:00:00	2.013
2019-03-08 10:00:00	1.761
2019-03-08 11:00:00	1.628
2019-03-08 12:00:00	1.549
2019-03-08 13:00:00	1.706
2019-03-08 14:00:00	1.915
2019-03-08 15:00:00	2.222
2019-03-08 16:00:00	2.521
2019-03-08 17:00:00	2.695
2019-03-08 18:00:00	2.715
2019-03-08 19:00:00	2.592
2019-03-08 20:00:00	2.324
2019-03-08 21:00:00	2.012
2019-03-08 22:00:00	1.686
2019-03-08 23:00:00	1.44
2019-03-09	1.35
2019-03-09 01:00:00	1.427
2019-03-09 02:00:00	1.652
2019-03-09 03:00:00	1.967
2019-03-09 04:00:00	2.273
2019-03-09 05:00:00	2.554
2019-03-09 06:00:00	2.654
2019-03-09 07:00:00	2.611
2019-03-09 08:00:00	2.447
2019-03-09 09:00:00	2.19
2019-03-09 10:00:00	1.894
2019-03-09 11:00:00	1.687
2019-03-09 12:00:00	1.572
2019-03-09 13:00:00	1.616
2019-03-09 14:00:00	1.761
2019-03-09 15:00:00	2.019
2019-03-09 16:00:00	2.31
2019-03-09 17:00:00	2.488
2019-03-09 18:00:00	2.615
2019-03-09 19:00:00	2.547
2019-03-09 20:00:00	2.401
2019-03-09 21:00:00	2.137
2019-03-09 22:00:00	1.859
2019-03-09 23:00:00	1.627
2019-03-10	1.5
2019-03-10 01:00:00	1.513
2019-03-10 02:00:00	1.691
2019-03-10 03:00:00	1.948
2019-03-10 04:00:00	2.243
2019-03-10 05:00:00	2.48
2019-03-10 06:00:00	2.659
2019-03-10 07:00:00	2.718
2019-03-10 08:00:00	2.617
2019-03-10 09:00:00	2.412
2019-03-10 10:00:00	2.132
2019-03-10 11:00:00	1.861
2019-03-10 12:00:00	1.687
2019-03-10 13:00:00	1.634
2019-03-10 14:00:00	1.685
2019-03-10 15:00:00	1.873
2019-03-10 16:00:00	2.099
2019-03-10 17:00:00	2.318
2019-03-10 18:00:00	2.457
2019-03-10 19:00:00	2.524
2019-03-10 20:00:00	2.438
2019-03-10 21:00:00	2.264
2019-03-10 22:00:00	2.048
2019-03-10 23:00:00	1.848
2019-03-11	1.706
2019-03-11 01:00:00	1.677
2019-03-11 02:00:00	1.764
2019-03-11 03:00:00	1.95
2019-03-11 04:00:00	2.204
2019-03-11 05:00:00	2.478
2019-03-11 06:00:00	2.651
2019-03-11 07:00:00	2.75
2019-03-11 08:00:00	2.72
2019-03-11 09:00:00	2.57
2019-03-11 10:00:00	2.328
2019-03-11 11:00:00	2.071
2019-03-11 12:00:00	1.844
2019-03-11 13:00:00	1.728
2019-03-11 14:00:00	1.712
2019-03-11 15:00:00	1.772
2019-03-11 16:00:00	1.928
2019-03-11 17:00:00	2.093
2019-03-11 18:00:00	2.264
2019-03-11 19:00:00	2.376
2019-03-11 20:00:00	2.398
2019-03-11 21:00:00	2.325
2019-03-11 22:00:00	2.201
2019-03-11 23:00:00	2.052
2019-03-12	1.931
2019-03-12 01:00:00	1.872
2019-03-12 02:00:00	1.901
2019-03-12 03:00:00	2.027
2019-03-12 04:00:00	2.216
2019-03-12 05:00:00	2.428
2019-03-12 06:00:00	2.613
2019-03-12 07:00:00	2.728
2019-03-12 08:00:00	2.782
2019-03-12 09:00:00	2.713
2019-03-12 10:00:00	2.547
2019-03-12 11:00:00	2.324
2019-03-12 12:00:00	2.091
2019-03-12 13:00:00	1.889
2019-03-12 14:00:00	1.769
2019-03-12 15:00:00	1.734
2019-03-12 16:00:00	1.793
2019-03-12 17:00:00	1.883
2019-03-12 18:00:00	2.027
2019-03-12 19:00:00	2.149
2019-03-12 20:00:00	2.215
2019-03-12 21:00:00	2.239
2019-03-12 22:00:00	2.216
2019-03-12 23:00:00	2.139
2019-03-13	2.07
2019-03-13 01:00:00	2.03
2019-03-13 02:00:00	2.035
2019-03-13 03:00:00	2.076
2019-03-13 04:00:00	2.108
2019-03-13 05:00:00	2.287
2019-03-13 06:00:00	2.479
2019-03-13 07:00:00	2.628
2019-03-13 08:00:00	2.654
2019-03-13 09:00:00	2.714
2019-03-13 10:00:00	2.562
2019-03-13 11:00:00	2.504
2019-03-13 12:00:00	2.292
2019-03-13 13:00:00	2.092
2019-03-13 14:00:00	1.804
2019-03-13 15:00:00	1.67
2019-03-13 16:00:00	1.65
2019-03-13 17:00:00	1.648
2019-03-13 18:00:00	1.648
2019-03-13 19:00:00	1.774
2019-03-13 20:00:00	1.897
2019-03-13 21:00:00	1.981
2019-03-13 22:00:00	2.077
2019-03-13 23:00:00	2.118
2019-03-14	2.089
2019-03-14 01:00:00	2.106
2019-03-14 02:00:00	2.066
2019-03-14 03:00:00	2.062
2019-03-14 04:00:00	2.112
2019-03-14 05:00:00	2.188
2019-03-14 06:00:00	2.304
2019-03-14 07:00:00	2.428
2019-03-14 08:00:00	2.569
2019-03-14 09:00:00	2.653
2019-03-14 10:00:00	2.699
2019-03-14 11:00:00	2.659
2019-03-14 12:00:00	2.522
2019-03-14 13:00:00	2.32
2019-03-14 14:00:00	2.101
2019-03-14 15:00:00	1.866
2019-03-14 16:00:00	1.676
2019-03-14 17:00:00	1.538
2019-03-14 18:00:00	1.487
2019-03-14 19:00:00	1.497
2019-03-14 20:00:00	1.604
2019-03-14 21:00:00	1.749
2019-03-14 22:00:00	1.898
2019-03-14 23:00:00	2.043
2019-03-15	2.137
2019-03-15 01:00:00	2.186
2019-03-15 02:00:00	2.213
2019-03-15 03:00:00	2.17
2019-03-15 04:00:00	2.15
2019-03-15 05:00:00	2.143
2019-03-15 06:00:00	2.163
2019-03-15 07:00:00	2.26
2019-03-15 08:00:00	2.381
2019-03-15 09:00:00	2.534
2019-03-15 10:00:00	2.666
2019-03-15 11:00:00	2.746
2019-03-15 12:00:00	2.745
2019-03-15 13:00:00	2.644
2019-03-15 14:00:00	2.465
2019-03-15 15:00:00	2.197
2019-03-15 16:00:00	1.912
2019-03-15 17:00:00	1.669
2019-03-15 18:00:00	1.501
2019-03-15 19:00:00	1.402
2019-03-15 20:00:00	1.42
2019-03-15 21:00:00	1.531
2019-03-15 22:00:00	1.72
2019-03-15 23:00:00	1.945
2019-03-16	2.148
2019-03-16 01:00:00	2.314
2019-03-16 02:00:00	2.389
2019-03-16 03:00:00	2.376
2019-03-16 04:00:00	2.323
2019-03-16 05:00:00	2.229
2019-03-16 06:00:00	2.156
2019-03-16 07:00:00	2.143
2019-03-16 08:00:00	2.215
2019-03-16 09:00:00	2.349
2019-03-16 10:00:00	2.527
2019-03-16 11:00:00	2.705
2019-03-16 12:00:00	2.849
2019-03-16 13:00:00	2.879
2019-03-16 14:00:00	2.785
2019-03-16 15:00:00	2.587
2019-03-16 16:00:00	2.277
2019-03-16 17:00:00	1.926
2019-03-16 18:00:00	1.6
2019-03-16 19:00:00	1.353
2019-03-16 20:00:00	1.259
2019-03-16 21:00:00	1.289
2019-03-16 22:00:00	1.475
2019-03-16 23:00:00	1.738
2019-03-17	2.025
2019-03-17 01:00:00	2.308
2019-03-17 02:00:00	2.501
2019-03-17 03:00:00	2.548
2019-03-17 04:00:00	2.479
2019-03-17 05:00:00	2.335
2019-03-17 06:00:00	2.184
2019-03-17 07:00:00	2.056
2019-03-17 08:00:00	2.023
2019-03-17 09:00:00	2.105
2019-03-17 10:00:00	2.294
2019-03-17 11:00:00	2.559
2019-03-17 12:00:00	2.823
2019-03-17 13:00:00	3.008
2019-03-17 14:00:00	3.068
2019-03-17 15:00:00	2.951
2019-03-17 16:00:00	2.674
2019-03-17 17:00:00	2.261
2019-03-17 18:00:00	1.846
2019-03-17 19:00:00	1.475
2019-03-17 20:00:00	1.215
2019-03-17 21:00:00	1.148
2019-03-17 22:00:00	1.225
2019-03-17 23:00:00	1.471
2019-03-18	1.831
2019-03-18 01:00:00	2.21
2019-03-18 02:00:00	2.522
2019-03-18 03:00:00	2.687
2019-03-18 04:00:00	2.667
2019-03-18 05:00:00	2.503
2019-03-18 06:00:00	2.283
2019-03-18 07:00:00	2.048
2019-03-18 08:00:00	1.908
2019-03-18 09:00:00	1.884
2019-03-18 10:00:00	2.012
2019-03-18 11:00:00	2.27
2019-03-18 12:00:00	2.612
2019-03-18 13:00:00	2.955
2019-03-18 14:00:00	3.138
2019-03-18 15:00:00	3.199
2019-03-18 16:00:00	3.032
2019-03-18 17:00:00	2.678
2019-03-18 18:00:00	2.192
2019-03-18 19:00:00	1.696
2019-03-18 20:00:00	1.315
2019-03-18 21:00:00	1.083
2019-03-18 22:00:00	1.055
2019-03-18 23:00:00	1.26
2019-03-19	1.615
2019-03-19 01:00:00	2.045
2019-03-19 02:00:00	2.445
2019-03-19 03:00:00	2.737
2019-03-19 04:00:00	2.821
2019-03-19 05:00:00	2.719
2019-03-19 06:00:00	2.467
2019-03-19 07:00:00	2.169
2019-03-19 08:00:00	1.884
2019-03-19 09:00:00	1.73
2019-03-19 10:00:00	1.74
2019-03-19 11:00:00	1.943
2019-03-19 12:00:00	2.291
2019-03-19 13:00:00	2.689
2019-03-19 14:00:00	3.036
2019-03-19 15:00:00	3.246
2019-03-19 16:00:00	3.236
2019-03-19 17:00:00	3.013
2019-03-19 18:00:00	2.588
2019-03-19 19:00:00	2.07
2019-03-19 20:00:00	1.585
2019-03-19 21:00:00	1.209
2019-03-19 22:00:00	1.052
2019-03-19 23:00:00	1.143
2019-03-20	1.418
2019-03-20 01:00:00	1.858
2019-03-20 02:00:00	2.328
2019-03-20 03:00:00	2.692
2019-03-20 04:00:00	2.913
2019-03-20 05:00:00	2.893
2019-03-20 06:00:00	2.711
2019-03-20 07:00:00	2.372
2019-03-20 08:00:00	1.998
2019-03-20 09:00:00	1.712
2019-03-20 10:00:00	1.561
2019-03-20 11:00:00	1.615
2019-03-20 12:00:00	1.886
2019-03-20 13:00:00	2.294
2019-03-20 14:00:00	2.731
2019-03-20 15:00:00	3.087
2019-03-20 16:00:00	3.268
2019-03-20 17:00:00	3.224
2019-03-20 18:00:00	2.938
2019-03-20 19:00:00	2.457
2019-03-20 20:00:00	1.948
2019-03-20 21:00:00	1.484
2019-03-20 22:00:00	1.199
2019-03-20 23:00:00	1.113
2019-03-21	1.296
2019-03-21 01:00:00	1.661
2019-03-21 02:00:00	2.095
2019-03-21 03:00:00	2.574
2019-03-21 04:00:00	2.892
2019-03-21 05:00:00	3.028
2019-03-21 06:00:00	2.904
2019-03-21 07:00:00	2.61
2019-03-21 08:00:00	2.189
2019-03-21 09:00:00	1.809
2019-03-21 10:00:00	1.503
2019-03-21 11:00:00	1.375
2019-03-21 12:00:00	1.476
2019-03-21 13:00:00	1.783
2019-03-21 14:00:00	2.226
2019-03-21 15:00:00	2.673
2019-03-21 16:00:00	2.993
2019-03-21 17:00:00	3.136
2019-03-21 18:00:00	3.053
2019-03-21 19:00:00	2.686
2019-03-21 20:00:00	2.247
2019-03-21 21:00:00	1.804
2019-03-21 22:00:00	1.385
2019-03-21 23:00:00	1.217
2019-03-22	1.225
2019-03-22 01:00:00	1.495
2019-03-22 02:00:00	1.921
2019-03-22 03:00:00	2.403
2019-03-22 04:00:00	2.764
2019-03-22 05:00:00	3.054
2019-03-22 06:00:00	3.074
2019-03-22 07:00:00	2.858
2019-03-22 08:00:00	2.503
2019-03-22 09:00:00	2.041
2019-03-22 10:00:00	1.654
2019-03-22 11:00:00	1.366
2019-03-22 12:00:00	1.304
2019-03-22 13:00:00	1.48
2019-03-22 14:00:00	1.79
2019-03-22 15:00:00	2.201
2019-03-22 16:00:00	2.618
2019-03-22 17:00:00	2.897
2019-03-22 18:00:00	2.954
2019-03-22 19:00:00	2.81
2019-03-22 20:00:00	2.499
2019-03-22 21:00:00	2.099
2019-03-22 22:00:00	1.694
2019-03-22 23:00:00	1.431
2019-03-23	1.34
2019-03-23 01:00:00	1.458
2019-03-23 02:00:00	1.771
2019-03-23 03:00:00	2.185
2019-03-23 04:00:00	2.611
2019-03-23 05:00:00	2.927
2019-03-23 06:00:00	3.068
2019-03-23 07:00:00	3.003
2019-03-23 08:00:00	2.742
2019-03-23 09:00:00	2.334
2019-03-23 10:00:00	1.924
2019-03-23 11:00:00	1.566
2019-03-23 12:00:00	1.344
2019-03-23 13:00:00	1.339
2019-03-23 14:00:00	1.501
2019-03-23 15:00:00	1.804
2019-03-23 16:00:00	2.18
2019-03-23 17:00:00	2.513
2019-03-23 18:00:00	2.692
2019-03-23 19:00:00	2.715
2019-03-23 20:00:00	2.568
2019-03-23 21:00:00	2.313
2019-03-23 22:00:00	1.972
2019-03-23 23:00:00	1.697
2019-03-24	1.56
2019-03-24 01:00:00	1.555
2019-03-24 02:00:00	1.72
2019-03-24 03:00:00	2.015
2019-03-24 04:00:00	2.367
2019-03-24 05:00:00	2.714
2019-03-24 06:00:00	2.945
2019-03-24 07:00:00	3.005
2019-03-24 08:00:00	2.875
2019-03-24 09:00:00	2.585
2019-03-24 10:00:00	2.213
2019-03-24 11:00:00	1.84
2019-03-24 12:00:00	1.531
2019-03-24 13:00:00	1.367
2019-03-24 14:00:00	1.39
2019-03-24 15:00:00	1.529
2019-03-24 16:00:00	1.786
2019-03-24 17:00:00	2.089
2019-03-24 18:00:00	2.353
2019-03-24 19:00:00	2.467
2019-03-24 20:00:00	2.516
2019-03-24 21:00:00	2.33
2019-03-24 22:00:00	2.137
2019-03-24 23:00:00	1.92
2019-03-25	1.797
2019-03-25 01:00:00	1.715
2019-03-25 02:00:00	1.801
2019-03-25 03:00:00	1.973
2019-03-25 04:00:00	2.243
2019-03-25 05:00:00	2.52
[truncated: 6,762 more rows]

## Sheet: Mumbai
Location: Mumbai
Source: Generated from TPXO Atlas https://tpxows.azurewebsites.net/
Date Time (GMT)	Height(m)
2021-10-01 01:00:00	0.537
2021-10-01 02:00:00	0.673
2021-10-01 03:00:00	0.693
2021-10-01 04:00:00	0.608
2021-10-01 05:00:00	0.451
2021-10-01 06:00:00	0.263
2021-10-01 07:00:00	0.081
2021-10-01 08:00:00	-0.06
2021-10-01 09:00:00	-0.137
2021-10-01 10:00:00	-0.14
2021-10-01 11:00:00	-0.073
2021-10-01 12:00:00	0.035
2021-10-01 13:00:00	0.137
2021-10-01 14:00:00	0.181
2021-10-01 15:00:00	0.131
2021-10-01 16:00:00	-0.02
2021-10-01 17:00:00	-0.246
2021-10-01 18:00:00	-0.495
2021-10-01 19:00:00	-0.708
2021-10-01 20:00:00	-0.833
2021-10-01 21:00:00	-0.835
2021-10-01 22:00:00	-0.698
2021-10-01 23:00:00	-0.427
2021-10-02	-0.06
2021-10-02 01:00:00	0.342
2021-10-02 02:00:00	0.695
2021-10-02 03:00:00	0.918
2021-10-02 04:00:00	0.962
2021-10-02 05:00:00	0.823
2021-10-02 06:00:00	0.548
2021-10-02 07:00:00	0.211
2021-10-02 08:00:00	-0.108
2021-10-02 09:00:00	-0.342
2021-10-02 10:00:00	-0.449
2021-10-02 11:00:00	-0.411
2021-10-02 12:00:00	-0.242
2021-10-02 13:00:00	0.012
2021-10-02 14:00:00	0.269
2021-10-02 15:00:00	0.438
2021-10-02 16:00:00	0.443
2021-10-02 17:00:00	0.26
2021-10-02 18:00:00	-0.071
2021-10-02 19:00:00	-0.462
2021-10-02 20:00:00	-0.81
2021-10-02 21:00:00	-1.027
2021-10-02 22:00:00	-1.056
2021-10-02 23:00:00	-0.878
2021-10-03	-0.509
2021-10-03 01:00:00	-0.004
2021-10-03 02:00:00	0.539
2021-10-03 03:00:00	0.994
2021-10-03 04:00:00	1.242
2021-10-03 05:00:00	1.216
2021-10-03 06:00:00	0.927
2021-10-03 07:00:00	0.464
2021-10-03 08:00:00	-0.047
2021-10-03 09:00:00	-0.481
2021-10-03 10:00:00	-0.749
2021-10-03 11:00:00	-0.803
2021-10-03 12:00:00	-0.637
2021-10-03 13:00:00	-0.288
2021-10-03 14:00:00	0.159
2021-10-03 15:00:00	0.578
2021-10-03 16:00:00	0.828
2021-10-03 17:00:00	0.812
2021-10-03 18:00:00	0.515
2021-10-03 19:00:00	0.015
2021-10-03 20:00:00	-0.544
2021-10-03 21:00:00	-1.011
2021-10-03 22:00:00	-1.271
2021-10-03 23:00:00	-1.263
2021-10-04	-0.98
2021-10-04 01:00:00	-0.461
2021-10-04 02:00:00	0.202
2021-10-04 03:00:00	0.867
2021-10-04 04:00:00	1.362
2021-10-04 05:00:00	1.543
2021-10-04 06:00:00	1.351
2021-10-04 07:00:00	0.843
2021-10-04 08:00:00	0.167
2021-10-04 09:00:00	-0.492
2021-10-04 10:00:00	-0.979
2021-10-04 11:00:00	-1.197
2021-10-04 12:00:00	-1.112
2021-10-04 13:00:00	-0.746
2021-10-04 14:00:00	-0.173
2021-10-04 15:00:00	0.473
2021-10-04 16:00:00	1.013
2021-10-04 17:00:00	1.273
2021-10-04 18:00:00	1.154
2021-10-04 19:00:00	0.679
2021-10-04 20:00:00	-0.013
2021-10-04 21:00:00	-0.719
2021-10-04 22:00:00	-1.252
2021-10-04 23:00:00	-1.488
2021-10-05	-1.382
2021-10-05 01:00:00	-0.95
2021-10-05 02:00:00	-0.266
2021-10-05 03:00:00	0.533
2021-10-05 04:00:00	1.257
2021-10-05 05:00:00	1.702
2021-10-05 06:00:00	1.722
2021-10-05 07:00:00	1.296
2021-10-05 08:00:00	0.545
2021-10-05 09:00:00	-0.313
2021-10-05 10:00:00	-1.053
2021-10-05 11:00:00	-1.506
2021-10-05 12:00:00	-1.59
2021-10-05 13:00:00	-1.3
2021-10-05 14:00:00	-0.697
2021-10-05 15:00:00	0.099
2021-10-05 16:00:00	0.9
2021-10-05 17:00:00	1.488
2021-10-05 18:00:00	1.676
2021-10-05 19:00:00	1.391
2021-10-05 20:00:00	0.715
2021-10-05 21:00:00	-0.143
2021-10-05 22:00:00	-0.937
2021-10-05 23:00:00	-1.463
2021-10-06	-1.612
2021-10-06 01:00:00	-1.365
2021-10-06 02:00:00	-0.773
2021-10-06 03:00:00	0.049
2021-10-06 04:00:00	0.921
2021-10-06 05:00:00	1.617
2021-10-06 06:00:00	1.92
2021-10-06 07:00:00	1.711
2021-10-06 08:00:00	1.031
2021-10-06 09:00:00	0.072
2021-10-06 10:00:00	-0.893
2021-10-06 11:00:00	-1.62
2021-10-06 12:00:00	-1.953
2021-10-06 13:00:00	-1.842
2021-10-06 14:00:00	-1.322
2021-10-06 15:00:00	-0.494
2021-10-06 16:00:00	0.474
2021-10-06 17:00:00	1.354
2021-10-06 18:00:00	1.903
2021-10-06 19:00:00	1.95
2021-10-06 20:00:00	1.473
2021-10-06 21:00:00	0.624
2021-10-06 22:00:00	-0.335
2021-10-06 23:00:00	-1.134
2021-10-07	-1.581
2021-10-07 01:00:00	-1.597
2021-10-07 02:00:00	-1.2
2021-10-07 03:00:00	-0.477
2021-10-07 04:00:00	0.421
2021-10-07 05:00:00	1.282
2021-10-07 06:00:00	1.86
2021-10-07 07:00:00	1.955
2021-10-07 08:00:00	1.497
2021-10-07 09:00:00	0.599
2021-10-07 10:00:00	-0.485
2021-10-07 11:00:00	-1.457
2021-10-07 12:00:00	-2.079
2021-10-07 13:00:00	-2.232
2021-10-07 14:00:00	-1.908
2021-10-07 15:00:00	-1.179
2021-10-07 16:00:00	-0.185
2021-10-07 17:00:00	0.869
2021-10-07 18:00:00	1.733
2021-10-07 19:00:00	2.168
2021-10-07 20:00:00	2.041
2021-10-07 21:00:00	1.395
2021-10-07 22:00:00	0.44
2021-10-07 23:00:00	-0.529
2021-10-08	-1.25
2021-10-08 01:00:00	-1.565
2021-10-08 02:00:00	-1.437
2021-10-08 03:00:00	-0.919
2021-10-08 04:00:00	-0.125
2021-10-08 05:00:00	0.768
2021-10-08 06:00:00	1.532
2021-10-08 07:00:00	1.927
2021-10-08 08:00:00	1.792
2021-10-08 09:00:00	1.121
2021-10-08 10:00:00	0.09
2021-10-08 11:00:00	-1.011
2021-10-08 12:00:00	-1.889
2021-10-08 13:00:00	-2.342
2021-10-08 14:00:00	-2.298
2021-10-08 15:00:00	-1.788
2021-10-08 16:00:00	-0.918
2021-10-08 17:00:00	0.149
2021-10-08 18:00:00	1.191
2021-10-08 19:00:00	1.955
2021-10-08 20:00:00	2.231
2021-10-08 21:00:00	1.943
2021-10-08 22:00:00	1.192
2021-10-08 23:00:00	0.227
2021-10-09	-0.661
2021-10-09 01:00:00	-1.243
2021-10-09 02:00:00	-1.41
2021-10-09 03:00:00	-1.163
2021-10-09 04:00:00	-0.58
2021-10-09 05:00:00	0.206
2021-10-09 06:00:00	1.012
2021-10-09 07:00:00	1.615
2021-10-09 08:00:00	1.804
2021-10-09 09:00:00	1.47
2021-10-09 10:00:00	0.669
2021-10-09 11:00:00	-0.383
2021-10-09 12:00:00	-1.394
2021-10-09 13:00:00	-2.106
2021-10-09 14:00:00	-2.369
2021-10-09 15:00:00	-2.158
2021-10-09 16:00:00	-1.533
2021-10-09 17:00:00	-0.616
2021-10-09 18:00:00	0.422
2021-10-09 19:00:00	1.362
2021-10-09 20:00:00	1.974
2021-10-09 21:00:00	2.094
2021-10-09 22:00:00	1.7
2021-10-09 23:00:00	0.936
2021-10-10	0.055
2021-10-10 01:00:00	-0.683
2021-10-10 02:00:00	-1.103
2021-10-10 03:00:00	-1.143
2021-10-10 04:00:00	-0.834
2021-10-10 05:00:00	-0.263
2021-10-10 06:00:00	0.44
2021-10-10 07:00:00	1.098
2021-10-10 08:00:00	1.514
2021-10-10 09:00:00	1.522
2021-10-10 10:00:00	1.065
2021-10-10 11:00:00	0.243
2021-10-10 12:00:00	-0.721
2021-10-10 13:00:00	-1.563
2021-10-10 14:00:00	-2.081
2021-10-10 15:00:00	-2.181
2021-10-10 16:00:00	-1.871
2021-10-10 17:00:00	-1.224
2021-10-10 18:00:00	-0.358
2021-10-10 19:00:00	0.565
2021-10-10 20:00:00	1.348
2021-10-10 21:00:00	1.801
2021-10-10 22:00:00	1.81
2021-10-10 23:00:00	1.394
2021-10-11	0.709
2021-10-11 01:00:00	-0.017
2021-10-11 02:00:00	-0.58
2021-10-11 03:00:00	-0.858
2021-10-11 04:00:00	-0.827
2021-10-11 05:00:00	-0.527
2021-10-11 06:00:00	-0.039
2021-10-11 07:00:00	0.522
2021-10-11 08:00:00	1.008
2021-10-11 09:00:00	1.257
2021-10-11 10:00:00	1.149
2021-10-11 11:00:00	0.671
2021-10-11 12:00:00	-0.065
2021-10-11 13:00:00	-0.858
2021-10-11 14:00:00	-1.499
2021-10-11 15:00:00	-1.846
2021-10-11 16:00:00	-1.847
2021-10-11 17:00:00	-1.525
2021-10-11 18:00:00	-0.945
2021-10-11 19:00:00	-0.209
2021-10-11 20:00:00	0.55
2021-10-11 21:00:00	1.169
2021-10-11 22:00:00	1.501
2021-10-11 23:00:00	1.472
2021-10-12	1.119
2021-10-12 01:00:00	0.581
2021-10-12 02:00:00	0.036
2021-10-12 03:00:00	-0.372
2021-10-12 04:00:00	-0.565
2021-10-12 05:00:00	-0.536
2021-10-12 06:00:00	-0.316
2021-10-12 07:00:00	0.036
2021-10-12 08:00:00	0.436
2021-10-12 09:00:00	0.767
2021-10-12 10:00:00	0.908
2021-10-12 11:00:00	0.777
2021-10-12 12:00:00	0.377
2021-10-12 13:00:00	-0.194
2021-10-12 14:00:00	-0.782
2021-10-12 15:00:00	-1.242
2021-10-12 16:00:00	-1.479
2021-10-12 17:00:00	-1.463
2021-10-12 18:00:00	-1.211
2021-10-12 19:00:00	-0.765
2021-10-12 20:00:00	-0.195
2021-10-12 21:00:00	0.398
2021-10-12 22:00:00	0.889
2021-10-12 23:00:00	1.168
2021-10-13	1.18
2021-10-13 01:00:00	0.954
2021-10-13 02:00:00	0.586
2021-10-13 03:00:00	0.196
2021-10-13 04:00:00	-0.118
2021-10-13 05:00:00	-0.304
2021-10-13 06:00:00	-0.347
2021-10-13 07:00:00	-0.255
2021-10-13 08:00:00	-0.053
2021-10-13 09:00:00	0.205
2021-10-13 10:00:00	0.438
2021-10-13 11:00:00	0.555
2021-10-13 12:00:00	0.493
2021-10-13 13:00:00	0.245
2021-10-13 14:00:00	-0.129
2021-10-13 15:00:00	-0.534
2021-10-13 16:00:00	-0.874
2021-10-13 17:00:00	-1.082
2021-10-13 18:00:00	-1.126
2021-10-13 19:00:00	-0.998
2021-10-13 20:00:00	-0.71
2021-10-13 21:00:00	-0.297
2021-10-13 22:00:00	0.172
2021-10-13 23:00:00	0.603
2021-10-14	0.904
2021-10-14 01:00:00	1.015
2021-10-14 02:00:00	0.933
2021-10-14 03:00:00	0.705
2021-10-14 04:00:00	0.404
2021-10-14 05:00:00	0.1
2021-10-14 06:00:00	-0.152
2021-10-14 07:00:00	-0.314
2021-10-14 08:00:00	-0.359
2021-10-14 09:00:00	-0.283
2021-10-14 10:00:00	-0.108
2021-10-14 11:00:00	0.108
2021-10-14 12:00:00	0.289
2021-10-14 13:00:00	0.364
2021-10-14 14:00:00	0.296
2021-10-14 15:00:00	0.095
2021-10-14 16:00:00	-0.191
2021-10-14 17:00:00	-0.494
2021-10-14 18:00:00	-0.75
2021-10-14 19:00:00	-0.905
2021-10-14 20:00:00	-0.917
2021-10-14 21:00:00	-0.766
2021-10-14 22:00:00	-0.459
2021-10-14 23:00:00	-0.043
2021-10-15	0.402
2021-10-15 01:00:00	0.779
2021-10-15 02:00:00	1.006
2021-10-15 03:00:00	1.036
2021-10-15 04:00:00	0.877
2021-10-15 05:00:00	0.574
2021-10-15 06:00:00	0.2
2021-10-15 07:00:00	-0.165
2021-10-15 08:00:00	-0.452
2021-10-15 09:00:00	-0.604
2021-10-15 10:00:00	-0.589
2021-10-15 11:00:00	-0.414
2021-10-15 12:00:00	-0.129
2021-10-15 13:00:00	0.181
2021-10-15 14:00:00	0.419
2021-10-15 15:00:00	0.506
2021-10-15 16:00:00	0.41
2021-10-15 17:00:00	0.154
2021-10-15 18:00:00	-0.196
2021-10-15 19:00:00	-0.552
2021-10-15 20:00:00	-0.827
2021-10-15 21:00:00	-0.951
2021-10-15 22:00:00	-0.88
2021-10-15 23:00:00	-0.605
2021-10-16	-0.167
2021-10-16 01:00:00	0.348
2021-10-16 02:00:00	0.819
2021-10-16 03:00:00	1.129
2021-10-16 04:00:00	1.197
2021-10-16 05:00:00	1.01
2021-10-16 06:00:00	0.621
2021-10-16 07:00:00	0.127
2021-10-16 08:00:00	-0.359
2021-10-16 09:00:00	-0.734
2021-10-16 10:00:00	-0.922
2021-10-16 11:00:00	-0.883
2021-10-16 12:00:00	-0.621
2021-10-16 13:00:00	-0.201
2021-10-16 14:00:00	0.265
2021-10-16 15:00:00	0.642
2021-10-16 16:00:00	0.813
2021-10-16 17:00:00	0.727
2021-10-16 18:00:00	0.412
2021-10-16 19:00:00	-0.042
2021-10-16 20:00:00	-0.51
2021-10-16 21:00:00	-0.877
2021-10-16 22:00:00	-1.053
2021-10-16 23:00:00	-0.984
2021-10-17	-0.665
2021-10-17 01:00:00	-0.147
2021-10-17 02:00:00	0.456
2021-10-17 03:00:00	0.993
2021-10-17 04:00:00	1.312
2021-10-17 05:00:00	1.321
2021-10-17 06:00:00	1.018
2021-10-17 07:00:00	0.487
2021-10-17 08:00:00	-0.134
2021-10-17 09:00:00	-0.7
2021-10-17 10:00:00	-1.091
2021-10-17 11:00:00	-1.226
2021-10-17 12:00:00	-1.073
2021-10-17 13:00:00	-0.658
2021-10-17 14:00:00	-0.073
2021-10-17 15:00:00	0.528
2021-10-17 16:00:00	0.974
2021-10-17 17:00:00	1.132
2021-10-17 18:00:00	0.962
2021-10-17 19:00:00	0.522
2021-10-17 20:00:00	-0.053
2021-10-17 21:00:00	-0.606
2021-10-17 22:00:00	-1.004
2021-10-17 23:00:00	-1.154
2021-10-18	-1.012
2021-10-18 01:00:00	-0.592
2021-10-18 02:00:00	0.026
2021-10-18 03:00:00	0.693
2021-10-18 04:00:00	1.226
2021-10-18 05:00:00	1.461
2021-10-18 06:00:00	1.321
2021-10-18 07:00:00	0.843
2021-10-18 08:00:00	0.163
2021-10-18 09:00:00	-0.544
2021-10-18 10:00:00	-1.114
2021-10-18 11:00:00	-1.429
2021-10-18 12:00:00	-1.423
2021-10-18 13:00:00	-1.09
2021-10-18 14:00:00	-0.492
2021-10-18 15:00:00	0.238
2021-10-18 16:00:00	0.907
2021-10-18 17:00:00	1.326
2021-10-18 18:00:00	1.375
2021-10-18 19:00:00	1.049
2021-10-18 20:00:00	0.463
2021-10-18 21:00:00	-0.207
2021-10-18 22:00:00	-0.786
2021-10-18 23:00:00	-1.138
2021-10-19	-1.19
2021-10-19 01:00:00	-0.922
2021-10-19 02:00:00	-0.38
2021-10-19 03:00:00	0.317
2021-10-19 04:00:00	0.986
2021-10-19 05:00:00	1.425
2021-10-19 06:00:00	1.488
2021-10-19 07:00:00	1.141
2021-10-19 08:00:00	0.482
2021-10-19 09:00:00	-0.305
2021-10-19 10:00:00	-1.019
2021-10-19 11:00:00	-1.501
2021-10-19 12:00:00	-1.654
2021-10-19 13:00:00	-1.446
2021-10-19 14:00:00	-0.908
2021-10-19 15:00:00	-0.144
2021-10-19 16:00:00	0.667
2021-10-19 17:00:00	1.311
2021-10-19 18:00:00	1.605
2021-10-19 19:00:00	1.469
2021-10-19 20:00:00	0.964
2021-10-19 21:00:00	0.256
2021-10-19 22:00:00	-0.449
2021-10-19 23:00:00	-0.976
2021-10-20	-1.213
2021-10-20 01:00:00	-1.116
2021-10-20 02:00:00	-0.704
2021-10-20 03:00:00	-0.06
2021-10-20 04:00:00	0.658
2021-10-20 05:00:00	1.245
2021-10-20 06:00:00	1.507
2021-10-20 07:00:00	1.34
2021-10-20 08:00:00	0.779
2021-10-20 09:00:00	-0.018
2021-10-20 10:00:00	-0.83
2021-10-20 11:00:00	-1.458
2021-10-20 12:00:00	-1.768
2021-10-20 13:00:00	-1.702
2021-10-20 14:00:00	-1.271
2021-10-20 15:00:00	-0.548
2021-10-20 16:00:00	0.317
2021-10-20 17:00:00	1.117
2021-10-20 18:00:00	1.637
2021-10-20 19:00:00	1.73
2021-10-20 20:00:00	1.383
2021-10-20 21:00:00	0.722
2021-10-20 22:00:00	-0.044
2021-10-20 23:00:00	-0.703
2021-10-21	-1.106
2021-10-21 01:00:00	-1.18
2021-10-21 02:00:00	-0.92
2021-10-21 03:00:00	-0.384
2021-10-21 04:00:00	0.307
2021-10-21 05:00:00	0.968
2021-10-21 06:00:00	1.392
2021-10-21 07:00:00	1.421
2021-10-21 08:00:00	1.016
2021-10-21 09:00:00	0.284
2021-10-21 10:00:00	-0.566
2021-10-21 11:00:00	-1.306
2021-10-21 12:00:00	-1.763
2021-10-21 13:00:00	-1.849
2021-10-21 14:00:00	-1.551
2021-10-21 15:00:00	-0.924
2021-10-21 16:00:00	-0.083
2021-10-21 17:00:00	0.792
2021-10-21 18:00:00	1.484
2021-10-21 19:00:00	1.803
2021-10-21 20:00:00	1.665
2021-10-21 21:00:00	1.13
2021-10-21 22:00:00	0.38
2021-10-21 23:00:00	-0.357
2021-10-22	-0.895
2021-10-22 01:00:00	-1.125
2021-10-22 02:00:00	-1.023
2021-10-22 03:00:00	-0.622
2021-10-22 04:00:00	-0.016
2021-10-22 05:00:00	0.647
2021-10-22 06:00:00	1.173
2021-10-22 07:00:00	1.377
2021-10-22 08:00:00	1.16
2021-10-22 09:00:00	0.559
2021-10-22 10:00:00	-0.258
2021-10-22 11:00:00	-1.061
2021-10-22 12:00:00	-1.641
2021-10-22 13:00:00	-1.875
2021-10-22 14:00:00	-1.726
2021-10-22 15:00:00	-1.229
2021-10-22 16:00:00	-0.474
2021-10-22 17:00:00	0.393
2021-10-22 18:00:00	1.181
2021-10-22 19:00:00	1.686
2021-10-22 20:00:00	1.77
2021-10-22 21:00:00	1.422
2021-10-22 22:00:00	0.767
2021-10-22 23:00:00	0.021
2021-10-23	-0.605
2021-10-23 01:00:00	-0.968
2021-10-23 02:00:00	-1.013
2021-10-23 03:00:00	-0.758
2021-10-23 04:00:00	-0.272
2021-10-23 05:00:00	0.33
2021-10-23 06:00:00	0.889
2021-10-23 07:00:00	1.222
2021-10-23 08:00:00	1.192
2021-10-23 09:00:00	0.766
2021-10-23 10:00:00	0.05
2021-10-23 11:00:00	-0.75
2021-10-23 12:00:00	-1.414
2021-10-23 13:00:00	-1.78
2021-10-23 14:00:00	-1.782
2021-10-23 15:00:00	-1.434
2021-10-23 16:00:00	-0.808
2021-10-23 17:00:00	-0.015
2021-10-23 18:00:00	0.786
2021-10-23 19:00:00	1.409
2021-10-23 20:00:00	1.691
2021-10-23 21:00:00	1.557
2021-10-23 22:00:00	1.064
2021-10-23 23:00:00	0.383
2021-10-24	-0.271
2021-10-24 01:00:00	-0.728
2021-10-24 02:00:00	-0.901
2021-10-24 03:00:00	-0.786
2021-10-24 04:00:00	-0.436
2021-10-24 05:00:00	0.063
2021-10-24 06:00:00	0.589
2021-10-24 07:00:00	0.986
2021-10-24 08:00:00	1.107
2021-10-24 09:00:00	0.869
2021-10-24 10:00:00	0.309
2021-10-24 11:00:00	-0.421
2021-10-24 12:00:00	-1.111
2021-10-24 13:00:00	-1.576
2021-10-24 14:00:00	-1.717
2021-10-24 15:00:00	-1.523
2021-10-24 16:00:00	-1.046
2021-10-24 17:00:00	-0.377
2021-10-24 18:00:00	0.365
2021-10-24 19:00:00	1.027
2021-10-24 20:00:00	1.451
2021-10-24 21:00:00	1.522
2021-10-24 22:00:00	1.229
2021-10-24 23:00:00	0.683
2021-10-25	0.067
2021-10-25 01:00:00	-0.434
2021-10-25 02:00:00	-0.704
2021-10-25 03:00:00	-0.713
2021-10-25 04:00:00	-0.497
2021-10-25 05:00:00	-0.123
2021-10-25 06:00:00	0.319
2021-10-25 07:00:00	0.712
2021-10-25 08:00:00	0.926
2021-10-25 09:00:00	0.856
2021-10-25 10:00:00	0.477
2021-10-25 11:00:00	-0.123
2021-10-25 12:00:00	-0.775
2021-10-25 13:00:00	-1.293
2021-10-25 14:00:00	-1.547
2021-10-25 15:00:00	-1.498
2021-10-25 16:00:00	-1.176
2021-10-25 17:00:00	-0.653
2021-10-25 18:00:00	-0.021
2021-10-25 19:00:00	0.607
2021-10-25 20:00:00	1.099
2021-10-25 21:00:00	1.333
2021-10-25 22:00:00	1.248
2021-10-25 23:00:00	0.885
2021-10-26	0.374
2021-10-26 01:00:00	-0.114
2021-10-26 02:00:00	-0.444
2021-10-26 03:00:00	-0.556
2021-10-26 04:00:00	-0.463
2021-10-26 05:00:00	-0.217
2021-10-26 06:00:00	0.113
2021-10-26 07:00:00	0.447
2021-10-26 08:00:00	0.688
2021-10-26 09:00:00	0.737
2021-10-26 10:00:00	0.534
2021-10-26 11:00:00	0.101
2021-10-26 12:00:00	-0.451
2021-10-26 13:00:00	-0.963
2021-10-26 14:00:00	-1.295
2021-10-26 15:00:00	-1.372
2021-10-26 16:00:00	-1.2
2021-10-26 17:00:00	-0.83
2021-10-26 18:00:00	-0.335
2021-10-26 19:00:00	0.205
2021-10-26 20:00:00	0.695
2021-10-26 21:00:00	1.03
2021-10-26 22:00:00	1.127
2021-10-26 23:00:00	0.968
2021-10-27	0.617
2021-10-27 01:00:00	0.203
2021-10-27 02:00:00	-0.142
2021-10-27 03:00:00	-0.331
2021-10-27 04:00:00	-0.35
2021-10-27 05:00:00	-0.229
2021-10-27 06:00:00	-0.022
2021-10-27 07:00:00	0.219
2021-10-27 08:00:00	0.43
2021-10-27 09:00:00	0.54
2021-10-27 10:00:00	0.481
2021-10-27 11:00:00	0.228
2021-10-27 12:00:00	-0.174
2021-10-27 13:00:00	-0.618
2021-10-27 14:00:00	-0.975
2021-10-27 15:00:00	-1.154
2021-10-27 16:00:00	-1.123
2021-10-27 17:00:00	-0.909
2021-10-27 18:00:00	-0.564
2021-10-27 19:00:00	-0.145
2021-10-27 20:00:00	0.286
2021-10-27 21:00:00	0.656
2021-10-27 22:00:00	0.886
2021-10-27 23:00:00	0.923
2021-10-28	0.768
2021-10-28 01:00:00	0.488
2021-10-28 02:00:00	0.184
2021-10-28 03:00:00	-0.05
2021-10-28 04:00:00	-0.168
2021-10-28 05:00:00	-0.174
2021-10-28 06:00:00	-0.095
2021-10-28 07:00:00	0.033
2021-10-28 08:00:00	0.176
2021-10-28 09:00:00	0.293
2021-10-28 10:00:00	0.331
2021-10-28 11:00:00	0.245
2021-10-28 12:00:00	0.025
2021-10-28 13:00:00	-0.286
2021-10-28 14:00:00	-0.603
2021-10-28 15:00:00	-0.838
2021-10-28 16:00:00	-0.935
2021-10-28 17:00:00	-0.881
2021-10-28 18:00:00	-0.7
2021-10-28 19:00:00	-0.426
2021-10-28 20:00:00	-0.095
2021-10-28 21:00:00	0.25
2021-10-28 22:00:00	0.553
2021-10-28 23:00:00	0.75
2021-10-29	0.801
2021-10-29 01:00:00	0.705
2021-10-29 02:00:00	0.507
2021-10-29 03:00:00	0.28
2021-10-29 04:00:00	0.083
2021-10-29 05:00:00	-0.051
2021-10-29 06:00:00	-0.115
2021-10-29 07:00:00	-0.12
2021-10-29 08:00:00	-0.074
2021-10-29 09:00:00	0.007
2021-10-29 10:00:00	0.094
2021-10-29 11:00:00	0.144
2021-10-29 12:00:00	0.117
2021-10-29 13:00:00	-0.007
2021-10-29 14:00:00	-0.204
2021-10-29 15:00:00	-0.424
2021-10-29 16:00:00	-0.608
2021-10-29 17:00:00	-0.71
2021-10-29 18:00:00	-0.713
2021-10-29 19:00:00	-0.615
2021-10-29 20:00:00	-0.424
2021-10-29 21:00:00	-0.158
2021-10-29 22:00:00	0.153
2021-10-29 23:00:00	0.456
2021-10-30	0.692
2021-10-30 01:00:00	0.808
2021-10-30 02:00:00	0.782
2021-10-30 03:00:00	0.633
2021-10-30 04:00:00	0.406
2021-10-30 05:00:00	0.157
2021-10-30 06:00:00	-0.067
2021-10-30 07:00:00	-0.234
2021-10-30 08:00:00	-0.321
2021-10-30 09:00:00	-0.319
2021-10-30 10:00:00	-0.231
2021-10-30 11:00:00	-0.087
2021-10-30 12:00:00	0.064
2021-10-30 13:00:00	0.162
2021-10-30 14:00:00	0.164
2021-10-30 15:00:00	0.057
2021-10-30 16:00:00	-0.133
2021-10-30 17:00:00	-0.354
2021-10-30 18:00:00	-0.546
2021-10-30 19:00:00	-0.658
2021-10-30 20:00:00	-0.658
2021-10-30 21:00:00	-0.529
2021-10-30 22:00:00	-0.279
2021-10-30 23:00:00	0.06
2021-10-31	0.43
2021-10-31 01:00:00	0.751
2021-10-31 02:00:00	0.944
2021-10-31 03:00:00	0.957
2021-10-31 04:00:00	0.784
2021-10-31 05:00:00	0.469
2021-10-31 06:00:00	0.089
2021-10-31 07:00:00	-0.272
2021-10-31 08:00:00	-0.542
2021-10-31 09:00:00	-0.671
2021-10-31 10:00:00	-0.64
2021-10-31 11:00:00	-0.458
2021-10-31 12:00:00	-0.169
2021-10-31 13:00:00	0.15
2021-10-31 14:00:00	0.407
2021-10-31 15:00:00	0.518
2021-10-31 16:00:00	0.441
2021-10-31 17:00:00	0.197
2021-10-31 18:00:00	-0.144
2021-10-31 19:00:00	-0.482
2021-10-31 20:00:00	-0.722
2021-10-31 21:00:00	-0.8
2021-10-31 22:00:00	-0.688
2021-10-31 23:00:00	-0.395
2021-11-01	0.032
2021-11-01 01:00:00	0.511
2021-11-01 02:00:00	0.928
2021-11-01 03:00:00	1.168
2021-11-01 04:00:00	1.152
2021-11-01 05:00:00	0.869
2021-11-01 06:00:00	0.388
2021-11-01 07:00:00	-0.169
2021-11-01 08:00:00	-0.666
2021-11-01 09:00:00	-0.996
2021-11-01 10:00:00	-1.097
2021-11-01 11:00:00	-0.953
2021-11-01 12:00:00	-0.595
2021-11-01 13:00:00	-0.098
2021-11-01 14:00:00	0.421
2021-11-01 15:00:00	0.825
2021-11-01 16:00:00	0.991
2021-11-01 17:00:00	0.865
2021-11-01 18:00:00	0.485
2021-11-01 19:00:00	-0.031
2021-11-01 20:00:00	-0.53
2021-11-01 21:00:00	-0.877
2021-11-01 22:00:00	-0.988
2021-11-01 23:00:00	-0.837
2021-11-02	-0.449
2021-11-02 01:00:00	0.102
2021-11-02 02:00:00	0.697
2021-11-02 03:00:00	1.184
2021-11-02 04:00:00	1.411
2021-11-02 05:00:00	1.285
2021-11-02 06:00:00	0.819
2021-11-02 07:00:00	0.129
2021-11-02 08:00:00	-0.602
2021-11-02 09:00:00	-1.192
2021-11-02 10:00:00	-1.513
2021-11-02 11:00:00	-1.506
2021-11-02 12:00:00	-1.177
2021-11-02 13:00:00	-0.59
2021-11-02 14:00:00	0.139
2021-11-02 15:00:00	0.844
2021-11-02 16:00:00	1.341
2021-11-02 17:00:00	1.485
2021-11-02 18:00:00	1.233
2021-11-02 19:00:00	0.667
2021-11-02 20:00:00	-0.036
2021-11-02 21:00:00	-0.67
2021-11-02 22:00:00	-1.072
2021-11-02 23:00:00	-1.158
2021-11-03	-0.919
2021-11-03 01:00:00	-0.406
2021-11-03 02:00:00	0.273
2021-11-03 03:00:00	0.958
2021-11-03 04:00:00	1.457
2021-11-03 05:00:00	1.596
2021-11-03 06:00:00	1.293
2021-11-03 07:00:00	0.605
2021-11-03 08:00:00	-0.287
2021-11-03 09:00:00	-1.145
2021-11-03 10:00:00	-1.755
2021-11-03 11:00:00	-1.989
2021-11-03 12:00:00	-1.809
2021-11-03 13:00:00	-1.254
2021-11-03 14:00:00	-0.427
2021-11-03 15:00:00	0.508
2021-11-03 16:00:00	1.339
2021-11-03 17:00:00	1.851
2021-11-03 18:00:00	1.896
2021-11-03 19:00:00	1.467
2021-11-03 20:00:00	0.707
2021-11-03 21:00:00	-0.148
2021-11-03 22:00:00	-0.856
2021-11-03 23:00:00	-1.248
2021-11-04	-1.258
2021-11-04 01:00:00	-0.901
2021-11-04 02:00:00	-0.262
2021-11-04 03:00:00	0.517
2021-11-04 04:00:00	1.237
2021-11-04 05:00:00	1.677
2021-11-04 06:00:00	1.664
2021-11-04 07:00:00	1.149
2021-11-04 08:00:00	0.25
2021-11-04 09:00:00	-0.791
2021-11-04 10:00:00	-1.694
2021-11-04 11:00:00	-2.243
2021-11-04 12:00:00	-2.327
2021-11-04 13:00:00	-1.943
2021-11-04 14:00:00	-1.167
2021-11-04 15:00:00	-0.141
2021-11-04 16:00:00	0.932
2021-11-04 17:00:00	1.805
2021-11-04 18:00:00	2.248
2021-11-04 19:00:00	2.14
2021-11-04 20:00:00	1.527
2021-11-04 21:00:00	0.611
2021-11-04 22:00:00	-0.324
2021-11-04 23:00:00	-1.029
2021-11-05	-1.351

## Sheet: New York
Location: New York
Source:
Date Time (GMT)	Height(m)
2019-01-01 01:00:00	1.957
2019-01-01 02:00:00	1.813
2019-01-01 03:00:00	1.768
2019-01-01 04:00:00	1.998
2019-01-01 05:00:00	2.371
2019-01-01 06:00:00	2.761
2019-01-01 07:00:00	2.867
2019-01-01 08:00:00	3.062
2019-01-01 09:00:00	3.05
2019-01-01 10:00:00	2.95
2019-01-01 11:00:00	2.737
2019-01-01 12:00:00	2.418
2019-01-01 13:00:00	2.138
2019-01-01 14:00:00	1.877
2019-01-01 15:00:00	1.678
2019-01-01 16:00:00	1.743
2019-01-01 17:00:00	1.897
2019-01-01 18:00:00	2.217
2019-01-01 19:00:00	2.379
2019-01-01 20:00:00	2.51
2019-01-01 21:00:00	2.647
2019-01-01 22:00:00	2.661
2019-01-01 23:00:00	2.517
2019-01-02	2.154
2019-01-02 01:00:00	1.89
2019-01-02 02:00:00	1.588
2019-01-02 03:00:00	1.497
2019-01-02 04:00:00	1.582
2019-01-02 05:00:00	1.77
2019-01-02 06:00:00	2.123
2019-01-02 07:00:00	2.386
2019-01-02 08:00:00	2.71
2019-01-02 09:00:00	2.872
2019-01-02 10:00:00	2.886
2019-01-02 11:00:00	2.735
2019-01-02 12:00:00	2.586
2019-01-02 13:00:00	2.294
2019-01-02 14:00:00	1.958
2019-01-02 15:00:00	1.796
2019-01-02 16:00:00	1.723
2019-01-02 17:00:00	1.822
2019-01-02 18:00:00	1.966
2019-01-02 19:00:00	2.257
2019-01-02 20:00:00	2.53
2019-01-02 21:00:00	2.752
2019-01-02 22:00:00	2.844
2019-01-02 23:00:00	2.744
2019-01-03	2.602
2019-01-03 01:00:00	2.217
2019-01-03 02:00:00	1.982
2019-01-03 03:00:00	1.85
2019-01-03 04:00:00	1.766
2019-01-03 05:00:00	1.853
2019-01-03 06:00:00	2.026
2019-01-03 07:00:00	2.438
2019-01-03 08:00:00	2.714
2019-01-03 09:00:00	2.96
2019-01-03 10:00:00	3.021
2019-01-03 11:00:00	2.982
2019-01-03 12:00:00	2.936
2019-01-03 13:00:00	2.71
2019-01-03 14:00:00	2.379
2019-01-03 15:00:00	1.972
2019-01-03 16:00:00	1.737
2019-01-03 17:00:00	1.698
2019-01-03 18:00:00	1.798
2019-01-03 19:00:00	2.003
2019-01-03 20:00:00	2.288
2019-01-03 21:00:00	2.622
2019-01-03 22:00:00	2.768
2019-01-03 23:00:00	2.868
2019-01-04	2.682
2019-01-04 01:00:00	2.511
2019-01-04 02:00:00	2.118
2019-01-04 03:00:00	1.941
2019-01-04 04:00:00	1.766
2019-01-04 05:00:00	1.733
2019-01-04 06:00:00	1.848
2019-01-04 07:00:00	2.101
2019-01-04 08:00:00	2.441
2019-01-04 09:00:00	2.713
2019-01-04 10:00:00	2.935
2019-01-04 11:00:00	3.044
2019-01-04 12:00:00	3.045
2019-01-04 13:00:00	2.921
2019-01-04 14:00:00	2.565
2019-01-04 15:00:00	2.211
2019-01-04 16:00:00	1.897
2019-01-04 17:00:00	1.746
2019-01-04 18:00:00	1.652
2019-01-04 19:00:00	1.852
2019-01-04 20:00:00	2.145
2019-01-04 21:00:00	2.426
2019-01-04 22:00:00	2.745
2019-01-04 23:00:00	2.841
2019-01-05	2.847
2019-01-05 01:00:00	2.698
2019-01-05 02:00:00	2.478
2019-01-05 03:00:00	2.191
2019-01-05 04:00:00	2.003
2019-01-05 05:00:00	1.834
2019-01-05 06:00:00	1.84
2019-01-05 07:00:00	2.059
2019-01-05 08:00:00	2.296
2019-01-05 09:00:00	2.606
2019-01-05 10:00:00	2.941
2019-01-05 11:00:00	3.209
2019-01-05 12:00:00	3.327
2019-01-05 13:00:00	3.165
2019-01-05 14:00:00	2.947
2019-01-05 15:00:00	2.619
2019-01-05 16:00:00	2.174
2019-01-05 17:00:00	1.984
2019-01-05 18:00:00	1.803
2019-01-05 19:00:00	1.771
2019-01-05 20:00:00	2.01
2019-01-05 21:00:00	2.278
2019-01-05 22:00:00	2.593
2019-01-05 23:00:00	2.717
2019-01-06	2.962
2019-01-06 01:00:00	2.937
2019-01-06 02:00:00	2.722
2019-01-06 03:00:00	2.434
2019-01-06 04:00:00	2.213
2019-01-06 05:00:00	2.067
2019-01-06 06:00:00	1.901
2019-01-06 07:00:00	1.916
2019-01-06 08:00:00	2.126
2019-01-06 09:00:00	2.481
2019-01-06 10:00:00	2.836
2019-01-06 11:00:00	3.049
2019-01-06 12:00:00	3.215
2019-01-06 13:00:00	3.203
2019-01-06 14:00:00	3.038
2019-01-06 15:00:00	2.675
2019-01-06 16:00:00	2.305
2019-01-06 17:00:00	2.007
2019-01-06 18:00:00	1.673
2019-01-06 19:00:00	1.565
2019-01-06 20:00:00	1.696
2019-01-06 21:00:00	1.944
2019-01-06 22:00:00	2.303
2019-01-06 23:00:00	2.516
2019-01-07	2.575
2019-01-07 01:00:00	2.632
2019-01-07 02:00:00	2.568
2019-01-07 03:00:00	2.396
2019-01-07 04:00:00	2.099
2019-01-07 05:00:00	1.868
2019-01-07 06:00:00	1.712
2019-01-07 07:00:00	1.682
2019-01-07 08:00:00	1.769
2019-01-07 09:00:00	2.03
2019-01-07 10:00:00	2.326
2019-01-07 11:00:00	2.626
2019-01-07 12:00:00	2.873
2019-01-07 13:00:00	3.023
2019-01-07 14:00:00	2.917
2019-01-07 15:00:00	2.669
2019-01-07 16:00:00	2.374
2019-01-07 17:00:00	2.08
2019-01-07 18:00:00	1.72
2019-01-07 19:00:00	1.617
2019-01-07 20:00:00	1.593
2019-01-07 21:00:00	1.852
2019-01-07 22:00:00	2.106
2019-01-07 23:00:00	2.385
2019-01-08	2.634
2019-01-08 01:00:00	2.74
2019-01-08 02:00:00	2.761
2019-01-08 03:00:00	2.691
2019-01-08 04:00:00	2.487
2019-01-08 05:00:00	2.261
2019-01-08 06:00:00	2.012
2019-01-08 07:00:00	1.876
2019-01-08 08:00:00	1.924
2019-01-08 09:00:00	2.089
2019-01-08 10:00:00	2.299
2019-01-08 11:00:00	2.573
2019-01-08 12:00:00	2.882
2019-01-08 13:00:00	3.181
2019-01-08 14:00:00	3.225
2019-01-08 15:00:00	3.024
2019-01-08 16:00:00	2.751
2019-01-08 17:00:00	2.443
2019-01-08 18:00:00	2.125
2019-01-08 19:00:00	1.931
2019-01-08 20:00:00	1.847
2019-01-08 21:00:00	1.935
2019-01-08 22:00:00	2.154
2019-01-08 23:00:00	2.411
2019-01-09	2.618
2019-01-09 01:00:00	2.743
2019-01-09 02:00:00	2.868
2019-01-09 03:00:00	2.887
2019-01-09 04:00:00	2.73
2019-01-09 05:00:00	2.487
2019-01-09 06:00:00	2.207
2019-01-09 07:00:00	2.018
2019-01-09 08:00:00	1.831
2019-01-09 09:00:00	2
2019-01-09 10:00:00	2.094
2019-01-09 11:00:00	2.351
2019-01-09 12:00:00	2.563
2019-01-09 13:00:00	2.906
2019-01-09 14:00:00	3.068
2019-01-09 15:00:00	2.885
2019-01-09 16:00:00	2.748
2019-01-09 17:00:00	2.365
2019-01-09 18:00:00	2.096
2019-01-09 19:00:00	1.836
2019-01-09 20:00:00	1.677
2019-01-09 21:00:00	1.556
2019-01-09 22:00:00	1.638
2019-01-09 23:00:00	1.874
2019-01-10	2.124
2019-01-10 01:00:00	2.252
2019-01-10 02:00:00	2.366
2019-01-10 03:00:00	2.405
2019-01-10 04:00:00	2.367
2019-01-10 05:00:00	2.18
2019-01-10 06:00:00	1.898
2019-01-10 07:00:00	1.721
2019-01-10 08:00:00	1.6
2019-01-10 09:00:00	1.548
2019-01-10 10:00:00	1.61
2019-01-10 11:00:00	1.834
2019-01-10 12:00:00	2.158
2019-01-10 13:00:00	2.403
2019-01-10 14:00:00	2.62
2019-01-10 15:00:00	2.675
2019-01-10 16:00:00	2.647
2019-01-10 17:00:00	2.524
2019-01-10 18:00:00	2.223
2019-01-10 19:00:00	1.938
2019-01-10 20:00:00	1.681
2019-01-10 21:00:00	1.627
2019-01-10 22:00:00	1.655
2019-01-10 23:00:00	1.805
2019-01-11	2.02
2019-01-11 01:00:00	2.244
2019-01-11 02:00:00	2.405
2019-01-11 03:00:00	2.571
2019-01-11 04:00:00	2.595
2019-01-11 05:00:00	2.477
2019-01-11 06:00:00	2.294
2019-01-11 07:00:00	2.055
2019-01-11 08:00:00	1.9
2019-01-11 09:00:00	1.803
2019-01-11 10:00:00	1.771
2019-01-11 11:00:00	1.918
2019-01-11 12:00:00	2.15
2019-01-11 13:00:00	2.408
2019-01-11 14:00:00	2.648
2019-01-11 15:00:00	2.802
2019-01-11 16:00:00	2.8
2019-01-11 17:00:00	2.723
2019-01-11 18:00:00	2.495
2019-01-11 19:00:00	2.211
2019-01-11 20:00:00	1.973
2019-01-11 21:00:00	1.839
2019-01-11 22:00:00	1.733
2019-01-11 23:00:00	1.815
2019-01-12	1.929
2019-01-12 01:00:00	2.138
2019-01-12 02:00:00	2.39
2019-01-12 03:00:00	2.52
2019-01-12 04:00:00	2.602
2019-01-12 05:00:00	2.549
2019-01-12 06:00:00	2.427
2019-01-12 07:00:00	2.2
2019-01-12 08:00:00	2.018
2019-01-12 09:00:00	1.867
2019-01-12 10:00:00	1.752
2019-01-12 11:00:00	1.759
2019-01-12 12:00:00	1.907
2019-01-12 13:00:00	2.18
2019-01-12 14:00:00	2.426
2019-01-12 15:00:00	2.578
2019-01-12 16:00:00	2.69
2019-01-12 17:00:00	2.62
2019-01-12 18:00:00	2.461
2019-01-12 19:00:00	2.254
2019-01-12 20:00:00	2.01
2019-01-12 21:00:00	1.838
2019-01-12 22:00:00	1.687
2019-01-12 23:00:00	1.698
2019-01-13	1.775
2019-01-13 01:00:00	1.933
2019-01-13 02:00:00	2.154
2019-01-13 03:00:00	2.363
2019-01-13 04:00:00	2.534
2019-01-13 05:00:00	2.552
2019-01-13 06:00:00	2.536
2019-01-13 07:00:00	2.354
2019-01-13 08:00:00	2.149
2019-01-13 09:00:00	1.98
2019-01-13 10:00:00	1.818
2019-01-13 11:00:00	1.739
2019-01-13 12:00:00	1.841
2019-01-13 13:00:00	2.029
2019-01-13 14:00:00	2.297
2019-01-13 15:00:00	2.531
2019-01-13 16:00:00	2.653
2019-01-13 17:00:00	2.747
2019-01-13 18:00:00	2.699
2019-01-13 19:00:00	2.556
2019-01-13 20:00:00	2.378
2019-01-13 21:00:00	2.274
2019-01-13 22:00:00	2.068
2019-01-13 23:00:00	1.994
2019-01-14	2.022
2019-01-14 01:00:00	2.184
2019-01-14 02:00:00	2.385
2019-01-14 03:00:00	2.603
2019-01-14 04:00:00	2.829
2019-01-14 05:00:00	2.938
2019-01-14 06:00:00	2.992
2019-01-14 07:00:00	2.927
2019-01-14 08:00:00	2.789
2019-01-14 09:00:00	2.584
2019-01-14 10:00:00	2.392
2019-01-14 11:00:00	2.239
2019-01-14 12:00:00	2.159
2019-01-14 13:00:00	2.241
2019-01-14 14:00:00	2.387
2019-01-14 15:00:00	2.558
2019-01-14 16:00:00	2.756
2019-01-14 17:00:00	2.89
2019-01-14 18:00:00	2.95
2019-01-14 19:00:00	2.861
2019-01-14 20:00:00	2.719
2019-01-14 21:00:00	2.515
2019-01-14 22:00:00	2.326
2019-01-14 23:00:00	2.088
2019-01-15	1.979
2019-01-15 01:00:00	1.966
2019-01-15 02:00:00	2.099
2019-01-15 03:00:00	2.346
2019-01-15 04:00:00	2.586
2019-01-15 05:00:00	2.802
2019-01-15 06:00:00	2.899
2019-01-15 07:00:00	2.922
2019-01-15 08:00:00	2.827
2019-01-15 09:00:00	2.68
2019-01-15 10:00:00	2.443
2019-01-15 11:00:00	2.196
2019-01-15 12:00:00	2.032
2019-01-15 13:00:00	2.012
2019-01-15 14:00:00	2.125
2019-01-15 15:00:00	2.231
2019-01-15 16:00:00	2.436
2019-01-15 17:00:00	2.621
2019-01-15 18:00:00	2.78
2019-01-15 19:00:00	2.797
2019-01-15 20:00:00	2.712
2019-01-15 21:00:00	2.608
2019-01-15 22:00:00	2.338
2019-01-15 23:00:00	2.111
2019-01-16	1.878
2019-01-16 01:00:00	1.813
2019-01-16 02:00:00	1.837
2019-01-16 03:00:00	2.016
2019-01-16 04:00:00	2.302
2019-01-16 05:00:00	2.629
2019-01-16 06:00:00	2.848
2019-01-16 07:00:00	2.95
2019-01-16 08:00:00	2.944
2019-01-16 09:00:00	2.845
2019-01-16 10:00:00	2.614
2019-01-16 11:00:00	2.32
2019-01-16 12:00:00	2.107
2019-01-16 13:00:00	1.955
2019-01-16 14:00:00	1.883
2019-01-16 15:00:00	1.921
2019-01-16 16:00:00	2.053
2019-01-16 17:00:00	2.237
2019-01-16 18:00:00	2.395
2019-01-16 19:00:00	2.522
2019-01-16 20:00:00	2.6
2019-01-16 21:00:00	2.514
2019-01-16 22:00:00	2.363
2019-01-16 23:00:00	2.106
2019-01-17	1.853
2019-01-17 01:00:00	1.642
2019-01-17 02:00:00	1.558
2019-01-17 03:00:00	1.649
2019-01-17 04:00:00	1.858
2019-01-17 05:00:00	2.166
2019-01-17 06:00:00	2.459
2019-01-17 07:00:00	2.666
2019-01-17 08:00:00	2.776
2019-01-17 09:00:00	2.809
2019-01-17 10:00:00	2.658
2019-01-17 11:00:00	2.44
2019-01-17 12:00:00	2.193
2019-01-17 13:00:00	1.959
2019-01-17 14:00:00	1.816
2019-01-17 15:00:00	1.676
2019-01-17 16:00:00	1.747
2019-01-17 17:00:00	1.986
2019-01-17 18:00:00	2.206
2019-01-17 19:00:00	2.439
2019-01-17 20:00:00	2.644
2019-01-17 21:00:00	2.744
2019-01-17 22:00:00	2.639
2019-01-17 23:00:00	2.457
2019-01-18	2.175
2019-01-18 01:00:00	1.886
2019-01-18 02:00:00	1.718
2019-01-18 03:00:00	1.689
2019-01-18 04:00:00	1.874
2019-01-18 05:00:00	2.131
2019-01-18 06:00:00	2.481
2019-01-18 07:00:00	2.769
2019-01-18 08:00:00	3.025
2019-01-18 09:00:00	3.163
2019-01-18 10:00:00	3.123
2019-01-18 11:00:00	2.977
2019-01-18 12:00:00	2.737
2019-01-18 13:00:00	2.386
2019-01-18 14:00:00	2.136
2019-01-18 15:00:00	1.856
2019-01-18 16:00:00	1.73
2019-01-18 17:00:00	1.859
2019-01-18 18:00:00	2.032
2019-01-18 19:00:00	2.301
2019-01-18 20:00:00	2.585
2019-01-18 21:00:00	2.746
2019-01-18 22:00:00	2.857
2019-01-18 23:00:00	2.701
2019-01-19	2.425
2019-01-19 01:00:00	2.128
2019-01-19 02:00:00	1.858
2019-01-19 03:00:00	1.622
2019-01-19 04:00:00	1.553
2019-01-19 05:00:00	1.722
2019-01-19 06:00:00	2.022
2019-01-19 07:00:00	2.409
2019-01-19 08:00:00	2.754
2019-01-19 09:00:00	3.049
2019-01-19 10:00:00	3.194
2019-01-19 11:00:00	3.17
2019-01-19 12:00:00	2.98
2019-01-19 13:00:00	2.688
2019-01-19 14:00:00	2.312
2019-01-19 15:00:00	1.939
2019-01-19 16:00:00	1.692
2019-01-19 17:00:00	1.623
2019-01-19 18:00:00	1.717
2019-01-19 19:00:00	1.965
2019-01-19 20:00:00	2.358
2019-01-19 21:00:00	2.742
2019-01-19 22:00:00	2.907
2019-01-19 23:00:00	2.999
2019-01-20	2.849
2019-01-20 01:00:00	2.679
2019-01-20 02:00:00	2.385
2019-01-20 03:00:00	2.118
2019-01-20 04:00:00	1.923
2019-01-20 05:00:00	1.892
2019-01-20 06:00:00	2.09
2019-01-20 07:00:00	2.323
2019-01-20 08:00:00	2.705
2019-01-20 09:00:00	3.195
2019-01-20 10:00:00	3.415
2019-01-20 11:00:00	3.572
2019-01-20 12:00:00	3.565
2019-01-20 13:00:00	3.387
2019-01-20 14:00:00	3.022
2019-01-20 15:00:00	2.546
2019-01-20 16:00:00	2.015
2019-01-20 17:00:00	1.861
2019-01-20 18:00:00	1.575
2019-01-20 19:00:00	1.692
2019-01-20 20:00:00	1.921
2019-01-20 21:00:00	2.361
2019-01-20 22:00:00	2.569
2019-01-20 23:00:00	2.805
2019-01-21	2.75
2019-01-21 01:00:00	2.692
2019-01-21 02:00:00	2.432
2019-01-21 03:00:00	2.049
2019-01-21 04:00:00	1.692
2019-01-21 05:00:00	1.302
2019-01-21 06:00:00	1.226
2019-01-21 07:00:00	1.439
2019-01-21 08:00:00	1.838
2019-01-21 09:00:00	2.229
2019-01-21 10:00:00	2.547
2019-01-21 11:00:00	2.835
2019-01-21 12:00:00	2.939
2019-01-21 13:00:00	2.892
2019-01-21 14:00:00	2.578
2019-01-21 15:00:00	2.085
2019-01-21 16:00:00	1.644
2019-01-21 17:00:00	1.223
2019-01-21 18:00:00	0.898
2019-01-21 19:00:00	0.871
2019-01-21 20:00:00	1.041
2019-01-21 21:00:00	1.404
2019-01-21 22:00:00	1.837
2019-01-21 23:00:00	2.129
2019-01-22	2.296
2019-01-22 01:00:00	2.27
2019-01-22 02:00:00	2.085
2019-01-22 03:00:00	1.861
2019-01-22 04:00:00	1.434
2019-01-22 05:00:00	1.055
2019-01-22 06:00:00	0.807
2019-01-22 07:00:00	0.794
2019-01-22 08:00:00	1.033
2019-01-22 09:00:00	1.437
2019-01-22 10:00:00	1.817
2019-01-22 11:00:00	2.211
2019-01-22 12:00:00	2.669
2019-01-22 13:00:00	2.883
2019-01-22 14:00:00	2.768
2019-01-22 15:00:00	2.415
2019-01-22 16:00:00	1.941
2019-01-22 17:00:00	1.564
2019-01-22 18:00:00	1.229
2019-01-22 19:00:00	0.977
2019-01-22 20:00:00	0.975
2019-01-22 21:00:00	1.263
2019-01-22 22:00:00	1.768
2019-01-22 23:00:00	2.185
2019-01-23	2.51
2019-01-23 01:00:00	2.677
2019-01-23 02:00:00	2.706
2019-01-23 03:00:00	2.543
2019-01-23 04:00:00	2.232
2019-01-23 05:00:00	1.85
2019-01-23 06:00:00	1.483
2019-01-23 07:00:00	1.254
2019-01-23 08:00:00	1.243
2019-01-23 09:00:00	1.53
2019-01-23 10:00:00	1.935
2019-01-23 11:00:00	2.404
2019-01-23 12:00:00	2.83
2019-01-23 13:00:00	3.03
2019-01-23 14:00:00	3.195
2019-01-23 15:00:00	2.951
2019-01-23 16:00:00	2.636
2019-01-23 17:00:00	2.173
2019-01-23 18:00:00	1.745
2019-01-23 19:00:00	1.393
2019-01-23 20:00:00	1.231
2019-01-23 21:00:00	1.293
2019-01-23 22:00:00	1.626
2019-01-23 23:00:00	2.069
2019-01-24	2.438
2019-01-24 01:00:00	2.685
2019-01-24 02:00:00	2.854
2019-01-24 03:00:00	2.889
2019-01-24 04:00:00	2.689
2019-01-24 05:00:00	2.334
2019-01-24 06:00:00	1.96
2019-01-24 07:00:00	1.67
2019-01-24 08:00:00	1.482
2019-01-24 09:00:00	1.488
2019-01-24 10:00:00	1.748
2019-01-24 11:00:00	2.128
2019-01-24 12:00:00	2.552
2019-01-24 13:00:00	2.909
2019-01-24 14:00:00	3.128
2019-01-24 15:00:00	3.191
2019-01-24 16:00:00	3.045
2019-01-24 17:00:00	2.652
2019-01-24 18:00:00	2.246
2019-01-24 19:00:00	1.94
2019-01-24 20:00:00	1.495
2019-01-24 21:00:00	1.303
2019-01-24 22:00:00	1.268
2019-01-24 23:00:00	1.333
2019-01-25	1.814
2019-01-25 01:00:00	2.259
2019-01-25 02:00:00	2.451
2019-01-25 03:00:00	2.418
2019-01-25 04:00:00	2.497
2019-01-25 05:00:00	2.291
2019-01-25 06:00:00	1.984
2019-01-25 07:00:00	1.69
2019-01-25 08:00:00	1.406
2019-01-25 09:00:00	1.33
2019-01-25 10:00:00	1.287
2019-01-25 11:00:00	1.465
2019-01-25 12:00:00	1.876
2019-01-25 13:00:00	2.189
2019-01-25 14:00:00	2.456
2019-01-25 15:00:00	2.638
2019-01-25 16:00:00	2.757
2019-01-25 17:00:00	2.538
2019-01-25 18:00:00	2.218
2019-01-25 19:00:00	1.818
2019-01-25 20:00:00	1.446
2019-01-25 21:00:00	1.185
2019-01-25 22:00:00	1.138
2019-01-25 23:00:00	1.301
2019-01-26	1.459
2019-01-26 01:00:00	1.88
2019-01-26 02:00:00	2.21
2019-01-26 03:00:00	2.484
2019-01-26 04:00:00	2.628
2019-01-26 05:00:00	2.681
2019-01-26 06:00:00	2.543
2019-01-26 07:00:00	2.201
2019-01-26 08:00:00	1.844
2019-01-26 09:00:00	1.539
2019-01-26 10:00:00	1.38
2019-01-26 11:00:00	1.426
2019-01-26 12:00:00	1.603
2019-01-26 13:00:00	2.005
2019-01-26 14:00:00	2.388
2019-01-26 15:00:00	2.646
2019-01-26 16:00:00	2.77
2019-01-26 17:00:00	2.759
2019-01-26 18:00:00	2.612
2019-01-26 19:00:00	2.354
2019-01-26 20:00:00	2.024
2019-01-26 21:00:00	1.737
2019-01-26 22:00:00	1.592
2019-01-26 23:00:00	1.51
2019-01-27	1.63
2019-01-27 01:00:00	1.853
2019-01-27 02:00:00	2.213
2019-01-27 03:00:00	2.54
2019-01-27 04:00:00	2.776
2019-01-27 05:00:00	2.949
2019-01-27 06:00:00	2.958
2019-01-27 07:00:00	2.789
2019-01-27 08:00:00	2.474
2019-01-27 09:00:00	2.184
2019-01-27 10:00:00	1.931
2019-01-27 11:00:00	1.784
2019-01-27 12:00:00	1.807
2019-01-27 13:00:00	1.964
2019-01-27 14:00:00	2.275
2019-01-27 15:00:00	2.474
2019-01-27 16:00:00	2.67
2019-01-27 17:00:00	2.804
2019-01-27 18:00:00	2.815
2019-01-27 19:00:00	2.616
2019-01-27 20:00:00	2.41
2019-01-27 21:00:00	2.173
2019-01-27 22:00:00	1.872
2019-01-27 23:00:00	1.713
2019-01-28	1.629
2019-01-28 01:00:00	1.646
2019-01-28 02:00:00	1.954
2019-01-28 03:00:00	2.225
2019-01-28 04:00:00	2.58
2019-01-28 05:00:00	2.786
2019-01-28 06:00:00	2.867
2019-01-28 07:00:00	2.851
2019-01-28 08:00:00	2.669
2019-01-28 09:00:00	2.408
2019-01-28 10:00:00	2.12
2019-01-28 11:00:00	1.892
2019-01-28 12:00:00	1.856
2019-01-28 13:00:00	1.892
2019-01-28 14:00:00	2.006
2019-01-28 15:00:00	2.219
2019-01-28 16:00:00	2.452
2019-01-28 17:00:00	2.581
2019-01-28 18:00:00	2.716
2019-01-28 19:00:00	2.726
2019-01-28 20:00:00	2.727
2019-01-28 21:00:00	2.441
2019-01-28 22:00:00	2.261
2019-01-28 23:00:00	1.984
2019-01-29	1.854
2019-01-29 01:00:00	1.713
2019-01-29 02:00:00	1.912
2019-01-29 03:00:00	2.103
2019-01-29 04:00:00	2.459
2019-01-29 05:00:00	2.652
2019-01-29 06:00:00	2.935
2019-01-29 07:00:00	3.003
2019-01-29 08:00:00	2.959
2019-01-29 09:00:00	2.829
2019-01-29 10:00:00	2.594
2019-01-29 11:00:00	2.351
2019-01-29 12:00:00	2.106
2019-01-29 13:00:00	1.988
2019-01-29 14:00:00	2.001
2019-01-29 15:00:00	2.069
2019-01-29 16:00:00	2.349
2019-01-29 17:00:00	2.532
2019-01-29 18:00:00	2.725
2019-01-29 19:00:00	2.834
2019-01-29 20:00:00	2.864
2019-01-29 21:00:00	2.755
2019-01-29 22:00:00	2.589
2019-01-29 23:00:00	2.386
2019-01-30	2.118
2019-01-30 01:00:00	1.931
2019-01-30 02:00:00	1.795
2019-01-30 03:00:00	1.889
2019-01-30 04:00:00	2.135
2019-01-30 05:00:00	2.353
2019-01-30 06:00:00	2.712
2019-01-30 07:00:00	2.869
2019-01-30 08:00:00	2.808
2019-01-30 09:00:00	2.855
2019-01-30 10:00:00	2.656
2019-01-30 11:00:00	2.432
2019-01-30 12:00:00	2.186
2019-01-30 13:00:00	2.104
2019-01-30 14:00:00	1.938
2019-01-30 15:00:00	1.897
2019-01-30 16:00:00	1.936
2019-01-30 17:00:00	2.14
2019-01-30 18:00:00	2.34
2019-01-30 19:00:00	2.477
2019-01-30 20:00:00	2.529
2019-01-30 21:00:00	2.431
2019-01-30 22:00:00	2.124
2019-01-30 23:00:00	1.892
2019-01-31	1.567
2019-01-31 01:00:00	1.145
2019-01-31 02:00:00	1.072
2019-01-31 03:00:00	1.167
2019-01-31 04:00:00	1.364
2019-01-31 05:00:00	1.745
2019-01-31 06:00:00	1.98
2019-01-31 07:00:00	2.209
2019-01-31 08:00:00	2.343
2019-01-31 09:00:00	2.534
2019-01-31 10:00:00	2.406
2019-01-31 11:00:00	2.301
2019-01-31 12:00:00	2.136
2019-01-31 13:00:00	1.8
2019-01-31 14:00:00	1.561
2019-01-31 15:00:00	1.352
2019-01-31 16:00:00	1.28
2019-01-31 17:00:00	1.417
2019-01-31 18:00:00	1.667
2019-01-31 19:00:00	1.904
2019-01-31 20:00:00	2.074
2019-01-31 21:00:00	2.202
2019-01-31 22:00:00	2.205
2019-01-31 23:00:00	2.102
2019-02-01	1.89
2019-02-01 01:00:00	1.65
2019-02-01 02:00:00	1.449
2019-02-01 03:00:00	1.347
2019-02-01 04:00:00	1.374
2019-02-01 05:00:00	1.463
2019-02-01 06:00:00	1.731
2019-02-01 07:00:00	2.026
2019-02-01 08:00:00	2.293
2019-02-01 09:00:00	2.508
2019-02-01 10:00:00	2.558
2019-02-01 11:00:00	2.494
2019-02-01 12:00:00	2.349
2019-02-01 13:00:00	2.096
2019-02-01 14:00:00	1.801
2019-02-01 15:00:00	1.55
2019-02-01 16:00:00	1.408
2019-02-01 17:00:00	1.411
2019-02-01 18:00:00	1.587
2019-02-01 19:00:00	1.808
2019-02-01 20:00:00	2.05
2019-02-01 21:00:00	2.25
2019-02-01 22:00:00	2.387
2019-02-01 23:00:00	2.446
2019-02-02	2.278
2019-02-02 01:00:00	2.035
2019-02-02 02:00:00	1.778
2019-02-02 03:00:00	1.596
2019-02-02 04:00:00	1.502
2019-02-02 05:00:00	1.501
2019-02-02 06:00:00	1.703
2019-02-02 07:00:00	1.97
2019-02-02 08:00:00	2.299
2019-02-02 09:00:00	2.557
2019-02-02 10:00:00	2.719
2019-02-02 11:00:00	2.77
2019-02-02 12:00:00	2.72
2019-02-02 13:00:00	2.482
2019-02-02 14:00:00	2.224
2019-02-02 15:00:00	1.905
2019-02-02 16:00:00	1.655
2019-02-02 17:00:00	1.531
2019-02-02 18:00:00	1.545
2019-02-02 19:00:00	1.685
2019-02-02 20:00:00	1.934
2019-02-02 21:00:00	2.164
2019-02-02 22:00:00	2.382
2019-02-02 23:00:00	2.434
2019-02-03	2.342
2019-02-03 01:00:00	2.149
2019-02-03 02:00:00	1.875
2019-02-03 03:00:00	1.593
2019-02-03 04:00:00	1.456
2019-02-03 05:00:00	1.347
2019-02-03 06:00:00	1.373
2019-02-03 07:00:00	1.607
2019-02-03 08:00:00	1.876
2019-02-03 09:00:00	2.216
2019-02-03 10:00:00	2.455
2019-02-03 11:00:00	2.593
2019-02-03 12:00:00	2.645
2019-02-03 13:00:00	2.524
2019-02-03 14:00:00	2.303
2019-02-03 15:00:00	1.987
2019-02-03 16:00:00	1.683
2019-02-03 17:00:00	1.494
2019-02-03 18:00:00	1.438
2019-02-03 19:00:00	1.556
2019-02-03 20:00:00	1.777
2019-02-03 21:00:00	2.103
2019-02-03 22:00:00	2.372
2019-02-03 23:00:00	2.534
2019-02-04	2.553
2019-02-04 01:00:00	2.44
2019-02-04 02:00:00	2.292
2019-02-04 03:00:00	2.056
2019-02-04 04:00:00	1.843
2019-02-04 05:00:00	1.687
2019-02-04 06:00:00	1.643
2019-02-04 07:00:00	1.79
2019-02-04 08:00:00	2.045
2019-02-04 09:00:00	2.436
2019-02-04 10:00:00	2.661
2019-02-04 11:00:00	2.879
2019-02-04 12:00:00	3.042
2019-02-04 13:00:00	2.958
2019-02-04 14:00:00	2.778
2019-02-04 15:00:00	2.486
2019-02-04 16:00:00	2.109
2019-02-04 17:00:00	1.914
2019-02-04 18:00:00	1.673
2019-02-04 19:00:00	1.67
2019-02-04 20:00:00	1.808
2019-02-04 21:00:00	2.118
2019-02-04 22:00:00	2.442
2019-02-04 23:00:00	2.643
2019-02-05	2.758
2019-02-05 01:00:00	2.706
2019-02-05 02:00:00	2.56
2019-02-05 03:00:00	2.296
2019-02-05 04:00:00	2.073
2019-02-05 05:00:00	1.825
2019-02-05 06:00:00	1.719
2019-02-05 07:00:00	1.686
2019-02-05 08:00:00	1.859
2019-02-05 09:00:00	2.156
2019-02-05 10:00:00	2.438
2019-02-05 11:00:00	2.636
2019-02-05 12:00:00	2.88
2019-02-05 13:00:00	2.94
2019-02-05 14:00:00	2.775
2019-02-05 15:00:00	2.459
2019-02-05 16:00:00	2.075
2019-02-05 17:00:00	1.755
2019-02-05 18:00:00	1.633
2019-02-05 19:00:00	1.514
2019-02-05 20:00:00	1.622
2019-02-05 21:00:00	1.825
2019-02-05 22:00:00	2.149
2019-02-05 23:00:00	2.41
2019-02-06	2.561
2019-02-06 01:00:00	2.659
2019-02-06 02:00:00	2.567
2019-02-06 03:00:00	2.402
2019-02-06 04:00:00	2.166
2019-02-06 05:00:00	1.883
2019-02-06 06:00:00	1.721
2019-02-06 07:00:00	1.69
2019-02-06 08:00:00	1.744
2019-02-06 09:00:00	1.999
2019-02-06 10:00:00	2.338
2019-02-06 11:00:00	2.661
2019-02-06 12:00:00	2.92
2019-02-06 13:00:00	3.012
2019-02-06 14:00:00	3.024
2019-02-06 15:00:00	2.743
2019-02-06 16:00:00	2.428
2019-02-06 17:00:00	2.169
2019-02-06 18:00:00	1.822
2019-02-06 19:00:00	1.652
2019-02-06 20:00:00	1.68
2019-02-06 21:00:00	1.753
2019-02-06 22:00:00	2.046
2019-02-06 23:00:00	2.394
2019-02-07	2.589
2019-02-07 01:00:00	2.763
2019-02-07 02:00:00	2.786
2019-02-07 03:00:00	2.665
2019-02-07 04:00:00	2.488
2019-02-07 05:00:00	2.222
2019-02-07 06:00:00	1.944
2019-02-07 07:00:00	1.793
2019-02-07 08:00:00	1.775
2019-02-07 09:00:00	1.941
2019-02-07 10:00:00	2.214
2019-02-07 11:00:00	2.519
2019-02-07 12:00:00	2.788
2019-02-07 13:00:00	3.018
2019-02-07 14:00:00	3.094
2019-02-07 15:00:00	3.016
2019-02-07 16:00:00	2.722
2019-02-07 17:00:00	2.459
2019-02-07 18:00:00	2.125
2019-02-07 19:00:00	1.92
2019-02-07 20:00:00	1.852
2019-02-07 21:00:00	1.878
2019-02-07 22:00:00	2.108
2019-02-07 23:00:00	2.371
2019-02-08	2.565
2019-02-08 01:00:00	2.762
2019-02-08 02:00:00	2.894
2019-02-08 03:00:00	2.813
2019-02-08 04:00:00	2.758
2019-02-08 05:00:00	2.416
2019-02-08 06:00:00	2.217
2019-02-08 07:00:00	1.972
2019-02-08 08:00:00	1.856
2019-02-08 09:00:00	1.893
2019-02-08 10:00:00	2.04
2019-02-08 11:00:00	2.261
2019-02-08 12:00:00	2.612
2019-02-08 13:00:00	2.872
2019-02-08 14:00:00	3.007
2019-02-08 15:00:00	2.988
2019-02-08 16:00:00	2.8
2019-02-08 17:00:00	2.46
2019-02-08 18:00:00	2.234
2019-02-08 19:00:00	1.876
2019-02-08 20:00:00	1.672
2019-02-08 21:00:00	1.654
2019-02-08 22:00:00	1.764
2019-02-08 23:00:00	1.92
2019-02-09	2.181
2019-02-09 01:00:00	2.396
2019-02-09 02:00:00	2.504
2019-02-09 03:00:00	2.468
2019-02-09 04:00:00	2.252
2019-02-09 05:00:00	2.071
2019-02-09 06:00:00	1.818
2019-02-09 07:00:00	1.571
2019-02-09 08:00:00	1.417
2019-02-09 09:00:00	1.328
2019-02-09 10:00:00	1.4
2019-02-09 11:00:00	1.597
2019-02-09 12:00:00	1.819
2019-02-09 13:00:00	2.048
2019-02-09 14:00:00	2.303
2019-02-09 15:00:00	2.393
2019-02-09 16:00:00	2.271
2019-02-09 17:00:00	2.145
2019-02-09 18:00:00	1.813
2019-02-09 19:00:00	1.509
2019-02-09 20:00:00	1.281
2019-02-09 21:00:00	1.22
2019-02-09 22:00:00	1.244
2019-02-09 23:00:00	1.421
2019-02-10	1.614
2019-02-10 01:00:00	1.873
2019-02-10 02:00:00	2.103
2019-02-10 03:00:00	2.206
2019-02-10 04:00:00	2.237
2019-02-10 05:00:00	2.131
2019-02-10 06:00:00	1.906
2019-02-10 07:00:00	1.724
2019-02-10 08:00:00	1.521
2019-02-10 09:00:00	1.408
2019-02-10 10:00:00	1.38
2019-02-10 11:00:00	1.5
2019-02-10 12:00:00	1.795
2019-02-10 13:00:00	2.09
2019-02-10 14:00:00	2.347
2019-02-10 15:00:00	2.479
2019-02-10 16:00:00	2.487
2019-02-10 17:00:00	2.383
2019-02-10 18:00:00	2.19
2019-02-10 19:00:00	1.9
2019-02-10 20:00:00	1.646
2019-02-10 21:00:00	1.514
2019-02-10 22:00:00	1.382
2019-02-10 23:00:00	1.541
2019-02-11	1.743
2019-02-11 01:00:00	2.001
2019-02-11 02:00:00	2.213
2019-02-11 03:00:00	2.36
2019-02-11 04:00:00	2.521
2019-02-11 05:00:00	2.456
2019-02-11 06:00:00	2.282
2019-02-11 07:00:00	2.056
2019-02-11 08:00:00	1.796
2019-02-11 09:00:00	1.712
2019-02-11 10:00:00	1.495
2019-02-11 11:00:00	1.549
2019-02-11 12:00:00	1.681
2019-02-11 13:00:00	1.942
2019-02-11 14:00:00	2.257
2019-02-11 15:00:00	2.419
2019-02-11 16:00:00	2.515
2019-02-11 17:00:00	2.496
2019-02-11 18:00:00	2.418
2019-02-11 19:00:00	2.111
2019-02-11 20:00:00	1.924
2019-02-11 21:00:00	1.744
2019-02-11 22:00:00	1.612
2019-02-11 23:00:00	1.679
2019-02-12	1.797
2019-02-12 01:00:00	1.983
2019-02-12 02:00:00	2.296
2019-02-12 03:00:00	2.514
2019-02-12 04:00:00	2.671
2019-02-12 05:00:00	2.756
2019-02-12 06:00:00	2.708
2019-02-12 07:00:00	2.499
2019-02-12 08:00:00	2.312
2019-02-12 09:00:00	2.082
2019-02-12 10:00:00	1.966
2019-02-12 11:00:00	1.885
2019-02-12 12:00:00	1.962
2019-02-12 13:00:00	2.137
2019-02-12 14:00:00	2.4
2019-02-12 15:00:00	2.572
2019-02-12 16:00:00	2.729
2019-02-12 17:00:00	2.82
2019-02-12 18:00:00	2.801
2019-02-12 19:00:00	2.701
2019-02-12 20:00:00	2.499
2019-02-12 21:00:00	2.31
2019-02-12 22:00:00	2.14
2019-02-12 23:00:00	2.04
2019-02-13	1.999
2019-02-13 01:00:00	2.144
2019-02-13 02:00:00	2.31
2019-02-13 03:00:00	2.563
2019-02-13 04:00:00	2.786
2019-02-13 05:00:00	2.944
2019-02-13 06:00:00	2.956
2019-02-13 07:00:00	2.879
2019-02-13 08:00:00	2.696
2019-02-13 09:00:00	2.607
2019-02-13 10:00:00	2.355
2019-02-13 11:00:00	2.01
2019-02-13 12:00:00	1.975
2019-02-13 13:00:00	2
2019-02-13 14:00:00	2.206
2019-02-13 15:00:00	2.399
2019-02-13 16:00:00	2.373
2019-02-13 17:00:00	2.548
2019-02-13 18:00:00	2.707
2019-02-13 19:00:00	2.645
2019-02-13 20:00:00	2.41
2019-02-13 21:00:00	2.188
2019-02-13 22:00:00	1.965
2019-02-13 23:00:00	1.841
2019-02-14	1.573
2019-02-14 01:00:00	1.606
2019-02-14 02:00:00	1.663
2019-02-14 03:00:00	1.798
2019-02-14 04:00:00	2.093
2019-02-14 05:00:00	2.341
2019-02-14 06:00:00	2.477
2019-02-14 07:00:00	2.532
2019-02-14 08:00:00	2.511
2019-02-14 09:00:00	2.275
2019-02-14 10:00:00	1.991
2019-02-14 11:00:00	1.697
2019-02-14 12:00:00	1.553
2019-02-14 13:00:00	1.523
2019-02-14 14:00:00	1.551
2019-02-14 15:00:00	1.653
2019-02-14 16:00:00	1.846
2019-02-14 17:00:00	2.085
2019-02-14 18:00:00	2.286
2019-02-14 19:00:00	2.371
2019-02-14 20:00:00	2.377
2019-02-14 21:00:00	2.239
2019-02-14 22:00:00	2.024
2019-02-14 23:00:00	1.831
2019-02-15	1.672
2019-02-15 01:00:00	1.561
2019-02-15 02:00:00	1.509
2019-02-15 03:00:00	1.687
2019-02-15 04:00:00	2
2019-02-15 05:00:00	2.307
2019-02-15 06:00:00	2.543
2019-02-15 07:00:00	2.839
2019-02-15 08:00:00	2.846
2019-02-15 09:00:00	2.806
2019-02-15 10:00:00	2.664
2019-02-15 11:00:00	2.401
2019-02-15 12:00:00	2.147
2019-02-15 13:00:00	1.914
2019-02-15 14:00:00	1.809
2019-02-15 15:00:00	1.785
2019-02-15 16:00:00	1.949
2019-02-15 17:00:00	2.194
2019-02-15 18:00:00	2.399
2019-02-15 19:00:00	2.6
2019-02-15 20:00:00	2.682
2019-02-15 21:00:00	2.726
2019-02-15 22:00:00	2.635
2019-02-15 23:00:00	2.38
2019-02-16	2.101
2019-02-16 01:00:00	1.916
2019-02-16 02:00:00	1.786
2019-02-16 03:00:00	1.804
2019-02-16 04:00:00	1.965
2019-02-16 05:00:00	2.298
2019-02-16 06:00:00	2.632
2019-02-16 07:00:00	2.898
2019-02-16 08:00:00	3.086
2019-02-16 09:00:00	3.152
2019-02-16 10:00:00	3.021
2019-02-16 11:00:00	2.827
2019-02-16 12:00:00	2.527
2019-02-16 13:00:00	2.218
2019-02-16 14:00:00	2.005
2019-02-16 15:00:00	1.797
2019-02-16 16:00:00	1.703
2019-02-16 17:00:00	1.901
2019-02-16 18:00:00	2.177
2019-02-16 19:00:00	2.435
2019-02-16 20:00:00	2.674
2019-02-16 21:00:00	2.841
2019-02-16 22:00:00	2.855
2019-02-16 23:00:00	2.69
2019-02-17	2.355
2019-02-17 01:00:00	2.107
2019-02-17 02:00:00	1.829
2019-02-17 03:00:00	1.703
2019-02-17 04:00:00	1.682
2019-02-17 05:00:00	1.85
2019-02-17 06:00:00	2.171
2019-02-17 07:00:00	2.585
2019-02-17 08:00:00	2.921
2019-02-17 09:00:00	3.194
2019-02-17 10:00:00	3.22
2019-02-17 11:00:00	3.199
2019-02-17 12:00:00	2.963
2019-02-17 13:00:00	2.611
2019-02-17 14:00:00	2.213
2019-02-17 15:00:00	1.852
2019-02-17 16:00:00	1.625
2019-02-17 17:00:00	1.627
2019-02-17 18:00:00	1.819
2019-02-17 19:00:00	2.065
2019-02-17 20:00:00	2.408
2019-02-17 21:00:00	2.638
2019-02-17 22:00:00	2.871
2019-02-17 23:00:00	2.775
2019-02-18	2.67
2019-02-18 01:00:00	2.394
2019-02-18 02:00:00	1.987
2019-02-18 03:00:00	1.813
2019-02-18 04:00:00	1.589
2019-02-18 05:00:00	1.566
2019-02-18 06:00:00	1.78
2019-02-18 07:00:00	2.154
2019-02-18 08:00:00	2.693
2019-02-18 09:00:00	3.107
2019-02-18 10:00:00	3.353
2019-02-18 11:00:00	3.383
2019-02-18 12:00:00	3.23
2019-02-18 13:00:00	3.066
2019-02-18 14:00:00	2.579
2019-02-18 15:00:00	2.027
2019-02-18 16:00:00	1.7
2019-02-18 17:00:00	1.61
2019-02-18 18:00:00	1.539
2019-02-18 19:00:00	1.749
2019-02-18 20:00:00	2.149
2019-02-18 21:00:00	2.487
2019-02-18 22:00:00	2.681
2019-02-18 23:00:00	2.767
2019-02-19	2.823
2019-02-19 01:00:00	2.623
2019-02-19 02:00:00	2.196
2019-02-19 03:00:00	1.864
2019-02-19 04:00:00	1.515
2019-02-19 05:00:00	1.345
2019-02-19 06:00:00	1.359
2019-02-19 07:00:00	1.61
2019-02-19 08:00:00	2.047
2019-02-19 09:00:00	2.494
2019-02-19 10:00:00	2.823
2019-02-19 11:00:00	3.046
2019-02-19 12:00:00	3.154
2019-02-19 13:00:00	3.04
2019-02-19 14:00:00	2.673
2019-02-19 15:00:00	2.221
2019-02-19 16:00:00	1.745
2019-02-19 17:00:00	1.416
2019-02-19 18:00:00	1.179
2019-02-19 19:00:00	1.221
2019-02-19 20:00:00	1.562
2019-02-19 21:00:00	2.029
2019-02-19 22:00:00	2.412
2019-02-19 23:00:00	2.712
2019-02-20	2.83
2019-02-20 01:00:00	2.806
2019-02-20 02:00:00	2.56
2019-02-20 03:00:00	2.132
2019-02-20 04:00:00	1.721
2019-02-20 05:00:00	1.405
2019-02-20 06:00:00	1.197
2019-02-20 07:00:00	1.211
2019-02-20 08:00:00	1.518
2019-02-20 09:00:00	1.944
2019-02-20 10:00:00	2.475
2019-02-20 11:00:00	2.788
2019-02-20 12:00:00	3.069
2019-02-20 13:00:00	3.135
2019-02-20 14:00:00	2.932
2019-02-20 15:00:00	2.587
2019-02-20 16:00:00	2.061
2019-02-20 17:00:00	1.621
2019-02-20 18:00:00	1.331
2019-02-20 19:00:00	1.228
2019-02-20 20:00:00	1.327
2019-02-20 21:00:00	1.773
2019-02-20 22:00:00	2.305
2019-02-20 23:00:00	2.719
2019-02-21	2.916
2019-02-21 01:00:00	3.102
2019-02-21 02:00:00	3.057
2019-02-21 03:00:00	2.782
2019-02-21 04:00:00	2.471
2019-02-21 05:00:00	1.925
2019-02-21 06:00:00	1.691
2019-02-21 07:00:00	1.441
2019-02-21 08:00:00	1.483
2019-02-21 09:00:00	1.801
2019-02-21 10:00:00	2.114
2019-02-21 11:00:00	2.673
2019-02-21 12:00:00	3.029
2019-02-21 13:00:00	3.196
2019-02-21 14:00:00	3.223
2019-02-21 15:00:00	2.995
2019-02-21 16:00:00	2.574
2019-02-21 17:00:00	2.091
2019-02-21 18:00:00	1.767
2019-02-21 19:00:00	1.466
2019-02-21 20:00:00	1.324
2019-02-21 21:00:00	1.521
2019-02-21 22:00:00	1.819
2019-02-21 23:00:00	2.333
2019-02-22	2.637
2019-02-22 01:00:00	2.833
2019-02-22 02:00:00	2.944
2019-02-22 03:00:00	2.894
2019-02-22 04:00:00	2.689
2019-02-22 05:00:00	2.193
2019-02-22 06:00:00	1.752
2019-02-22 07:00:00	1.442
2019-02-22 08:00:00	1.274
2019-02-22 09:00:00	1.337
2019-02-22 10:00:00	1.711
2019-02-22 11:00:00	2.15
2019-02-22 12:00:00	2.615
2019-02-22 13:00:00	2.956
2019-02-22 14:00:00	3.132
2019-02-22 15:00:00	3.1
2019-02-22 16:00:00	2.845
2019-02-22 17:00:00	2.544
2019-02-22 18:00:00	2.15
2019-02-22 19:00:00	1.777
2019-02-22 20:00:00	1.53
2019-02-22 21:00:00	1.542
2019-02-22 22:00:00	1.708
2019-02-22 23:00:00	2.009
2019-02-23	2.41
2019-02-23 01:00:00	2.726
2019-02-23 02:00:00	2.962
2019-02-23 03:00:00	3.026
2019-02-23 04:00:00	2.877
2019-02-23 05:00:00	2.636
2019-02-23 06:00:00	2.215
2019-02-23 07:00:00	1.835
2019-02-23 08:00:00	1.536
2019-02-23 09:00:00	1.438
2019-02-23 10:00:00	1.562
2019-02-23 11:00:00	1.867
2019-02-23 12:00:00	2.331
2019-02-23 13:00:00	2.65
2019-02-23 14:00:00	2.946
2019-02-23 15:00:00	3.072
2019-02-23 16:00:00	2.954
2019-02-23 17:00:00	2.726
2019-02-23 18:00:00	2.407
2019-02-23 19:00:00	1.999
2019-02-23 20:00:00	1.689
2019-02-23 21:00:00	1.558
2019-02-23 22:00:00	1.594
2019-02-23 23:00:00	1.805
2019-02-24	2.115
2019-02-24 01:00:00	2.528
2019-02-24 02:00:00	2.803
2019-02-24 03:00:00	2.995
2019-02-24 04:00:00	3.094
2019-02-24 05:00:00	2.961
2019-02-24 06:00:00	2.731
2019-02-24 07:00:00	2.452
2019-02-24 08:00:00	2.156
2019-02-24 09:00:00	1.951
2019-02-24 10:00:00	1.814
2019-02-24 11:00:00	1.932
2019-02-24 12:00:00	2.244
2019-02-24 13:00:00	2.5
2019-02-24 14:00:00	2.786
2019-02-24 15:00:00	3.061
2019-02-24 16:00:00	3.052
2019-02-24 17:00:00	3.102
2019-02-24 18:00:00	2.787
2019-02-24 19:00:00	2.468
2019-02-24 20:00:00	2.217
2019-02-24 21:00:00	1.97
2019-02-24 22:00:00	1.861
2019-02-24 23:00:00	1.844
2019-02-25	1.976
2019-02-25 01:00:00	2.367
2019-02-25 02:00:00	2.631
2019-02-25 03:00:00	2.838
2019-02-25 04:00:00	3.059
2019-02-25 05:00:00	2.929
2019-02-25 06:00:00	2.75
2019-02-25 07:00:00	2.503
2019-02-25 08:00:00	2.229
2019-02-25 09:00:00	1.858
2019-02-25 10:00:00	1.649
2019-02-25 11:00:00	1.305
2019-02-25 12:00:00	1.365
2019-02-25 13:00:00	1.549
2019-02-25 14:00:00	1.655
2019-02-25 15:00:00	1.83
2019-02-25 16:00:00	2.009
2019-02-25 17:00:00	2.13
2019-02-25 18:00:00	2.111
2019-02-25 19:00:00	1.847
2019-02-25 20:00:00	1.644
2019-02-25 21:00:00	1.395
2019-02-25 22:00:00	1.137
2019-02-25 23:00:00	1.062
2019-02-26	1.114
2019-02-26 01:00:00	1.233
2019-02-26 02:00:00	1.485
2019-02-26 03:00:00	1.739
2019-02-26 04:00:00	2.025
2019-02-26 05:00:00	2.116
2019-02-26 06:00:00	2.194
2019-02-26 07:00:00	2.116
2019-02-26 08:00:00	1.949
2019-02-26 09:00:00	1.643
2019-02-26 10:00:00	1.368
2019-02-26 11:00:00	1.142
2019-02-26 12:00:00	1.073
2019-02-26 13:00:00	1.168
2019-02-26 14:00:00	1.354
2019-02-26 15:00:00	1.649
2019-02-26 16:00:00	1.85
2019-02-26 17:00:00	2.088
2019-02-26 18:00:00	2.134
2019-02-26 19:00:00	2.059
2019-02-26 20:00:00	1.957
2019-02-26 21:00:00	1.754
2019-02-26 22:00:00	1.632
2019-02-26 23:00:00	1.457
2019-02-27	1.367
2019-02-27 01:00:00	1.435
2019-02-27 02:00:00	1.628
2019-02-27 03:00:00	1.892
2019-02-27 04:00:00	2.179
2019-02-27 05:00:00	2.418
2019-02-27 06:00:00	2.605
2019-02-27 07:00:00	2.663
2019-02-27 08:00:00	2.535
2019-02-27 09:00:00	2.387
2019-02-27 10:00:00	2.119
2019-02-27 11:00:00	1.901
2019-02-27 12:00:00	1.761
2019-02-27 13:00:00	1.711
2019-02-27 14:00:00	1.751
2019-02-27 15:00:00	1.887
2019-02-27 16:00:00	2.078
2019-02-27 17:00:00	2.24
2019-02-27 18:00:00	2.375
2019-02-27 19:00:00	2.401
2019-02-27 20:00:00	2.308
2019-02-27 21:00:00	2.255
2019-02-27 22:00:00	2.09
2019-02-27 23:00:00	1.906
2019-02-28	1.768
2019-02-28 01:00:00	1.686
2019-02-28 02:00:00	1.77
2019-02-28 03:00:00	1.945
2019-02-28 04:00:00	2.171
2019-02-28 05:00:00	2.449
2019-02-28 06:00:00	2.661
2019-02-28 07:00:00	2.838
2019-02-28 08:00:00	2.875
2019-02-28 09:00:00	2.782
2019-02-28 10:00:00	2.568
2019-02-28 11:00:00	2.354
2019-02-28 12:00:00	2.147
2019-02-28 13:00:00	1.973
2019-02-28 14:00:00	1.919
2019-02-28 15:00:00	1.947
2019-02-28 16:00:00	2.063
2019-02-28 17:00:00	2.227
2019-02-28 18:00:00	2.488
2019-02-28 19:00:00	2.615
2019-02-28 20:00:00	2.674
2019-02-28 21:00:00	2.688
2019-02-28 22:00:00	2.593
2019-02-28 23:00:00	2.396
2019-03-01	2.18
2019-03-01 01:00:00	2.063
2019-03-01 02:00:00	1.979
2019-03-01 03:00:00	2.023
2019-03-01 04:00:00	2.168
2019-03-01 05:00:00	2.395
2019-03-01 06:00:00	2.618
2019-03-01 07:00:00	2.793
2019-03-01 08:00:00	2.88
2019-03-01 09:00:00	2.911
2019-03-01 10:00:00	2.819
2019-03-01 11:00:00	2.628
2019-03-01 12:00:00	2.349
2019-03-01 13:00:00	2.155
2019-03-01 14:00:00	2.006
2019-03-01 15:00:00	1.888
2019-03-01 16:00:00	1.927
2019-03-01 17:00:00	2.129
2019-03-01 18:00:00	2.306
2019-03-01 19:00:00	2.511
2019-03-01 20:00:00	2.654
2019-03-01 21:00:00	2.702
2019-03-01 22:00:00	2.723
2019-03-01 23:00:00	2.629
2019-03-02	2.448
2019-03-02 01:00:00	2.287
2019-03-02 02:00:00	2.141
2019-03-02 03:00:00	2.034
2019-03-02 04:00:00	2.127
2019-03-02 05:00:00	2.335
2019-03-02 06:00:00	2.598
2019-03-02 07:00:00	2.811
2019-03-02 08:00:00	3.043
2019-03-02 09:00:00	3.171
2019-03-02 10:00:00	3.152
2019-03-02 11:00:00	2.969
2019-03-02 12:00:00	2.813
2019-03-02 13:00:00	2.618
2019-03-02 14:00:00	2.328
2019-03-02 15:00:00	2.208
2019-03-02 16:00:00	2.069
2019-03-02 17:00:00	2.17
2019-03-02 18:00:00	2.263
2019-03-02 19:00:00	2.473
2019-03-02 20:00:00	2.598
2019-03-02 21:00:00	2.758
2019-03-02 22:00:00	2.837
2019-03-02 23:00:00	2.763
2019-03-03	2.62
2019-03-03 01:00:00	2.39
2019-03-03 02:00:00	2.124
2019-03-03 03:00:00	1.905
2019-03-03 04:00:00	1.873
2019-03-03 05:00:00	2.018
2019-03-03 06:00:00	2.149
2019-03-03 07:00:00	2.465
2019-03-03 08:00:00	2.668
2019-03-03 09:00:00	2.885
2019-03-03 10:00:00	2.995
2019-03-03 11:00:00	3.002
2019-03-03 12:00:00	2.881
2019-03-03 13:00:00	2.609
2019-03-03 14:00:00	2.369
2019-03-03 15:00:00	2.15
2019-03-03 16:00:00	2.007
2019-03-03 17:00:00	1.987
2019-03-03 18:00:00	2.076
2019-03-03 19:00:00	2.268
2019-03-03 20:00:00	2.532
2019-03-03 21:00:00	2.791
2019-03-03 22:00:00	2.91
2019-03-03 23:00:00	2.97
2019-03-04	2.889
2019-03-04 01:00:00	2.712
2019-03-04 02:00:00	2.472
2019-03-04 03:00:00	2.278
2019-03-04 04:00:00	2.197
2019-03-04 05:00:00	2.12
2019-03-04 06:00:00	2.251
2019-03-04 07:00:00	2.375
2019-03-04 08:00:00	2.792
2019-03-04 09:00:00	3.202
2019-03-04 10:00:00	3.3
2019-03-04 11:00:00	3.305
2019-03-04 12:00:00	3.281
2019-03-04 13:00:00	3.04
2019-03-04 14:00:00	2.808
2019-03-04 15:00:00	2.426
2019-03-04 16:00:00	2.24
2019-03-04 17:00:00	2.033
2019-03-04 18:00:00	2.064
2019-03-04 19:00:00	2.152
2019-03-04 20:00:00	2.309
2019-03-04 21:00:00	2.625
2019-03-04 22:00:00	2.73
2019-03-04 23:00:00	2.838
2019-03-05	2.805
2019-03-05 01:00:00	2.621
2019-03-05 02:00:00	2.285
2019-03-05 03:00:00	2.036
2019-03-05 04:00:00	1.783
2019-03-05 05:00:00	1.648
2019-03-05 06:00:00	1.645
2019-03-05 07:00:00	1.863
2019-03-05 08:00:00	2.135
2019-03-05 09:00:00	2.457
2019-03-05 10:00:00	2.776
2019-03-05 11:00:00	2.963
2019-03-05 12:00:00	3.019
2019-03-05 13:00:00	2.903
2019-03-05 14:00:00	2.695
2019-03-05 15:00:00	2.382
2019-03-05 16:00:00	2.044
2019-03-05 17:00:00	1.891
2019-03-05 18:00:00	1.789
2019-03-05 19:00:00	1.874
2019-03-05 20:00:00	2.059
2019-03-05 21:00:00	2.352
2019-03-05 22:00:00	2.609
2019-03-05 23:00:00	2.76
2019-03-06	2.817
2019-03-06 01:00:00	2.702
2019-03-06 02:00:00	2.43
2019-03-06 03:00:00	2.136
2019-03-06 04:00:00	1.892
2019-03-06 05:00:00	1.577
2019-03-06 06:00:00	1.434
2019-03-06 07:00:00	1.467
2019-03-06 08:00:00	1.705
2019-03-06 09:00:00	2.078
2019-03-06 10:00:00	2.492
2019-03-06 11:00:00	2.768
2019-03-06 12:00:00	2.898
2019-03-06 13:00:00	2.843
2019-03-06 14:00:00	2.693
2019-03-06 15:00:00	2.374
2019-03-06 16:00:00	2.016
2019-03-06 17:00:00	1.732
2019-03-06 18:00:00	1.569
2019-03-06 19:00:00	1.549
2019-03-06 20:00:00	1.706
2019-03-06 21:00:00	1.918
2019-03-06 22:00:00	2.186
2019-03-06 23:00:00	2.479
2019-03-07	2.62
2019-03-07 01:00:00	2.612
2019-03-07 02:00:00	2.412
2019-03-07 03:00:00	2.194
2019-03-07 04:00:00	1.904
2019-03-07 05:00:00	1.663
2019-03-07 06:00:00	1.443
2019-03-07 07:00:00	1.478
2019-03-07 08:00:00	1.658
2019-03-07 09:00:00	1.947
2019-03-07 10:00:00	2.307
2019-03-07 11:00:00	2.615
2019-03-07 12:00:00	2.788
2019-03-07 13:00:00	2.868
2019-03-07 14:00:00	2.722
2019-03-07 15:00:00	2.403
2019-03-07 16:00:00	2.065
2019-03-07 17:00:00	1.79
2019-03-07 18:00:00	1.579
2019-03-07 19:00:00	1.472
2019-03-07 20:00:00	1.569
2019-03-07 21:00:00	1.754
2019-03-07 22:00:00	2.101
2019-03-07 23:00:00	2.442
2019-03-08	2.609
2019-03-08 01:00:00	2.692
2019-03-08 02:00:00	2.63
2019-03-08 03:00:00	2.431
2019-03-08 04:00:00	2.19
2019-03-08 05:00:00	1.911
2019-03-08 06:00:00	1.624
2019-03-08 07:00:00	1.545
2019-03-08 08:00:00	1.596
2019-03-08 09:00:00	1.809
2019-03-08 10:00:00	2.081
2019-03-08 11:00:00	2.399
2019-03-08 12:00:00	2.644
2019-03-08 13:00:00	2.844
2019-03-08 14:00:00	2.81
2019-03-08 15:00:00	2.618
2019-03-08 16:00:00	2.276
2019-03-08 17:00:00	1.992
2019-03-08 18:00:00	1.677
2019-03-08 19:00:00	1.523
2019-03-08 20:00:00	1.514
2019-03-08 21:00:00	1.692
2019-03-08 22:00:00	2.019
2019-03-08 23:00:00	2.364
2019-03-09	2.576
2019-03-09 01:00:00	2.764
2019-03-09 02:00:00	2.796
2019-03-09 03:00:00	2.659
2019-03-09 04:00:00	2.43
2019-03-09 05:00:00	2.127
2019-03-09 06:00:00	1.827
2019-03-09 07:00:00	1.652
2019-03-09 08:00:00	1.598
2019-03-09 09:00:00	1.706
2019-03-09 10:00:00	1.919
2019-03-09 11:00:00	2.265
2019-03-09 12:00:00	2.57
2019-03-09 13:00:00	2.771
2019-03-09 14:00:00	2.826
2019-03-09 15:00:00	2.729
2019-03-09 16:00:00	2.423
2019-03-09 17:00:00	2.148
2019-03-09 18:00:00	1.87
2019-03-09 19:00:00	1.612
2019-03-09 20:00:00	1.53
2019-03-09 21:00:00	1.591
2019-03-09 22:00:00	1.912
2019-03-09 23:00:00	2.223
2019-03-10	2.48
2019-03-10 01:00:00	2.691
2019-03-10 02:00:00	2.873
2019-03-10 03:00:00	2.842
2019-03-10 04:00:00	2.649
2019-03-10 05:00:00	2.326
2019-03-10 06:00:00	2.065
2019-03-10 07:00:00	1.845
2019-03-10 08:00:00	1.778
2019-03-10 09:00:00	1.842
2019-03-10 10:00:00	2.052
2019-03-10 11:00:00	2.258
2019-03-10 12:00:00	2.699
2019-03-10 13:00:00	2.962
2019-03-10 14:00:00	3.121
2019-03-10 15:00:00	3.149
2019-03-10 16:00:00	2.937
2019-03-10 17:00:00	2.582
2019-03-10 18:00:00	2.293
2019-03-10 19:00:00	1.994
2019-03-10 20:00:00	1.875
2019-03-10 21:00:00	1.901
2019-03-10 22:00:00	2.056
2019-03-10 23:00:00	2.361
2019-03-11	2.661
2019-03-11 01:00:00	2.946
2019-03-11 02:00:00	3.049
2019-03-11 03:00:00	3.07
2019-03-11 04:00:00	2.997
2019-03-11 05:00:00	2.74
2019-03-11 06:00:00	2.416
2019-03-11 07:00:00	2.161
2019-03-11 08:00:00	1.933
2019-03-11 09:00:00	1.812
2019-03-11 10:00:00	1.803
2019-03-11 11:00:00	2.012
2019-03-11 12:00:00	2.309
2019-03-11 13:00:00	2.534
2019-03-11 14:00:00	2.714
2019-03-11 15:00:00	2.781
2019-03-11 16:00:00	2.706
2019-03-11 17:00:00	2.485
2019-03-11 18:00:00	2.214
2019-03-11 19:00:00	1.926
2019-03-11 20:00:00	1.707
2019-03-11 21:00:00	1.62
2019-03-11 22:00:00	1.64
2019-03-11 23:00:00	1.83
2019-03-12	2.085
2019-03-12 01:00:00	2.368
2019-03-12 02:00:00	2.614
2019-03-12 03:00:00	2.757
2019-03-12 04:00:00	2.79
2019-03-12 05:00:00	2.644
2019-03-12 06:00:00	2.377
2019-03-12 07:00:00	2.085
2019-03-12 08:00:00	1.865
2019-03-12 09:00:00	1.588
2019-03-12 10:00:00	1.55
2019-03-12 11:00:00	1.699
2019-03-12 12:00:00	1.967
2019-03-12 13:00:00	2.224
2019-03-12 14:00:00	2.407
2019-03-12 15:00:00	2.542
2019-03-12 16:00:00	2.565
2019-03-12 17:00:00	2.546
2019-03-12 18:00:00	2.383
2019-03-12 19:00:00	2.138
2019-03-12 20:00:00	1.87
2019-03-12 21:00:00	1.692
2019-03-12 22:00:00	1.623
2019-03-12 23:00:00	1.645
2019-03-13	1.836
2019-03-13 01:00:00	2.115
2019-03-13 02:00:00	2.395
2019-03-13 03:00:00	2.674
2019-03-13 04:00:00	2.769
2019-03-13 05:00:00	2.708
2019-03-13 06:00:00	2.552
2019-03-13 07:00:00	2.362
2019-03-13 08:00:00	2.18
2019-03-13 09:00:00	1.935
2019-03-13 10:00:00	1.772
2019-03-13 11:00:00	1.754
2019-03-13 12:00:00	1.869
2019-03-13 13:00:00	2.114
2019-03-13 14:00:00	2.3
2019-03-13 15:00:00	2.486
2019-03-13 16:00:00	2.608
2019-03-13 17:00:00	2.656
2019-03-13 18:00:00	2.574
2019-03-13 19:00:00	2.366
2019-03-13 20:00:00	2.118
2019-03-13 21:00:00	1.935
2019-03-13 22:00:00	1.785
2019-03-13 23:00:00	1.713
2019-03-14	1.822
2019-03-14 01:00:00	1.969
2019-03-14 02:00:00	2.251
2019-03-14 03:00:00	2.51
2019-03-14 04:00:00	2.714
2019-03-14 05:00:00	2.787
2019-03-14 06:00:00	2.736
2019-03-14 07:00:00	2.662
2019-03-14 08:00:00	2.497
2019-03-14 09:00:00	2.217
2019-03-14 10:00:00	1.996
2019-03-14 11:00:00	1.812
2019-03-14 12:00:00	1.793
2019-03-14 13:00:00	1.908
2019-03-14 14:00:00	2.075
2019-03-14 15:00:00	2.237
2019-03-14 16:00:00	2.44
2019-03-14 17:00:00	2.57
2019-03-14 18:00:00	2.622
2019-03-14 19:00:00	2.518
2019-03-14 20:00:00	2.301
2019-03-14 21:00:00	2.184
2019-03-14 22:00:00	1.964
2019-03-14 23:00:00	1.855
2019-03-15	1.791
2019-03-15 01:00:00	1.862
2019-03-15 02:00:00	2.02
2019-03-15 03:00:00	2.285
2019-03-15 04:00:00	2.55
2019-03-15 05:00:00	2.729
2019-03-15 06:00:00	2.808
2019-03-15 07:00:00	2.794
2019-03-15 08:00:00	2.672
2019-03-15 09:00:00	2.428
2019-03-15 10:00:00	2.125
2019-03-15 11:00:00	1.923
2019-03-15 12:00:00	1.762
2019-03-15 13:00:00	1.735
2019-03-15 14:00:00	1.783
2019-03-15 15:00:00	1.901
2019-03-15 16:00:00	2.104
2019-03-15 17:00:00	2.237
2019-03-15 18:00:00	2.389
2019-03-15 19:00:00	2.468
2019-03-15 20:00:00	2.388
2019-03-15 21:00:00	2.311
2019-03-15 22:00:00	2.116
2019-03-15 23:00:00	1.923
2019-03-16	1.73
2019-03-16 01:00:00	1.632
2019-03-16 02:00:00	1.647
2019-03-16 03:00:00	1.882
2019-03-16 04:00:00	2.172
2019-03-16 05:00:00	2.413
2019-03-16 06:00:00	2.569
2019-03-16 07:00:00	2.713
2019-03-16 08:00:00	2.712
2019-03-16 09:00:00	2.539
2019-03-16 10:00:00	2.34
2019-03-16 11:00:00	2.144
2019-03-16 12:00:00	1.848
2019-03-16 13:00:00	1.701
2019-03-16 14:00:00	1.611
2019-03-16 15:00:00	1.574
2019-03-16 16:00:00	1.731
2019-03-16 17:00:00	1.98
2019-03-16 18:00:00	2.21
2019-03-16 19:00:00	2.386
2019-03-16 20:00:00	2.409
2019-03-16 21:00:00	2.457
2019-03-16 22:00:00	2.325
2019-03-16 23:00:00	2.039
2019-03-17	1.798
2019-03-17 01:00:00	1.6
2019-03-17 02:00:00	1.437
2019-03-17 03:00:00	1.476
2019-03-17 04:00:00	1.69
2019-03-17 05:00:00	2.04
2019-03-17 06:00:00	2.326
2019-03-17 07:00:00	2.578
2019-03-17 08:00:00	2.759
2019-03-17 09:00:00	2.776
2019-03-17 10:00:00	2.681
2019-03-17 11:00:00	2.501
2019-03-17 12:00:00	2.172
2019-03-17 13:00:00	1.909
2019-03-17 14:00:00	1.646
2019-03-17 15:00:00	1.493
2019-03-17 16:00:00	1.498
2019-03-17 17:00:00	1.68
2019-03-17 18:00:00	1.96
2019-03-17 19:00:00	2.235
2019-03-17 20:00:00	2.448
2019-03-17 21:00:00	2.546
2019-03-17 22:00:00	2.546
2019-03-17 23:00:00	2.368
2019-03-18	2.076
2019-03-18 01:00:00	1.785
2019-03-18 02:00:00	1.512
2019-03-18 03:00:00	1.427
2019-03-18 04:00:00	1.461
2019-03-18 05:00:00	1.745
2019-03-18 06:00:00	2.128
2019-03-18 07:00:00	2.487
2019-03-18 08:00:00	2.801
2019-03-18 09:00:00	3.019
2019-03-18 10:00:00	3.053
2019-03-18 11:00:00	2.92
2019-03-18 12:00:00	2.675
2019-03-18 13:00:00	2.308
2019-03-18 14:00:00	1.926
2019-03-18 15:00:00	1.636
2019-03-18 16:00:00	1.462
2019-03-18 17:00:00	1.493
2019-03-18 18:00:00	1.71
2019-03-18 19:00:00	2.063
2019-03-18 20:00:00	2.391
2019-03-18 21:00:00	2.616
2019-03-18 22:00:00	2.772
2019-03-18 23:00:00	2.698
2019-03-19	2.496
2019-03-19 01:00:00	2.134
2019-03-19 02:00:00	1.77
2019-03-19 03:00:00	1.503
2019-03-19 04:00:00	1.32
2019-03-19 05:00:00	1.406
2019-03-19 06:00:00	1.662
2019-03-19 07:00:00	2.037
2019-03-19 08:00:00	2.465
2019-03-19 09:00:00	2.759
2019-03-19 10:00:00	2.926
2019-03-19 11:00:00	3.004
2019-03-19 12:00:00	2.869
2019-03-19 13:00:00	2.51
2019-03-19 14:00:00	2.091
2019-03-19 15:00:00	1.716
2019-03-19 16:00:00	1.4
2019-03-19 17:00:00	1.283
2019-03-19 18:00:00	1.355
2019-03-19 19:00:00	1.731
2019-03-19 20:00:00	2.161
2019-03-19 21:00:00	2.522
2019-03-19 22:00:00	2.758
2019-03-19 23:00:00	2.904
2019-03-20	2.837
2019-03-20 01:00:00	2.549
2019-03-20 02:00:00	2.142
2019-03-20 03:00:00	1.778
2019-03-20 04:00:00	1.461
2019-03-20 05:00:00	1.252
2019-03-20 06:00:00	1.273
2019-03-20 07:00:00	1.585
2019-03-20 08:00:00	2.081
2019-03-20 09:00:00	2.51
2019-03-20 10:00:00	2.829
2019-03-20 11:00:00	3.023
2019-03-20 12:00:00	3.04
2019-03-20 13:00:00	2.892
2019-03-20 14:00:00	2.507
2019-03-20 15:00:00	2.039
2019-03-20 16:00:00	1.668
2019-03-20 17:00:00	1.348
2019-03-20 18:00:00	1.261
2019-03-20 19:00:00	1.409
2019-03-20 20:00:00	1.778
2019-03-20 21:00:00	2.28
2019-03-20 22:00:00	2.68
2019-03-20 23:00:00	2.929
2019-03-21	3.096
2019-03-21 01:00:00	2.969
2019-03-21 02:00:00	2.687
2019-03-21 03:00:00	2.244
2019-03-21 04:00:00	1.787
2019-03-21 05:00:00	1.469
2019-03-21 06:00:00	1.301
2019-03-21 07:00:00	1.402
2019-03-21 08:00:00	1.779
2019-03-21 09:00:00	2.256
2019-03-21 10:00:00	2.694
2019-03-21 11:00:00	3.06
2019-03-21 12:00:00	3.23
2019-03-21 13:00:00	3.255
2019-03-21 14:00:00	3.038
2019-03-21 15:00:00	2.639
2019-03-21 16:00:00	2.2
2019-03-21 17:00:00	1.821
2019-03-21 18:00:00	1.55
2019-03-21 19:00:00	1.547
2019-03-21 20:00:00	1.629
2019-03-21 21:00:00	2.101
2019-03-21 22:00:00	2.699
2019-03-21 23:00:00	3.062
2019-03-22	3.242
2019-03-22 01:00:00	3.436
2019-03-22 02:00:00	3.19
2019-03-22 03:00:00	2.985
2019-03-22 04:00:00	2.371
2019-03-22 05:00:00	1.791
2019-03-22 06:00:00	1.537
2019-03-22 07:00:00	1.424
2019-03-22 08:00:00	1.601
2019-03-22 09:00:00	1.862
2019-03-22 10:00:00	2.35
2019-03-22 11:00:00	2.701
2019-03-22 12:00:00	2.878
2019-03-22 13:00:00	3.132
2019-03-22 14:00:00	3.177
2019-03-22 15:00:00	2.898
2019-03-22 16:00:00	2.54
2019-03-22 17:00:00	2.033
2019-03-22 18:00:00	1.692
2019-03-22 19:00:00	1.593
2019-03-22 20:00:00	1.688
2019-03-22 21:00:00	1.934
2019-03-22 22:00:00	2.262
2019-03-22 23:00:00	2.713
2019-03-23	3.062
2019-03-23 01:00:00	3.188
2019-03-23 02:00:00	3.228
2019-03-23 03:00:00	2.947
2019-03-23 04:00:00	2.657
2019-03-23 05:00:00	1.99
2019-03-23 06:00:00	1.43
2019-03-23 07:00:00	1.155
2019-03-23 08:00:00	1.126
2019-03-23 09:00:00	1.247
2019-03-23 10:00:00	1.376
2019-03-23 11:00:00	1.845
2019-03-23 12:00:00	2.242
2019-03-23 13:00:00	2.577
2019-03-23 14:00:00	2.537
2019-03-23 15:00:00	2.453
2019-03-23 16:00:00	2.279
2019-03-23 17:00:00	1.967
2019-03-23 18:00:00	1.511
2019-03-23 19:00:00	1.14
2019-03-23 20:00:00	1.089
2019-03-23 21:00:00	1.147
2019-03-23 22:00:00	1.441
2019-03-23 23:00:00	1.791
2019-03-24	2.255
2019-03-24 01:00:00	2.569
2019-03-24 02:00:00	2.735
2019-03-24 03:00:00	2.721
2019-03-24 04:00:00	2.533
2019-03-24 05:00:00	2.221
2019-03-24 06:00:00	1.784
2019-03-24 07:00:00	1.413
2019-03-24 08:00:00	1.2
2019-03-24 09:00:00	1.177
2019-03-24 10:00:00	1.343
2019-03-24 11:00:00	1.704
2019-03-24 12:00:00	2.119
2019-03-24 13:00:00	2.478
2019-03-24 14:00:00	2.706
2019-03-24 15:00:00	2.816
2019-03-24 16:00:00	2.661
2019-03-24 17:00:00	2.452
2019-03-24 18:00:00	2.096
2019-03-24 19:00:00	1.78
2019-03-24 20:00:00	1.588
2019-03-24 21:00:00	1.479
2019-03-24 22:00:00	1.628
2019-03-24 23:00:00	1.857
2019-03-25	2.243
2019-03-25 01:00:00	2.554
2019-03-25 02:00:00	2.76
2019-03-25 03:00:00	2.916
2019-03-25 04:00:00	2.903
2019-03-25 05:00:00	2.62
[truncated: 20,634 more rows]

## Sheet: Plymouth Dockyard
Location: Plymouth Dockyard
Source:
Date Time (GMT)	Height(m)
2019-01-01	4.209
2019-01-01 00:15:00	4.293
2019-01-01 00:30:00	4.361
2019-01-01 00:45:00	4.422
2019-01-01 01:00:00	4.455
2019-01-01 01:15:00	4.486
2019-01-01 01:30:00	4.528
2019-01-01 01:45:00	4.532
2019-01-01 02:00:00	4.507
2019-01-01 02:15:00	4.478
2019-01-01 02:30:00	4.427
2019-01-01 02:45:00	4.355
2019-01-01 03:00:00	4.281
2019-01-01 03:15:00	4.18
2019-01-01 03:30:00	4.053
2019-01-01 03:45:00	3.935
2019-01-01 04:00:00	3.808
2019-01-01 04:15:00	3.656
2019-01-01 04:30:00	3.478
2019-01-01 04:45:00	3.305
2019-01-01 05:00:00	3.144
2019-01-01 05:15:00	2.964
2019-01-01 05:30:00	2.78
2019-01-01 05:45:00	2.618
2019-01-01 06:00:00	2.444
2019-01-01 06:15:00	2.301
2019-01-01 06:30:00	2.167
2019-01-01 06:45:00	2.043
2019-01-01 07:00:00	1.957
2019-01-01 07:15:00	1.886
2019-01-01 07:30:00	1.85
2019-01-01 07:45:00	1.845
2019-01-01 08:00:00	1.85
2019-01-01 08:15:00	1.885
2019-01-01 08:30:00	1.937
2019-01-01 08:45:00	2.019
2019-01-01 09:00:00	2.144
2019-01-01 09:15:00	2.298
2019-01-01 09:30:00	2.494
2019-01-01 09:45:00	2.688
2019-01-01 10:00:00	2.897
2019-01-01 10:15:00	3.094
2019-01-01 10:30:00	3.294
2019-01-01 10:45:00	3.485
2019-01-01 11:00:00	3.656
2019-01-01 11:15:00	3.821
2019-01-01 11:30:00	3.963
2019-01-01 11:45:00	4.08
2019-01-01 12:00:00	4.188
2019-01-01 12:15:00	4.304
2019-01-01 12:30:00	4.395
2019-01-01 12:45:00	4.469
2019-01-01 13:00:00	4.538
2019-01-01 13:15:00	4.592
2019-01-01 13:30:00	4.621
2019-01-01 13:45:00	4.654
2019-01-01 14:00:00	4.67
2019-01-01 14:15:00	4.663
2019-01-01 14:30:00	4.636
2019-01-01 14:45:00	4.608
2019-01-01 15:00:00	4.559
2019-01-01 15:15:00	4.498
2019-01-01 15:30:00	4.424
2019-01-01 15:45:00	4.338
2019-01-01 16:00:00	4.224
2019-01-01 16:15:00	4.09
2019-01-01 16:30:00	3.945
2019-01-01 16:45:00	3.775
2019-01-01 17:00:00	3.593
2019-01-01 17:15:00	3.409
2019-01-01 17:30:00	3.206
2019-01-01 17:45:00	3.009
2019-01-01 18:00:00	2.805
2019-01-01 18:15:00	2.631
2019-01-01 18:30:00	2.47
2019-01-01 18:45:00	2.299
2019-01-01 19:00:00	2.157
2019-01-01 19:15:00	2.033
2019-01-01 19:30:00	1.935
2019-01-01 19:45:00	1.831
2019-01-01 20:00:00	1.77
2019-01-01 20:15:00	1.737
2019-01-01 20:30:00	1.735
2019-01-01 20:45:00	1.758
2019-01-01 21:00:00	1.803
2019-01-01 21:15:00	1.905
2019-01-01 21:30:00	2.02
2019-01-01 21:45:00	2.159
2019-01-01 22:00:00	2.335
2019-01-01 22:15:00	2.534
2019-01-01 22:30:00	2.752
2019-01-01 22:45:00	2.972
2019-01-01 23:00:00	3.176
2019-01-01 23:15:00	3.364
2019-01-01 23:30:00	3.561
2019-01-01 23:45:00	3.755
2019-01-02	3.916
2019-01-02 00:15:00	4.049
2019-01-02 00:30:00	4.173
2019-01-02 00:45:00	4.292
2019-01-02 01:00:00	4.399
2019-01-02 01:15:00	4.483
2019-01-02 01:30:00	4.559
2019-01-02 01:45:00	4.621
2019-01-02 02:00:00	4.667
2019-01-02 02:15:00	4.711
2019-01-02 02:30:00	4.741
2019-01-02 02:45:00	4.732
2019-01-02 03:00:00	4.725
2019-01-02 03:15:00	4.702
2019-01-02 03:30:00	4.659
2019-01-02 03:45:00	4.587
2019-01-02 04:00:00	4.507
2019-01-02 04:15:00	4.402
2019-01-02 04:30:00	4.294
2019-01-02 04:45:00	4.161
2019-01-02 05:00:00	4.01
2019-01-02 05:15:00	3.843
2019-01-02 05:30:00	3.661
2019-01-02 05:45:00	3.476
2019-01-02 06:00:00	3.288
2019-01-02 06:15:00	3.078
2019-01-02 06:30:00	2.871
2019-01-02 06:45:00	2.661
2019-01-02 07:00:00	2.467
2019-01-02 07:15:00	2.29
2019-01-02 07:30:00	2.116
2019-01-02 07:45:00	1.972
2019-01-02 08:00:00	1.852
2019-01-02 08:15:00	1.762
2019-01-02 08:30:00	1.691
2019-01-02 08:45:00	1.651
2019-01-02 09:00:00	1.625
2019-01-02 09:15:00	1.639
2019-01-02 09:30:00	1.699
2019-01-02 09:45:00	1.778
2019-01-02 10:00:00	1.899
2019-01-02 10:15:00	2.044
2019-01-02 10:30:00	2.214
2019-01-02 10:45:00	2.415
2019-01-02 11:00:00	2.635
2019-01-02 11:15:00	2.868
2019-01-02 11:30:00	3.103
2019-01-02 11:45:00	3.309
2019-01-02 12:00:00	3.502
2019-01-02 12:15:00	3.682
2019-01-02 12:30:00	3.841
2019-01-02 12:45:00	3.993
2019-01-02 13:00:00	4.118
2019-01-02 13:15:00	4.227
2019-01-02 13:30:00	4.346
2019-01-02 13:45:00	4.437
2019-01-02 14:00:00	4.508
2019-01-02 14:15:00	4.569
2019-01-02 14:30:00	4.628
2019-01-02 14:45:00	4.671
2019-01-02 15:00:00	4.678
2019-01-02 15:15:00	4.664
2019-01-02 15:30:00	4.645
2019-01-02 15:45:00	4.613
2019-01-02 16:00:00	4.546
2019-01-02 16:15:00	4.47
2019-01-02 16:30:00	4.383
2019-01-02 16:45:00	4.275
2019-01-02 17:00:00	4.15
2019-01-02 17:15:00	4.008
2019-01-02 17:30:00	3.844
2019-01-02 17:45:00	3.665
2019-01-02 18:00:00	3.479
2019-01-02 18:15:00	3.281
2019-01-02 18:30:00	3.057
2019-01-02 18:45:00	2.854
2019-01-02 19:00:00	2.652
2019-01-02 19:15:00	2.449
2019-01-02 19:30:00	2.262
2019-01-02 19:45:00	2.091
2019-01-02 20:00:00	1.932
2019-01-02 20:15:00	1.782
2019-01-02 20:30:00	1.652
2019-01-02 20:45:00	1.558
2019-01-02 21:00:00	1.485
2019-01-02 21:15:00	1.436
2019-01-02 21:30:00	1.428
2019-01-02 21:45:00	1.459
2019-01-02 22:00:00	1.507
2019-01-02 22:15:00	1.585
2019-01-02 22:30:00	1.715
2019-01-02 22:45:00	1.873
2019-01-02 23:00:00	2.053
2019-01-02 23:15:00	2.264
2019-01-02 23:30:00	2.503
2019-01-02 23:45:00	2.743
2019-01-03	2.987
2019-01-03 00:15:00	3.223
2019-01-03 00:30:00	3.436
2019-01-03 00:45:00	3.638
2019-01-03 01:00:00	3.815
2019-01-03 01:15:00	3.982
2019-01-03 01:30:00	4.116
2019-01-03 01:45:00	4.248
2019-01-03 02:00:00	4.363
2019-01-03 02:15:00	4.47
2019-01-03 02:30:00	4.564
2019-01-03 02:45:00	4.639
2019-01-03 03:00:00	4.713
2019-01-03 03:15:00	4.764
2019-01-03 03:30:00	4.783
2019-01-03 03:45:00	4.79
2019-01-03 04:00:00	4.775
2019-01-03 04:15:00	4.72
2019-01-03 04:30:00	4.656
2019-01-03 04:45:00	4.581
2019-01-03 05:00:00	4.475
2019-01-03 05:15:00	4.347
2019-01-03 05:30:00	4.215
2019-01-03 05:45:00	4.068
2019-01-03 06:00:00	3.913
2019-01-03 06:15:00	3.733
2019-01-03 06:30:00	3.538
2019-01-03 06:45:00	3.325
2019-01-03 07:00:00	3.128
2019-01-03 07:15:00	2.915
2019-01-03 07:30:00	2.694
2019-01-03 07:45:00	2.481
2019-01-03 08:00:00	2.284
2019-01-03 08:15:00	2.091
2019-01-03 08:30:00	1.919
2019-01-03 08:45:00	1.775
2019-01-03 09:00:00	1.655
2019-01-03 09:15:00	1.553
2019-01-03 09:30:00	1.489
2019-01-03 09:45:00	1.439
2019-01-03 10:00:00	1.421
2019-01-03 10:15:00	1.454
2019-01-03 10:30:00	1.521
2019-01-03 10:45:00	1.626
2019-01-03 11:00:00	1.787
2019-01-03 11:15:00	1.965
2019-01-03 11:30:00	2.178
2019-01-03 11:45:00	2.415
2019-01-03 12:00:00	2.662
2019-01-03 12:15:00	2.91
2019-01-03 12:30:00	3.16
2019-01-03 12:45:00	3.376
2019-01-03 13:00:00	3.58
2019-01-03 13:15:00	3.772
2019-01-03 13:30:00	3.938
2019-01-03 13:45:00	4.077
2019-01-03 14:00:00	4.207
2019-01-03 14:15:00	4.336
2019-01-03 14:30:00	4.451
2019-01-03 14:45:00	4.55
2019-01-03 15:00:00	4.628
2019-01-03 15:15:00	4.694
2019-01-03 15:30:00	4.763
2019-01-03 15:45:00	4.801
2019-01-03 16:00:00	4.814
2019-01-03 16:15:00	4.81
2019-01-03 16:30:00	4.785
2019-01-03 16:45:00	4.732
2019-01-03 17:00:00	4.668
2019-01-03 17:15:00	4.572
2019-01-03 17:30:00	4.454
2019-01-03 17:45:00	4.313
2019-01-03 18:00:00	4.172
2019-01-03 18:15:00	4.015
2019-01-03 18:30:00	3.829
2019-01-03 18:45:00	3.619
2019-01-03 19:00:00	3.411
2019-01-03 19:15:00	3.185
2019-01-03 19:30:00	2.954
2019-01-03 19:45:00	2.74
2019-01-03 20:00:00	2.524
2019-01-03 20:15:00	2.309
2019-01-03 20:30:00	2.111
2019-01-03 20:45:00	1.93
2019-01-03 21:00:00	1.755
2019-01-03 21:15:00	1.609
2019-01-03 21:30:00	1.497
2019-01-03 21:45:00	1.385
2019-01-03 22:00:00	1.317
2019-01-03 22:15:00	1.287
2019-01-03 22:30:00	1.288
2019-01-03 22:45:00	1.322
2019-01-03 23:00:00	1.403
2019-01-03 23:15:00	1.524
2019-01-03 23:30:00	1.697
2019-01-03 23:45:00	1.913
2019-01-04	2.143
2019-01-04 00:15:00	2.396
2019-01-04 00:30:00	2.663
2019-01-04 00:45:00	2.934
2019-01-04 01:00:00	3.178
2019-01-04 01:15:00	3.411
2019-01-04 01:30:00	3.637
2019-01-04 01:45:00	3.834
2019-01-04 02:00:00	4.021
2019-01-04 02:15:00	4.182
2019-01-04 02:30:00	4.336
2019-01-04 02:45:00	4.478
2019-01-04 03:00:00	4.607
2019-01-04 03:15:00	4.721
2019-01-04 03:30:00	4.806
2019-01-04 03:45:00	4.887
2019-01-04 04:00:00	4.941
2019-01-04 04:15:00	4.996
2019-01-04 04:30:00	5.008
2019-01-04 04:45:00	4.978
2019-01-04 05:00:00	4.937
2019-01-04 05:15:00	4.885
2019-01-04 05:30:00	4.799
2019-01-04 05:45:00	4.689
2019-01-04 06:00:00	4.563
2019-01-04 06:15:00	4.427
2019-01-04 06:30:00	4.276
2019-01-04 06:45:00	4.105
2019-01-04 07:00:00	3.898
2019-01-04 07:15:00	3.686
2019-01-04 07:30:00	3.465
2019-01-04 07:45:00	3.228
2019-01-04 08:00:00	2.991
2019-01-04 08:15:00	2.739
2019-01-04 08:30:00	2.507
2019-01-04 08:45:00	2.287
2019-01-04 09:00:00	2.077
2019-01-04 09:15:00	1.886
2019-01-04 09:30:00	1.714
2019-01-04 09:45:00	1.565
2019-01-04 10:00:00	1.443
2019-01-04 10:15:00	1.339
2019-01-04 10:30:00	1.291
2019-01-04 10:45:00	1.275
2019-01-04 11:00:00	1.297
2019-01-04 11:15:00	1.349
2019-01-04 11:30:00	1.451
2019-01-04 11:45:00	1.603
2019-01-04 12:00:00	1.781
2019-01-04 12:15:00	2.005
2019-01-04 12:30:00	2.257
2019-01-04 12:45:00	2.515
2019-01-04 13:00:00	2.799
2019-01-04 13:15:00	3.055
2019-01-04 13:30:00	3.29
2019-01-04 13:45:00	3.512
2019-01-04 14:00:00	3.726
2019-01-04 14:15:00	3.917
2019-01-04 14:30:00	4.083
2019-01-04 14:45:00	4.233
2019-01-04 15:00:00	4.374
2019-01-04 15:15:00	4.494
2019-01-04 15:30:00	4.609
2019-01-04 15:45:00	4.72
2019-01-04 16:00:00	4.795
2019-01-04 16:15:00	4.85
2019-01-04 16:30:00	4.904
2019-01-04 16:45:00	4.94
2019-01-04 17:00:00	4.921
2019-01-04 17:15:00	4.885
2019-01-04 17:30:00	4.833
2019-01-04 17:45:00	4.75
2019-01-04 18:00:00	4.651
2019-01-04 18:15:00	4.546
2019-01-04 18:30:00	4.408
2019-01-04 18:45:00	4.26
2019-01-04 19:00:00	4.106
2019-01-04 19:15:00	3.922
2019-01-04 19:30:00	3.711
2019-01-04 19:45:00	3.502
2019-01-04 20:00:00	3.278
2019-01-04 20:15:00	3.025
2019-01-04 20:30:00	2.774
2019-01-04 20:45:00	2.543
2019-01-04 21:00:00	2.304
2019-01-04 21:15:00	2.078
2019-01-04 21:30:00	1.879
2019-01-04 21:45:00	1.706
2019-01-04 22:00:00	1.54
2019-01-04 22:15:00	1.41
2019-01-04 22:30:00	1.316
2019-01-04 22:45:00	1.229
2019-01-04 23:00:00	1.184
2019-01-04 23:15:00	1.191
2019-01-04 23:30:00	1.238
2019-01-04 23:45:00	1.318
2019-01-05	1.46
2019-01-05 00:15:00	1.638
2019-01-05 00:30:00	1.852
2019-01-05 00:45:00	2.118
2019-01-05 01:00:00	2.4
2019-01-05 01:15:00	2.688
2019-01-05 01:30:00	2.978
2019-01-05 01:45:00	3.26
2019-01-05 02:00:00	3.512
2019-01-05 02:15:00	3.748
2019-01-05 02:30:00	3.969
2019-01-05 02:45:00	4.165
2019-01-05 03:00:00	4.321
2019-01-05 03:15:00	4.477
2019-01-05 03:30:00	4.618
2019-01-05 03:45:00	4.752
2019-01-05 04:00:00	4.867
2019-01-05 04:15:00	4.951
2019-01-05 04:30:00	5.027
2019-01-05 04:45:00	5.094
2019-01-05 05:00:00	5.129
2019-01-05 05:15:00	5.126
2019-01-05 05:30:00	5.101
2019-01-05 05:45:00	5.053
2019-01-05 06:00:00	4.984
2019-01-05 06:15:00	4.882
2019-01-05 06:30:00	4.76
2019-01-05 06:45:00	4.621
2019-01-05 07:00:00	4.482
2019-01-05 07:15:00	4.33
2019-01-05 07:30:00	4.15
2019-01-05 07:45:00	3.946
2019-01-05 08:00:00	3.719
2019-01-05 08:15:00	3.483
2019-01-05 08:30:00	3.221
2019-01-05 08:45:00	2.958
2019-01-05 09:00:00	2.713
2019-01-05 09:15:00	2.455
2019-01-05 09:30:00	2.205
2019-01-05 09:45:00	1.979
2019-01-05 10:00:00	1.772
2019-01-05 10:15:00	1.581
2019-01-05 10:30:00	1.431
2019-01-05 10:45:00	1.327
2019-01-05 11:00:00	1.23
2019-01-05 11:15:00	1.165
2019-01-05 11:30:00	1.161
2019-01-05 11:45:00	1.181
2019-01-05 12:00:00	1.249
2019-01-05 12:15:00	1.37
2019-01-05 12:30:00	1.531
2019-01-05 12:45:00	1.733
2019-01-05 13:00:00	1.984
2019-01-05 13:15:00	2.253
2019-01-05 13:30:00	2.539
2019-01-05 13:45:00	2.826
2019-01-05 14:00:00	3.096
2019-01-05 14:15:00	3.353
2019-01-05 14:30:00	3.578
2019-01-05 14:45:00	3.806
2019-01-05 15:00:00	3.992
2019-01-05 15:15:00	4.165
2019-01-05 15:30:00	4.314
2019-01-05 15:45:00	4.457
2019-01-05 16:00:00	4.581
2019-01-05 16:15:00	4.688
2019-01-05 16:30:00	4.786
2019-01-05 16:45:00	4.859
2019-01-05 17:00:00	4.92
2019-01-05 17:15:00	4.972
2019-01-05 17:30:00	4.989
2019-01-05 17:45:00	4.966
2019-01-05 18:00:00	4.919
2019-01-05 18:15:00	4.866
2019-01-05 18:30:00	4.776
2019-01-05 18:45:00	4.672
2019-01-05 19:00:00	4.557
2019-01-05 19:15:00	4.42
2019-01-05 19:30:00	4.259
2019-01-05 19:45:00	4.078
2019-01-05 20:00:00	3.891
2019-01-05 20:15:00	3.681
2019-01-05 20:30:00	3.439
2019-01-05 20:45:00	3.19
2019-01-05 21:00:00	2.927
2019-01-05 21:15:00	2.661
2019-01-05 21:30:00	2.414
2019-01-05 21:45:00	2.178
2019-01-05 22:00:00	1.942
2019-01-05 22:15:00	1.748
2019-01-05 22:30:00	1.567
2019-01-05 22:45:00	1.411
2019-01-05 23:00:00	1.278
2019-01-05 23:15:00	1.161
2019-01-05 23:30:00	1.096
2019-01-05 23:45:00	1.067
2019-01-06	1.085
2019-01-06 00:15:00	1.167
2019-01-06 00:30:00	1.276
2019-01-06 00:45:00	1.414
2019-01-06 01:00:00	1.625
2019-01-06 01:15:00	1.866
2019-01-06 01:30:00	2.143
2019-01-06 01:45:00	2.461
2019-01-06 02:00:00	2.776
2019-01-06 02:15:00	3.065
2019-01-06 02:30:00	3.338
2019-01-06 02:45:00	3.594
2019-01-06 03:00:00	3.842
2019-01-06 03:15:00	4.069
2019-01-06 03:30:00	4.26
2019-01-06 03:45:00	4.427
2019-01-06 04:00:00	4.581
2019-01-06 04:15:00	4.719
2019-01-06 04:30:00	4.848
2019-01-06 04:45:00	4.964
2019-01-06 05:00:00	5.045
2019-01-06 05:15:00	5.101
2019-01-06 05:30:00	5.151
2019-01-06 05:45:00	5.191
2019-01-06 06:00:00	5.187
2019-01-06 06:15:00	5.134
2019-01-06 06:30:00	5.068
2019-01-06 06:45:00	5.001
2019-01-06 07:00:00	4.901
2019-01-06 07:15:00	4.771
2019-01-06 07:30:00	4.613
2019-01-06 07:45:00	4.461
2019-01-06 08:00:00	4.29
2019-01-06 08:15:00	4.1
2019-01-06 08:30:00	3.873
2019-01-06 08:45:00	3.629
2019-01-06 09:00:00	3.381
2019-01-06 09:15:00	3.099
2019-01-06 09:30:00	2.827
2019-01-06 09:45:00	2.552
2019-01-06 10:00:00	2.289
2019-01-06 10:15:00	2.054
2019-01-06 10:30:00	1.831
2019-01-06 10:45:00	1.626
2019-01-06 11:00:00	1.466
2019-01-06 11:15:00	1.309
2019-01-06 11:30:00	1.172
2019-01-06 11:45:00	1.096
2019-01-06 12:00:00	1.06
2019-01-06 12:15:00	1.036
2019-01-06 12:30:00	1.076
2019-01-06 12:45:00	1.162
2019-01-06 13:00:00	1.302
2019-01-06 13:15:00	1.491
2019-01-06 13:30:00	1.721
2019-01-06 13:45:00	1.995
2019-01-06 14:00:00	2.288
2019-01-06 14:15:00	2.584
2019-01-06 14:30:00	2.884
2019-01-06 14:45:00	3.165
2019-01-06 15:00:00	3.427
2019-01-06 15:15:00	3.664
2019-01-06 15:30:00	3.886
2019-01-06 15:45:00	4.077
2019-01-06 16:00:00	4.241
2019-01-06 16:15:00	4.394
2019-01-06 16:30:00	4.529
2019-01-06 16:45:00	4.654
2019-01-06 17:00:00	4.753
2019-01-06 17:15:00	4.846
2019-01-06 17:30:00	4.913
2019-01-06 17:45:00	4.975
2019-01-06 18:00:00	5.009
2019-01-06 18:15:00	5.022
2019-01-06 18:30:00	4.999
2019-01-06 18:45:00	4.951
2019-01-06 19:00:00	4.878
2019-01-06 19:15:00	4.781
2019-01-06 19:30:00	4.676
2019-01-06 19:45:00	4.537
2019-01-06 20:00:00	4.38
2019-01-06 20:15:00	4.214
2019-01-06 20:30:00	4.026
2019-01-06 20:45:00	3.82
2019-01-06 21:00:00	3.587
2019-01-06 21:15:00	3.332
2019-01-06 21:30:00	3.072
2019-01-06 21:45:00	2.816
2019-01-06 22:00:00	2.562
2019-01-06 22:15:00	2.299
2019-01-06 22:30:00	2.044
2019-01-06 22:45:00	1.823
2019-01-06 23:00:00	1.62
2019-01-06 23:15:00	1.444
2019-01-06 23:30:00	1.299
2019-01-06 23:45:00	1.193
2019-01-07	1.114
2019-01-07 00:15:00	1.068
2019-01-07 00:30:00	1.063
2019-01-07 00:45:00	1.109
2019-01-07 01:00:00	1.18
2019-01-07 01:15:00	1.307
2019-01-07 01:30:00	1.499
2019-01-07 01:45:00	1.735
2019-01-07 02:00:00	2.003
2019-01-07 02:15:00	2.312
2019-01-07 02:30:00	2.636
2019-01-07 02:45:00	2.954
2019-01-07 03:00:00	3.244
2019-01-07 03:15:00	3.52
2019-01-07 03:30:00	3.779
2019-01-07 03:45:00	4.006
2019-01-07 04:00:00	4.224
2019-01-07 04:15:00	4.401
2019-01-07 04:30:00	4.57
2019-01-07 04:45:00	4.71
2019-01-07 05:00:00	4.849
2019-01-07 05:15:00	4.97
2019-01-07 05:30:00	5.082
2019-01-07 05:45:00	5.153
2019-01-07 06:00:00	5.21
2019-01-07 06:15:00	5.246
2019-01-07 06:30:00	5.247
2019-01-07 06:45:00	5.219
2019-01-07 07:00:00	5.164
2019-01-07 07:15:00	5.079
2019-01-07 07:30:00	4.964
2019-01-07 07:45:00	4.845
2019-01-07 08:00:00	4.713
2019-01-07 08:15:00	4.552
2019-01-07 08:30:00	4.368
2019-01-07 08:45:00	4.186
2019-01-07 09:00:00	3.976
2019-01-07 09:15:00	3.73
2019-01-07 09:30:00	3.467
2019-01-07 09:45:00	3.189
2019-01-07 10:00:00	2.91
2019-01-07 10:15:00	2.622
2019-01-07 10:30:00	2.359
2019-01-07 10:45:00	2.11
2019-01-07 11:00:00	1.869
2019-01-07 11:15:00	1.664
2019-01-07 11:30:00	1.475
2019-01-07 11:45:00	1.316
2019-01-07 12:00:00	1.174
2019-01-07 12:15:00	1.072
2019-01-07 12:30:00	1.001
2019-01-07 12:45:00	0.97
2019-01-07 13:00:00	0.981
2019-01-07 13:15:00	1.038
2019-01-07 13:30:00	1.16
2019-01-07 13:45:00	1.339
2019-01-07 14:00:00	1.541
2019-01-07 14:15:00	1.802
2019-01-07 14:30:00	2.099
2019-01-07 14:45:00	2.393
2019-01-07 15:00:00	2.709
2019-01-07 15:15:00	3.004
2019-01-07 15:30:00	3.257
2019-01-07 15:45:00	3.518
2019-01-07 16:00:00	3.757
2019-01-07 16:15:00	3.96
2019-01-07 16:30:00	4.129
2019-01-07 16:45:00	4.283
2019-01-07 17:00:00	4.425
2019-01-07 17:15:00	4.553
2019-01-07 17:30:00	4.661
2019-01-07 17:45:00	4.762
2019-01-07 18:00:00	4.848
2019-01-07 18:15:00	4.907
2019-01-07 18:30:00	4.954
2019-01-07 18:45:00	4.985
2019-01-07 19:00:00	4.978
2019-01-07 19:15:00	4.935
2019-01-07 19:30:00	4.86
2019-01-07 19:45:00	4.773
2019-01-07 20:00:00	4.664
2019-01-07 20:15:00	4.54
2019-01-07 20:30:00	4.384
2019-01-07 20:45:00	4.206
2019-01-07 21:00:00	4.03
2019-01-07 21:15:00	3.841
2019-01-07 21:30:00	3.613
2019-01-07 21:45:00	3.365
2019-01-07 22:00:00	3.12
2019-01-07 22:15:00	2.863
2019-01-07 22:30:00	2.595
2019-01-07 22:45:00	2.35
2019-01-07 23:00:00	2.087
2019-01-07 23:15:00	1.862
2019-01-07 23:30:00	1.672
2019-01-07 23:45:00	1.491
2019-01-08	1.33
2019-01-08 00:15:00	1.215
2019-01-08 00:30:00	1.128
2019-01-08 00:45:00	1.068
2019-01-08 01:00:00	1.046
2019-01-08 01:15:00	1.099
2019-01-08 01:30:00	1.175
2019-01-08 01:45:00	1.284
2019-01-08 02:00:00	1.455
2019-01-08 02:15:00	1.679
2019-01-08 02:30:00	1.946
2019-01-08 02:45:00	2.265
2019-01-08 03:00:00	2.581
2019-01-08 03:15:00	2.895
2019-01-08 03:30:00	3.225
2019-01-08 03:45:00	3.503
2019-01-08 04:00:00	3.76
2019-01-08 04:15:00	4.007
2019-01-08 04:30:00	4.254
2019-01-08 04:45:00	4.434
2019-01-08 05:00:00	4.606
2019-01-08 05:15:00	4.759
2019-01-08 05:30:00	4.897
2019-01-08 05:45:00	5.021
2019-01-08 06:00:00	5.143
2019-01-08 06:15:00	5.238
2019-01-08 06:30:00	5.301
2019-01-08 06:45:00	5.348
2019-01-08 07:00:00	5.374
2019-01-08 07:15:00	5.355
2019-01-08 07:30:00	5.318
2019-01-08 07:45:00	5.242
2019-01-08 08:00:00	5.144
2019-01-08 08:15:00	5.034
2019-01-08 08:30:00	4.9
2019-01-08 08:45:00	4.74
2019-01-08 09:00:00	4.567
2019-01-08 09:15:00	4.384
2019-01-08 09:30:00	4.17
2019-01-08 09:45:00	3.943
2019-01-08 10:00:00	3.705
2019-01-08 10:15:00	3.437
2019-01-08 10:30:00	3.147
2019-01-08 10:45:00	2.876
2019-01-08 11:00:00	2.616
2019-01-08 11:15:00	2.36
2019-01-08 11:30:00	2.123
2019-01-08 11:45:00	1.906
2019-01-08 12:00:00	1.696
2019-01-08 12:15:00	1.53
2019-01-08 12:30:00	1.415
2019-01-08 12:45:00	1.3
2019-01-08 13:00:00	1.221
2019-01-08 13:15:00	1.21
2019-01-08 13:30:00	1.231
2019-01-08 13:45:00	1.322
2019-01-08 14:00:00	1.449
2019-01-08 14:15:00	1.615
2019-01-08 14:30:00	1.849
2019-01-08 14:45:00	2.111
2019-01-08 15:00:00	2.398
2019-01-08 15:15:00	2.695
2019-01-08 15:30:00	2.997
2019-01-08 15:45:00	3.28
2019-01-08 16:00:00	3.545
2019-01-08 16:15:00	3.785
2019-01-08 16:30:00	4.011
2019-01-08 16:45:00	4.196
2019-01-08 17:00:00	4.352
2019-01-08 17:15:00	4.52
2019-01-08 17:30:00	4.655
2019-01-08 17:45:00	4.769
2019-01-08 18:00:00	4.864
2019-01-08 18:15:00	4.937
2019-01-08 18:30:00	5.004
2019-01-08 18:45:00	5.07
2019-01-08 19:00:00	5.104
2019-01-08 19:15:00	5.104
2019-01-08 19:30:00	5.09
2019-01-08 19:45:00	5.05
2019-01-08 20:00:00	4.981
2019-01-08 20:15:00	4.896
2019-01-08 20:30:00	4.792
2019-01-08 20:45:00	4.683
2019-01-08 21:00:00	4.552
2019-01-08 21:15:00	4.388
2019-01-08 21:30:00	4.21
2019-01-08 21:45:00	4.012
2019-01-08 22:00:00	3.791
2019-01-08 22:15:00	3.553
2019-01-08 22:30:00	3.301
2019-01-08 22:45:00	3.03
2019-01-08 23:00:00	2.754
2019-01-08 23:15:00	2.488
2019-01-08 23:30:00	2.228
2019-01-08 23:45:00	2.002
2019-01-09	1.795
2019-01-09 00:15:00	1.628
2019-01-09 00:30:00	1.463
2019-01-09 00:45:00	1.337
2019-01-09 01:00:00	1.228
2019-01-09 01:15:00	1.162
2019-01-09 01:30:00	1.141
2019-01-09 01:45:00	1.18
2019-01-09 02:00:00	1.242
2019-01-09 02:15:00	1.355
2019-01-09 02:30:00	1.519
2019-01-09 02:45:00	1.719
2019-01-09 03:00:00	1.965
2019-01-09 03:15:00	2.25
2019-01-09 03:30:00	2.554
2019-01-09 03:45:00	2.862
2019-01-09 04:00:00	3.17
2019-01-09 04:15:00	3.446
2019-01-09 04:30:00	3.698
2019-01-09 04:45:00	3.949
2019-01-09 05:00:00	4.182
2019-01-09 05:15:00	4.373
2019-01-09 05:30:00	4.538
2019-01-09 05:45:00	4.677
2019-01-09 06:00:00	4.816
2019-01-09 06:15:00	4.946
2019-01-09 06:30:00	5.067
2019-01-09 06:45:00	5.149
2019-01-09 07:00:00	5.201
2019-01-09 07:15:00	5.254
2019-01-09 07:30:00	5.265
2019-01-09 07:45:00	5.25
2019-01-09 08:00:00	5.204
2019-01-09 08:15:00	5.125
2019-01-09 08:30:00	5.032
2019-01-09 08:45:00	4.927
2019-01-09 09:00:00	4.796
2019-01-09 09:15:00	4.658
2019-01-09 09:30:00	4.505
2019-01-09 09:45:00	4.331
2019-01-09 10:00:00	4.134
2019-01-09 10:15:00	3.918
2019-01-09 10:30:00	3.679
2019-01-09 10:45:00	3.431
2019-01-09 11:00:00	3.166
2019-01-09 11:15:00	2.897
2019-01-09 11:30:00	2.629
2019-01-09 11:45:00	2.383
2019-01-09 12:00:00	2.135
2019-01-09 12:15:00	1.91
2019-01-09 12:30:00	1.719
2019-01-09 12:45:00	1.554
2019-01-09 13:00:00	1.421
2019-01-09 13:15:00	1.306
2019-01-09 13:30:00	1.228
2019-01-09 13:45:00	1.173
2019-01-09 14:00:00	1.179
2019-01-09 14:15:00	1.233
2019-01-09 14:30:00	1.323
2019-01-09 14:45:00	1.464
2019-01-09 15:00:00	1.663
2019-01-09 15:15:00	1.905
2019-01-09 15:30:00	2.171
2019-01-09 15:45:00	2.455
2019-01-09 16:00:00	2.744
2019-01-09 16:15:00	3.031
2019-01-09 16:30:00	3.307
2019-01-09 16:45:00	3.563
2019-01-09 17:00:00	3.791
2019-01-09 17:15:00	3.982
2019-01-09 17:30:00	4.148
2019-01-09 17:45:00	4.301
2019-01-09 18:00:00	4.449
2019-01-09 18:15:00	4.55
2019-01-09 18:30:00	4.64
2019-01-09 18:45:00	4.724
2019-01-09 19:00:00	4.788
2019-01-09 19:15:00	4.847
2019-01-09 19:30:00	4.89
2019-01-09 19:45:00	4.89
2019-01-09 20:00:00	4.875
2019-01-09 20:15:00	4.864
2019-01-09 20:30:00	4.797
2019-01-09 20:45:00	4.72
2019-01-09 21:00:00	4.623
2019-01-09 21:15:00	4.506
2019-01-09 21:30:00	4.377
2019-01-09 21:45:00	4.232
2019-01-09 22:00:00	4.066
2019-01-09 22:15:00	3.867
2019-01-09 22:30:00	3.661
2019-01-09 22:45:00	3.448
2019-01-09 23:00:00	3.199
2019-01-09 23:15:00	2.954
2019-01-09 23:30:00	2.704
2019-01-09 23:45:00	2.458
2019-01-10	2.218
2019-01-10 00:15:00	2.003
2019-01-10 00:30:00	1.802
2019-01-10 00:45:00	1.634
2019-01-10 01:00:00	1.483
2019-01-10 01:15:00	1.363
2019-01-10 01:30:00	1.279
2019-01-10 01:45:00	1.22
2019-01-10 02:00:00	1.178
2019-01-10 02:15:00	1.202
2019-01-10 02:30:00	1.26
2019-01-10 02:45:00	1.355
2019-01-10 03:00:00	1.519
2019-01-10 03:15:00	1.716
2019-01-10 03:30:00	1.949
2019-01-10 03:45:00	2.219
2019-01-10 04:00:00	2.517
2019-01-10 04:15:00	2.813
2019-01-10 04:30:00	3.115
2019-01-10 04:45:00	3.394
2019-01-10 05:00:00	3.648
2019-01-10 05:15:00	3.895
2019-01-10 05:30:00	4.118
2019-01-10 05:45:00	4.316
2019-01-10 06:00:00	4.479
2019-01-10 06:15:00	4.621
2019-01-10 06:30:00	4.75
2019-01-10 06:45:00	4.862
2019-01-10 07:00:00	4.962
2019-01-10 07:15:00	5.036
2019-01-10 07:30:00	5.082
2019-01-10 07:45:00	5.118
2019-01-10 08:00:00	5.14
2019-01-10 08:15:00	5.116
2019-01-10 08:30:00	5.08
2019-01-10 08:45:00	5.007
2019-01-10 09:00:00	4.93
2019-01-10 09:15:00	4.817
2019-01-10 09:30:00	4.677
2019-01-10 09:45:00	4.538
2019-01-10 10:00:00	4.391
2019-01-10 10:15:00	4.218
2019-01-10 10:30:00	4.024
2019-01-10 10:45:00	3.818
2019-01-10 11:00:00	3.581
2019-01-10 11:15:00	3.342
2019-01-10 11:30:00	3.081
2019-01-10 11:45:00	2.828
2019-01-10 12:00:00	2.571
2019-01-10 12:15:00	2.335
2019-01-10 12:30:00	2.113
2019-01-10 12:45:00	1.902
2019-01-10 13:00:00	1.71
2019-01-10 13:15:00	1.548
2019-01-10 13:30:00	1.41
2019-01-10 13:45:00	1.31
2019-01-10 14:00:00	1.259
2019-01-10 14:15:00	1.222
2019-01-10 14:30:00	1.22
2019-01-10 14:45:00	1.264
2019-01-10 15:00:00	1.345
2019-01-10 15:15:00	1.488
2019-01-10 15:30:00	1.661
2019-01-10 15:45:00	1.887
2019-01-10 16:00:00	2.14
2019-01-10 16:15:00	2.425
2019-01-10 16:30:00	2.704
2019-01-10 16:45:00	2.979
2019-01-10 17:00:00	3.231
2019-01-10 17:15:00	3.465
2019-01-10 17:30:00	3.689
2019-01-10 17:45:00	3.88
2019-01-10 18:00:00	4.05
2019-01-10 18:15:00	4.19
2019-01-10 18:30:00	4.322
2019-01-10 18:45:00	4.434
2019-01-10 19:00:00	4.544
2019-01-10 19:15:00	4.641
2019-01-10 19:30:00	4.705
2019-01-10 19:45:00	4.749
2019-01-10 20:00:00	4.795
2019-01-10 20:15:00	4.821
2019-01-10 20:30:00	4.814
2019-01-10 20:45:00	4.772
2019-01-10 21:00:00	4.717
2019-01-10 21:15:00	4.648
2019-01-10 21:30:00	4.56
2019-01-10 21:45:00	4.448
2019-01-10 22:00:00	4.317
2019-01-10 22:15:00	4.168
2019-01-10 22:30:00	4.01
2019-01-10 22:45:00	3.837
2019-01-10 23:00:00	3.643
2019-01-10 23:15:00	3.428
2019-01-10 23:30:00	3.202
2019-01-10 23:45:00	2.97
2019-01-11	2.729
2019-01-11 00:15:00	2.504
2019-01-11 00:30:00	2.285
2019-01-11 00:45:00	2.081
2019-01-11 01:00:00	1.892
2019-01-11 01:15:00	1.744
2019-01-11 01:30:00	1.613
2019-01-11 01:45:00	1.496
2019-01-11 02:00:00	1.424
2019-01-11 02:15:00	1.361
2019-01-11 02:30:00	1.331
2019-01-11 02:45:00	1.364
2019-01-11 03:00:00	1.426
2019-01-11 03:15:00	1.529
2019-01-11 03:30:00	1.676
2019-01-11 03:45:00	1.862
2019-01-11 04:00:00	2.073
2019-01-11 04:15:00	2.328
2019-01-11 04:30:00	2.603
2019-01-11 04:45:00	2.883
2019-01-11 05:00:00	3.166
2019-01-11 05:15:00	3.423
2019-01-11 05:30:00	3.658
2019-01-11 05:45:00	3.878
2019-01-11 06:00:00	4.081
2019-01-11 06:15:00	4.261
2019-01-11 06:30:00	4.412
2019-01-11 06:45:00	4.551
2019-01-11 07:00:00	4.669
2019-01-11 07:15:00	4.768
2019-01-11 07:30:00	4.86
2019-01-11 07:45:00	4.933
2019-01-11 08:00:00	4.978
2019-01-11 08:15:00	5.004
2019-01-11 08:30:00	5.023
2019-01-11 08:45:00	5.017
2019-01-11 09:00:00	4.979
2019-01-11 09:15:00	4.912
2019-01-11 09:30:00	4.832
2019-01-11 09:45:00	4.734
2019-01-11 10:00:00	4.624
2019-01-11 10:15:00	4.493
2019-01-11 10:30:00	4.343
2019-01-11 10:45:00	4.175
2019-01-11 11:00:00	4.001
2019-01-11 11:15:00	3.807
2019-01-11 11:30:00	3.587
2019-01-11 11:45:00	3.358
2019-01-11 12:00:00	3.122
2019-01-11 12:15:00	2.883
2019-01-11 12:30:00	2.653
2019-01-11 12:45:00	2.423
2019-01-11 13:00:00	2.218
2019-01-11 13:15:00	2.029
2019-01-11 13:30:00	1.86
2019-01-11 13:45:00	1.712
2019-01-11 14:00:00	1.594
2019-01-11 14:15:00	1.481
2019-01-11 14:30:00	1.407
2019-01-11 14:45:00	1.37
2019-01-11 15:00:00	1.38
2019-01-11 15:15:00	1.423
2019-01-11 15:30:00	1.514
2019-01-11 15:45:00	1.651
2019-01-11 16:00:00	1.817
2019-01-11 16:15:00	2.008
2019-01-11 16:30:00	2.22
2019-01-11 16:45:00	2.472
2019-01-11 17:00:00	2.733
2019-01-11 17:15:00	2.98
2019-01-11 17:30:00	3.212
2019-01-11 17:45:00	3.425
2019-01-11 18:00:00	3.635
2019-01-11 18:15:00	3.822
2019-01-11 18:30:00	3.979
2019-01-11 18:45:00	4.121
2019-01-11 19:00:00	4.239
2019-01-11 19:15:00	4.346
2019-01-11 19:30:00	4.433
2019-01-11 19:45:00	4.509
2019-01-11 20:00:00	4.571
2019-01-11 20:15:00	4.629
2019-01-11 20:30:00	4.661
2019-01-11 20:45:00	4.676
2019-01-11 21:00:00	4.683
2019-01-11 21:15:00	4.661
2019-01-11 21:30:00	4.606
2019-01-11 21:45:00	4.538
2019-01-11 22:00:00	4.458
2019-01-11 22:15:00	4.355
2019-01-11 22:30:00	4.225
2019-01-11 22:45:00	4.09
2019-01-11 23:00:00	3.939
2019-01-11 23:15:00	3.781
2019-01-11 23:30:00	3.622
2019-01-11 23:45:00	3.431
2019-01-12	3.237
2019-01-12 00:15:00	3.033
2019-01-12 00:30:00	2.826
2019-01-12 00:45:00	2.603
2019-01-12 01:00:00	2.399
2019-01-12 01:15:00	2.212
2019-01-12 01:30:00	2.046
2019-01-12 01:45:00	1.897
2019-01-12 02:00:00	1.784
2019-01-12 02:15:00	1.672
2019-01-12 02:30:00	1.592
2019-01-12 02:45:00	1.558
2019-01-12 03:00:00	1.535
2019-01-12 03:15:00	1.543
2019-01-12 03:30:00	1.595
2019-01-12 03:45:00	1.693
2019-01-12 04:00:00	1.812
2019-01-12 04:15:00	1.972
2019-01-12 04:30:00	2.161
2019-01-12 04:45:00	2.381
2019-01-12 05:00:00	2.635
2019-01-12 05:15:00	2.887
2019-01-12 05:30:00	3.135
2019-01-12 05:45:00	3.363
2019-01-12 06:00:00	3.589
2019-01-12 06:15:00	3.808
2019-01-12 06:30:00	3.998
2019-01-12 06:45:00	4.162
2019-01-12 07:00:00	4.31
2019-01-12 07:15:00	4.444
2019-01-12 07:30:00	4.558
2019-01-12 07:45:00	4.66
2019-01-12 08:00:00	4.772
2019-01-12 08:15:00	4.83
2019-01-12 08:30:00	4.873
2019-01-12 08:45:00	4.908
2019-01-12 09:00:00	4.901
2019-01-12 09:15:00	4.883
2019-01-12 09:30:00	4.857
2019-01-12 09:45:00	4.79
2019-01-12 10:00:00	4.716
2019-01-12 10:15:00	4.621
2019-01-12 10:30:00	4.52
2019-01-12 10:45:00	4.385
2019-01-12 11:00:00	4.264
2019-01-12 11:15:00	4.115
2019-01-12 11:30:00	3.968
2019-01-12 11:45:00	3.782
2019-01-12 12:00:00	3.578
2019-01-12 12:15:00	3.377
2019-01-12 12:30:00	3.149
2019-01-12 12:45:00	2.932
2019-01-12 13:00:00	2.728
2019-01-12 13:15:00	2.535
2019-01-12 13:30:00	2.332
2019-01-12 13:45:00	2.168
2019-01-12 14:00:00	2.001
2019-01-12 14:15:00	1.863
2019-01-12 14:30:00	1.748
2019-01-12 14:45:00	1.664
2019-01-12 15:00:00	1.617
2019-01-12 15:15:00	1.568
2019-01-12 15:30:00	1.564
2019-01-12 15:45:00	1.596
2019-01-12 16:00:00	1.645
2019-01-12 16:15:00	1.748
2019-01-12 16:30:00	1.875
2019-01-12 16:45:00	2.05
2019-01-12 17:00:00	2.257
2019-01-12 17:15:00	2.464
2019-01-12 17:30:00	2.675
2019-01-12 17:45:00	2.905
2019-01-12 18:00:00	3.135
2019-01-12 18:15:00	3.331
2019-01-12 18:30:00	3.524
2019-01-12 18:45:00	3.685
2019-01-12 19:00:00	3.862
2019-01-12 19:15:00	4.012
2019-01-12 19:30:00	4.137
2019-01-12 19:45:00	4.237
2019-01-12 20:00:00	4.327
2019-01-12 20:15:00	4.417
2019-01-12 20:30:00	4.477
2019-01-12 20:45:00	4.53
2019-01-12 21:00:00	4.567
2019-01-12 21:15:00	4.58
2019-01-12 21:30:00	4.586
2019-01-12 21:45:00	4.582
2019-01-12 22:00:00	4.563
2019-01-12 22:15:00	4.534
2019-01-12 22:30:00	4.466
2019-01-12 22:45:00	4.379
2019-01-12 23:00:00	4.277
2019-01-12 23:15:00	4.163
2019-01-12 23:30:00	4.018
2019-01-12 23:45:00	3.888
2019-01-13	3.733
2019-01-13 00:15:00	3.558
2019-01-13 00:30:00	3.378
2019-01-13 00:45:00	3.193
2019-01-13 01:00:00	3.011
2019-01-13 01:15:00	2.821
2019-01-13 01:30:00	2.644
2019-01-13 01:45:00	2.49
2019-01-13 02:00:00	2.344
2019-01-13 02:15:00	2.193
2019-01-13 02:30:00	2.06
2019-01-13 02:45:00	1.962
2019-01-13 03:00:00	1.883
2019-01-13 03:15:00	1.837
2019-01-13 03:30:00	1.828
2019-01-13 03:45:00	1.838
2019-01-13 04:00:00	1.882
2019-01-13 04:15:00	1.947
2019-01-13 04:30:00	2.062
2019-01-13 04:45:00	2.213
2019-01-13 05:00:00	2.362
2019-01-13 05:15:00	2.536
2019-01-13 05:30:00	2.75
2019-01-13 05:45:00	2.97
2019-01-13 06:00:00	3.191
2019-01-13 06:15:00	3.406
2019-01-13 06:30:00	3.601
2019-01-13 06:45:00	3.797
2019-01-13 07:00:00	3.984
2019-01-13 07:15:00	4.122
2019-01-13 07:30:00	4.256
2019-01-13 07:45:00	4.365
2019-01-13 08:00:00	4.433
2019-01-13 08:15:00	4.522
2019-01-13 08:30:00	4.615
2019-01-13 08:45:00	4.676
2019-01-13 09:00:00	4.717
2019-01-13 09:15:00	4.743
2019-01-13 09:30:00	4.762
2019-01-13 09:45:00	4.758
2019-01-13 10:00:00	4.731
2019-01-13 10:15:00	4.695
2019-01-13 10:30:00	4.64
2019-01-13 10:45:00	4.566
2019-01-13 11:00:00	4.476
2019-01-13 11:15:00	4.369
2019-01-13 11:30:00	4.254
2019-01-13 11:45:00	4.112
2019-01-13 12:00:00	3.965
2019-01-13 12:15:00	3.814
2019-01-13 12:30:00	3.646
2019-01-13 12:45:00	3.459
2019-01-13 13:00:00	3.267
2019-01-13 13:15:00	3.101
2019-01-13 13:30:00	2.881
2019-01-13 13:45:00	2.686
2019-01-13 14:00:00	2.553
2019-01-13 14:15:00	2.394
2019-01-13 14:30:00	2.241
2019-01-13 14:45:00	2.113
2019-01-13 15:00:00	2.014
2019-01-13 15:15:00	1.938
2019-01-13 15:30:00	1.866
2019-01-13 15:45:00	1.845
2019-01-13 16:00:00	1.816
2019-01-13 16:15:00	1.832
2019-01-13 16:30:00	1.899
2019-01-13 16:45:00	1.965
2019-01-13 17:00:00	2.044
2019-01-13 17:15:00	2.161
2019-01-13 17:30:00	2.329
2019-01-13 17:45:00	2.509
2019-01-13 18:00:00	2.704
2019-01-13 18:15:00	2.9
2019-01-13 18:30:00	3.103
2019-01-13 18:45:00	3.297
2019-01-13 19:00:00	3.477
2019-01-13 19:15:00	3.631
2019-01-13 19:30:00	3.776
2019-01-13 19:45:00	3.902
2019-01-13 20:00:00	4.016
2019-01-13 20:15:00	4.113
2019-01-13 20:30:00	4.201
2019-01-13 20:45:00	4.281
2019-01-13 21:00:00	4.355
2019-01-13 21:15:00	4.409
2019-01-13 21:30:00	4.458
2019-01-13 21:45:00	4.497
2019-01-13 22:00:00	4.504
2019-01-13 22:15:00	4.497
2019-01-13 22:30:00	4.483
2019-01-13 22:45:00	4.444
2019-01-13 23:00:00	4.387
2019-01-13 23:15:00	4.326
2019-01-13 23:30:00	4.237
2019-01-13 23:45:00	4.139
2019-01-14	4.042
2019-01-14 00:15:00	3.928
2019-01-14 00:30:00	3.796
2019-01-14 00:45:00	3.649
2019-01-14 01:00:00	3.503
2019-01-14 01:15:00	3.352
2019-01-14 01:30:00	3.211
2019-01-14 01:45:00	3.048
2019-01-14 02:00:00	2.873
2019-01-14 02:15:00	2.733
2019-01-14 02:30:00	2.594
2019-01-14 02:45:00	2.464
2019-01-14 03:00:00	2.353
2019-01-14 03:15:00	2.265
2019-01-14 03:30:00	2.207
2019-01-14 03:45:00	2.148
2019-01-14 04:00:00	2.121
2019-01-14 04:15:00	2.106
2019-01-14 04:30:00	2.124
2019-01-14 04:45:00	2.152
2019-01-14 05:00:00	2.219
2019-01-14 05:15:00	2.316
2019-01-14 05:30:00	2.418
2019-01-14 05:45:00	2.566
2019-01-14 06:00:00	2.727
2019-01-14 06:15:00	2.898
2019-01-14 06:30:00	3.077
2019-01-14 06:45:00	3.273
2019-01-14 07:00:00	3.455
2019-01-14 07:15:00	3.634
2019-01-14 07:30:00	3.782
2019-01-14 07:45:00	3.92
2019-01-14 08:00:00	4.049
2019-01-14 08:15:00	4.149
2019-01-14 08:30:00	4.253
2019-01-14 08:45:00	4.333
2019-01-14 09:00:00	4.408
2019-01-14 09:15:00	4.468
2019-01-14 09:30:00	4.532
2019-01-14 09:45:00	4.557
2019-01-14 10:00:00	4.583
2019-01-14 10:15:00	4.604
2019-01-14 10:30:00	4.602
2019-01-14 10:45:00	4.586
2019-01-14 11:00:00	4.55
2019-01-14 11:15:00	4.493
2019-01-14 11:30:00	4.43
2019-01-14 11:45:00	4.366
2019-01-14 12:00:00	4.274
2019-01-14 12:15:00	4.163
2019-01-14 12:30:00	4.036
2019-01-14 12:45:00	3.911
2019-01-14 13:00:00	3.781
2019-01-14 13:15:00	3.626
2019-01-14 13:30:00	3.464
2019-01-14 13:45:00	3.313
2019-01-14 14:00:00	3.134
2019-01-14 14:15:00	2.969
2019-01-14 14:30:00	2.816
2019-01-14 14:45:00	2.674
2019-01-14 15:00:00	2.545
2019-01-14 15:15:00	2.412
2019-01-14 15:30:00	2.296
2019-01-14 15:45:00	2.177
2019-01-14 16:00:00	2.098
2019-01-14 16:15:00	2.048
2019-01-14 16:30:00	1.999
2019-01-14 16:45:00	1.981
2019-01-14 17:00:00	1.998
2019-01-14 17:15:00	2.043
2019-01-14 17:30:00	2.087
2019-01-14 17:45:00	2.167
2019-01-14 18:00:00	2.271
2019-01-14 18:15:00	2.385
2019-01-14 18:30:00	2.551
2019-01-14 18:45:00	2.707
2019-01-14 19:00:00	2.86
2019-01-14 19:15:00	3.029
2019-01-14 19:30:00	3.209
2019-01-14 19:45:00	3.376
2019-01-14 20:00:00	3.542
2019-01-14 20:15:00	3.68
2019-01-14 20:30:00	3.814
2019-01-14 20:45:00	3.931
2019-01-14 21:00:00	4.029
2019-01-14 21:15:00	4.128
2019-01-14 21:30:00	4.19
2019-01-14 21:45:00	4.258
2019-01-14 22:00:00	4.323
2019-01-14 22:15:00	4.363
2019-01-14 22:30:00	4.386
2019-01-14 22:45:00	4.423
2019-01-14 23:00:00	4.43
2019-01-14 23:15:00	4.406
2019-01-14 23:30:00	4.389
2019-01-14 23:45:00	4.352
2019-01-15	4.288
2019-01-15 00:15:00	4.221
2019-01-15 00:30:00	4.14
2019-01-15 00:45:00	4.05
2019-01-15 01:00:00	3.943
2019-01-15 01:15:00	3.822
2019-01-15 01:30:00	3.699
2019-01-15 01:45:00	3.561
2019-01-15 02:00:00	3.415
2019-01-15 02:15:00	3.276
2019-01-15 02:30:00	3.118
2019-01-15 02:45:00	2.976
2019-01-15 03:00:00	2.852
2019-01-15 03:15:00	2.72
2019-01-15 03:30:00	2.602
2019-01-15 03:45:00	2.494
2019-01-15 04:00:00	2.387
2019-01-15 04:15:00	2.302
2019-01-15 04:30:00	2.226
2019-01-15 04:45:00	2.155
2019-01-15 05:00:00	2.125
2019-01-15 05:15:00	2.112
2019-01-15 05:30:00	2.127
2019-01-15 05:45:00	2.184
2019-01-15 06:00:00	2.235
2019-01-15 06:15:00	2.316
2019-01-15 06:30:00	2.421
2019-01-15 06:45:00	2.54
2019-01-15 07:00:00	2.685
2019-01-15 07:15:00	2.841
2019-01-15 07:30:00	3.009
2019-01-15 07:45:00	3.19
2019-01-15 08:00:00	3.362
2019-01-15 08:15:00	3.515
2019-01-15 08:30:00	3.668
2019-01-15 08:45:00	3.812
2019-01-15 09:00:00	3.943
2019-01-15 09:15:00	4.052
2019-01-15 09:30:00	4.14
2019-01-15 09:45:00	4.224
2019-01-15 10:00:00	4.305
2019-01-15 10:15:00	4.383
2019-01-15 10:30:00	4.441
2019-01-15 10:45:00	4.484
2019-01-15 11:00:00	4.507
2019-01-15 11:15:00	4.527
2019-01-15 11:30:00	4.535
2019-01-15 11:45:00	4.527
2019-01-15 12:00:00	4.492
2019-01-15 12:15:00	4.452
2019-01-15 12:30:00	4.405
2019-01-15 12:45:00	4.326
2019-01-15 13:00:00	4.226
2019-01-15 13:15:00	4.125
2019-01-15 13:30:00	4.009
2019-01-15 13:45:00	3.886
2019-01-15 14:00:00	3.761
2019-01-15 14:15:00	3.617
2019-01-15 14:30:00	3.462
2019-01-15 14:45:00	3.316
2019-01-15 15:00:00	3.174
2019-01-15 15:15:00	3.034
2019-01-15 15:30:00	2.897
2019-01-15 15:45:00	2.766
2019-01-15 16:00:00	2.638
2019-01-15 16:15:00	2.517
2019-01-15 16:30:00	2.412
2019-01-15 16:45:00	2.313
2019-01-15 17:00:00	2.231
2019-01-15 17:15:00	2.178
2019-01-15 17:30:00	2.148
2019-01-15 17:45:00	2.123
2019-01-15 18:00:00	2.123
2019-01-15 18:15:00	2.154
2019-01-15 18:30:00	2.198
2019-01-15 18:45:00	2.284
2019-01-15 19:00:00	2.378
2019-01-15 19:15:00	2.486
2019-01-15 19:30:00	2.629
2019-01-15 19:45:00	2.784
2019-01-15 20:00:00	2.934
2019-01-15 20:15:00	3.095
2019-01-15 20:30:00	3.255
2019-01-15 20:45:00	3.409
2019-01-15 21:00:00	3.544
2019-01-15 21:15:00	3.677
2019-01-15 21:30:00	3.802
2019-01-15 21:45:00	3.914
2019-01-15 22:00:00	4.026
2019-01-15 22:15:00	4.127
2019-01-15 22:30:00	4.193
2019-01-15 22:45:00	4.288
2019-01-15 23:00:00	4.375
2019-01-15 23:15:00	4.442
2019-01-15 23:30:00	4.473
2019-01-15 23:45:00	4.509
2019-01-16	4.542
2019-01-16 00:15:00	4.546
2019-01-16 00:30:00	4.54
2019-01-16 00:45:00	4.512
2019-01-16 01:00:00	4.461
2019-01-16 01:15:00	4.393
2019-01-16 01:30:00	4.342
2019-01-16 01:45:00	4.269
2019-01-16 02:00:00	4.175
2019-01-16 02:15:00	4.063
2019-01-16 02:30:00	3.952
2019-01-16 02:45:00	3.84
2019-01-16 03:00:00	3.715
2019-01-16 03:15:00	3.579
2019-01-16 03:30:00	3.44
2019-01-16 03:45:00	3.301
2019-01-16 04:00:00	3.168
2019-01-16 04:15:00	3.032
2019-01-16 04:30:00	2.918
2019-01-16 04:45:00	2.799
2019-01-16 05:00:00	2.686
2019-01-16 05:15:00	2.613
2019-01-16 05:30:00	2.538
2019-01-16 05:45:00	2.472
2019-01-16 06:00:00	2.441
2019-01-16 06:15:00	2.431
2019-01-16 06:30:00	2.431
2019-01-16 06:45:00	2.453
2019-01-16 07:00:00	2.498
2019-01-16 07:15:00	2.565
2019-01-16 07:30:00	2.667
2019-01-16 07:45:00	2.762
2019-01-16 08:00:00	2.873
2019-01-16 08:15:00	3.016
2019-01-16 08:30:00	3.173
2019-01-16 08:45:00	3.319
2019-01-16 09:00:00	3.474
2019-01-16 09:15:00	3.615
2019-01-16 09:30:00	3.752
2019-01-16 09:45:00	3.881
2019-01-16 10:00:00	4.011
2019-01-16 10:15:00	4.105
2019-01-16 10:30:00	4.202
2019-01-16 10:45:00	4.315
2019-01-16 11:00:00	4.408
2019-01-16 11:15:00	4.475
2019-01-16 11:30:00	4.532
2019-01-16 11:45:00	4.588
2019-01-16 12:00:00	4.614
2019-01-16 12:15:00	4.626
2019-01-16 12:30:00	4.623
2019-01-16 12:45:00	4.612
2019-01-16 13:00:00	4.584
2019-01-16 13:15:00	4.552
2019-01-16 13:30:00	4.493
2019-01-16 13:45:00	4.438
2019-01-16 14:00:00	4.364
2019-01-16 14:15:00	4.275
2019-01-16 14:30:00	4.165
2019-01-16 14:45:00	4.049
2019-01-16 15:00:00	3.919
2019-01-16 15:15:00	3.801
2019-01-16 15:30:00	3.666
2019-01-16 15:45:00	3.504
2019-01-16 16:00:00	3.368
2019-01-16 16:15:00	3.232
2019-01-16 16:30:00	3.091
2019-01-16 16:45:00	2.938
2019-01-16 17:00:00	2.793
2019-01-16 17:15:00	2.676
2019-01-16 17:30:00	2.566
2019-01-16 17:45:00	2.448
2019-01-16 18:00:00	2.347
2019-01-16 18:15:00	2.269
2019-01-16 18:30:00	2.228
2019-01-16 18:45:00	2.192
2019-01-16 19:00:00	2.176
2019-01-16 19:15:00	2.199
2019-01-16 19:30:00	2.228
2019-01-16 19:45:00	2.27
2019-01-16 20:00:00	2.354
2019-01-16 20:15:00	2.446
2019-01-16 20:30:00	2.57
2019-01-16 20:45:00	2.69
2019-01-16 21:00:00	2.852
2019-01-16 21:15:00	3.002
2019-01-16 21:30:00	3.154
2019-01-16 21:45:00	3.308
2019-01-16 22:00:00	3.476
2019-01-16 22:15:00	3.608
2019-01-16 22:30:00	3.739
2019-01-16 22:45:00	3.871
2019-01-16 23:00:00	3.991
2019-01-16 23:15:00	4.097
2019-01-16 23:30:00	4.214
2019-01-16 23:45:00	4.308
2019-01-17	4.381
2019-01-17 00:15:00	4.46
2019-01-17 00:30:00	4.53
2019-01-17 00:45:00	4.578
2019-01-17 01:00:00	4.608
2019-01-17 01:15:00	4.632
2019-01-17 01:30:00	4.643
2019-01-17 01:45:00	4.625
2019-01-17 02:00:00	4.599
2019-01-17 02:15:00	4.568
2019-01-17 02:30:00	4.518
2019-01-17 02:45:00	4.433
2019-01-17 03:00:00	4.348
2019-01-17 03:15:00	4.256
2019-01-17 03:30:00	4.14
2019-01-17 03:45:00	4.013
2019-01-17 04:00:00	3.881
2019-01-17 04:15:00	3.743
2019-01-17 04:30:00	3.596
2019-01-17 04:45:00	3.443
2019-01-17 05:00:00	3.303
2019-01-17 05:15:00	3.136
2019-01-17 05:30:00	2.977
2019-01-17 05:45:00	2.835
2019-01-17 06:00:00	2.702
2019-01-17 06:15:00	2.57
2019-01-17 06:30:00	2.485
2019-01-17 06:45:00	2.386
2019-01-17 07:00:00	2.301
2019-01-17 07:15:00	2.262
2019-01-17 07:30:00	2.238
2019-01-17 07:45:00	2.219
2019-01-17 08:00:00	2.238
2019-01-17 08:15:00	2.281
2019-01-17 08:30:00	2.335
2019-01-17 08:45:00	2.431
2019-01-17 09:00:00	2.547
2019-01-17 09:15:00	2.659
2019-01-17 09:30:00	2.808
2019-01-17 09:45:00	2.959
2019-01-17 10:00:00	3.115
2019-01-17 10:15:00	3.259
2019-01-17 10:30:00	3.434
2019-01-17 10:45:00	3.601
2019-01-17 11:00:00	3.741
2019-01-17 11:15:00	3.858
2019-01-17 11:30:00	3.969
2019-01-17 11:45:00	4.083
2019-01-17 12:00:00	4.206
2019-01-17 12:15:00	4.307
2019-01-17 12:30:00	4.363
2019-01-17 12:45:00	4.436
2019-01-17 13:00:00	4.503
2019-01-17 13:15:00	4.56
2019-01-17 13:30:00	4.595
2019-01-17 13:45:00	4.621
2019-01-17 14:00:00	4.634
2019-01-17 14:15:00	4.639
2019-01-17 14:30:00	4.634
2019-01-17 14:45:00	4.6
2019-01-17 15:00:00	4.547
2019-01-17 15:15:00	4.483
2019-01-17 15:30:00	4.424
2019-01-17 15:45:00	4.326
2019-01-17 16:00:00	4.205
2019-01-17 16:15:00	4.079
2019-01-17 16:30:00	3.941
2019-01-17 16:45:00	3.778
2019-01-17 17:00:00	3.622
2019-01-17 17:15:00	3.456
2019-01-17 17:30:00	3.274
2019-01-17 17:45:00	3.097
2019-01-17 18:00:00	2.933
2019-01-17 18:15:00	2.766
2019-01-17 18:30:00	2.596
2019-01-17 18:45:00	2.438
2019-01-17 19:00:00	2.322
2019-01-17 19:15:00	2.222
2019-01-17 19:30:00	2.132
2019-01-17 19:45:00	2.047
2019-01-17 20:00:00	1.997
2019-01-17 20:15:00	1.95
2019-01-17 20:30:00	1.969
2019-01-17 20:45:00	2.019
2019-01-17 21:00:00	2.059
2019-01-17 21:15:00	2.147
2019-01-17 21:30:00	2.284
2019-01-17 21:45:00	2.411
2019-01-17 22:00:00	2.582
2019-01-17 22:15:00	2.765
2019-01-17 22:30:00	2.955
2019-01-17 22:45:00	3.141
2019-01-17 23:00:00	3.355
2019-01-17 23:15:00	3.531
2019-01-17 23:30:00	3.707
2019-01-17 23:45:00	3.875
2019-01-18	4.043
2019-01-18 00:15:00	4.183
2019-01-18 00:30:00	4.292
2019-01-18 00:45:00	4.43
2019-01-18 01:00:00	4.532
2019-01-18 01:15:00	4.637
2019-01-18 01:30:00	4.717
2019-01-18 01:45:00	4.77
2019-01-18 02:00:00	4.821
2019-01-18 02:15:00	4.875
2019-01-18 02:30:00	4.887
2019-01-18 02:45:00	4.879
2019-01-18 03:00:00	4.862
2019-01-18 03:15:00	4.842
2019-01-18 03:30:00	4.794
2019-01-18 03:45:00	4.739
2019-01-18 04:00:00	4.652
2019-01-18 04:15:00	4.559
2019-01-18 04:30:00	4.457
2019-01-18 04:45:00	4.332
2019-01-18 05:00:00	4.183
2019-01-18 05:15:00	4.02
2019-01-18 05:30:00	3.834
2019-01-18 05:45:00	3.653
2019-01-18 06:00:00	3.46
2019-01-18 06:15:00	3.27
2019-01-18 06:30:00	3.082
2019-01-18 06:45:00	2.905
2019-01-18 07:00:00	2.721
2019-01-18 07:15:00	2.557
2019-01-18 07:30:00	2.431
2019-01-18 07:45:00	2.287
2019-01-18 08:00:00	2.172
2019-01-18 08:15:00	2.089
2019-01-18 08:30:00	2.036
2019-01-18 08:45:00	1.981
2019-01-18 09:00:00	1.96
2019-01-18 09:15:00	1.982
2019-01-18 09:30:00	2.028
2019-01-18 09:45:00	2.116
2019-01-18 10:00:00	2.213
2019-01-18 10:15:00	2.357
2019-01-18 10:30:00	2.522
2019-01-18 10:45:00	2.722
2019-01-18 11:00:00	2.932
2019-01-18 11:15:00	3.149
2019-01-18 11:30:00	3.365
2019-01-18 11:45:00	3.578
2019-01-18 12:00:00	3.792
2019-01-18 12:15:00	3.978
2019-01-18 12:30:00	4.148
2019-01-18 12:45:00	4.311
2019-01-18 13:00:00	4.455
2019-01-18 13:15:00	4.58
2019-01-18 13:30:00	4.692
2019-01-18 13:45:00	4.795
2019-01-18 14:00:00	4.882
2019-01-18 14:15:00	4.958
2019-01-18 14:30:00	5.006
2019-01-18 14:45:00	5.039
2019-01-18 15:00:00	5.071
2019-01-18 15:15:00	5.082
2019-01-18 15:30:00	5.06
2019-01-18 15:45:00	5.019
2019-01-18 16:00:00	4.962
2019-01-18 16:15:00	4.879
2019-01-18 16:30:00	4.782
2019-01-18 16:45:00	4.675
2019-01-18 17:00:00	4.537
2019-01-18 17:15:00	4.388
2019-01-18 17:30:00	4.221
2019-01-18 17:45:00	4.035
2019-01-18 18:00:00	3.83
2019-01-18 18:15:00	3.633
2019-01-18 18:30:00	3.421
2019-01-18 18:45:00	3.21
2019-01-18 19:00:00	3
2019-01-18 19:15:00	2.803
2019-01-18 19:30:00	2.608
2019-01-18 19:45:00	2.419
2019-01-18 20:00:00	2.247
2019-01-18 20:15:00	2.102
2019-01-18 20:30:00	1.971
2019-01-18 20:45:00	1.855
2019-01-18 21:00:00	1.785
2019-01-18 21:15:00	1.743
2019-01-18 21:30:00	1.723
2019-01-18 21:45:00	1.738
2019-01-18 22:00:00	1.787
2019-01-18 22:15:00	1.886
2019-01-18 22:30:00	2.011
2019-01-18 22:45:00	2.183
2019-01-18 23:00:00	2.376
2019-01-18 23:15:00	2.589
2019-01-18 23:30:00	2.82
2019-01-18 23:45:00	3.061
2019-01-19	3.3
2019-01-19 00:15:00	3.533
2019-01-19 00:30:00	3.746
2019-01-19 00:45:00	3.94
2019-01-19 01:00:00	4.126
2019-01-19 01:15:00	4.305
2019-01-19 01:30:00	4.454
2019-01-19 01:45:00	4.59
2019-01-19 02:00:00	4.727
2019-01-19 02:15:00	4.845
2019-01-19 02:30:00	4.948
2019-01-19 02:45:00	5.044
2019-01-19 03:00:00	5.115
2019-01-19 03:15:00	5.172
2019-01-19 03:30:00	5.225
2019-01-19 03:45:00	5.243
2019-01-19 04:00:00	5.221
2019-01-19 04:15:00	5.182
2019-01-19 04:30:00	5.119
2019-01-19 04:45:00	5.036
2019-01-19 05:00:00	4.932
2019-01-19 05:15:00	4.798
2019-01-19 05:30:00	4.652
2019-01-19 05:45:00	4.501
2019-01-19 06:00:00	4.332
2019-01-19 06:15:00	4.135
2019-01-19 06:30:00	3.926
2019-01-19 06:45:00	3.705
2019-01-19 07:00:00	3.482
2019-01-19 07:15:00	3.245
2019-01-19 07:30:00	3.003
2019-01-19 07:45:00	2.787
2019-01-19 08:00:00	2.576
2019-01-19 08:15:00	2.373
2019-01-19 08:30:00	2.189
2019-01-19 08:45:00	2.033
2019-01-19 09:00:00	1.89
2019-01-19 09:15:00	1.77
2019-01-19 09:30:00	1.677
2019-01-19 09:45:00	1.616
2019-01-19 10:00:00	1.585
2019-01-19 10:15:00	1.595
2019-01-19 10:30:00	1.64
2019-01-19 10:45:00	1.74
2019-01-19 11:00:00	1.885
2019-01-19 11:15:00	2.071
2019-01-19 11:30:00	2.284
2019-01-19 11:45:00	2.518
2019-01-19 12:00:00	2.768
2019-01-19 12:15:00	3.019
2019-01-19 12:30:00	3.259
2019-01-19 12:45:00	3.498
2019-01-19 13:00:00	3.727
2019-01-19 13:15:00	3.934
2019-01-19 13:30:00	4.131
2019-01-19 13:45:00	4.307
2019-01-19 14:00:00	4.466
2019-01-19 14:15:00	4.619
2019-01-19 14:30:00	4.759
2019-01-19 14:45:00	4.886
2019-01-19 15:00:00	4.986
2019-01-19 15:15:00	5.078
2019-01-19 15:30:00	5.164
2019-01-19 15:45:00	5.231
2019-01-19 16:00:00	5.273
2019-01-19 16:15:00	5.283
2019-01-19 16:30:00	5.269
2019-01-19 16:45:00	5.241
2019-01-19 17:00:00	5.183
2019-01-19 17:15:00	5.086
2019-01-19 17:30:00	4.971
2019-01-19 17:45:00	4.841
2019-01-19 18:00:00	4.687
2019-01-19 18:15:00	4.514
2019-01-19 18:30:00	4.324
2019-01-19 18:45:00	4.124
2019-01-19 19:00:00	3.905
2019-01-19 19:15:00	3.663
2019-01-19 19:30:00	3.415
2019-01-19 19:45:00	3.17
2019-01-19 20:00:00	2.925
2019-01-19 20:15:00	2.673
2019-01-19 20:30:00	2.428
2019-01-19 20:45:00	2.206
2019-01-19 21:00:00	2.007
2019-01-19 21:15:00	1.822
2019-01-19 21:30:00	1.678
2019-01-19 21:45:00	1.558
2019-01-19 22:00:00	1.474
2019-01-19 22:15:00	1.412
2019-01-19 22:30:00	1.394
2019-01-19 22:45:00	1.407
2019-01-19 23:00:00	1.465
2019-01-19 23:15:00	1.579
2019-01-19 23:30:00	1.729
2019-01-19 23:45:00	1.935
2019-01-20	2.179
2019-01-20 00:15:00	2.451
2019-01-20 00:30:00	2.732
2019-01-20 00:45:00	3.023
2019-01-20 01:00:00	3.298
2019-01-20 01:15:00	3.55
2019-01-20 01:30:00	3.806
2019-01-20 01:45:00	4.042
2019-01-20 02:00:00	4.246
2019-01-20 02:15:00	4.423
2019-01-20 02:30:00	4.602
2019-01-20 02:45:00	4.765
2019-01-20 03:00:00	4.913
2019-01-20 03:15:00	5.05
2019-01-20 03:30:00	5.165
2019-01-20 03:45:00	5.267
2019-01-20 04:00:00	5.359
2019-01-20 04:15:00	5.422
2019-01-20 04:30:00	5.454
2019-01-20 04:45:00	5.458
2019-01-20 05:00:00	5.438
2019-01-20 05:15:00	5.388
2019-01-20 05:30:00	5.309
2019-01-20 05:45:00	5.205
2019-01-20 06:00:00	5.093
2019-01-20 06:15:00	4.954
2019-01-20 06:30:00	4.791
2019-01-20 06:45:00	4.609
2019-01-20 07:00:00	4.412
2019-01-20 07:15:00	4.191
2019-01-20 07:30:00	3.951
2019-01-20 07:45:00	3.696
2019-01-20 08:00:00	3.427
2019-01-20 08:15:00	3.147
2019-01-20 08:30:00	2.854
2019-01-20 08:45:00	2.58
2019-01-20 09:00:00	2.311
2019-01-20 09:15:00	2.068
2019-01-20 09:30:00	1.849
2019-01-20 09:45:00	1.656
2019-01-20 10:00:00	1.492
2019-01-20 10:15:00	1.337
2019-01-20 10:30:00	1.232
2019-01-20 10:45:00	1.163
2019-01-20 11:00:00	1.128
2019-01-20 11:15:00	1.152
2019-01-20 11:30:00	1.221
2019-01-20 11:45:00	1.345
2019-01-20 12:00:00	1.516
2019-01-20 12:15:00	1.737
2019-01-20 12:30:00	1.994
2019-01-20 12:45:00	2.283
2019-01-20 13:00:00	2.586
2019-01-20 13:15:00	2.884
2019-01-20 13:30:00	3.161
2019-01-20 13:45:00	3.427
2019-01-20 14:00:00	3.691
2019-01-20 14:15:00	3.912
2019-01-20 14:30:00	4.11
2019-01-20 14:45:00	4.298
2019-01-20 15:00:00	4.477
2019-01-20 15:15:00	4.636
2019-01-20 15:30:00	4.79
2019-01-20 15:45:00	4.926
2019-01-20 16:00:00	5.045
2019-01-20 16:15:00	5.166
2019-01-20 16:30:00	5.26
2019-01-20 16:45:00	5.314
2019-01-20 17:00:00	5.354
2019-01-20 17:15:00	5.357
2019-01-20 17:30:00	5.334
2019-01-20 17:45:00	5.275
2019-01-20 18:00:00	5.192
2019-01-20 18:15:00	5.093
2019-01-20 18:30:00	4.968
2019-01-20 18:45:00	4.829
2019-01-20 19:00:00	4.668
2019-01-20 19:15:00	4.478
2019-01-20 19:30:00	4.264
2019-01-20 19:45:00	4.045
2019-01-20 20:00:00	3.799
2019-01-20 20:15:00	3.531
2019-01-20 20:30:00	3.245
2019-01-20 20:45:00	2.944
2019-01-20 21:00:00	2.645
2019-01-20 21:15:00	2.358
2019-01-20 21:30:00	2.08
2019-01-20 21:45:00	1.822
2019-01-20 22:00:00	1.598
2019-01-20 22:15:00	1.4
2019-01-20 22:30:00	1.23
2019-01-20 22:45:00	1.08
2019-01-20 23:00:00	0.974
2019-01-20 23:15:00	0.916
2019-01-20 23:30:00	0.889
2019-01-20 23:45:00	0.917
2019-01-21	1.013
2019-01-21 00:15:00	1.163
2019-01-21 00:30:00	1.382
2019-01-21 00:45:00	1.635
2019-01-21 01:00:00	1.925
2019-01-21 01:15:00	2.248
2019-01-21 01:30:00	2.585
2019-01-21 01:45:00	2.91
2019-01-21 02:00:00	3.221
2019-01-21 02:15:00	3.509
2019-01-21 02:30:00	3.792
2019-01-21 02:45:00	4.051
2019-01-21 03:00:00	4.274
2019-01-21 03:15:00	4.469
2019-01-21 03:30:00	4.656
2019-01-21 03:45:00	4.838
2019-01-21 04:00:00	5.003
2019-01-21 04:15:00	5.155
2019-01-21 04:30:00	5.298
2019-01-21 04:45:00	5.417
2019-01-21 05:00:00	5.504
2019-01-21 05:15:00	5.576
2019-01-21 05:30:00	5.599
2019-01-21 05:45:00	5.582
2019-01-21 06:00:00	5.55
2019-01-21 06:15:00	5.48
2019-01-21 06:30:00	5.37
2019-01-21 06:45:00	5.242
2019-01-21 07:00:00	5.119
2019-01-21 07:15:00	4.97
2019-01-21 07:30:00	4.793
2019-01-21 07:45:00	4.592
2019-01-21 08:00:00	4.364
2019-01-21 08:15:00	4.125
2019-01-21 08:30:00	3.86
2019-01-21 08:45:00	3.575
2019-01-21 09:00:00	3.258
2019-01-21 09:15:00	2.92
2019-01-21 09:30:00	2.588
2019-01-21 09:45:00	2.272
2019-01-21 10:00:00	1.985
2019-01-21 10:15:00	1.722
2019-01-21 10:30:00	1.495
2019-01-21 10:45:00	1.299
2019-01-21 11:00:00	1.119
2019-01-21 11:15:00	0.972
2019-01-21 11:30:00	0.848
2019-01-21 11:45:00	0.767
2019-01-21 12:00:00	0.757
2019-01-21 12:15:00	0.79
2019-01-21 12:30:00	0.914
2019-01-21 12:45:00	1.083
2019-01-21 13:00:00	1.303
2019-01-21 13:15:00	1.577
2019-01-21 13:30:00	1.897
2019-01-21 13:45:00	2.248
2019-01-21 14:00:00	2.583
2019-01-21 14:15:00	2.918
2019-01-21 14:30:00	3.243
2019-01-21 14:45:00	3.532
2019-01-21 15:00:00	3.798
2019-01-21 15:15:00	4.047
2019-01-21 15:30:00	4.269
2019-01-21 15:45:00	4.468
2019-01-21 16:00:00	4.666
2019-01-21 16:15:00	4.844
2019-01-21 16:30:00	4.991
2019-01-21 16:45:00	5.135
2019-01-21 17:00:00	5.279
2019-01-21 17:15:00	5.388
2019-01-21 17:30:00	5.469
2019-01-21 17:45:00	5.534
2019-01-21 18:00:00	5.57
2019-01-21 18:15:00	5.579
2019-01-21 18:30:00	5.539
2019-01-21 18:45:00	5.441
2019-01-21 19:00:00	5.343
[truncated: 33,043 more rows]

## Sheet: Shanghai
Location: Shanghai
Source:
Date Time (GMT)	Height(m)
1995-01-01	-0.65
1995-01-01 01:00:00	0.48
1995-01-01 02:00:00	1.65
1995-01-01 03:00:00	2.4
1995-01-01 04:00:00	2.64
1995-01-01 05:00:00	2.27
1995-01-01 06:00:00	1.28
1995-01-01 07:00:00	0.2
1995-01-01 08:00:00	-0.98
1995-01-01 09:00:00	-2.1
1995-01-01 10:00:00	-2.65
1995-01-01 11:00:00	-2.68
1995-01-01 12:00:00	-1.94
1995-01-01 13:00:00	-0.66
1995-01-01 14:00:00	0.68
1995-01-01 15:00:00	1.64
1995-01-01 16:00:00	2.12
1995-01-01 17:00:00	2.19
1995-01-01 18:00:00	1.64
1995-01-01 19:00:00	0.6
1995-01-01 20:00:00	-0.46
1995-01-01 21:00:00	-1.56
1995-01-01 22:00:00	-2.18
1995-01-01 23:00:00	-2.22
1995-01-02	-1.64
1995-01-02 01:00:00	-0.57
1995-01-02 02:00:00	0.76
1995-01-02 03:00:00	1.99
1995-01-02 04:00:00	2.69
1995-01-02 05:00:00	2.86
1995-01-02 06:00:00	2.37
1995-01-02 07:00:00	1.32
1995-01-02 08:00:00	0.21
1995-01-02 09:00:00	-1
1995-01-02 10:00:00	-2.09
1995-01-02 11:00:00	-2.58
1995-01-02 12:00:00	-2.5
1995-01-02 13:00:00	-1.58
1995-01-02 14:00:00	-0.21
1995-01-02 15:00:00	1.16
1995-01-02 16:00:00	2.11
1995-01-02 17:00:00	2.53
1995-01-02 18:00:00	2.5
1995-01-02 19:00:00	1.78
1995-01-02 20:00:00	0.7
1995-01-02 21:00:00	-0.45
1995-01-02 22:00:00	-1.6
1995-01-02 23:00:00	-2.14
1995-01-03	-1.99
1995-01-03 01:00:00	-1.28
1995-01-03 02:00:00	-0.21
1995-01-03 03:00:00	1.13
1995-01-03 04:00:00	2.33
1995-01-03 05:00:00	2.97
1995-01-03 06:00:00	2.94
1995-01-03 07:00:00	2.2
1995-01-03 08:00:00	1.07
1995-01-03 09:00:00	-0.13
1995-01-03 10:00:00	-1.4
1995-01-03 11:00:00	-2.32
1995-01-03 12:00:00	-2.55
1995-01-03 13:00:00	-2.24
1995-01-03 14:00:00	-1.28
1995-01-03 15:00:00	0.07
1995-01-03 16:00:00	1.38
1995-01-03 17:00:00	2.28
1995-01-03 18:00:00	2.65
1995-01-03 19:00:00	2.41
1995-01-03 20:00:00	1.51
1995-01-03 21:00:00	0.38
1995-01-03 22:00:00	-0.78
1995-01-03 23:00:00	-1.74
1995-01-04	-2.04
1995-01-04 01:00:00	-1.75
1995-01-04 02:00:00	-1
1995-01-04 03:00:00	0.06
1995-01-04 04:00:00	1.27
1995-01-04 05:00:00	2.32
1995-01-04 06:00:00	2.79
1995-01-04 07:00:00	2.67
1995-01-04 08:00:00	1.8
1995-01-04 09:00:00	0.62
1995-01-04 10:00:00	-0.6
1995-01-04 11:00:00	-1.73
1995-01-04 12:00:00	-2.32
1995-01-04 13:00:00	-2.33
1995-01-04 14:00:00	-1.74
1995-01-04 15:00:00	-0.71
1995-01-04 16:00:00	0.46
1995-01-04 17:00:00	1.49
1995-01-04 18:00:00	2.14
1995-01-04 19:00:00	2.26
1995-01-04 20:00:00	1.79
1995-01-04 21:00:00	0.81
1995-01-04 22:00:00	-0.23
1995-01-04 23:00:00	-1.28
1995-01-05	-2.03
1995-01-05 01:00:00	-2.19
1995-01-05 02:00:00	-1.78
1995-01-05 03:00:00	-0.89
1995-01-05 04:00:00	0.26
1995-01-05 05:00:00	1.39
1995-01-05 06:00:00	2.14
1995-01-05 07:00:00	2.35
1995-01-05 08:00:00	1.95
1995-01-05 09:00:00	0.99
1995-01-05 10:00:00	-0.06
1995-01-05 11:00:00	-1.2
1995-01-05 12:00:00	-2.11
1995-01-05 13:00:00	-2.51
1995-01-05 14:00:00	-2.4
1995-01-05 15:00:00	-1.7
1995-01-05 16:00:00	-0.6
1995-01-05 17:00:00	0.56
1995-01-05 18:00:00	1.47
1995-01-05 19:00:00	1.95
1995-01-05 20:00:00	1.99
1995-01-05 21:00:00	1.37
1995-01-05 22:00:00	0.38
1995-01-05 23:00:00	-0.6
1995-01-06	-1.5
1995-01-06 01:00:00	-1.92
1995-01-06 02:00:00	-1.77
1995-01-06 03:00:00	-1.16
1995-01-06 04:00:00	-0.25
1995-01-06 05:00:00	0.76
1995-01-06 06:00:00	1.64
1995-01-06 07:00:00	2.07
1995-01-06 08:00:00	2.07
1995-01-06 09:00:00	1.54
1995-01-06 10:00:00	0.57
1995-01-06 11:00:00	-0.44
1995-01-06 12:00:00	-1.44
1995-01-06 13:00:00	-2.11
1995-01-06 14:00:00	-2.26
1995-01-06 15:00:00	-1.82
1995-01-06 16:00:00	-0.93
1995-01-06 17:00:00	0.04
1995-01-06 18:00:00	0.89
1995-01-06 19:00:00	1.49
1995-01-06 20:00:00	1.76
1995-01-06 21:00:00	1.59
1995-01-06 22:00:00	0.91
1995-01-06 23:00:00	0.05
1995-01-07	-0.78
1995-01-07 01:00:00	-1.41
1995-01-07 02:00:00	-1.63
1995-01-07 03:00:00	-1.33
1995-01-07 04:00:00	-0.64
1995-01-07 05:00:00	0.2
1995-01-07 06:00:00	1.04
1995-01-07 07:00:00	1.64
1995-01-07 08:00:00	1.87
1995-01-07 09:00:00	1.76
1995-01-07 10:00:00	1.14
1995-01-07 11:00:00	0.27
1995-01-07 12:00:00	-0.58
1995-01-07 13:00:00	-1.28
1995-01-07 14:00:00	-1.64
1995-01-07 15:00:00	-1.56
1995-01-07 16:00:00	-1.04
1995-01-07 17:00:00	-0.27
1995-01-07 18:00:00	0.52
1995-01-07 19:00:00	1.17
1995-01-07 20:00:00	1.6
1995-01-07 21:00:00	1.7
1995-01-07 22:00:00	1.41
1995-01-07 23:00:00	0.75
1995-01-08	0.04
1995-01-08 01:00:00	-0.64
1995-01-08 02:00:00	-1.08
1995-01-08 03:00:00	-1.16
1995-01-08 04:00:00	-0.81
1995-01-08 05:00:00	-0.2
1995-01-08 06:00:00	0.47
1995-01-08 07:00:00	1.01
1995-01-08 08:00:00	1.35
1995-01-08 09:00:00	1.44
1995-01-08 10:00:00	1.2
1995-01-08 11:00:00	0.64
1995-01-08 12:00:00	-0.02
1995-01-08 13:00:00	-0.63
1995-01-08 14:00:00	-1.12
1995-01-08 15:00:00	-1.34
1995-01-08 16:00:00	-1.15
1995-01-08 17:00:00	-0.64
1995-01-08 18:00:00	-0.01
1995-01-08 19:00:00	0.6
1995-01-08 20:00:00	1.12
1995-01-08 21:00:00	1.5
1995-01-08 22:00:00	1.61
1995-01-08 23:00:00	1.38
1995-01-09	0.95
1995-01-09 01:00:00	0.48
1995-01-09 02:00:00	0.08
1995-01-09 03:00:00	-0.2
1995-01-09 04:00:00	-0.32
1995-01-09 05:00:00	-0.17
1995-01-09 06:00:00	0.27
1995-01-09 07:00:00	0.7
1995-01-09 08:00:00	1.09
1995-01-09 09:00:00	1.38
1995-01-09 10:00:00	1.45
1995-01-09 11:00:00	1.33
1995-01-09 12:00:00	0.98
1995-01-09 13:00:00	0.49
1995-01-09 14:00:00	-0.02
1995-01-09 15:00:00	-0.49
1995-01-09 16:00:00	-0.74
1995-01-09 17:00:00	-0.62
1995-01-09 18:00:00	-0.2
1995-01-09 19:00:00	0.23
1995-01-09 20:00:00	0.63
1995-01-09 21:00:00	0.94
1995-01-09 22:00:00	1.15
1995-01-09 23:00:00	1.22
1995-01-10	1.01
1995-01-10 01:00:00	0.56
1995-01-10 02:00:00	0.04
1995-01-10 03:00:00	-0.44
1995-01-10 04:00:00	-0.79
1995-01-10 05:00:00	-0.9
1995-01-10 06:00:00	-0.76
1995-01-10 07:00:00	-0.39
1995-01-10 08:00:00	0.02
1995-01-10 09:00:00	0.33
1995-01-10 10:00:00	0.51
1995-01-10 11:00:00	0.54
1995-01-10 12:00:00	0.51
1995-01-10 13:00:00	0.38
1995-01-10 14:00:00	0.13
1995-01-10 15:00:00	-0.26
1995-01-10 16:00:00	-0.66
1995-01-10 17:00:00	-0.86
1995-01-10 18:00:00	-0.77
1995-01-10 19:00:00	-0.43
1995-01-10 20:00:00	-0.01
1995-01-10 21:00:00	0.42
1995-01-10 22:00:00	0.81
1995-01-10 23:00:00	1.13
1995-01-11	1.31
1995-01-11 01:00:00	1.28
1995-01-11 02:00:00	0.95
1995-01-11 03:00:00	0.46
1995-01-11 04:00:00	-0.07
1995-01-11 05:00:00	-0.52
1995-01-11 06:00:00	-0.78
1995-01-11 07:00:00	-0.8
1995-01-11 08:00:00	-0.5
1995-01-11 09:00:00	-0.09
1995-01-11 10:00:00	0.3
1995-01-11 11:00:00	0.56
1995-01-11 12:00:00	0.75
1995-01-11 13:00:00	0.87
1995-01-11 14:00:00	0.82
1995-01-11 15:00:00	0.59
1995-01-11 16:00:00	0.14
1995-01-11 17:00:00	-0.31
1995-01-11 18:00:00	-0.64
1995-01-11 19:00:00	-0.73
1995-01-11 20:00:00	-0.52
1995-01-11 21:00:00	-0.12
1995-01-11 22:00:00	0.33
1995-01-11 23:00:00	0.78
1995-01-12	1.16
1995-01-12 01:00:00	1.39
1995-01-12 02:00:00	1.32
1995-01-12 03:00:00	0.93
1995-01-12 04:00:00	0.31
1995-01-12 05:00:00	-0.29
1995-01-12 06:00:00	-0.83
1995-01-12 07:00:00	-1.22
1995-01-12 08:00:00	-1.34
1995-01-12 09:00:00	-1.15
1995-01-12 10:00:00	-0.69
1995-01-12 11:00:00	-0.18
1995-01-12 12:00:00	0.24
1995-01-12 13:00:00	0.62
1995-01-12 14:00:00	0.89
1995-01-12 15:00:00	0.91
1995-01-12 16:00:00	0.69
1995-01-12 17:00:00	0.23
1995-01-12 18:00:00	-0.25
1995-01-12 19:00:00	-0.65
1995-01-12 20:00:00	-0.78
1995-01-12 21:00:00	-0.59
1995-01-12 22:00:00	-0.13
1995-01-12 23:00:00	0.39
1995-01-13	0.94
1995-01-13 01:00:00	1.45
1995-01-13 02:00:00	1.74
1995-01-13 03:00:00	1.61
1995-01-13 04:00:00	1.1
1995-01-13 05:00:00	0.39
1995-01-13 06:00:00	-0.3
1995-01-13 07:00:00	-0.91
1995-01-13 08:00:00	-1.32
1995-01-13 09:00:00	-1.36
1995-01-13 10:00:00	-1
1995-01-13 11:00:00	-0.4
1995-01-13 12:00:00	0.25
1995-01-13 13:00:00	0.82
1995-01-13 14:00:00	1.21
1995-01-13 15:00:00	1.37
1995-01-13 16:00:00	1.21
1995-01-13 17:00:00	0.73
1995-01-13 18:00:00	0.12
1995-01-13 19:00:00	-0.5
1995-01-13 20:00:00	-0.93
1995-01-13 21:00:00	-1.04
1995-01-13 22:00:00	-0.77
1995-01-13 23:00:00	-0.23
1995-01-14	0.47
1995-01-14 01:00:00	1.14
1995-01-14 02:00:00	1.63
1995-01-14 03:00:00	1.78
1995-01-14 04:00:00	1.49
1995-01-14 05:00:00	0.83
1995-01-14 06:00:00	0.05
1995-01-14 07:00:00	-0.76
1995-01-14 08:00:00	-1.45
1995-01-14 09:00:00	-1.81
1995-01-14 10:00:00	-1.67
1995-01-14 11:00:00	-1.08
1995-01-14 12:00:00	-0.27
1995-01-14 13:00:00	0.47
1995-01-14 14:00:00	1.02
1995-01-14 15:00:00	1.35
1995-01-14 16:00:00	1.38
1995-01-14 17:00:00	0.99
1995-01-14 18:00:00	0.3
1995-01-14 19:00:00	-0.47
1995-01-14 20:00:00	-1.15
1995-01-14 21:00:00	-1.52
1995-01-14 22:00:00	-1.47
1995-01-14 23:00:00	-0.97
1995-01-15	-0.16
1995-01-15 01:00:00	0.76
1995-01-15 02:00:00	1.51
1995-01-15 03:00:00	1.94
1995-01-15 04:00:00	1.99
1995-01-15 05:00:00	1.56
1995-01-15 06:00:00	0.77
1995-01-15 07:00:00	-0.12
1995-01-15 08:00:00	-1.01
1995-01-15 09:00:00	-1.7
1995-01-15 10:00:00	-1.98
1995-01-15 11:00:00	-1.68
1995-01-15 12:00:00	-0.9
1995-01-15 13:00:00	0.05
1995-01-15 14:00:00	0.9
1995-01-15 15:00:00	1.48
1995-01-15 16:00:00	1.74
1995-01-15 17:00:00	1.6
1995-01-15 18:00:00	0.98
1995-01-15 19:00:00	0.14
1995-01-15 20:00:00	-0.67
1995-01-15 21:00:00	-1.35
1995-01-15 22:00:00	-1.65
1995-01-15 23:00:00	-1.43
1995-01-16	-0.75
1995-01-16 01:00:00	0.22
1995-01-16 02:00:00	1.21
1995-01-16 03:00:00	1.93
1995-01-16 04:00:00	2.25
1995-01-16 05:00:00	2.1
1995-01-16 06:00:00	1.4
1995-01-16 07:00:00	0.47
1995-01-16 08:00:00	-0.52
1995-01-16 09:00:00	-1.44
1995-01-16 10:00:00	-2.04
1995-01-16 11:00:00	-2.11
1995-01-16 12:00:00	-1.49
1995-01-16 13:00:00	-0.5
1995-01-16 14:00:00	0.53
1995-01-16 15:00:00	1.32
1995-01-16 16:00:00	1.8
1995-01-16 17:00:00	1.94
1995-01-16 18:00:00	1.56
1995-01-16 19:00:00	0.74
1995-01-16 20:00:00	-0.15
1995-01-16 21:00:00	-1.01
1995-01-16 22:00:00	-1.59
1995-01-16 23:00:00	-1.69
1995-01-17	-1.19
1995-01-17 01:00:00	-0.31
1995-01-17 02:00:00	0.76
1995-01-17 03:00:00	1.72
1995-01-17 04:00:00	2.3
1995-01-17 05:00:00	2.44
1995-01-17 06:00:00	2.02
1995-01-17 07:00:00	1.12
1995-01-17 08:00:00	0.1
1995-01-17 09:00:00	-0.94
1995-01-17 10:00:00	-1.85
1995-01-17 11:00:00	-2.24
1995-01-17 12:00:00	-2.02
1995-01-17 13:00:00	-1.13
1995-01-17 14:00:00	-0.01
1995-01-17 15:00:00	1.05
1995-01-17 16:00:00	1.76
1995-01-17 17:00:00	2.1
1995-01-17 18:00:00	1.99
1995-01-17 19:00:00	1.29
1995-01-17 20:00:00	0.32
1995-01-17 21:00:00	-0.65
1995-01-17 22:00:00	-1.54
1995-01-17 23:00:00	-1.97
1995-01-18	-1.78
1995-01-18 01:00:00	-1
1995-01-18 02:00:00	0.08
1995-01-18 03:00:00	1.25
1995-01-18 04:00:00	2.18
1995-01-18 05:00:00	2.6
1995-01-18 06:00:00	2.5
1995-01-18 07:00:00	1.8
1995-01-18 08:00:00	0.8
1995-01-18 09:00:00	-0.33
1995-01-18 10:00:00	-1.37
1995-01-18 11:00:00	-2.09
1995-01-18 12:00:00	-2.18
1995-01-18 13:00:00	-1.64
1995-01-18 14:00:00	-0.55
1995-01-18 15:00:00	0.7
1995-01-18 16:00:00	1.76
1995-01-18 17:00:00	2.42
1995-01-18 18:00:00	2.63
1995-01-18 19:00:00	2.22
1995-01-18 20:00:00	1.27
1995-01-18 21:00:00	0.19
1995-01-18 22:00:00	-0.9
1995-01-18 23:00:00	-1.69
1995-01-19	-1.88
1995-01-19 01:00:00	-1.42
1995-01-19 02:00:00	-0.51
1995-01-19 03:00:00	0.64
1995-01-19 04:00:00	1.74
1995-01-19 05:00:00	2.39
1995-01-19 06:00:00	2.56
1995-01-19 07:00:00	2.13
1995-01-19 08:00:00	1.15
1995-01-19 09:00:00	0.06
1995-01-19 10:00:00	-1.09
1995-01-19 11:00:00	-2.11
1995-01-19 12:00:00	-2.53
1995-01-19 13:00:00	-2.29
1995-01-19 14:00:00	-1.4
1995-01-19 15:00:00	-0.19
1995-01-19 16:00:00	0.95
1995-01-19 17:00:00	1.76
1995-01-19 18:00:00	2.17
1995-01-19 19:00:00	2.12
1995-01-19 20:00:00	1.44
1995-01-19 21:00:00	0.43
1995-01-19 22:00:00	-0.63
1995-01-19 23:00:00	-1.6
1995-01-20	-2.05
1995-01-20 01:00:00	-1.91
1995-01-20 02:00:00	-1.17
1995-01-20 03:00:00	-0.1
1995-01-20 04:00:00	1.11
1995-01-20 05:00:00	2.05
1995-01-20 06:00:00	2.5
1995-01-20 07:00:00	2.45
1995-01-20 08:00:00	1.79
1995-01-20 09:00:00	0.75
1995-01-20 10:00:00	-0.3
1995-01-20 11:00:00	-1.4
1995-01-20 12:00:00	-2.16
1995-01-20 13:00:00	-2.3
1995-01-20 14:00:00	-1.75
1995-01-20 15:00:00	-0.67
1995-01-20 16:00:00	0.56
1995-01-20 17:00:00	1.55
1995-01-20 18:00:00	2.14
1995-01-20 19:00:00	2.29
1995-01-20 20:00:00	2
1995-01-20 21:00:00	1.14
1995-01-20 22:00:00	0.17
1995-01-20 23:00:00	-0.82
1995-01-21	-1.6
1995-01-21 01:00:00	-1.81
1995-01-21 02:00:00	-1.38
1995-01-21 03:00:00	-0.52
1995-01-21 04:00:00	0.6
1995-01-21 05:00:00	1.64
1995-01-21 06:00:00	2.31
1995-01-21 07:00:00	2.53
1995-01-21 08:00:00	2.26
1995-01-21 09:00:00	1.4
1995-01-21 10:00:00	0.4
1995-01-21 11:00:00	-0.66
1995-01-21 12:00:00	-1.61
1995-01-21 13:00:00	-2.07
1995-01-21 14:00:00	-1.89
1995-01-21 15:00:00	-1.13
1995-01-21 16:00:00	-0.1
1995-01-21 17:00:00	0.98
1995-01-21 18:00:00	1.79
1995-01-21 19:00:00	2.25
1995-01-21 20:00:00	2.37
1995-01-21 21:00:00	1.89
1995-01-21 22:00:00	1.01
1995-01-21 23:00:00	0.09
1995-01-22	-0.79
1995-01-22 01:00:00	-1.33
1995-01-22 02:00:00	-1.3
1995-01-22 03:00:00	-0.73
1995-01-22 04:00:00	0.13
1995-01-22 05:00:00	1.14
1995-01-22 06:00:00	2.01
1995-01-22 07:00:00	2.52
1995-01-22 08:00:00	2.61
1995-01-22 09:00:00	2.05
1995-01-22 10:00:00	1.1
1995-01-22 11:00:00	0.11
1995-01-22 12:00:00	-0.87
1995-01-22 13:00:00	-1.59
1995-01-22 14:00:00	-1.73
1995-01-22 15:00:00	-1.28
1995-01-22 16:00:00	-0.54
1995-01-22 17:00:00	0.35
1995-01-22 18:00:00	1.2
1995-01-22 19:00:00	1.92
1995-01-22 20:00:00	2.31
1995-01-22 21:00:00	2.18
1995-01-22 22:00:00	1.5
1995-01-22 23:00:00	0.61
1995-01-23	-0.28
1995-01-23 01:00:00	-1.01
1995-01-23 02:00:00	-1.36
1995-01-23 03:00:00	-1.21
1995-01-23 04:00:00	-0.62
1995-01-23 05:00:00	0.19
1995-01-23 06:00:00	1.04
1995-01-23 07:00:00	1.74
1995-01-23 08:00:00	2.12
1995-01-23 09:00:00	2.05
1995-01-23 10:00:00	1.46
1995-01-23 11:00:00	0.59
1995-01-23 12:00:00	-0.34
1995-01-23 13:00:00	-1.16
1995-01-23 14:00:00	-1.66
1995-01-23 15:00:00	-1.63
1995-01-23 16:00:00	-1.11
1995-01-23 17:00:00	-0.35
1995-01-23 18:00:00	0.43
1995-01-23 19:00:00	1.1
1995-01-23 20:00:00	1.58
1995-01-23 21:00:00	1.76
1995-01-23 22:00:00	1.55
1995-01-23 23:00:00	0.91
1995-01-24	0.14
1995-01-24 01:00:00	-0.62
1995-01-24 02:00:00	-1.25
1995-01-24 03:00:00	-1.58
1995-01-24 04:00:00	-1.37
1995-01-24 05:00:00	-0.74
1995-01-24 06:00:00	0.01
1995-01-24 07:00:00	0.65
1995-01-24 08:00:00	1.15
1995-01-24 09:00:00	1.36
1995-01-24 10:00:00	1.34
1995-01-24 11:00:00	0.83
1995-01-24 12:00:00	0.15
1995-01-24 13:00:00	-0.6
1995-01-24 14:00:00	-1.25
1995-01-24 15:00:00	-1.62
1995-01-24 16:00:00	-1.54
1995-01-24 17:00:00	-1.04
1995-01-24 18:00:00	-0.37
1995-01-24 19:00:00	0.36
1995-01-24 20:00:00	0.93
1995-01-24 21:00:00	1.35
1995-01-24 22:00:00	1.55
1995-01-24 23:00:00	1.45
1995-01-25	0.94
1995-01-25 01:00:00	0.27
1995-01-25 02:00:00	-0.36
1995-01-25 03:00:00	-0.91
1995-01-25 04:00:00	-1.19
1995-01-25 05:00:00	-1.16
1995-01-25 06:00:00	-0.73
1995-01-25 07:00:00	-0.16
1995-01-25 08:00:00	0.43
1995-01-25 09:00:00	0.88
1995-01-25 10:00:00	1.19
1995-01-25 11:00:00	1.25
1995-01-25 12:00:00	1.06
1995-01-25 13:00:00	0.62
1995-01-25 14:00:00	0.06
1995-01-25 15:00:00	-0.45
1995-01-25 16:00:00	-0.79
1995-01-25 17:00:00	-0.85
1995-01-25 18:00:00	-0.53
1995-01-25 19:00:00	-0.03
1995-01-25 20:00:00	0.57
1995-01-25 21:00:00	1.18
1995-01-25 22:00:00	1.74
1995-01-25 23:00:00	2.14
1995-01-26	2.14
1995-01-26 01:00:00	1.71
1995-01-26 02:00:00	1.02
1995-01-26 03:00:00	0.34
1995-01-26 04:00:00	-0.29
1995-01-26 05:00:00	-0.74
1995-01-26 06:00:00	-0.92
1995-01-26 07:00:00	-0.77
1995-01-26 08:00:00	-0.33
1995-01-26 09:00:00	0.24
1995-01-26 10:00:00	0.75
1995-01-26 11:00:00	1.12
1995-01-26 12:00:00	1.33
1995-01-26 13:00:00	1.25
1995-01-26 14:00:00	0.89
1995-01-26 15:00:00	0.3
1995-01-26 16:00:00	-0.35
1995-01-26 17:00:00	-0.88
1995-01-26 18:00:00	-1.13
1995-01-26 19:00:00	-1.06
1995-01-26 20:00:00	-0.59
1995-01-26 21:00:00	-0.06
1995-01-26 22:00:00	0.57
1995-01-26 23:00:00	1.05
1995-01-27	1.52
1995-01-27 01:00:00	1.74
1995-01-27 02:00:00	1.57
1995-01-27 03:00:00	0.99
1995-01-27 04:00:00	0.2
1995-01-27 05:00:00	-0.54
1995-01-27 06:00:00	-1.15
1995-01-27 07:00:00	-1.51
1995-01-27 08:00:00	-1.5
1995-01-27 09:00:00	-1.04
1995-01-27 10:00:00	-0.35
1995-01-27 11:00:00	0.32
1995-01-27 12:00:00	0.83
1995-01-27 13:00:00	1.19
1995-01-27 14:00:00	1.37
1995-01-27 15:00:00	1.21
1995-01-27 16:00:00	0.72
1995-01-27 17:00:00	0.03
1995-01-27 18:00:00	-0.65
1995-01-27 19:00:00	-1.14
1995-01-27 20:00:00	-1.26
1995-01-27 21:00:00	-0.87
1995-01-27 22:00:00	-0.26
1995-01-27 23:00:00	0.49
1995-01-28	1.21
1995-01-28 01:00:00	1.78
1995-01-28 02:00:00	2.07
1995-01-28 03:00:00	1.98
1995-01-28 04:00:00	1.33
1995-01-28 05:00:00	0.5
1995-01-28 06:00:00	-0.34
1995-01-28 07:00:00	-1.14
1995-01-28 08:00:00	-1.71
1995-01-28 09:00:00	-1.85
1995-01-28 10:00:00	-1.37
1995-01-28 11:00:00	-0.57
1995-01-28 12:00:00	0.3
1995-01-28 13:00:00	1.02
1995-01-28 14:00:00	1.54
1995-01-28 15:00:00	1.78
1995-01-28 16:00:00	1.58
1995-01-28 17:00:00	0.89
1995-01-28 18:00:00	0.05
1995-01-28 19:00:00	-0.77
1995-01-28 20:00:00	-1.37
1995-01-28 21:00:00	-1.54
1995-01-28 22:00:00	-1.19
1995-01-28 23:00:00	-0.48
1995-01-29	0.47
1995-01-29 01:00:00	1.4
1995-01-29 02:00:00	2.08
1995-01-29 03:00:00	2.39
1995-01-29 04:00:00	2.19
1995-01-29 05:00:00	1.41
1995-01-29 06:00:00	0.47
1995-01-29 07:00:00	-0.51
1995-01-29 08:00:00	-1.42
1995-01-29 09:00:00	-2.03
1995-01-29 10:00:00	-2.13
1995-01-29 11:00:00	-1.54
1995-01-29 12:00:00	-0.55
1995-01-29 13:00:00	0.54
1995-01-29 14:00:00	1.37
1995-01-29 15:00:00	1.91
1995-01-29 16:00:00	2.1
1995-01-29 17:00:00	1.75
1995-01-29 18:00:00	0.89
1995-01-29 19:00:00	-0.07
1995-01-29 20:00:00	-1.01
1995-01-29 21:00:00	-1.68
1995-01-29 22:00:00	-1.85
1995-01-29 23:00:00	-1.42
1995-01-30	-0.57
1995-01-30 01:00:00	0.56
1995-01-30 02:00:00	1.59
1995-01-30 03:00:00	2.3
1995-01-30 04:00:00	2.57
1995-01-30 05:00:00	2.25
1995-01-30 06:00:00	1.33
1995-01-30 07:00:00	0.26
1995-01-30 08:00:00	-0.88
1995-01-30 09:00:00	-1.88
1995-01-30 10:00:00	-2.43
1995-01-30 11:00:00	-2.39
1995-01-30 12:00:00	-1.59
1995-01-30 13:00:00	-0.37
1995-01-30 14:00:00	0.83
1995-01-30 15:00:00	1.69
1995-01-30 16:00:00	2.15
1995-01-30 17:00:00	2.21
1995-01-30 18:00:00	1.64
1995-01-30 19:00:00	0.62
1995-01-30 20:00:00	-0.43
1995-01-30 21:00:00	-1.47
1995-01-30 22:00:00	-2.06
1995-01-30 23:00:00	-2.06
1995-01-31	-1.45
1995-01-31 01:00:00	-0.41
1995-01-31 02:00:00	0.83
1995-01-31 03:00:00	1.94
1995-01-31 04:00:00	2.59
1995-01-31 05:00:00	2.72
1995-01-31 06:00:00	2.21
1995-01-31 07:00:00	1.14
1995-01-31 08:00:00	0.07
1995-01-31 09:00:00	-1.07
1995-01-31 10:00:00	-1.98
1995-01-31 11:00:00	-2.36
1995-01-31 12:00:00	-2.08
1995-01-31 13:00:00	-1.13
1995-01-31 14:00:00	0.19
1995-01-31 15:00:00	1.53
1995-01-31 16:00:00	2.4
1995-01-31 17:00:00	2.78
1995-01-31 18:00:00	2.56
1995-01-31 19:00:00	1.62
1995-01-31 20:00:00	0.49
1995-01-31 21:00:00	-0.71
1995-01-31 22:00:00	-1.75
1995-01-31 23:00:00	-2.14
1995-02-01	-1.88
1995-02-01 01:00:00	-1.07
1995-02-01 02:00:00	0.1
1995-02-01 03:00:00	1.38
1995-02-01 04:00:00	2.38
1995-02-01 05:00:00	2.88
1995-02-01 06:00:00	2.69
1995-02-01 07:00:00	1.81
1995-02-01 08:00:00	0.63
1995-02-01 09:00:00	-0.55
1995-02-01 10:00:00	-1.77
1995-02-01 11:00:00	-2.49
1995-02-01 12:00:00	-2.64
1995-02-01 13:00:00	-2.1
1995-02-01 14:00:00	-0.86
1995-02-01 15:00:00	0.58
1995-02-01 16:00:00	1.73
1995-02-01 17:00:00	2.34
1995-02-01 18:00:00	2.49
1995-02-01 19:00:00	1.99
1995-02-01 20:00:00	0.93
1995-02-01 21:00:00	-0.21
1995-02-01 22:00:00	-1.4
1995-02-01 23:00:00	-2.22
1995-02-02	-2.39
1995-02-02 01:00:00	-1.9
1995-02-02 02:00:00	-0.87
1995-02-02 03:00:00	0.45
1995-02-02 04:00:00	1.73
1995-02-02 05:00:00	2.55
1995-02-02 06:00:00	2.81
1995-02-02 07:00:00	2.42
1995-02-02 08:00:00	1.36
1995-02-02 09:00:00	0.2
1995-02-02 10:00:00	-1
1995-02-02 11:00:00	-2.02
1995-02-02 12:00:00	-2.43
1995-02-02 13:00:00	-2.3
1995-02-02 14:00:00	-1.42
1995-02-02 15:00:00	-0.16
1995-02-02 16:00:00	1.17
1995-02-02 17:00:00	2.13
1995-02-02 18:00:00	2.55
1995-02-02 19:00:00	2.48
1995-02-02 20:00:00	1.75
1995-02-02 21:00:00	0.67
1995-02-02 22:00:00	-0.42
1995-02-02 23:00:00	-1.46
1995-02-03	-2.04
1995-02-03 01:00:00	-1.96
1995-02-03 02:00:00	-1.23
1995-02-03 03:00:00	-0.11
1995-02-03 04:00:00	1.14
1995-02-03 05:00:00	2.16
1995-02-03 06:00:00	2.66
1995-02-03 07:00:00	2.64
1995-02-03 08:00:00	1.98
1995-02-03 09:00:00	0.89
1995-02-03 10:00:00	-0.24
1995-02-03 11:00:00	-1.37
1995-02-03 12:00:00	-2.18
1995-02-03 13:00:00	-2.36
1995-02-03 14:00:00	-1.85
1995-02-03 15:00:00	-0.83
1995-02-03 16:00:00	0.4
1995-02-03 17:00:00	1.47
1995-02-03 18:00:00	2.16
1995-02-03 19:00:00	2.38
1995-02-03 20:00:00	2.06
1995-02-03 21:00:00	1.16
1995-02-03 22:00:00	0.13
1995-02-03 23:00:00	-0.96
1995-02-04	-1.79
1995-02-04 01:00:00	-2.08
1995-02-04 02:00:00	-1.73
1995-02-04 03:00:00	-0.86
1995-02-04 04:00:00	0.28
1995-02-04 05:00:00	1.38
1995-02-04 06:00:00	2.06
1995-02-04 07:00:00	2.3
1995-02-04 08:00:00	2.05
1995-02-04 09:00:00	1.22
1995-02-04 10:00:00	0.21
1995-02-04 11:00:00	-0.89
1995-02-04 12:00:00	-1.77
1995-02-04 13:00:00	-2
1995-02-04 14:00:00	-1.76
1995-02-04 15:00:00	-1.16
1995-02-04 16:00:00	-0.28
1995-02-04 17:00:00	0.78
1995-02-04 18:00:00	1.68
1995-02-04 19:00:00	2.08
1995-02-04 20:00:00	2.05
1995-02-04 21:00:00	1.45
1995-02-04 22:00:00	0.53
1995-02-04 23:00:00	-0.41
1995-02-05	-1.23
1995-02-05 01:00:00	-1.65
1995-02-05 02:00:00	-1.62
1995-02-05 03:00:00	-1.1
1995-02-05 04:00:00	-0.28
1995-02-05 05:00:00	0.66
1995-02-05 06:00:00	1.48
1995-02-05 07:00:00	1.89
1995-02-05 08:00:00	1.91
1995-02-05 09:00:00	1.46
1995-02-05 10:00:00	0.61
1995-02-05 11:00:00	-0.29
1995-02-05 12:00:00	-1.16
1995-02-05 13:00:00	-1.73
1995-02-05 14:00:00	-1.83
1995-02-05 15:00:00	-1.43
1995-02-05 16:00:00	-0.67
1995-02-05 17:00:00	0.21
1995-02-05 18:00:00	1.02
1995-02-05 19:00:00	1.57
1995-02-05 20:00:00	1.75
1995-02-05 21:00:00	1.54
1995-02-05 22:00:00	0.85
1995-02-05 23:00:00	0.02
1995-02-06	-0.81
1995-02-06 01:00:00	-1.42
1995-02-06 02:00:00	-1.63
1995-02-06 03:00:00	-1.38
1995-02-06 04:00:00	-0.75
1995-02-06 05:00:00	0.05
1995-02-06 06:00:00	0.77
1995-02-06 07:00:00	1.27
1995-02-06 08:00:00	1.45
1995-02-06 09:00:00	1.3
1995-02-06 10:00:00	0.75
1995-02-06 11:00:00	0.02
1995-02-06 12:00:00	-0.67
1995-02-06 13:00:00	-1.25
1995-02-06 14:00:00	-1.52
1995-02-06 15:00:00	-1.37
1995-02-06 16:00:00	-0.82
1995-02-06 17:00:00	-0.07
1995-02-06 18:00:00	0.67
1995-02-06 19:00:00	1.24
1995-02-06 20:00:00	1.54
1995-02-06 21:00:00	1.58
1995-02-06 22:00:00	1.24
1995-02-06 23:00:00	0.61
1995-02-07	-0.04
1995-02-07 01:00:00	-0.62
1995-02-07 02:00:00	-1.01
1995-02-07 03:00:00	-1.09
1995-02-07 04:00:00	-0.79
1995-02-07 05:00:00	-0.24
1995-02-07 06:00:00	0.36
1995-02-07 07:00:00	0.83
1995-02-07 08:00:00	1.09
1995-02-07 09:00:00	1.15
1995-02-07 10:00:00	0.91
1995-02-07 11:00:00	0.47
1995-02-07 12:00:00	-0.04
1995-02-07 13:00:00	-0.52
1995-02-07 14:00:00	-0.86
1995-02-07 15:00:00	-0.98
1995-02-07 16:00:00	-0.79
1995-02-07 17:00:00	-0.29
1995-02-07 18:00:00	0.27
1995-02-07 19:00:00	0.73
1995-02-07 20:00:00	1.07
1995-02-07 21:00:00	1.29
1995-02-07 22:00:00	1.31
1995-02-07 23:00:00	1.02
1995-02-08	0.56
1995-02-08 01:00:00	0.07
1995-02-08 02:00:00	-0.37
1995-02-08 03:00:00	-0.66
1995-02-08 04:00:00	-0.75
1995-02-08 05:00:00	-0.52
1995-02-08 06:00:00	-0.12
1995-02-08 07:00:00	0.26
1995-02-08 08:00:00	0.58
1995-02-08 09:00:00	0.79
1995-02-08 10:00:00	0.83
1995-02-08 11:00:00	0.74
1995-02-08 12:00:00	0.52
1995-02-08 13:00:00	0.26
1995-02-08 14:00:00	-0.03
1995-02-08 15:00:00	-0.3
1995-02-08 16:00:00	-0.41
1995-02-08 17:00:00	-0.31
1995-02-08 18:00:00	0.01
1995-02-08 19:00:00	0.38
1995-02-08 20:00:00	0.67
1995-02-08 21:00:00	0.97
1995-02-08 22:00:00	1.19
1995-02-08 23:00:00	1.29
1995-02-09	1.17
1995-02-09 01:00:00	0.83
1995-02-09 02:00:00	0.38
1995-02-09 03:00:00	-0.04
1995-02-09 04:00:00	-0.33
1995-02-09 05:00:00	-0.42
1995-02-09 06:00:00	-0.31
1995-02-09 07:00:00	-0.12
1995-02-09 08:00:00	0.1
1995-02-09 09:00:00	0.33
1995-02-09 10:00:00	0.56
1995-02-09 11:00:00	0.78
1995-02-09 12:00:00	0.93
1995-02-09 13:00:00	0.95
1995-02-09 14:00:00	0.8
1995-02-09 15:00:00	0.48
1995-02-09 16:00:00	0.18
1995-02-09 17:00:00	-0.01
1995-02-09 18:00:00	-0.08
1995-02-09 19:00:00	-0.027
1995-02-09 20:00:00	0.14
1995-02-09 21:00:00	0.4
1995-02-09 22:00:00	0.72
1995-02-09 23:00:00	1.03
1995-02-10	1.23
1995-02-10 01:00:00	1.29
1995-02-10 02:00:00	1.05
1995-02-10 03:00:00	0.6
1995-02-10 04:00:00	0.05
1995-02-10 05:00:00	-0.41
1995-02-10 06:00:00	-0.69
1995-02-10 07:00:00	-0.76
1995-02-10 08:00:00	-0.67
1995-02-10 09:00:00	-0.46
1995-02-10 10:00:00	-0.13
1995-02-10 11:00:00	0.23
1995-02-10 12:00:00	0.57
1995-02-10 13:00:00	0.83
1995-02-10 14:00:00	0.95
1995-02-10 15:00:00	0.84
1995-02-10 16:00:00	0.48
1995-02-10 17:00:00	0.02
1995-02-10 18:00:00	-0.35
1995-02-10 19:00:00	-0.55
1995-02-10 20:00:00	-0.55
1995-02-10 21:00:00	-0.28
1995-02-10 22:00:00	0.16
1995-02-10 23:00:00	0.63
1995-02-11	1.06
1995-02-11 01:00:00	1.4
1995-02-11 02:00:00	1.5
1995-02-11 03:00:00	1.27
1995-02-11 04:00:00	0.75
1995-02-11 05:00:00	0.12
1995-02-11 06:00:00	-0.45
1995-02-11 07:00:00	-0.87
1995-02-11 08:00:00	-1.06
1995-02-11 09:00:00	-0.92
1995-02-11 10:00:00	-0.47
1995-02-11 11:00:00	0.08
1995-02-11 12:00:00	0.61
1995-02-11 13:00:00	1.07
1995-02-11 14:00:00	1.42
1995-02-11 15:00:00	1.51
1995-02-11 16:00:00	1.27
1995-02-11 17:00:00	0.74
1995-02-11 18:00:00	0.15
1995-02-11 19:00:00	-0.34
1995-02-11 20:00:00	-0.65
1995-02-11 21:00:00	-0.65
1995-02-11 22:00:00	-0.28
1995-02-11 23:00:00	0.3
1995-02-12	0.94
1995-02-12 01:00:00	1.49
1995-02-12 02:00:00	1.86
1995-02-12 03:00:00	1.95
1995-02-12 04:00:00	1.56
1995-02-12 05:00:00	0.85
1995-02-12 06:00:00	0.06
1995-02-12 07:00:00	-0.67
1995-02-12 08:00:00	-1.23
1995-02-12 09:00:00	-1.41
1995-02-12 10:00:00	-1.11
1995-02-12 11:00:00	-0.5
1995-02-12 12:00:00	0.21
1995-02-12 13:00:00	0.86
1995-02-12 14:00:00	1.39
1995-02-12 15:00:00	1.76
1995-02-12 16:00:00	1.73
1995-02-12 17:00:00	1.25
1995-02-12 18:00:00	0.47
1995-02-12 19:00:00	-0.26
1995-02-12 20:00:00	-0.85
1995-02-12 21:00:00	-1.07
1995-02-12 22:00:00	-0.89
1995-02-12 23:00:00	-0.34
1995-02-13	0.44
1995-02-13 01:00:00	1.23
1995-02-13 02:00:00	1.79
1995-02-13 03:00:00	2.09
1995-02-13 04:00:00	2
1995-02-13 05:00:00	1.45
1995-02-13 06:00:00	0.59
1995-02-13 07:00:00	-0.26
1995-02-13 08:00:00	-1.11
1995-02-13 09:00:00	-1.65
1995-02-13 10:00:00	-1.68
1995-02-13 11:00:00	-1.12
1995-02-13 12:00:00	-0.29
1995-02-13 13:00:00	0.59
1995-02-13 14:00:00	1.3
1995-02-13 15:00:00	1.77
1995-02-13 16:00:00	1.95
1995-02-13 17:00:00	1.62
1995-02-13 18:00:00	0.85
1995-02-13 19:00:00	-0.007
1995-02-13 20:00:00	-0.87
1995-02-13 21:00:00	-1.48
1995-02-13 22:00:00	-1.56
1995-02-13 23:00:00	-1.09
1995-02-14	-0.28
1995-02-14 01:00:00	0.68
1995-02-14 02:00:00	1.51
1995-02-14 03:00:00	2.06
1995-02-14 04:00:00	2.21
1995-02-14 05:00:00	1.89
1995-02-14 06:00:00	1.08
1995-02-14 07:00:00	0.12
1995-02-14 08:00:00	-0.9
1995-02-14 09:00:00	-1.76
1995-02-14 10:00:00	-2.16
1995-02-14 11:00:00	-1.98
1995-02-14 12:00:00	-1.17
1995-02-14 13:00:00	-0.12
1995-02-14 14:00:00	0.91
1995-02-14 15:00:00	1.65
1995-02-14 16:00:00	2.06
1995-02-14 17:00:00	2.03
1995-02-14 18:00:00	1.43
1995-02-14 19:00:00	0.5
1995-02-14 20:00:00	-0.45
1995-02-14 21:00:00	-1.31
1995-02-14 22:00:00	-1.77
1995-02-14 23:00:00	-1.69
1995-02-15	-1.02
1995-02-15 01:00:00	-0.02
1995-02-15 02:00:00	1.14
1995-02-15 03:00:00	2.05
1995-02-15 04:00:00	2.49
1995-02-15 05:00:00	2.47
1995-02-15 06:00:00	1.84
1995-02-15 07:00:00	0.8
1995-02-15 08:00:00	-0.26
1995-02-15 09:00:00	-1.31
1995-02-15 10:00:00	-2.07
1995-02-15 11:00:00	-2.25
1995-02-15 12:00:00	-1.76
1995-02-15 13:00:00	-0.73
1995-02-15 14:00:00	0.45
1995-02-15 15:00:00	1.43
1995-02-15 16:00:00	2.08
1995-02-15 17:00:00	2.28
1995-02-15 18:00:00	1.96
1995-02-15 19:00:00	1.07
1995-02-15 20:00:00	0.05
1995-02-15 21:00:00	-0.98
1995-02-15 22:00:00	-1.78
1995-02-15 23:00:00	-2.03
1995-02-16	-1.61
1995-02-16 01:00:00	-0.73
1995-02-16 02:00:00	0.46
1995-02-16 03:00:00	1.64
1995-02-16 04:00:00	2.48
1995-02-16 05:00:00	2.81
1995-02-16 06:00:00	2.53
1995-02-16 07:00:00	1.61
1995-02-16 08:00:00	0.5
1995-02-16 09:00:00	-0.66
1995-02-16 10:00:00	-1.73
1995-02-16 11:00:00	-2.27
1995-02-16 12:00:00	-2.15
1995-02-16 13:00:00	-1.34
1995-02-16 14:00:00	-0.17
1995-02-16 15:00:00	1.1
1995-02-16 16:00:00	2.03
1995-02-16 17:00:00	2.46
1995-02-16 18:00:00	2.41
1995-02-16 19:00:00	1.74
1995-02-16 20:00:00	0.67
1995-02-16 21:00:00	-0.43
1995-02-16 22:00:00	-1.51
1995-02-16 23:00:00	-2.13
1995-02-17	-2.14
1995-02-17 01:00:00	-1.48
1995-02-17 02:00:00	-0.39
1995-02-17 03:00:00	0.91
1995-02-17 04:00:00	2
1995-02-17 05:00:00	2.54
1995-02-17 06:00:00	2.57
1995-02-17 07:00:00	1.98
1995-02-17 08:00:00	0.91
1995-02-17 09:00:00	-0.2
1995-02-17 10:00:00	-1.42
1995-02-17 11:00:00	-2.35
1995-02-17 12:00:00	-2.59
1995-02-17 13:00:00	-2.14
1995-02-17 14:00:00	-1.02
1995-02-17 15:00:00	0.38
1995-02-17 16:00:00	1.57
1995-02-17 17:00:00	2.27
1995-02-17 18:00:00	2.47
1995-02-17 19:00:00	2.19
1995-02-17 20:00:00	1.29
1995-02-17 21:00:00	0.23
1995-02-17 22:00:00	-0.89
1995-02-17 23:00:00	-1.87
1995-02-18	-2.22
1995-02-18 01:00:00	-1.87
1995-02-18 02:00:00	-0.93
1995-02-18 03:00:00	0.29
1995-02-18 04:00:00	1.62
1995-02-18 05:00:00	2.53
1995-02-18 06:00:00	2.83
1995-02-18 07:00:00	2.58
1995-02-18 08:00:00	1.73
1995-02-18 09:00:00	0.62
1995-02-18 10:00:00	-0.53
1995-02-18 11:00:00	-1.63
1995-02-18 12:00:00	-2.17
1995-02-18 13:00:00	-2.11
1995-02-18 14:00:00	-1.3
1995-02-18 15:00:00	-0.08
1995-02-18 16:00:00	1.23
1995-02-18 17:00:00	2.22
1995-02-18 18:00:00	2.73
1995-02-18 19:00:00	2.75
1995-02-18 20:00:00	2.14
1995-02-18 21:00:00	1.08
1995-02-18 22:00:00	-0.03
1995-02-18 23:00:00	-1.17
1995-02-19	-1.9
1995-02-19 01:00:00	-1.92
1995-02-19 02:00:00	-1.29
1995-02-19 03:00:00	-0.25
1995-02-19 04:00:00	1.02
1995-02-19 05:00:00	2.07
1995-02-19 06:00:00	2.65
1995-02-19 07:00:00	2.76
1995-02-19 08:00:00	2.27
1995-02-19 09:00:00	1.23
1995-02-19 10:00:00	0.1
1995-02-19 11:00:00	-1.05
1995-02-19 12:00:00	-1.94
1995-02-19 13:00:00	-2.18
1995-02-19 14:00:00	-1.69
1995-02-19 15:00:00	-0.68
1995-02-19 16:00:00	0.54
1995-02-19 17:00:00	1.61
1995-02-19 18:00:00	2.34
1995-02-19 19:00:00	2.64
1995-02-19 20:00:00	2.46
1995-02-19 21:00:00	1.62
1995-02-19 22:00:00	0.58
1995-02-19 23:00:00	-0.48
1995-02-20	-1.42
1995-02-20 01:00:00	-1.83
1995-02-20 02:00:00	-1.6
1995-02-20 03:00:00	-0.84
1995-02-20 04:00:00	0.21
1995-02-20 05:00:00	1.3
1995-02-20 06:00:00	2.16
1995-02-20 07:00:00	2.57
1995-02-20 08:00:00	2.56
1995-02-20 09:00:00	1.81
1995-02-20 10:00:00	0.78
1995-02-20 11:00:00	-0.26
1995-02-20 12:00:00	-1.19
1995-02-20 13:00:00	-1.75
1995-02-20 14:00:00	-1.71
1995-02-20 15:00:00	-1.06
1995-02-20 16:00:00	-0.06
1995-02-20 17:00:00	1
1995-02-20 18:00:00	1.91
1995-02-20 19:00:00	2.42
1995-02-20 20:00:00	2.5
1995-02-20 21:00:00	2.03
1995-02-20 22:00:00	1.08
1995-02-20 23:00:00	0.07
1995-02-21	-0.9
1995-02-21 01:00:00	-1.63
1995-02-21 02:00:00	-1.85
1995-02-21 03:00:00	-1.41
1995-02-21 04:00:00	-0.54
1995-02-21 05:00:00	0.45
1995-02-21 06:00:00	1.32
1995-02-21 07:00:00	1.87
1995-02-21 08:00:00	2.03
1995-02-21 09:00:00	1.79
1995-02-21 10:00:00	1.07
1995-02-21 11:00:00	0.18
1995-02-21 12:00:00	-0.75
1995-02-21 13:00:00	-1.56
1995-02-21 14:00:00	-1.93
1995-02-21 15:00:00	-1.68
1995-02-21 16:00:00	-0.89
1995-02-21 17:00:00	0.08
1995-02-21 18:00:00	1
1995-02-21 19:00:00	1.66
1995-02-21 20:00:00	1.98
1995-02-21 21:00:00	1.98
1995-02-21 22:00:00	1.48
1995-02-21 23:00:00	0.66
1995-02-22	-0.11
1995-02-22 01:00:00	-0.84
1995-02-22 02:00:00	-1.35
1995-02-22 03:00:00	-1.51
1995-02-22 04:00:00	-1.11
1995-02-22 05:00:00	-0.36
1995-02-22 06:00:00	0.47
1995-02-22 07:00:00	1.1
1995-02-22 08:00:00	1.54
1995-02-22 09:00:00	1.67
1995-02-22 10:00:00	1.47
1995-02-22 11:00:00	0.88
1995-02-22 12:00:00	0.22
1995-02-22 13:00:00	-0.43
1995-02-22 14:00:00	-0.93
1995-02-22 15:00:00	-1.15
1995-02-22 16:00:00	-0.93
1995-02-22 17:00:00	-0.33
1995-02-22 18:00:00	0.41
1995-02-22 19:00:00	1.03
1995-02-22 20:00:00	1.52
1995-02-22 21:00:00	1.82
1995-02-22 22:00:00	1.9
1995-02-22 23:00:00	1.58
1995-02-23	0.96
1995-02-23 01:00:00	0.28
1995-02-23 02:00:00	-0.34
1995-02-23 03:00:00	-0.83
1995-02-23 04:00:00	-1
1995-02-23 05:00:00	-0.78
1995-02-23 06:00:00	-0.29
1995-02-23 07:00:00	0.25
1995-02-23 08:00:00	0.72
1995-02-23 09:00:00	1.07
1995-02-23 10:00:00	1.28
1995-02-23 11:00:00	1.3
1995-02-23 12:00:00	1.03
1995-02-23 13:00:00	0.57
1995-02-23 14:00:00	0.01
1995-02-23 15:00:00	-0.48
1995-02-23 16:00:00	-0.8
1995-02-23 17:00:00	-0.76
1995-02-23 18:00:00	-0.38
1995-02-23 19:00:00	0.13
1995-02-23 20:00:00	0.6
1995-02-23 21:00:00	0.99
1995-02-23 22:00:00	1.33
1995-02-23 23:00:00	1.53
1995-02-24	1.5
1995-02-24 01:00:00	1.11
1995-02-24 02:00:00	0.49
1995-02-24 03:00:00	-0.11
1995-02-24 04:00:00	-0.66
1995-02-24 05:00:00	-1
1995-02-24 06:00:00	-1.05
1995-02-24 07:00:00	-0.77
1995-02-24 08:00:00	-0.38
1995-02-24 09:00:00	0.09
1995-02-24 10:00:00	0.51
1995-02-24 11:00:00	0.89
1995-02-24 12:00:00	1.17
1995-02-24 13:00:00	1.19
1995-02-24 14:00:00	0.92
1995-02-24 15:00:00	0.41
1995-02-24 16:00:00	-0.13
1995-02-24 17:00:00	-0.56
1995-02-24 18:00:00	-0.8
1995-02-24 19:00:00	-0.73
1995-02-24 20:00:00	-0.35
1995-02-24 21:00:00	0.1
1995-02-24 22:00:00	0.61
1995-02-24 23:00:00	1.05
1995-02-25	1.43
1995-02-25 01:00:00	1.6
1995-02-25 02:00:00	1.41
1995-02-25 03:00:00	0.85
1995-02-25 04:00:00	0.14
1995-02-25 05:00:00	-0.54
1995-02-25 06:00:00	-1.08
1995-02-25 07:00:00	-1.38
1995-02-25 08:00:00	-1.31
1995-02-25 09:00:00	-0.83
1995-02-25 10:00:00	-0.17
1995-02-25 11:00:00	0.54
1995-02-25 12:00:00	1.13
1995-02-25 13:00:00	1.66
1995-02-25 14:00:00	1.91
1995-02-25 15:00:00	1.8
1995-02-25 16:00:00	1.28
1995-02-25 17:00:00	0.57
1995-02-25 18:00:00	-0.06
1995-02-25 19:00:00	-0.51
1995-02-25 20:00:00	-0.65
1995-02-25 21:00:00	-0.45
1995-02-25 22:00:00	0.05
1995-02-25 23:00:00	0.68
1995-02-26	1.36
1995-02-26 01:00:00	1.91
1995-02-26 02:00:00	2.16
1995-02-26 03:00:00	1.92
1995-02-26 04:00:00	1.21
1995-02-26 05:00:00	0.36
1995-02-26 06:00:00	-0.5
1995-02-26 07:00:00	-1.31
1995-02-26 08:00:00	-1.82
1995-02-26 09:00:00	-1.84
1995-02-26 10:00:00	-1.32
1995-02-26 11:00:00	-0.52
1995-02-26 12:00:00	0.3
1995-02-26 13:00:00	0.94
1995-02-26 14:00:00	1.39
1995-02-26 15:00:00	1.55
1995-02-26 16:00:00	1.28
1995-02-26 17:00:00	0.57
1995-02-26 18:00:00	-0.27
1995-02-26 19:00:00	-1.07
1995-02-26 20:00:00	-1.62
1995-02-26 21:00:00	-1.77
1995-02-26 22:00:00	-1.38
1995-02-26 23:00:00	-0.6
1995-02-27	0.31
1995-02-27 01:00:00	1.13
1995-02-27 02:00:00	1.66
1995-02-27 03:00:00	1.83
1995-02-27 04:00:00	1.59
1995-02-27 05:00:00	0.87
1995-02-27 06:00:00	-0.03
1995-02-27 07:00:00	-1.01
1995-02-27 08:00:00	-1.9
1995-02-27 09:00:00	-2.39
1995-02-27 10:00:00	-2.37
1995-02-27 11:00:00	-1.62
1995-02-27 12:00:00	-0.52
1995-02-27 13:00:00	0.51
1995-02-27 14:00:00	1.29
1995-02-27 15:00:00	1.81
1995-02-27 16:00:00	2.04
1995-02-27 17:00:00	1.65
1995-02-27 18:00:00	0.87
1995-02-27 19:00:00	-0.08
1995-02-27 20:00:00	-1.04
1995-02-27 21:00:00	-1.56
1995-02-27 22:00:00	-1.53
1995-02-27 23:00:00	-0.92
1995-02-28	0.064
1995-02-28 01:00:00	1.14
1995-02-28 02:00:00	2.28
1995-02-28 03:00:00	3.11
1995-02-28 04:00:00	3.26
1995-02-28 05:00:00	2.64
1995-02-28 06:00:00	1.51
1995-02-28 07:00:00	0.42
1995-02-28 08:00:00	-0.66
1995-02-28 09:00:00	-1.46
1995-02-28 10:00:00	-1.76
1995-02-28 11:00:00	-1.53
1995-02-28 12:00:00	-0.74
1995-02-28 13:00:00	0.35
1995-02-28 14:00:00	1.51
1995-02-28 15:00:00	2.31
1995-02-28 16:00:00	2.55
1995-02-28 17:00:00	2.22
1995-02-28 18:00:00	1.27
1995-02-28 19:00:00	0.2
1995-02-28 20:00:00	-0.96
1995-02-28 21:00:00	-1.98
1995-02-28 22:00:00	-2.34
1995-02-28 23:00:00	-2.14
1995-03-01	-1.31
1995-03-01 01:00:00	-0.13
1995-03-01 02:00:00	1.11
1995-03-01 03:00:00	2
1995-03-01 04:00:00	2.42
1995-03-01 05:00:00	2.31
1995-03-01 06:00:00	1.56
1995-03-01 07:00:00	0.49
1995-03-01 08:00:00	-0.65
1995-03-01 09:00:00	-1.85
1995-03-01 10:00:00	-2.63
1995-03-01 11:00:00	-2.83
1995-03-01 12:00:00	-2.28
1995-03-01 13:00:00	-1.01
1995-03-01 14:00:00	0.41
1995-03-01 15:00:00	1.55
1995-03-01 16:00:00	2.15
1995-03-01 17:00:00	2.26
1995-03-01 18:00:00	1.85
1995-03-01 19:00:00	0.89
1995-03-01 20:00:00	-0.16
1995-03-01 21:00:00	-1.31
1995-03-01 22:00:00	-2.06
1995-03-01 23:00:00	-2.15
1995-03-02	-1.91
1995-03-02 01:00:00	-0.89
1995-03-02 02:00:00	0.43
1995-03-02 03:00:00	1.74
1995-03-02 04:00:00	2.58
1995-03-02 05:00:00	2.87
1995-03-02 06:00:00	2.56
1995-03-02 07:00:00	1.59
1995-03-02 08:00:00	0.47
1995-03-02 09:00:00	-0.72
1995-03-02 10:00:00	-1.84
1995-03-02 11:00:00	-2.32
1995-03-02 12:00:00	-2.11
1995-03-02 13:00:00	-1.27
1995-03-02 14:00:00	-0.05
1995-03-02 15:00:00	1.34
1995-03-02 16:00:00	2.4
1995-03-02 17:00:00	2.87
1995-03-02 18:00:00	2.8
1995-03-02 19:00:00	1.99
1995-03-02 20:00:00	0.84
1995-03-02 21:00:00	-0.32
1995-03-02 22:00:00	-1.48
1995-03-02 23:00:00	-2.11
1995-03-03	-2.04
1995-03-03 01:00:00	-1.33
1995-03-03 02:00:00	-0.26
1995-03-03 03:00:00	1.01
1995-03-03 04:00:00	2.14
1995-03-03 05:00:00	2.73
1995-03-03 06:00:00	2.82
1995-03-03 07:00:00	2.19
1995-03-03 08:00:00	1.08
1995-03-03 09:00:00	-0.06
1995-03-03 10:00:00	-1.21
1995-03-03 11:00:00	-2.01
1995-03-03 12:00:00	-2.19
1995-03-03 13:00:00	-1.73
1995-03-03 14:00:00	-0.73
1995-03-03 15:00:00	0.59
1995-03-03 16:00:00	1.79
1995-03-03 17:00:00	2.53
1995-03-03 18:00:00	2.74
1995-03-03 19:00:00	2.39
1995-03-03 20:00:00	1.37
1995-03-03 21:00:00	0.26
1995-03-03 22:00:00	-0.88
1995-03-03 23:00:00	-1.85
1995-03-04	-2.14
1995-03-04 01:00:00	-1.79
1995-03-04 02:00:00	-0.91
1995-03-04 03:00:00	0.24
1995-03-04 04:00:00	1.47
1995-03-04 05:00:00	2.25
1995-03-04 06:00:00	2.51
1995-03-04 07:00:00	2.16
1995-03-04 08:00:00	1.22
1995-03-04 09:00:00	0.11
1995-03-04 10:00:00	-1.06
1995-03-04 11:00:00	-2.03
1995-03-04 12:00:00	-2.32
1995-03-04 13:00:00	-2.09
1995-03-04 14:00:00	-1.33
1995-03-04 15:00:00	-0.21
1995-03-04 16:00:00	0.95
1995-03-04 17:00:00	1.83
1995-03-04 18:00:00	2.22
1995-03-04 19:00:00	2.15
1995-03-04 20:00:00	1.46
1995-03-04 21:00:00	0.42
1995-03-04 22:00:00	-0.68
1995-03-04 23:00:00	-1.74
1995-03-05	-2.32
1995-03-05 01:00:00	-2.33
1995-03-05 02:00:00	-1.66
1995-03-05 03:00:00	-0.56
1995-03-05 04:00:00	0.62
1995-03-05 05:00:00	1.54
1995-03-05 06:00:00	2
1995-03-05 07:00:00	2.05
1995-03-05 08:00:00	1.54
1995-03-05 09:00:00	0.58
1995-03-05 10:00:00	-0.44
1995-03-05 11:00:00	-1.46
1995-03-05 12:00:00	-2.15
1995-03-05 13:00:00	-2.3
1995-03-05 14:00:00	-1.78
1995-03-05 15:00:00	-0.77
1995-03-05 16:00:00	0.39
1995-03-05 17:00:00	1.41
1995-03-05 18:00:00	2.03
1995-03-05 19:00:00	2.21
1995-03-05 20:00:00	1.86
1995-03-05 21:00:00	0.98
1995-03-05 22:00:00	0.01
1995-03-05 23:00:00	-0.98
1995-03-06	-1.75
1995-03-06 01:00:00	-2.02
1995-03-06 02:00:00	-1.69
1995-03-06 03:00:00	-0.87
1995-03-06 04:00:00	0.15
1995-03-06 05:00:00	1.09
1995-03-06 06:00:00	1.76
1995-03-06 07:00:00	1.97
1995-03-06 08:00:00	1.79
1995-03-06 09:00:00	1.08
1995-03-06 10:00:00	0.17
1995-03-06 11:00:00	-0.76
1995-03-06 12:00:00	-1.47
1995-03-06 13:00:00	-1.77
1995-03-06 14:00:00	-1.54
1995-03-06 15:00:00	-0.83
1995-03-06 16:00:00	0.09
1995-03-06 17:00:00	1.03
1995-03-06 18:00:00	1.8
1995-03-06 19:00:00	2.16
1995-03-06 20:00:00	2.11
1995-03-06 21:00:00	1.52
1995-03-06 22:00:00	0.61
1995-03-06 23:00:00	-0.28
1995-03-07	-1.1
1995-03-07 01:00:00	-1.59
1995-03-07 02:00:00	-1.57
1995-03-07 03:00:00	-1.02
1995-03-07 04:00:00	-0.17
1995-03-07 05:00:00	0.74
1995-03-07 06:00:00	1.43
1995-03-07 07:00:00	1.81
1995-03-07 08:00:00	1.82
1995-03-07 09:00:00	1.42
1995-03-07 10:00:00	0.64
1995-03-07 11:00:00	-0.14
1995-03-07 12:00:00	-0.87
1995-03-07 13:00:00	-1.35
1995-03-07 14:00:00	-1.39
1995-03-07 15:00:00	-0.91
1995-03-07 16:00:00	-0.18
1995-03-07 17:00:00	0.65
1995-03-07 18:00:00	1.34
1995-03-07 19:00:00	1.79
1995-03-07 20:00:00	1.9
1995-03-07 21:00:00	1.61
1995-03-07 22:00:00	0.95
1995-03-07 23:00:00	0.16
1995-03-08	-0.57
1995-03-08 01:00:00	-1.15
1995-03-08 02:00:00	-1.36
1995-03-08 03:00:00	-1.1
1995-03-08 04:00:00	-0.5
1995-03-08 05:00:00	0.2
1995-03-08 06:00:00	0.8
1995-03-08 07:00:00	1.21
1995-03-08 08:00:00	1.35
1995-03-08 09:00:00	1.22
1995-03-08 10:00:00	0.8
1995-03-08 11:00:00	0.21
1995-03-08 12:00:00	-0.38
1995-03-08 13:00:00	-0.85
1995-03-08 14:00:00	-1.04
1995-03-08 15:00:00	-0.86
1995-03-08 16:00:00	-0.33
1995-03-08 17:00:00	0.27
1995-03-08 18:00:00	0.83
1995-03-08 19:00:00	1.25
1995-03-08 20:00:00	1.47
1995-03-08 21:00:00	1.49
1995-03-08 22:00:00	1.19
1995-03-08 23:00:00	0.67
1995-03-09	0.03
1995-03-09 01:00:00	-0.49
1995-03-09 02:00:00	-0.81
1995-03-09 03:00:00	-0.79
1995-03-09 04:00:00	-0.51
1995-03-09 05:00:00	-0.14
1995-03-09 06:00:00	0.25
1995-03-09 07:00:00	0.55
1995-03-09 08:00:00	0.79
1995-03-09 09:00:00	0.83
1995-03-09 10:00:00	0.83
1995-03-09 11:00:00	0.68
1995-03-09 12:00:00	0.47
1995-03-09 13:00:00	0.18
1995-03-09 14:00:00	-0.09
1995-03-09 15:00:00	-0.14
1995-03-09 16:00:00	0.01
1995-03-09 17:00:00	0.36
1995-03-09 18:00:00	0.71
1995-03-09 19:00:00	1.05
1995-03-09 20:00:00	1.34
1995-03-09 21:00:00	1.53
1995-03-09 22:00:00	1.5
1995-03-09 23:00:00	1.25
1995-03-10	0.83
1995-03-10 01:00:00	0.4
1995-03-10 02:00:00	-0.06
1995-03-10 03:00:00	-0.38
1995-03-10 04:00:00	-0.44
1995-03-10 05:00:00	-0.3
1995-03-10 06:00:00	-0.12
1995-03-10 07:00:00	0.1
1995-03-10 08:00:00	0.3
1995-03-10 09:00:00	0.58
1995-03-10 10:00:00	0.69
1995-03-10 11:00:00	0.65
1995-03-10 12:00:00	0.43
1995-03-10 13:00:00	0.09
1995-03-10 14:00:00	-0.24
1995-03-10 15:00:00	-0.54
1995-03-10 16:00:00	-0.72
1995-03-10 17:00:00	-0.66
1995-03-10 18:00:00	-0.34
1995-03-10 19:00:00	0.02
1995-03-10 20:00:00	0.32
1995-03-10 21:00:00	0.6
1995-03-10 22:00:00	0.88
1995-03-10 23:00:00	1.05
1995-03-11	1
1995-03-11 01:00:00	0.63
1995-03-11 02:00:00	0.11
1995-03-11 03:00:00	-0.4
1995-03-11 04:00:00	-0.8
1995-03-11 05:00:00	-1.02
1995-03-11 06:00:00	-1.07
1995-03-11 07:00:00	-1.03
1995-03-11 08:00:00	-0.84
1995-03-11 09:00:00	-0.52
1995-03-11 10:00:00	-0.19
1995-03-11 11:00:00	0.03
1995-03-11 12:00:00	0.16
1995-03-11 13:00:00	0.26
1995-03-11 14:00:00	0.41
1995-03-11 15:00:00	0.44
1995-03-11 16:00:00	0.26
1995-03-11 17:00:00	-0.13
1995-03-11 18:00:00	-0.38
1995-03-11 19:00:00	-0.43
1995-03-11 20:00:00	-0.12
1995-03-11 21:00:00	0.26
1995-03-11 22:00:00	0.7
1995-03-11 23:00:00	1
1995-03-12	1.27
1995-03-12 01:00:00	1.39
1995-03-12 02:00:00	1.28
1995-03-12 03:00:00	0.82
1995-03-12 04:00:00	0.23
1995-03-12 05:00:00	-0.28
1995-03-12 06:00:00	-0.66
1995-03-12 07:00:00	-0.82
1995-03-12 08:00:00	-0.75
1995-03-12 09:00:00	-0.41
1995-03-12 10:00:00	0.06
1995-03-12 11:00:00	0.51
1995-03-12 12:00:00	0.94
1995-03-12 13:00:00	1.29
1995-03-12 14:00:00	1.4
1995-03-12 15:00:00	1.19
1995-03-12 16:00:00	0.66
1995-03-12 17:00:00	0.06
1995-03-12 18:00:00	-0.51
1995-03-12 19:00:00	-0.85
1995-03-12 20:00:00	-0.91
1995-03-12 21:00:00	-0.62
1995-03-12 22:00:00	-0.13
1995-03-12 23:00:00	0.44
1995-03-13	0.98
1995-03-13 01:00:00	1.37
1995-03-13 02:00:00	1.55
1995-03-13 03:00:00	1.37
1995-03-13 04:00:00	0.82
1995-03-13 05:00:00	0.09
1995-03-13 06:00:00	-0.63
1995-03-13 07:00:00	-1.22
1995-03-13 08:00:00	-1.54
1995-03-13 09:00:00	-1.45
1995-03-13 10:00:00	-0.95
1995-03-13 11:00:00	-0.3
1995-03-13 12:00:00	0.35
1995-03-13 13:00:00	0.9
1995-03-13 14:00:00	1.28
1995-03-13 15:00:00	1.42
1995-03-13 16:00:00	1.16
1995-03-13 17:00:00	0.54
1995-03-13 18:00:00	-0.16
1995-03-13 19:00:00	-0.81
1995-03-13 20:00:00	-1.23
1995-03-13 21:00:00	-1.25
1995-03-13 22:00:00	-0.82
1995-03-13 23:00:00	-0.13
1995-03-14	0.67
1995-03-14 01:00:00	1.36
1995-03-14 02:00:00	1.81
1995-03-14 03:00:00	1.96
1995-03-14 04:00:00	1.69
1995-03-14 05:00:00	0.98
1995-03-14 06:00:00	0.11
1995-03-14 07:00:00	-0.74
1995-03-14 08:00:00	-1.39
1995-03-14 09:00:00	-1.64
1995-03-14 10:00:00	-1.34
1995-03-14 11:00:00	-0.63
1995-03-14 12:00:00	0.25
1995-03-14 13:00:00	1.07
1995-03-14 14:00:00	1.72
1995-03-14 15:00:00	2.07
1995-03-14 16:00:00	2.03
1995-03-14 17:00:00	1.44
1995-03-14 18:00:00	0.59
1995-03-14 19:00:00	-0.24
1995-03-14 20:00:00	-0.98
1995-03-14 21:00:00	-1.41
1995-03-14 22:00:00	-1.31
1995-03-14 23:00:00	-0.72
1995-03-15	0.2
1995-03-15 01:00:00	1.15
1995-03-15 02:00:00	1.89
1995-03-15 03:00:00	2.24
1995-03-15 04:00:00	2.21
1995-03-15 05:00:00	1.68
1995-03-15 06:00:00	0.75
1995-03-15 07:00:00	-0.32
1995-03-15 08:00:00	-1.33
1995-03-15 09:00:00	-1.95
1995-03-15 10:00:00	-1.97
1995-03-15 11:00:00	-1.43
1995-03-15 12:00:00	-0.49
1995-03-15 13:00:00	0.58
1995-03-15 14:00:00	1.48
1995-03-15 15:00:00	2.03
1995-03-15 16:00:00	2.27
1995-03-15 17:00:00	1.94
1995-03-15 18:00:00	1.03
1995-03-15 19:00:00	-0.036
1995-03-15 20:00:00	-1.14
1995-03-15 21:00:00	-1.93
1995-03-15 22:00:00	-2.03
1995-03-15 23:00:00	-1.6
1995-03-16	-0.77
1995-03-16 01:00:00	0.4
1995-03-16 02:00:00	1.63
1995-03-16 03:00:00	2.52
1995-03-16 04:00:00	2.81
1995-03-16 05:00:00	2.51
1995-03-16 06:00:00	1.5
1995-03-16 07:00:00	0.39
1995-03-16 08:00:00	-0.77
1995-03-16 09:00:00	-1.73
1995-03-16 10:00:00	-2.1
1995-03-16 11:00:00	-1.89
1995-03-16 12:00:00	-1.13
1995-03-16 13:00:00	-0.03
1995-03-16 14:00:00	1.39
1995-03-16 15:00:00	2.49
1995-03-16 16:00:00	3.09
1995-03-16 17:00:00	3.12
1995-03-16 18:00:00	2.29
1995-03-16 19:00:00	1.11
1995-03-16 20:00:00	-0.08
1995-03-16 21:00:00	-1.14
1995-03-16 22:00:00	-1.72
1995-03-16 23:00:00	-1.66
1995-03-17	-1.01
1995-03-17 01:00:00	0.04
1995-03-17 02:00:00	1.22
1995-03-17 03:00:00	2.34
1995-03-17 04:00:00	2.93
1995-03-17 05:00:00	2.92
1995-03-17 06:00:00	2.09
1995-03-17 07:00:00	0.85
1995-03-17 08:00:00	-0.43
1995-03-17 09:00:00	-1.73
1995-03-17 10:00:00	-2.62
1995-03-17 11:00:00	-2.72
1995-03-17 12:00:00	-2.18
1995-03-17 13:00:00	-1.06
1995-03-17 14:00:00	0.19
1995-03-17 15:00:00	1.32
1995-03-17 16:00:00	1.98
1995-03-17 17:00:00	2.13
1995-03-17 18:00:00	1.83
1995-03-17 19:00:00	0.9
1995-03-17 20:00:00	-0.24
1995-03-17 21:00:00	-1.57
1995-03-17 22:00:00	-2.57
1995-03-17 23:00:00	-2.9
1995-03-18	-2.73
1995-03-18 01:00:00	-1.82
1995-03-18 02:00:00	-0.4
1995-03-18 03:00:00	1.03
1995-03-18 04:00:00	2
1995-03-18 05:00:00	2.34
1995-03-18 06:00:00	2.14
1995-03-18 07:00:00	1.32
1995-03-18 08:00:00	0.2
1995-03-18 09:00:00	-1.04
1995-03-18 10:00:00	-2.27
1995-03-18 11:00:00	-2.77
1995-03-18 12:00:00	-2.77
1995-03-18 13:00:00	-2.02
1995-03-18 14:00:00	-0.62
1995-03-18 15:00:00	0.91
1995-03-18 16:00:00	2.11
1995-03-18 17:00:00	2.67
1995-03-18 18:00:00	2.69
1995-03-18 19:00:00	2.01
1995-03-18 20:00:00	0.86
1995-03-18 21:00:00	-0.33
1995-03-18 22:00:00	-1.63
1995-03-18 23:00:00	-2.46
1995-03-19	-2.65
1995-03-19 01:00:00	-2.21
1995-03-19 02:00:00	-1.1
1995-03-19 03:00:00	0.38
1995-03-19 04:00:00	1.72
1995-03-19 05:00:00	2.48
1995-03-19 06:00:00	2.64
1995-03-19 07:00:00	2.2
1995-03-19 08:00:00	1.14
1995-03-19 09:00:00	-0.04
1995-03-19 10:00:00	-1.36
1995-03-19 11:00:00	-2.4
1995-03-19 12:00:00	-2.7
1995-03-19 13:00:00	-2.41
1995-03-19 14:00:00	-1.48
1995-03-19 15:00:00	-0.11
1995-03-19 16:00:00	1.24
1995-03-19 17:00:00	2.2
1995-03-19 18:00:00	2.52
1995-03-19 19:00:00	2.34
1995-03-19 20:00:00	1.53
1995-03-19 21:00:00	0.41
1995-03-19 22:00:00	-0.81
1995-03-19 23:00:00	-2.03
1995-03-20	-2.62
1995-03-20 01:00:00	-2.61
1995-03-20 02:00:00	-1.88
1995-03-20 03:00:00	-0.59
1995-03-20 04:00:00	0.79
1995-03-20 05:00:00	1.82
1995-03-20 06:00:00	2.26
1995-03-20 07:00:00	2.27
1995-03-20 08:00:00	1.68
1995-03-20 09:00:00	0.57
1995-03-20 10:00:00	-0.58
1995-03-20 11:00:00	-1.8
1995-03-20 12:00:00	-2.46
1995-03-20 13:00:00	-2.51
1995-03-20 14:00:00	-1.91
1995-03-20 15:00:00	-0.84
1995-03-20 16:00:00	0.5
1995-03-20 17:00:00	1.68
1995-03-20 18:00:00	2.34
1995-03-20 19:00:00	2.48
1995-03-20 20:00:00	2.11
1995-03-20 21:00:00	1.14
1995-03-20 22:00:00	0.05
1995-03-20 23:00:00	-1.11
1995-03-21	-2.02
1995-03-21 01:00:00	-2.27
1995-03-21 02:00:00	-1.99
1995-03-21 03:00:00	-1.08
1995-03-21 04:00:00	0.11
1995-03-21 05:00:00	1.3
1995-03-21 06:00:00	2.1
1995-03-21 07:00:00	2.42
1995-03-21 08:00:00	2.29
1995-03-21 09:00:00	1.48
1995-03-21 10:00:00	0.38
1995-03-21 11:00:00	-0.72
1995-03-21 12:00:00	-1.66
1995-03-21 13:00:00	-2
1995-03-21 14:00:00	-1.77
1995-03-21 15:00:00	-1.02
1995-03-21 16:00:00	0.01
1995-03-21 17:00:00	1.11
1995-03-21 18:00:00	2.03
1995-03-21 19:00:00	2.51
1995-03-21 20:00:00	2.57
1995-03-21 21:00:00	1.98
1995-03-21 22:00:00	0.91
1995-03-21 23:00:00	-0.13
1995-03-22	-1.17
1995-03-22 01:00:00	-1.85
1995-03-22 02:00:00	-1.94
1995-03-22 03:00:00	-1.42
1995-03-22 04:00:00	-0.55
1995-03-22 05:00:00	0.46
1995-03-22 06:00:00	1.34
1995-03-22 07:00:00	1.88
1995-03-22 08:00:00	2.06
1995-03-22 09:00:00	1.81
1995-03-22 10:00:00	1.02
1995-03-22 11:00:00	0.07
1995-03-22 12:00:00	-0.84
1995-03-22 13:00:00	-1.49
1995-03-22 14:00:00	-1.66
1995-03-22 15:00:00	-1.25
1995-03-22 16:00:00	-0.47
1995-03-22 17:00:00	0.44
1995-03-22 18:00:00	1.29
1995-03-22 19:00:00	1.9
1995-03-22 20:00:00	2.17
1995-03-22 21:00:00	2.09
1995-03-22 22:00:00	1.52
1995-03-22 23:00:00	0.6
1995-03-23	-0.26
1995-03-23 01:00:00	-1.04
1995-03-23 02:00:00	-1.45
1995-03-23 03:00:00	-1.36
1995-03-23 04:00:00	-0.82
1995-03-23 05:00:00	-0.07
1995-03-23 06:00:00	0.66
1995-03-23 07:00:00	1.28
1995-03-23 08:00:00	1.69
1995-03-23 09:00:00	1.88
1995-03-23 10:00:00	1.68
1995-03-23 11:00:00	1.07
1995-03-23 12:00:00	0.35
1995-03-23 13:00:00	-0.33
1995-03-23 14:00:00	-0.81
1995-03-23 15:00:00	-0.96
1995-03-23 16:00:00	-0.61
1995-03-23 17:00:00	0.03
1995-03-23 18:00:00	0.72
1995-03-23 19:00:00	1.37
1995-03-23 20:00:00	1.81
1995-03-23 21:00:00	2.06
1995-03-23 22:00:00	1.97
1995-03-23 23:00:00	1.5
1995-03-24	0.83
1995-03-24 01:00:00	0.16
1995-03-24 02:00:00	-0.5
1995-03-24 03:00:00	-0.89
1995-03-24 04:00:00	-0.97
1995-03-24 05:00:00	-0.57
1995-03-24 06:00:00	-0.073
1995-03-24 07:00:00	0.51
1995-03-24 08:00:00	1
1995-03-24 09:00:00	1.44
1995-03-24 10:00:00	1.69
1995-03-24 11:00:00	1.69
1995-03-24 12:00:00	1.31
1995-03-24 13:00:00	0.79
1995-03-24 14:00:00	0.3
1995-03-24 15:00:00	-0.13
1995-03-24 16:00:00	-0.3
1995-03-24 17:00:00	-0.24
1995-03-24 18:00:00	0.12
1995-03-24 19:00:00	0.61
1995-03-24 20:00:00	1.04
1995-03-24 21:00:00	1.44
1995-03-24 22:00:00	1.76
1995-03-24 23:00:00	1.88
1995-03-25	1.79
1995-03-25 01:00:00	1.26
1995-03-25 02:00:00	0.61
1995-03-25 03:00:00	0.01
1995-03-25 04:00:00	-0.49
[truncated: 6,763 more rows]

## Sheet: Tokyo
Location: Tokyo
Source:
Date Time (GMT)	Height(m)
2019-01-01 01:00:00	1.67
2019-01-01 02:00:00	1.76
2019-01-01 03:00:00	1.8
2019-01-01 04:00:00	1.79
2019-01-01 05:00:00	1.73
2019-01-01 06:00:00	1.62
2019-01-01 07:00:00	1.46
2019-01-01 08:00:00	1.28
2019-01-01 09:00:00	1.13
2019-01-01 10:00:00	1.04
2019-01-01 11:00:00	1.02
2019-01-01 12:00:00	1.06
2019-01-01 13:00:00	1.15
2019-01-01 14:00:00	1.29
2019-01-01 15:00:00	1.45
2019-01-01 16:00:00	1.59
2019-01-01 17:00:00	1.69
2019-01-01 18:00:00	1.71
2019-01-01 19:00:00	1.67
2019-01-01 20:00:00	1.58
2019-01-01 21:00:00	1.49
2019-01-01 22:00:00	1.43
2019-01-01 23:00:00	1.42
2019-01-02	1.47
2019-01-02 01:00:00	1.56
2019-01-02 02:00:00	1.67
2019-01-02 03:00:00	1.77
2019-01-02 04:00:00	1.84
2019-01-02 05:00:00	1.84
2019-01-02 06:00:00	1.75
2019-01-02 07:00:00	1.58
2019-01-02 08:00:00	1.36
2019-01-02 09:00:00	1.14
2019-01-02 10:00:00	0.95
2019-01-02 11:00:00	0.84
2019-01-02 12:00:00	0.82
2019-01-02 13:00:00	0.9
2019-01-02 14:00:00	1.06
2019-01-02 15:00:00	1.26
2019-01-02 16:00:00	1.47
2019-01-02 17:00:00	1.64
2019-01-02 18:00:00	1.73
2019-01-02 19:00:00	1.75
2019-01-02 20:00:00	1.7
2019-01-02 21:00:00	1.61
2019-01-02 22:00:00	1.52
2019-01-02 23:00:00	1.47
2019-01-03	1.47
2019-01-03 01:00:00	1.53
2019-01-03 02:00:00	1.63
2019-01-03 03:00:00	1.76
2019-01-03 04:00:00	1.88
2019-01-03 05:00:00	1.95
2019-01-03 06:00:00	1.92
2019-01-03 07:00:00	1.79
2019-01-03 08:00:00	1.56
2019-01-03 09:00:00	1.28
2019-01-03 10:00:00	1.02
2019-01-03 11:00:00	0.82
2019-01-03 12:00:00	0.71
2019-01-03 13:00:00	0.72
2019-01-03 14:00:00	0.84
2019-01-03 15:00:00	1.05
2019-01-03 16:00:00	1.3
2019-01-03 17:00:00	1.53
2019-01-03 18:00:00	1.7
2019-01-03 19:00:00	1.78
2019-01-03 20:00:00	1.78
2019-01-03 21:00:00	1.7
2019-01-03 22:00:00	1.59
2019-01-03 23:00:00	1.47
2019-01-04	1.4
2019-01-04 01:00:00	1.41
2019-01-04 02:00:00	1.5
2019-01-04 03:00:00	1.64
2019-01-04 04:00:00	1.79
2019-01-04 05:00:00	1.9
2019-01-04 06:00:00	1.93
2019-01-04 07:00:00	1.85
2019-01-04 08:00:00	1.69
2019-01-04 09:00:00	1.44
2019-01-04 10:00:00	1.15
2019-01-04 11:00:00	0.9
2019-01-04 12:00:00	0.73
2019-01-04 13:00:00	0.67
2019-01-04 14:00:00	0.75
2019-01-04 15:00:00	0.95
2019-01-04 16:00:00	1.21
2019-01-04 17:00:00	1.49
2019-01-04 18:00:00	1.74
2019-01-04 19:00:00	1.92
2019-01-04 20:00:00	2
2019-01-04 21:00:00	1.97
2019-01-04 22:00:00	1.86
2019-01-04 23:00:00	1.71
2019-01-05	1.58
2019-01-05 01:00:00	1.52
2019-01-05 02:00:00	1.55
2019-01-05 03:00:00	1.65
2019-01-05 04:00:00	1.81
2019-01-05 05:00:00	1.97
2019-01-05 06:00:00	2.08
2019-01-05 07:00:00	2.09
2019-01-05 08:00:00	1.96
2019-01-05 09:00:00	1.71
2019-01-05 10:00:00	1.39
2019-01-05 11:00:00	1.08
2019-01-05 12:00:00	0.82
2019-01-05 13:00:00	0.66
2019-01-05 14:00:00	0.65
2019-01-05 15:00:00	0.78
2019-01-05 16:00:00	1.01
2019-01-05 17:00:00	1.29
2019-01-05 18:00:00	1.57
2019-01-05 19:00:00	1.8
2019-01-05 20:00:00	1.93
2019-01-05 21:00:00	1.94
2019-01-05 22:00:00	1.85
2019-01-05 23:00:00	1.71
2019-01-06	1.57
2019-01-06 01:00:00	1.46
2019-01-06 02:00:00	1.42
2019-01-06 03:00:00	1.5
2019-01-06 04:00:00	1.66
2019-01-06 05:00:00	1.85
2019-01-06 06:00:00	2
2019-01-06 07:00:00	2.05
2019-01-06 08:00:00	1.98
2019-01-06 09:00:00	1.78
2019-01-06 10:00:00	1.5
2019-01-06 11:00:00	1.19
2019-01-06 12:00:00	0.91
2019-01-06 13:00:00	0.7
2019-01-06 14:00:00	0.62
2019-01-06 15:00:00	0.68
2019-01-06 16:00:00	0.86
2019-01-06 17:00:00	1.14
2019-01-06 18:00:00	1.44
2019-01-06 19:00:00	1.7
2019-01-06 20:00:00	1.89
2019-01-06 21:00:00	1.97
2019-01-06 22:00:00	1.93
2019-01-06 23:00:00	1.81
2019-01-07	1.65
2019-01-07 01:00:00	1.51
2019-01-07 02:00:00	1.43
2019-01-07 03:00:00	1.45
2019-01-07 04:00:00	1.56
2019-01-07 05:00:00	1.74
2019-01-07 06:00:00	1.92
2019-01-07 07:00:00	2.03
2019-01-07 08:00:00	2.02
2019-01-07 09:00:00	1.88
2019-01-07 10:00:00	1.64
2019-01-07 11:00:00	1.33
2019-01-07 12:00:00	1.02
2019-01-07 13:00:00	0.76
2019-01-07 14:00:00	0.62
2019-01-07 15:00:00	0.62
2019-01-07 16:00:00	0.75
2019-01-07 17:00:00	0.98
2019-01-07 18:00:00	1.26
2019-01-07 19:00:00	1.55
2019-01-07 20:00:00	1.79
2019-01-07 21:00:00	1.93
2019-01-07 22:00:00	1.95
2019-01-07 23:00:00	1.85
2019-01-08	1.7
2019-01-08 01:00:00	1.54
2019-01-08 02:00:00	1.42
2019-01-08 03:00:00	1.4
2019-01-08 04:00:00	1.48
2019-01-08 05:00:00	1.65
2019-01-08 06:00:00	1.85
2019-01-08 07:00:00	2
2019-01-08 08:00:00	2.06
2019-01-08 09:00:00	2
2019-01-08 10:00:00	1.82
2019-01-08 11:00:00	1.57
2019-01-08 12:00:00	1.28
2019-01-08 13:00:00	1
2019-01-08 14:00:00	0.8
2019-01-08 15:00:00	0.72
2019-01-08 16:00:00	0.77
2019-01-08 17:00:00	0.93
2019-01-08 18:00:00	1.17
2019-01-08 19:00:00	1.43
2019-01-08 20:00:00	1.69
2019-01-08 21:00:00	1.86
2019-01-08 22:00:00	1.91
2019-01-08 23:00:00	1.85
2019-01-09	1.71
2019-01-09 01:00:00	1.53
2019-01-09 02:00:00	1.37
2019-01-09 03:00:00	1.28
2019-01-09 04:00:00	1.3
2019-01-09 05:00:00	1.42
2019-01-09 06:00:00	1.59
2019-01-09 07:00:00	1.75
2019-01-09 08:00:00	1.85
2019-01-09 09:00:00	1.85
2019-01-09 10:00:00	1.75
2019-01-09 11:00:00	1.55
2019-01-09 12:00:00	1.3
2019-01-09 13:00:00	1.04
2019-01-09 14:00:00	0.81
2019-01-09 15:00:00	0.68
2019-01-09 16:00:00	0.67
2019-01-09 17:00:00	0.78
2019-01-09 18:00:00	0.97
2019-01-09 19:00:00	1.22
2019-01-09 20:00:00	1.48
2019-01-09 21:00:00	1.7
2019-01-09 22:00:00	1.83
2019-01-09 23:00:00	1.84
2019-01-10	1.76
2019-01-10 01:00:00	1.62
2019-01-10 02:00:00	1.46
2019-01-10 03:00:00	1.34
2019-01-10 04:00:00	1.31
2019-01-10 05:00:00	1.38
2019-01-10 06:00:00	1.52
2019-01-10 07:00:00	1.68
2019-01-10 08:00:00	1.82
2019-01-10 09:00:00	1.89
2019-01-10 10:00:00	1.85
2019-01-10 11:00:00	1.69
2019-01-10 12:00:00	1.47
2019-01-10 13:00:00	1.22
2019-01-10 14:00:00	0.98
2019-01-10 15:00:00	0.81
2019-01-10 16:00:00	0.75
2019-01-10 17:00:00	0.8
2019-01-10 18:00:00	0.95
2019-01-10 19:00:00	1.16
2019-01-10 20:00:00	1.4
2019-01-10 21:00:00	1.61
2019-01-10 22:00:00	1.76
2019-01-10 23:00:00	1.81
2019-01-11	1.77
2019-01-11 01:00:00	1.66
2019-01-11 02:00:00	1.5
2019-01-11 03:00:00	1.35
2019-01-11 04:00:00	1.26
2019-01-11 05:00:00	1.27
2019-01-11 06:00:00	1.34
2019-01-11 07:00:00	1.47
2019-01-11 08:00:00	1.6
2019-01-11 09:00:00	1.68
2019-01-11 10:00:00	1.69
2019-01-11 11:00:00	1.62
2019-01-11 12:00:00	1.48
2019-01-11 13:00:00	1.29
2019-01-11 14:00:00	1.09
2019-01-11 15:00:00	0.91
2019-01-11 16:00:00	0.8
2019-01-11 17:00:00	0.78
2019-01-11 18:00:00	0.86
2019-01-11 19:00:00	1.02
2019-01-11 20:00:00	1.23
2019-01-11 21:00:00	1.45
2019-01-11 22:00:00	1.62
2019-01-11 23:00:00	1.74
2019-01-12	1.76
2019-01-12 01:00:00	1.7
2019-01-12 02:00:00	1.59
2019-01-12 03:00:00	1.45
2019-01-12 04:00:00	1.33
2019-01-12 05:00:00	1.29
2019-01-12 06:00:00	1.32
2019-01-12 07:00:00	1.39
2019-01-12 08:00:00	1.5
2019-01-12 09:00:00	1.6
2019-01-12 10:00:00	1.67
2019-01-12 11:00:00	1.68
2019-01-12 12:00:00	1.62
2019-01-12 13:00:00	1.5
2019-01-12 14:00:00	1.33
2019-01-12 15:00:00	1.17
2019-01-12 16:00:00	1.05
2019-01-12 17:00:00	0.99
2019-01-12 18:00:00	1
2019-01-12 19:00:00	1.1
2019-01-12 20:00:00	1.25
2019-01-12 21:00:00	1.44
2019-01-12 22:00:00	1.63
2019-01-12 23:00:00	1.77
2019-01-13	1.83
2019-01-13 01:00:00	1.8
2019-01-13 02:00:00	1.7
2019-01-13 03:00:00	1.56
2019-01-13 04:00:00	1.42
2019-01-13 05:00:00	1.32
2019-01-13 06:00:00	1.28
2019-01-13 07:00:00	1.3
2019-01-13 08:00:00	1.35
2019-01-13 09:00:00	1.43
2019-01-13 10:00:00	1.5
2019-01-13 11:00:00	1.55
2019-01-13 12:00:00	1.54
2019-01-13 13:00:00	1.48
2019-01-13 14:00:00	1.38
2019-01-13 15:00:00	1.27
2019-01-13 16:00:00	1.16
2019-01-13 17:00:00	1.09
2019-01-13 18:00:00	1.07
2019-01-13 19:00:00	1.12
2019-01-13 20:00:00	1.22
2019-01-13 21:00:00	1.36
2019-01-13 22:00:00	1.52
2019-01-13 23:00:00	1.66
2019-01-14	1.76
2019-01-14 01:00:00	1.78
2019-01-14 02:00:00	1.74
2019-01-14 03:00:00	1.63
2019-01-14 04:00:00	1.5
2019-01-14 05:00:00	1.37
2019-01-14 06:00:00	1.27
2019-01-14 07:00:00	1.21
2019-01-14 08:00:00	1.2
2019-01-14 09:00:00	1.23
2019-01-14 10:00:00	1.3
2019-01-14 11:00:00	1.37
2019-01-14 12:00:00	1.43
2019-01-14 13:00:00	1.45
2019-01-14 14:00:00	1.44
2019-01-14 15:00:00	1.39
2019-01-14 16:00:00	1.31
2019-01-14 17:00:00	1.23
2019-01-14 18:00:00	1.18
2019-01-14 19:00:00	1.18
2019-01-14 20:00:00	1.23
2019-01-14 21:00:00	1.32
2019-01-14 22:00:00	1.45
2019-01-14 23:00:00	1.58
2019-01-15	1.7
2019-01-15 01:00:00	1.78
2019-01-15 02:00:00	1.8
2019-01-15 03:00:00	1.76
2019-01-15 04:00:00	1.67
2019-01-15 05:00:00	1.55
2019-01-15 06:00:00	1.43
2019-01-15 07:00:00	1.34
2019-01-15 08:00:00	1.27
2019-01-15 09:00:00	1.26
2019-01-15 10:00:00	1.3
2019-01-15 11:00:00	1.38
2019-01-15 12:00:00	1.47
2019-01-15 13:00:00	1.55
2019-01-15 14:00:00	1.61
2019-01-15 15:00:00	1.62
2019-01-15 16:00:00	1.61
2019-01-15 17:00:00	1.56
2019-01-15 18:00:00	1.51
2019-01-15 19:00:00	1.46
2019-01-15 20:00:00	1.43
2019-01-15 21:00:00	1.44
2019-01-15 22:00:00	1.48
2019-01-15 23:00:00	1.56
2019-01-16	1.66
2019-01-16 01:00:00	1.74
2019-01-16 02:00:00	1.79
2019-01-16 03:00:00	1.78
2019-01-16 04:00:00	1.71
2019-01-16 05:00:00	1.59
2019-01-16 06:00:00	1.45
2019-01-16 07:00:00	1.3
2019-01-16 08:00:00	1.15
2019-01-16 09:00:00	1.05
2019-01-16 10:00:00	1.01
2019-01-16 11:00:00	1.05
2019-01-16 12:00:00	1.15
2019-01-16 13:00:00	1.28
2019-01-16 14:00:00	1.43
2019-01-16 15:00:00	1.56
2019-01-16 16:00:00	1.66
2019-01-16 17:00:00	1.69
2019-01-16 18:00:00	1.66
2019-01-16 19:00:00	1.6
2019-01-16 20:00:00	1.53
2019-01-16 21:00:00	1.48
2019-01-16 22:00:00	1.47
2019-01-16 23:00:00	1.51
2019-01-17	1.6
2019-01-17 01:00:00	1.7
2019-01-17 02:00:00	1.81
2019-01-17 03:00:00	1.88
2019-01-17 04:00:00	1.9
2019-01-17 05:00:00	1.84
2019-01-17 06:00:00	1.7
2019-01-17 07:00:00	1.51
2019-01-17 08:00:00	1.3
2019-01-17 09:00:00	1.11
2019-01-17 10:00:00	0.98
2019-01-17 11:00:00	0.94
2019-01-17 12:00:00	0.98
2019-01-17 13:00:00	1.11
2019-01-17 14:00:00	1.28
2019-01-17 15:00:00	1.46
2019-01-17 16:00:00	1.63
2019-01-17 17:00:00	1.75
2019-01-17 18:00:00	1.78
2019-01-17 19:00:00	1.73
2019-01-17 20:00:00	1.64
2019-01-17 21:00:00	1.54
2019-01-17 22:00:00	1.47
2019-01-17 23:00:00	1.45
2019-01-18	1.48
2019-01-18 01:00:00	1.56
2019-01-18 02:00:00	1.67
2019-01-18 03:00:00	1.77
2019-01-18 04:00:00	1.85
2019-01-18 05:00:00	1.86
2019-01-18 06:00:00	1.78
2019-01-18 07:00:00	1.6
2019-01-18 08:00:00	1.35
2019-01-18 09:00:00	1.08
2019-01-18 10:00:00	0.85
2019-01-18 11:00:00	0.7
2019-01-18 12:00:00	0.66
2019-01-18 13:00:00	0.74
2019-01-18 14:00:00	0.92
2019-01-18 15:00:00	1.16
2019-01-18 16:00:00	1.41
2019-01-18 17:00:00	1.62
2019-01-18 18:00:00	1.75
2019-01-18 19:00:00	1.78
2019-01-18 20:00:00	1.74
2019-01-18 21:00:00	1.64
2019-01-18 22:00:00	1.52
2019-01-18 23:00:00	1.42
2019-01-19	1.39
2019-01-19 01:00:00	1.43
2019-01-19 02:00:00	1.52
2019-01-19 03:00:00	1.65
2019-01-19 04:00:00	1.78
2019-01-19 05:00:00	1.87
2019-01-19 06:00:00	1.89
2019-01-19 07:00:00	1.79
2019-01-19 08:00:00	1.57
2019-01-19 09:00:00	1.28
2019-01-19 10:00:00	0.97
2019-01-19 11:00:00	0.72
2019-01-19 12:00:00	0.57
2019-01-19 13:00:00	0.56
2019-01-19 14:00:00	0.68
2019-01-19 15:00:00	0.91
2019-01-19 16:00:00	1.22
2019-01-19 17:00:00	1.53
2019-01-19 18:00:00	1.77
2019-01-19 19:00:00	1.91
2019-01-19 20:00:00	1.95
2019-01-19 21:00:00	1.88
2019-01-19 22:00:00	1.75
2019-01-19 23:00:00	1.6
2019-01-20	1.51
2019-01-20 01:00:00	1.49
2019-01-20 02:00:00	1.56
2019-01-20 03:00:00	1.7
2019-01-20 04:00:00	1.9
2019-01-20 05:00:00	2.09
2019-01-20 06:00:00	2.2
2019-01-20 07:00:00	2.18
2019-01-20 08:00:00	2.02
2019-01-20 09:00:00	1.71
2019-01-20 10:00:00	1.33
2019-01-20 11:00:00	0.96
2019-01-20 12:00:00	0.69
2019-01-20 13:00:00	0.54
2019-01-20 14:00:00	0.55
2019-01-20 15:00:00	0.71
2019-01-20 16:00:00	0.98
2019-01-20 17:00:00	1.31
2019-01-20 18:00:00	1.63
2019-01-20 19:00:00	1.88
2019-01-20 20:00:00	2.02
2019-01-20 21:00:00	2.02
2019-01-20 22:00:00	1.9
2019-01-20 23:00:00	1.72
2019-01-21	1.55
2019-01-21 01:00:00	1.43
2019-01-21 02:00:00	1.42
2019-01-21 03:00:00	1.52
2019-01-21 04:00:00	1.69
2019-01-21 05:00:00	1.91
2019-01-21 06:00:00	2.09
2019-01-21 07:00:00	2.18
2019-01-21 08:00:00	2.13
2019-01-21 09:00:00	1.92
2019-01-21 10:00:00	1.57
2019-01-21 11:00:00	1.19
2019-01-21 12:00:00	0.83
2019-01-21 13:00:00	0.58
2019-01-21 14:00:00	0.48
2019-01-21 15:00:00	0.54
2019-01-21 16:00:00	0.76
2019-01-21 17:00:00	1.09
2019-01-21 18:00:00	1.45
2019-01-21 19:00:00	1.78
2019-01-21 20:00:00	2.02
2019-01-21 21:00:00	2.11
2019-01-21 22:00:00	2.06
2019-01-21 23:00:00	1.9
2019-01-22	1.68
2019-01-22 01:00:00	1.49
2019-01-22 02:00:00	1.38
2019-01-22 03:00:00	1.4
2019-01-22 04:00:00	1.53
2019-01-22 05:00:00	1.73
2019-01-22 06:00:00	1.94
2019-01-22 07:00:00	2.1
2019-01-22 08:00:00	2.15
2019-01-22 09:00:00	2.05
2019-01-22 10:00:00	1.79
2019-01-22 11:00:00	1.43
2019-01-22 12:00:00	1.05
2019-01-22 13:00:00	0.72
2019-01-22 14:00:00	0.5
2019-01-22 15:00:00	0.44
2019-01-22 16:00:00	0.54
2019-01-22 17:00:00	0.79
2019-01-22 18:00:00	1.12
2019-01-22 19:00:00	1.48
2019-01-22 20:00:00	1.79
2019-01-22 21:00:00	1.98
2019-01-22 22:00:00	2.03
2019-01-22 23:00:00	1.94
2019-01-23	1.75
2019-01-23 01:00:00	1.53
2019-01-23 02:00:00	1.35
2019-01-23 03:00:00	1.29
2019-01-23 04:00:00	1.36
2019-01-23 05:00:00	1.55
2019-01-23 06:00:00	1.8
2019-01-23 07:00:00	2.03
2019-01-23 08:00:00	2.18
2019-01-23 09:00:00	2.2
2019-01-23 10:00:00	2.07
2019-01-23 11:00:00	1.79
2019-01-23 12:00:00	1.43
2019-01-23 13:00:00	1.06
2019-01-23 14:00:00	0.75
2019-01-23 15:00:00	0.58
2019-01-23 16:00:00	0.57
2019-01-23 17:00:00	0.72
2019-01-23 18:00:00	0.97
2019-01-23 19:00:00	1.3
2019-01-23 20:00:00	1.63
2019-01-23 21:00:00	1.9
2019-01-23 22:00:00	2.02
2019-01-23 23:00:00	2
2019-01-24	1.85
2019-01-24 01:00:00	1.63
2019-01-24 02:00:00	1.42
2019-01-24 03:00:00	1.27
2019-01-24 04:00:00	1.24
2019-01-24 05:00:00	1.33
2019-01-24 06:00:00	1.51
2019-01-24 07:00:00	1.72
2019-01-24 08:00:00	1.91
2019-01-24 09:00:00	2.02
2019-01-24 10:00:00	2.01
2019-01-24 11:00:00	1.86
2019-01-24 12:00:00	1.59
2019-01-24 13:00:00	1.27
2019-01-24 14:00:00	0.96
2019-01-24 15:00:00	0.73
2019-01-24 16:00:00	0.62
2019-01-24 17:00:00	0.66
2019-01-24 18:00:00	0.83
2019-01-24 19:00:00	1.1
2019-01-24 20:00:00	1.42
2019-01-24 21:00:00	1.7
2019-01-24 22:00:00	1.89
2019-01-24 23:00:00	1.94
2019-01-25	1.87
2019-01-25 01:00:00	1.71
2019-01-25 02:00:00	1.5
2019-01-25 03:00:00	1.32
2019-01-25 04:00:00	1.23
2019-01-25 05:00:00	1.23
2019-01-25 06:00:00	1.34
2019-01-25 07:00:00	1.51
2019-01-25 08:00:00	1.71
2019-01-25 09:00:00	1.88
2019-01-25 10:00:00	1.97
2019-01-25 11:00:00	1.97
2019-01-25 12:00:00	1.84
2019-01-25 13:00:00	1.63
2019-01-25 14:00:00	1.38
2019-01-25 15:00:00	1.14
2019-01-25 16:00:00	0.99
2019-01-25 17:00:00	0.95
2019-01-25 18:00:00	1.04
2019-01-25 19:00:00	1.23
2019-01-25 20:00:00	1.49
2019-01-25 21:00:00	1.75
2019-01-25 22:00:00	1.96
2019-01-25 23:00:00	2.06
2019-01-26	2.05
2019-01-26 01:00:00	1.94
2019-01-26 02:00:00	1.75
2019-01-26 03:00:00	1.54
2019-01-26 04:00:00	1.37
2019-01-26 05:00:00	1.29
2019-01-26 06:00:00	1.31
2019-01-26 07:00:00	1.39
2019-01-26 08:00:00	1.53
2019-01-26 09:00:00	1.67
2019-01-26 10:00:00	1.78
2019-01-26 11:00:00	1.83
2019-01-26 12:00:00	1.8
2019-01-26 13:00:00	1.69
2019-01-26 14:00:00	1.51
2019-01-26 15:00:00	1.31
2019-01-26 16:00:00	1.14
2019-01-26 17:00:00	1.04
2019-01-26 18:00:00	1.04
2019-01-26 19:00:00	1.13
2019-01-26 20:00:00	1.31
2019-01-26 21:00:00	1.52
2019-01-26 22:00:00	1.73
2019-01-26 23:00:00	1.88
2019-01-27	1.93
2019-01-27 01:00:00	1.87
2019-01-27 02:00:00	1.72
2019-01-27 03:00:00	1.53
2019-01-27 04:00:00	1.35
2019-01-27 05:00:00	1.22
2019-01-27 06:00:00	1.16
2019-01-27 07:00:00	1.17
2019-01-27 08:00:00	1.24
2019-01-27 09:00:00	1.34
2019-01-27 10:00:00	1.46
2019-01-27 11:00:00	1.55
2019-01-27 12:00:00	1.6
2019-01-27 13:00:00	1.59
2019-01-27 14:00:00	1.51
2019-01-27 15:00:00	1.4
2019-01-27 16:00:00	1.28
2019-01-27 17:00:00	1.19
2019-01-27 18:00:00	1.15
2019-01-27 19:00:00	1.19
2019-01-27 20:00:00	1.3
2019-01-27 21:00:00	1.46
2019-01-27 22:00:00	1.64
2019-01-27 23:00:00	1.79
2019-01-28	1.88
2019-01-28 01:00:00	1.9
2019-01-28 02:00:00	1.84
2019-01-28 03:00:00	1.71
2019-01-28 04:00:00	1.55
2019-01-28 05:00:00	1.4
2019-01-28 06:00:00	1.29
2019-01-28 07:00:00	1.23
2019-01-28 08:00:00	1.22
2019-01-28 09:00:00	1.27
2019-01-28 10:00:00	1.35
2019-01-28 11:00:00	1.46
2019-01-28 12:00:00	1.54
2019-01-28 13:00:00	1.59
2019-01-28 14:00:00	1.6
2019-01-28 15:00:00	1.58
2019-01-28 16:00:00	1.52
2019-01-28 17:00:00	1.43
2019-01-28 18:00:00	1.36
2019-01-28 19:00:00	1.33
2019-01-28 20:00:00	1.34
2019-01-28 21:00:00	1.41
2019-01-28 22:00:00	1.51
2019-01-28 23:00:00	1.62
2019-01-29	1.71
2019-01-29 01:00:00	1.76
2019-01-29 02:00:00	1.74
2019-01-29 03:00:00	1.66
2019-01-29 04:00:00	1.55
2019-01-29 05:00:00	1.4
2019-01-29 06:00:00	1.26
2019-01-29 07:00:00	1.14
2019-01-29 08:00:00	1.06
2019-01-29 09:00:00	1.02
2019-01-29 10:00:00	1.04
2019-01-29 11:00:00	1.09
2019-01-29 12:00:00	1.18
2019-01-29 13:00:00	1.27
2019-01-29 14:00:00	1.36
2019-01-29 15:00:00	1.41
2019-01-29 16:00:00	1.44
2019-01-29 17:00:00	1.43
2019-01-29 18:00:00	1.4
2019-01-29 19:00:00	1.37
2019-01-29 20:00:00	1.36
2019-01-29 21:00:00	1.38
2019-01-29 22:00:00	1.43
2019-01-29 23:00:00	1.5
2019-01-30	1.59
2019-01-30 01:00:00	1.66
2019-01-30 02:00:00	1.7
2019-01-30 03:00:00	1.7
2019-01-30 04:00:00	1.65
2019-01-30 05:00:00	1.55
2019-01-30 06:00:00	1.41
2019-01-30 07:00:00	1.27
2019-01-30 08:00:00	1.13
2019-01-30 09:00:00	1.03
2019-01-30 10:00:00	0.98
2019-01-30 11:00:00	0.99
2019-01-30 12:00:00	1.05
2019-01-30 13:00:00	1.16
2019-01-30 14:00:00	1.29
2019-01-30 15:00:00	1.43
2019-01-30 16:00:00	1.55
2019-01-30 17:00:00	1.63
2019-01-30 18:00:00	1.67
2019-01-30 19:00:00	1.66
2019-01-30 20:00:00	1.64
2019-01-30 21:00:00	1.61
2019-01-30 22:00:00	1.6
2019-01-30 23:00:00	1.61
2019-01-31	1.66
2019-01-31 01:00:00	1.74
2019-01-31 02:00:00	1.82
2019-01-31 03:00:00	1.88
2019-01-31 04:00:00	1.88
2019-01-31 05:00:00	1.83
2019-01-31 06:00:00	1.71
2019-01-31 07:00:00	1.56
2019-01-31 08:00:00	1.38
2019-01-31 09:00:00	1.21
2019-01-31 10:00:00	1.07
2019-01-31 11:00:00	1
2019-01-31 12:00:00	1.01
2019-01-31 13:00:00	1.08
2019-01-31 14:00:00	1.22
2019-01-31 15:00:00	1.38
2019-01-31 16:00:00	1.54
2019-01-31 17:00:00	1.69
2019-01-31 18:00:00	1.77
2019-01-31 19:00:00	1.78
2019-01-31 20:00:00	1.73
2019-01-31 21:00:00	1.66
2019-01-31 22:00:00	1.58
2019-01-31 23:00:00	1.53
2019-02-01	1.52
2019-02-01 01:00:00	1.57
2019-02-01 02:00:00	1.64
2019-02-01 03:00:00	1.72
2019-02-01 04:00:00	1.78
2019-02-01 05:00:00	1.8
2019-02-01 06:00:00	1.76
2019-02-01 07:00:00	1.65
2019-02-01 08:00:00	1.47
2019-02-01 09:00:00	1.26
2019-02-01 10:00:00	1.05
2019-02-01 11:00:00	0.9
2019-02-01 12:00:00	0.84
2019-02-01 13:00:00	0.87
2019-02-01 14:00:00	0.97
2019-02-01 15:00:00	1.15
2019-02-01 16:00:00	1.37
2019-02-01 17:00:00	1.57
2019-02-01 18:00:00	1.72
2019-02-01 19:00:00	1.79
2019-02-01 20:00:00	1.77
2019-02-01 21:00:00	1.69
2019-02-01 22:00:00	1.58
2019-02-01 23:00:00	1.48
2019-02-02	1.41
2019-02-02 01:00:00	1.41
2019-02-02 02:00:00	1.47
2019-02-02 03:00:00	1.57
2019-02-02 04:00:00	1.68
2019-02-02 05:00:00	1.77
2019-02-02 06:00:00	1.8
2019-02-02 07:00:00	1.73
2019-02-02 08:00:00	1.57
2019-02-02 09:00:00	1.34
2019-02-02 10:00:00	1.09
2019-02-02 11:00:00	0.87
2019-02-02 12:00:00	0.72
2019-02-02 13:00:00	0.68
2019-02-02 14:00:00	0.74
2019-02-02 15:00:00	0.9
2019-02-02 16:00:00	1.13
2019-02-02 17:00:00	1.38
2019-02-02 18:00:00	1.59
2019-02-02 19:00:00	1.74
2019-02-02 20:00:00	1.79
2019-02-02 21:00:00	1.74
2019-02-02 22:00:00	1.62
2019-02-02 23:00:00	1.48
2019-02-03	1.36
2019-02-03 01:00:00	1.32
2019-02-03 02:00:00	1.35
2019-02-03 03:00:00	1.46
2019-02-03 04:00:00	1.6
2019-02-03 05:00:00	1.74
2019-02-03 06:00:00	1.83
2019-02-03 07:00:00	1.84
2019-02-03 08:00:00	1.73
2019-02-03 09:00:00	1.51
2019-02-03 10:00:00	1.25
2019-02-03 11:00:00	1
2019-02-03 12:00:00	0.8
2019-02-03 13:00:00	0.71
2019-02-03 14:00:00	0.75
2019-02-03 15:00:00	0.91
2019-02-03 16:00:00	1.15
2019-02-03 17:00:00	1.43
2019-02-03 18:00:00	1.69
2019-02-03 19:00:00	1.88
2019-02-03 20:00:00	1.99
2019-02-03 21:00:00	1.99
2019-02-03 22:00:00	1.89
2019-02-03 23:00:00	1.73
2019-02-04	1.55
2019-02-04 01:00:00	1.43
2019-02-04 02:00:00	1.4
2019-02-04 03:00:00	1.48
2019-02-04 04:00:00	1.62
2019-02-04 05:00:00	1.79
2019-02-04 06:00:00	1.92
2019-02-04 07:00:00	1.97
2019-02-04 08:00:00	1.9
2019-02-04 09:00:00	1.69
2019-02-04 10:00:00	1.41
2019-02-04 11:00:00	1.09
2019-02-04 12:00:00	0.81
2019-02-04 13:00:00	0.62
2019-02-04 14:00:00	0.57
2019-02-04 15:00:00	0.64
2019-02-04 16:00:00	0.83
2019-02-04 17:00:00	1.1
2019-02-04 18:00:00	1.38
2019-02-04 19:00:00	1.62
2019-02-04 20:00:00	1.79
2019-02-04 21:00:00	1.83
2019-02-04 22:00:00	1.75
2019-02-04 23:00:00	1.58
2019-02-05	1.39
2019-02-05 01:00:00	1.24
2019-02-05 02:00:00	1.17
2019-02-05 03:00:00	1.2
2019-02-05 04:00:00	1.33
2019-02-05 05:00:00	1.52
2019-02-05 06:00:00	1.71
2019-02-05 07:00:00	1.84
2019-02-05 08:00:00	1.85
2019-02-05 09:00:00	1.74
2019-02-05 10:00:00	1.51
2019-02-05 11:00:00	1.22
2019-02-05 12:00:00	0.93
2019-02-05 13:00:00	0.69
2019-02-05 14:00:00	0.58
2019-02-05 15:00:00	0.6
2019-02-05 16:00:00	0.75
2019-02-05 17:00:00	1.01
2019-02-05 18:00:00	1.31
2019-02-05 19:00:00	1.6
2019-02-05 20:00:00	1.82
2019-02-05 21:00:00	1.93
2019-02-05 22:00:00	1.9
2019-02-05 23:00:00	1.77
2019-02-06	1.58
2019-02-06 01:00:00	1.4
2019-02-06 02:00:00	1.29
2019-02-06 03:00:00	1.27
2019-02-06 04:00:00	1.36
2019-02-06 05:00:00	1.54
2019-02-06 06:00:00	1.76
2019-02-06 07:00:00	1.96
2019-02-06 08:00:00	2.05
2019-02-06 09:00:00	1.99
2019-02-06 10:00:00	1.8
2019-02-06 11:00:00	1.53
2019-02-06 12:00:00	1.21
2019-02-06 13:00:00	0.92
2019-02-06 14:00:00	0.73
2019-02-06 15:00:00	0.67
2019-02-06 16:00:00	0.76
2019-02-06 17:00:00	0.97
2019-02-06 18:00:00	1.24
2019-02-06 19:00:00	1.55
2019-02-06 20:00:00	1.81
2019-02-06 21:00:00	1.96
2019-02-06 22:00:00	1.98
2019-02-06 23:00:00	1.87
2019-02-07	1.69
2019-02-07 01:00:00	1.49
2019-02-07 02:00:00	1.34
2019-02-07 03:00:00	1.28
2019-02-07 04:00:00	1.33
2019-02-07 05:00:00	1.49
2019-02-07 06:00:00	1.71
2019-02-07 07:00:00	1.93
2019-02-07 08:00:00	2.06
2019-02-07 09:00:00	2.08
2019-02-07 10:00:00	1.96
2019-02-07 11:00:00	1.74
2019-02-07 12:00:00	1.45
2019-02-07 13:00:00	1.16
2019-02-07 14:00:00	0.94
2019-02-07 15:00:00	0.83
2019-02-07 16:00:00	0.85
2019-02-07 17:00:00	0.99
2019-02-07 18:00:00	1.21
2019-02-07 19:00:00	1.47
2019-02-07 20:00:00	1.73
2019-02-07 21:00:00	1.9
2019-02-07 22:00:00	1.96
2019-02-07 23:00:00	1.89
2019-02-08	1.72
2019-02-08 01:00:00	1.5
2019-02-08 02:00:00	1.3
2019-02-08 03:00:00	1.18
2019-02-08 04:00:00	1.16
2019-02-08 05:00:00	1.27
2019-02-08 06:00:00	1.45
2019-02-08 07:00:00	1.66
2019-02-08 08:00:00	1.84
2019-02-08 09:00:00	1.92
2019-02-08 10:00:00	1.88
2019-02-08 11:00:00	1.73
2019-02-08 12:00:00	1.5
2019-02-08 13:00:00	1.24
2019-02-08 14:00:00	1.01
2019-02-08 15:00:00	0.85
2019-02-08 16:00:00	0.81
2019-02-08 17:00:00	0.91
2019-02-08 18:00:00	1.09
2019-02-08 19:00:00	1.34
2019-02-08 20:00:00	1.6
2019-02-08 21:00:00	1.81
2019-02-08 22:00:00	1.92
2019-02-08 23:00:00	1.91
2019-02-09	1.78
2019-02-09 01:00:00	1.58
2019-02-09 02:00:00	1.37
2019-02-09 03:00:00	1.22
2019-02-09 04:00:00	1.15
2019-02-09 05:00:00	1.2
2019-02-09 06:00:00	1.34
2019-02-09 07:00:00	1.53
2019-02-09 08:00:00	1.71
2019-02-09 09:00:00	1.84
2019-02-09 10:00:00	1.88
2019-02-09 11:00:00	1.8
2019-02-09 12:00:00	1.64
2019-02-09 13:00:00	1.43
2019-02-09 14:00:00	1.2
2019-02-09 15:00:00	1.02
2019-02-09 16:00:00	0.93
2019-02-09 17:00:00	0.96
2019-02-09 18:00:00	1.1
2019-02-09 19:00:00	1.3
2019-02-09 20:00:00	1.53
2019-02-09 21:00:00	1.74
2019-02-09 22:00:00	1.87
2019-02-09 23:00:00	1.89
2019-02-10	1.81
2019-02-10 01:00:00	1.65
2019-02-10 02:00:00	1.44
2019-02-10 03:00:00	1.24
2019-02-10 04:00:00	1.11
2019-02-10 05:00:00	1.08
2019-02-10 06:00:00	1.15
2019-02-10 07:00:00	1.29
2019-02-10 08:00:00	1.46
2019-02-10 09:00:00	1.61
2019-02-10 10:00:00	1.7
2019-02-10 11:00:00	1.7
2019-02-10 12:00:00	1.62
2019-02-10 13:00:00	1.47
2019-02-10 14:00:00	1.29
2019-02-10 15:00:00	1.11
2019-02-10 16:00:00	1
2019-02-10 17:00:00	0.99
2019-02-10 18:00:00	1.05
2019-02-10 19:00:00	1.2
2019-02-10 20:00:00	1.39
2019-02-10 21:00:00	1.6
2019-02-10 22:00:00	1.75
2019-02-10 23:00:00	1.82
2019-02-11	1.79
2019-02-11 01:00:00	1.67
2019-02-11 02:00:00	1.5
2019-02-11 03:00:00	1.31
2019-02-11 04:00:00	1.15
2019-02-11 05:00:00	1.07
2019-02-11 06:00:00	1.08
2019-02-11 07:00:00	1.18
2019-02-11 08:00:00	1.33
2019-02-11 09:00:00	1.48
2019-02-11 10:00:00	1.61
2019-02-11 11:00:00	1.67
2019-02-11 12:00:00	1.66
2019-02-11 13:00:00	1.59
2019-02-11 14:00:00	1.45
2019-02-11 15:00:00	1.3
2019-02-11 16:00:00	1.17
2019-02-11 17:00:00	1.1
2019-02-11 18:00:00	1.11
2019-02-11 19:00:00	1.2
2019-02-11 20:00:00	1.34
2019-02-11 21:00:00	1.5
2019-02-11 22:00:00	1.65
2019-02-11 23:00:00	1.73
2019-02-12	1.75
2019-02-12 01:00:00	1.69
2019-02-12 02:00:00	1.55
2019-02-12 03:00:00	1.38
2019-02-12 04:00:00	1.21
2019-02-12 05:00:00	1.08
2019-02-12 06:00:00	1.01
2019-02-12 07:00:00	1.03
2019-02-12 08:00:00	1.11
2019-02-12 09:00:00	1.22
2019-02-12 10:00:00	1.35
2019-02-12 11:00:00	1.45
2019-02-12 12:00:00	1.5
2019-02-12 13:00:00	1.5
2019-02-12 14:00:00	1.45
2019-02-12 15:00:00	1.38
2019-02-12 16:00:00	1.29
2019-02-12 17:00:00	1.24
2019-02-12 18:00:00	1.23
2019-02-12 19:00:00	1.27
2019-02-12 20:00:00	1.37
2019-02-12 21:00:00	1.49
2019-02-12 22:00:00	1.61
2019-02-12 23:00:00	1.7
2019-02-13	1.74
2019-02-13 01:00:00	1.72
2019-02-13 02:00:00	1.63
2019-02-13 03:00:00	1.51
2019-02-13 04:00:00	1.35
2019-02-13 05:00:00	1.2
2019-02-13 06:00:00	1.08
2019-02-13 07:00:00	1.02
2019-02-13 08:00:00	1.01
2019-02-13 09:00:00	1.06
2019-02-13 10:00:00	1.15
2019-02-13 11:00:00	1.26
2019-02-13 12:00:00	1.37
2019-02-13 13:00:00	1.45
2019-02-13 14:00:00	1.49
2019-02-13 15:00:00	1.48
2019-02-13 16:00:00	1.45
2019-02-13 17:00:00	1.4
2019-02-13 18:00:00	1.36
2019-02-13 19:00:00	1.35
2019-02-13 20:00:00	1.37
2019-02-13 21:00:00	1.43
2019-02-13 22:00:00	1.51
2019-02-13 23:00:00	1.59
2019-02-14	1.65
2019-02-14 01:00:00	1.67
2019-02-14 02:00:00	1.64
2019-02-14 03:00:00	1.57
2019-02-14 04:00:00	1.45
2019-02-14 05:00:00	1.3
2019-02-14 06:00:00	1.15
2019-02-14 07:00:00	1.02
2019-02-14 08:00:00	0.92
2019-02-14 09:00:00	0.87
2019-02-14 10:00:00	0.9
2019-02-14 11:00:00	0.98
2019-02-14 12:00:00	1.09
2019-02-14 13:00:00	1.21
2019-02-14 14:00:00	1.32
2019-02-14 15:00:00	1.41
2019-02-14 16:00:00	1.47
2019-02-14 17:00:00	1.49
2019-02-14 18:00:00	1.48
2019-02-14 19:00:00	1.44
2019-02-14 20:00:00	1.42
2019-02-14 21:00:00	1.43
2019-02-14 22:00:00	1.46
2019-02-14 23:00:00	1.51
2019-02-15	1.57
2019-02-15 01:00:00	1.62
2019-02-15 02:00:00	1.65
2019-02-15 03:00:00	1.65
2019-02-15 04:00:00	1.59
2019-02-15 05:00:00	1.49
2019-02-15 06:00:00	1.34
2019-02-15 07:00:00	1.17
2019-02-15 08:00:00	1
2019-02-15 09:00:00	0.87
2019-02-15 10:00:00	0.81
2019-02-15 11:00:00	0.82
2019-02-15 12:00:00	0.91
2019-02-15 13:00:00	1.06
2019-02-15 14:00:00	1.24
2019-02-15 15:00:00	1.42
2019-02-15 16:00:00	1.58
2019-02-15 17:00:00	1.69
2019-02-15 18:00:00	1.73
2019-02-15 19:00:00	1.72
2019-02-15 20:00:00	1.67
2019-02-15 21:00:00	1.61
2019-02-15 22:00:00	1.57
2019-02-15 23:00:00	1.56
2019-02-16	1.58
2019-02-16 01:00:00	1.64
2019-02-16 02:00:00	1.72
2019-02-16 03:00:00	1.8
2019-02-16 04:00:00	1.83
2019-02-16 05:00:00	1.79
2019-02-16 06:00:00	1.68
2019-02-16 07:00:00	1.49
2019-02-16 08:00:00	1.26
2019-02-16 09:00:00	1.03
2019-02-16 10:00:00	0.84
2019-02-16 11:00:00	0.73
2019-02-16 12:00:00	0.72
2019-02-16 13:00:00	0.82
2019-02-16 14:00:00	1.01
2019-02-16 15:00:00	1.24
2019-02-16 16:00:00	1.47
2019-02-16 17:00:00	1.67
2019-02-16 18:00:00	1.79
2019-02-16 19:00:00	1.83
2019-02-16 20:00:00	1.78
2019-02-16 21:00:00	1.69
2019-02-16 22:00:00	1.58
2019-02-16 23:00:00	1.49
2019-02-17	1.46
2019-02-17 01:00:00	1.48
2019-02-17 02:00:00	1.57
2019-02-17 03:00:00	1.69
2019-02-17 04:00:00	1.79
2019-02-17 05:00:00	1.84
2019-02-17 06:00:00	1.8
2019-02-17 07:00:00	1.65
2019-02-17 08:00:00	1.41
2019-02-17 09:00:00	1.13
2019-02-17 10:00:00	0.85
2019-02-17 11:00:00	0.62
2019-02-17 12:00:00	0.5
2019-02-17 13:00:00	0.52
2019-02-17 14:00:00	0.66
2019-02-17 15:00:00	0.9
2019-02-17 16:00:00	1.19
2019-02-17 17:00:00	1.48
2019-02-17 18:00:00	1.7
2019-02-17 19:00:00	1.82
2019-02-17 20:00:00	1.83
2019-02-17 21:00:00	1.74
2019-02-17 22:00:00	1.58
2019-02-17 23:00:00	1.42
2019-02-18	1.31
2019-02-18 01:00:00	1.29
2019-02-18 02:00:00	1.35
2019-02-18 03:00:00	1.49
2019-02-18 04:00:00	1.66
2019-02-18 05:00:00	1.81
2019-02-18 06:00:00	1.88
2019-02-18 07:00:00	1.83
2019-02-18 08:00:00	1.65
2019-02-18 09:00:00	1.36
2019-02-18 10:00:00	1.02
2019-02-18 11:00:00	0.7
2019-02-18 12:00:00	0.45
2019-02-18 13:00:00	0.34
2019-02-18 14:00:00	0.39
2019-02-18 15:00:00	0.59
2019-02-18 16:00:00	0.89
2019-02-18 17:00:00	1.23
2019-02-18 18:00:00	1.55
2019-02-18 19:00:00	1.77
2019-02-18 20:00:00	1.88
2019-02-18 21:00:00	1.85
2019-02-18 22:00:00	1.7
2019-02-18 23:00:00	1.49
2019-02-19	1.31
2019-02-19 01:00:00	1.2
2019-02-19 02:00:00	1.21
2019-02-19 03:00:00	1.34
2019-02-19 04:00:00	1.54
2019-02-19 05:00:00	1.76
2019-02-19 06:00:00	1.95
2019-02-19 07:00:00	2.03
2019-02-19 08:00:00	1.96
2019-02-19 09:00:00	1.74
2019-02-19 10:00:00	1.41
2019-02-19 11:00:00	1.05
2019-02-19 12:00:00	0.74
2019-02-19 13:00:00	0.53
2019-02-19 14:00:00	0.46
2019-02-19 15:00:00	0.56
2019-02-19 16:00:00	0.81
2019-02-19 17:00:00	1.15
2019-02-19 18:00:00	1.51
2019-02-19 19:00:00	1.82
2019-02-19 20:00:00	1.99
2019-02-19 21:00:00	2.01
2019-02-19 22:00:00	1.89
2019-02-19 23:00:00	1.68
2019-02-20	1.44
2019-02-20 01:00:00	1.25
2019-02-20 02:00:00	1.17
2019-02-20 03:00:00	1.22
2019-02-20 04:00:00	1.39
2019-02-20 05:00:00	1.63
2019-02-20 06:00:00	1.88
2019-02-20 07:00:00	2.06
2019-02-20 08:00:00	2.09
2019-02-20 09:00:00	1.97
2019-02-20 10:00:00	1.7
2019-02-20 11:00:00	1.34
2019-02-20 12:00:00	0.97
2019-02-20 13:00:00	0.66
2019-02-20 14:00:00	0.48
2019-02-20 15:00:00	0.47
2019-02-20 16:00:00	0.62
2019-02-20 17:00:00	0.9
2019-02-20 18:00:00	1.23
2019-02-20 19:00:00	1.56
2019-02-20 20:00:00	1.82
2019-02-20 21:00:00	1.94
2019-02-20 22:00:00	1.9
2019-02-20 23:00:00	1.72
2019-02-21	1.47
2019-02-21 01:00:00	1.23
2019-02-21 02:00:00	1.06
2019-02-21 03:00:00	1.01
2019-02-21 04:00:00	1.11
2019-02-21 05:00:00	1.31
2019-02-21 06:00:00	1.58
2019-02-21 07:00:00	1.84
2019-02-21 08:00:00	2
2019-02-21 09:00:00	2.01
2019-02-21 10:00:00	1.85
2019-02-21 11:00:00	1.57
2019-02-21 12:00:00	1.21
2019-02-21 13:00:00	0.87
2019-02-21 14:00:00	0.62
2019-02-21 15:00:00	0.5
2019-02-21 16:00:00	0.55
2019-02-21 17:00:00	0.74
2019-02-21 18:00:00	1.03
2019-02-21 19:00:00	1.36
2019-02-21 20:00:00	1.65
2019-02-21 21:00:00	1.84
2019-02-21 22:00:00	1.86
2019-02-21 23:00:00	1.73
2019-02-22	1.5
2019-02-22 01:00:00	1.24
2019-02-22 02:00:00	1.03
2019-02-22 03:00:00	0.91
2019-02-22 04:00:00	0.93
2019-02-22 05:00:00	1.07
2019-02-22 06:00:00	1.31
2019-02-22 07:00:00	1.58
2019-02-22 08:00:00	1.8
2019-02-22 09:00:00	1.92
2019-02-22 10:00:00	1.91
2019-02-22 11:00:00	1.76
2019-02-22 12:00:00	1.51
2019-02-22 13:00:00	1.22
2019-02-22 14:00:00	0.94
2019-02-22 15:00:00	0.76
2019-02-22 16:00:00	0.74
2019-02-22 17:00:00	0.85
2019-02-22 18:00:00	1.07
2019-02-22 19:00:00	1.36
2019-02-22 20:00:00	1.66
2019-02-22 21:00:00	1.88
2019-02-22 22:00:00	1.96
2019-02-22 23:00:00	1.9
2019-02-23	1.71
2019-02-23 01:00:00	1.46
2019-02-23 02:00:00	1.22
2019-02-23 03:00:00	1.03
2019-02-23 04:00:00	0.95
2019-02-23 05:00:00	1
2019-02-23 06:00:00	1.17
2019-02-23 07:00:00	1.4
2019-02-23 08:00:00	1.62
2019-02-23 09:00:00	1.78
2019-02-23 10:00:00	1.84
2019-02-23 11:00:00	1.79
2019-02-23 12:00:00	1.63
2019-02-23 13:00:00	1.4
2019-02-23 14:00:00	1.15
2019-02-23 15:00:00	0.95
2019-02-23 16:00:00	0.84
2019-02-23 17:00:00	0.86
2019-02-23 18:00:00	1
2019-02-23 19:00:00	1.22
2019-02-23 20:00:00	1.47
2019-02-23 21:00:00	1.68
2019-02-23 22:00:00	1.81
2019-02-23 23:00:00	1.81
2019-02-24	1.68
2019-02-24 01:00:00	1.46
2019-02-24 02:00:00	1.22
2019-02-24 03:00:00	1.01
2019-02-24 04:00:00	0.88
2019-02-24 05:00:00	0.85
2019-02-24 06:00:00	0.93
2019-02-24 07:00:00	1.09
2019-02-24 08:00:00	1.29
2019-02-24 09:00:00	1.47
2019-02-24 10:00:00	1.6
2019-02-24 11:00:00	1.65
2019-02-24 12:00:00	1.6
2019-02-24 13:00:00	1.47
2019-02-24 14:00:00	1.3
2019-02-24 15:00:00	1.14
2019-02-24 16:00:00	1.03
2019-02-24 17:00:00	1.01
2019-02-24 18:00:00	1.09
2019-02-24 19:00:00	1.23
2019-02-24 20:00:00	1.43
2019-02-24 21:00:00	1.64
2019-02-24 22:00:00	1.78
2019-02-24 23:00:00	1.83
2019-02-25	1.76
2019-02-25 01:00:00	1.61
2019-02-25 02:00:00	1.39
2019-02-25 03:00:00	1.17
2019-02-25 04:00:00	0.99
2019-02-25 05:00:00	0.9
2019-02-25 06:00:00	0.89
2019-02-25 07:00:00	0.97
2019-02-25 08:00:00	1.12
2019-02-25 09:00:00	1.28
2019-02-25 10:00:00	1.42
2019-02-25 11:00:00	1.51
2019-02-25 12:00:00	1.54
2019-02-25 13:00:00	1.5
2019-02-25 14:00:00	1.42
2019-02-25 15:00:00	1.31
2019-02-25 16:00:00	1.21
2019-02-25 17:00:00	1.15
2019-02-25 18:00:00	1.16
2019-02-25 19:00:00	1.25
2019-02-25 20:00:00	1.4
2019-02-25 21:00:00	1.56
2019-02-25 22:00:00	1.69
2019-02-25 23:00:00	1.75
2019-02-26	1.73
2019-02-26 01:00:00	1.64
2019-02-26 02:00:00	1.48
2019-02-26 03:00:00	1.3
2019-02-26 04:00:00	1.13
2019-02-26 05:00:00	0.99
2019-02-26 06:00:00	0.91
2019-02-26 07:00:00	0.92
2019-02-26 08:00:00	0.99
2019-02-26 09:00:00	1.09
2019-02-26 10:00:00	1.2
2019-02-26 11:00:00	1.31
2019-02-26 12:00:00	1.39
2019-02-26 13:00:00	1.43
2019-02-26 14:00:00	1.43
2019-02-26 15:00:00	1.4
2019-02-26 16:00:00	1.35
2019-02-26 17:00:00	1.32
2019-02-26 18:00:00	1.31
2019-02-26 19:00:00	1.33
2019-02-26 20:00:00	1.39
2019-02-26 21:00:00	1.49
2019-02-26 22:00:00	1.59
2019-02-26 23:00:00	1.66
2019-02-27	1.67
2019-02-27 01:00:00	1.62
2019-02-27 02:00:00	1.53
2019-02-27 03:00:00	1.4
2019-02-27 04:00:00	1.26
2019-02-27 05:00:00	1.12
2019-02-27 06:00:00	1
2019-02-27 07:00:00	0.94
2019-02-27 08:00:00	0.92
2019-02-27 09:00:00	0.95
2019-02-27 10:00:00	1.01
2019-02-27 11:00:00	1.09
2019-02-27 12:00:00	1.19
2019-02-27 13:00:00	1.28
2019-02-27 14:00:00	1.35
2019-02-27 15:00:00	1.4
2019-02-27 16:00:00	1.43
2019-02-27 17:00:00	1.44
2019-02-27 18:00:00	1.44
2019-02-27 19:00:00	1.45
2019-02-27 20:00:00	1.47
2019-02-27 21:00:00	1.51
2019-02-27 22:00:00	1.56
2019-02-27 23:00:00	1.61
2019-02-28	1.64
2019-02-28 01:00:00	1.65
2019-02-28 02:00:00	1.62
2019-02-28 03:00:00	1.56
2019-02-28 04:00:00	1.48
2019-02-28 05:00:00	1.38
2019-02-28 06:00:00	1.27
2019-02-28 07:00:00	1.16
2019-02-28 08:00:00	1.07
2019-02-28 09:00:00	1.01
2019-02-28 10:00:00	1
2019-02-28 11:00:00	1.02
2019-02-28 12:00:00	1.09
2019-02-28 13:00:00	1.18
2019-02-28 14:00:00	1.29
2019-02-28 15:00:00	1.39
2019-02-28 16:00:00	1.47
2019-02-28 17:00:00	1.53
2019-02-28 18:00:00	1.55
2019-02-28 19:00:00	1.54
2019-02-28 20:00:00	1.52
2019-02-28 21:00:00	1.51
2019-02-28 22:00:00	1.5
2019-02-28 23:00:00	1.5
2019-03-01	1.52
2019-03-01 01:00:00	1.55
2019-03-01 02:00:00	1.57
2019-03-01 03:00:00	1.57
2019-03-01 04:00:00	1.54
2019-03-01 05:00:00	1.48
2019-03-01 06:00:00	1.38
2019-03-01 07:00:00	1.25
2019-03-01 08:00:00	1.11
2019-03-01 09:00:00	0.98
2019-03-01 10:00:00	0.9
2019-03-01 11:00:00	0.87
2019-03-01 12:00:00	0.9
2019-03-01 13:00:00	0.99
2019-03-01 14:00:00	1.12
2019-03-01 15:00:00	1.28
2019-03-01 16:00:00	1.42
2019-03-01 17:00:00	1.54
2019-03-01 18:00:00	1.6
2019-03-01 19:00:00	1.6
2019-03-01 20:00:00	1.56
2019-03-01 21:00:00	1.51
2019-03-01 22:00:00	1.45
2019-03-01 23:00:00	1.41
2019-03-02	1.42
2019-03-02 01:00:00	1.45
2019-03-02 02:00:00	1.51
2019-03-02 03:00:00	1.57
2019-03-02 04:00:00	1.61
2019-03-02 05:00:00	1.6
2019-03-02 06:00:00	1.53
2019-03-02 07:00:00	1.4
2019-03-02 08:00:00	1.23
2019-03-02 09:00:00	1.05
2019-03-02 10:00:00	0.9
2019-03-02 11:00:00	0.8
2019-03-02 12:00:00	0.78
2019-03-02 13:00:00	0.84
2019-03-02 14:00:00	0.97
2019-03-02 15:00:00	1.15
2019-03-02 16:00:00	1.35
2019-03-02 17:00:00	1.53
2019-03-02 18:00:00	1.66
2019-03-02 19:00:00	1.72
2019-03-02 20:00:00	1.7
2019-03-02 21:00:00	1.62
2019-03-02 22:00:00	1.51
2019-03-02 23:00:00	1.41
2019-03-03	1.36
2019-03-03 01:00:00	1.37
2019-03-03 02:00:00	1.45
2019-03-03 03:00:00	1.56
2019-03-03 04:00:00	1.66
2019-03-03 05:00:00	1.73
2019-03-03 06:00:00	1.73
2019-03-03 07:00:00	1.65
2019-03-03 08:00:00	1.5
2019-03-03 09:00:00	1.28
2019-03-03 10:00:00	1.07
2019-03-03 11:00:00	0.9
2019-03-03 12:00:00	0.81
2019-03-03 13:00:00	0.82
2019-03-03 14:00:00	0.93
2019-03-03 15:00:00	1.13
2019-03-03 16:00:00	1.36
2019-03-03 17:00:00	1.59
2019-03-03 18:00:00	1.79
2019-03-03 19:00:00	1.91
2019-03-03 20:00:00	1.93
2019-03-03 21:00:00	1.85
2019-03-03 22:00:00	1.71
2019-03-03 23:00:00	1.57
2019-03-04	1.47
2019-03-04 01:00:00	1.44
2019-03-04 02:00:00	1.49
2019-03-04 03:00:00	1.61
2019-03-04 04:00:00	1.76
2019-03-04 05:00:00	1.89
2019-03-04 06:00:00	1.96
2019-03-04 07:00:00	1.94
2019-03-04 08:00:00	1.8
2019-03-04 09:00:00	1.56
2019-03-04 10:00:00	1.29
2019-03-04 11:00:00	1.04
2019-03-04 12:00:00	0.86
2019-03-04 13:00:00	0.78
2019-03-04 14:00:00	0.83
2019-03-04 15:00:00	0.98
2019-03-04 16:00:00	1.2
2019-03-04 17:00:00	1.45
2019-03-04 18:00:00	1.67
2019-03-04 19:00:00	1.81
2019-03-04 20:00:00	1.85
2019-03-04 21:00:00	1.79
2019-03-04 22:00:00	1.65
2019-03-04 23:00:00	1.46
2019-03-05	1.3
2019-03-05 01:00:00	1.21
2019-03-05 02:00:00	1.23
2019-03-05 03:00:00	1.34
2019-03-05 04:00:00	1.51
2019-03-05 05:00:00	1.69
2019-03-05 06:00:00	1.83
2019-03-05 07:00:00	1.88
2019-03-05 08:00:00	1.81
2019-03-05 09:00:00	1.63
2019-03-05 10:00:00	1.37
2019-03-05 11:00:00	1.09
2019-03-05 12:00:00	0.85
2019-03-05 13:00:00	0.71
2019-03-05 14:00:00	0.69
2019-03-05 15:00:00	0.81
2019-03-05 16:00:00	1.04
2019-03-05 17:00:00	1.3
2019-03-05 18:00:00	1.57
2019-03-05 19:00:00	1.78
2019-03-05 20:00:00	1.88
2019-03-05 21:00:00	1.85
2019-03-05 22:00:00	1.71
2019-03-05 23:00:00	1.51
2019-03-06	1.31
2019-03-06 01:00:00	1.18
2019-03-06 02:00:00	1.14
2019-03-06 03:00:00	1.23
2019-03-06 04:00:00	1.42
2019-03-06 05:00:00	1.64
2019-03-06 06:00:00	1.85
2019-03-06 07:00:00	1.99
2019-03-06 08:00:00	2.01
2019-03-06 09:00:00	1.88
2019-03-06 10:00:00	1.63
2019-03-06 11:00:00	1.32
2019-03-06 12:00:00	1.03
2019-03-06 13:00:00	0.83
2019-03-06 14:00:00	0.76
2019-03-06 15:00:00	0.83
2019-03-06 16:00:00	1.03
2019-03-06 17:00:00	1.31
2019-03-06 18:00:00	1.61
2019-03-06 19:00:00	1.88
2019-03-06 20:00:00	2.05
2019-03-06 21:00:00	2.06
2019-03-06 22:00:00	1.94
2019-03-06 23:00:00	1.72
2019-03-07	1.48
2019-03-07 01:00:00	1.28
2019-03-07 02:00:00	1.17
2019-03-07 03:00:00	1.2
2019-03-07 04:00:00	1.35
2019-03-07 05:00:00	1.58
2019-03-07 06:00:00	1.82
2019-03-07 07:00:00	2.02
2019-03-07 08:00:00	2.09
2019-03-07 09:00:00	2.01
2019-03-07 10:00:00	1.81
2019-03-07 11:00:00	1.52
2019-03-07 12:00:00	1.21
2019-03-07 13:00:00	0.96
2019-03-07 14:00:00	0.82
2019-03-07 15:00:00	0.81
2019-03-07 16:00:00	0.94
2019-03-07 17:00:00	1.17
2019-03-07 18:00:00	1.44
2019-03-07 19:00:00	1.7
2019-03-07 20:00:00	1.89
2019-03-07 21:00:00	1.95
2019-03-07 22:00:00	1.85
2019-03-07 23:00:00	1.64
2019-03-08	1.39
2019-03-08 01:00:00	1.16
2019-03-08 02:00:00	1.02
2019-03-08 03:00:00	1
2019-03-08 04:00:00	1.11
2019-03-08 05:00:00	1.32
2019-03-08 06:00:00	1.58
2019-03-08 07:00:00	1.83
2019-03-08 08:00:00	1.99
2019-03-08 09:00:00	2.01
2019-03-08 10:00:00	1.88
2019-03-08 11:00:00	1.64
2019-03-08 12:00:00	1.33
2019-03-08 13:00:00	1.05
2019-03-08 14:00:00	0.85
2019-03-08 15:00:00	0.78
2019-03-08 16:00:00	0.85
2019-03-08 17:00:00	1.03
2019-03-08 18:00:00	1.29
2019-03-08 19:00:00	1.56
2019-03-08 20:00:00	1.78
2019-03-08 21:00:00	1.9
2019-03-08 22:00:00	1.86
2019-03-08 23:00:00	1.68
2019-03-09	1.42
2019-03-09 01:00:00	1.16
2019-03-09 02:00:00	0.96
2019-03-09 03:00:00	0.88
2019-03-09 04:00:00	0.93
2019-03-09 05:00:00	1.09
2019-03-09 06:00:00	1.34
2019-03-09 07:00:00	1.62
2019-03-09 08:00:00	1.84
2019-03-09 09:00:00	1.94
2019-03-09 10:00:00	1.89
2019-03-09 11:00:00	1.7
2019-03-09 12:00:00	1.44
2019-03-09 13:00:00	1.17
2019-03-09 14:00:00	0.95
2019-03-09 15:00:00	0.83
2019-03-09 16:00:00	0.85
2019-03-09 17:00:00	0.99
2019-03-09 18:00:00	1.22
2019-03-09 19:00:00	1.48
2019-03-09 20:00:00	1.72
2019-03-09 21:00:00	1.87
2019-03-09 22:00:00	1.9
2019-03-09 23:00:00	1.77
2019-03-10	1.55
2019-03-10 01:00:00	1.29
2019-03-10 02:00:00	1.06
2019-03-10 03:00:00	0.91
2019-03-10 04:00:00	0.89
2019-03-10 05:00:00	1
2019-03-10 06:00:00	1.21
2019-03-10 07:00:00	1.47
2019-03-10 08:00:00	1.73
2019-03-10 09:00:00	1.9
2019-03-10 10:00:00	1.95
2019-03-10 11:00:00	1.88
2019-03-10 12:00:00	1.7
2019-03-10 13:00:00	1.48
2019-03-10 14:00:00	1.27
2019-03-10 15:00:00	1.15
2019-03-10 16:00:00	1.13
2019-03-10 17:00:00	1.24
2019-03-10 18:00:00	1.46
2019-03-10 19:00:00	1.73
2019-03-10 20:00:00	2
2019-03-10 21:00:00	2.2
2019-03-10 22:00:00	2.27
2019-03-10 23:00:00	2.19
2019-03-11	2
2019-03-11 01:00:00	1.73
2019-03-11 02:00:00	1.45
2019-03-11 03:00:00	1.25
2019-03-11 04:00:00	1.17
2019-03-11 05:00:00	1.2
2019-03-11 06:00:00	1.33
2019-03-11 07:00:00	1.54
2019-03-11 08:00:00	1.77
2019-03-11 09:00:00	1.96
2019-03-11 10:00:00	2.06
2019-03-11 11:00:00	2.06
2019-03-11 12:00:00	1.95
2019-03-11 13:00:00	1.75
2019-03-11 14:00:00	1.53
2019-03-11 15:00:00	1.35
2019-03-11 16:00:00	1.26
2019-03-11 17:00:00	1.28
2019-03-11 18:00:00	1.4
2019-03-11 19:00:00	1.57
2019-03-11 20:00:00	1.77
2019-03-11 21:00:00	1.95
2019-03-11 22:00:00	2.04
2019-03-11 23:00:00	2.02
2019-03-12	1.89
2019-03-12 01:00:00	1.68
2019-03-12 02:00:00	1.45
2019-03-12 03:00:00	1.23
2019-03-12 04:00:00	1.07
2019-03-12 05:00:00	1.02
2019-03-12 06:00:00	1.09
2019-03-12 07:00:00	1.24
2019-03-12 08:00:00	1.45
2019-03-12 09:00:00	1.66
2019-03-12 10:00:00	1.83
2019-03-12 11:00:00	1.9
2019-03-12 12:00:00	1.87
2019-03-12 13:00:00	1.77
2019-03-12 14:00:00	1.62
2019-03-12 15:00:00	1.48
2019-03-12 16:00:00	1.38
2019-03-12 17:00:00	1.36
2019-03-12 18:00:00	1.42
2019-03-12 19:00:00	1.54
2019-03-12 20:00:00	1.7
2019-03-12 21:00:00	1.87
2019-03-12 22:00:00	1.99
2019-03-12 23:00:00	2.02
2019-03-13	1.94
2019-03-13 01:00:00	1.79
2019-03-13 02:00:00	1.59
2019-03-13 03:00:00	1.38
2019-03-13 04:00:00	1.2
2019-03-13 05:00:00	1.09
2019-03-13 06:00:00	1.07
2019-03-13 07:00:00	1.14
2019-03-13 08:00:00	1.27
2019-03-13 09:00:00	1.42
2019-03-13 10:00:00	1.57
2019-03-13 11:00:00	1.67
2019-03-13 12:00:00	1.7
2019-03-13 13:00:00	1.68
2019-03-13 14:00:00	1.6
2019-03-13 15:00:00	1.51
2019-03-13 16:00:00	1.43
2019-03-13 17:00:00	1.38
2019-03-13 18:00:00	1.38
2019-03-13 19:00:00	1.43
2019-03-13 20:00:00	1.54
2019-03-13 21:00:00	1.66
2019-03-13 22:00:00	1.75
2019-03-13 23:00:00	1.78
2019-03-14	1.75
2019-03-14 01:00:00	1.67
2019-03-14 02:00:00	1.52
2019-03-14 03:00:00	1.34
2019-03-14 04:00:00	1.16
2019-03-14 05:00:00	1
2019-03-14 06:00:00	0.91
2019-03-14 07:00:00	0.89
2019-03-14 08:00:00	0.94
2019-03-14 09:00:00	1.04
2019-03-14 10:00:00	1.18
2019-03-14 11:00:00	1.32
2019-03-14 12:00:00	1.44
2019-03-14 13:00:00	1.52
2019-03-14 14:00:00	1.55
2019-03-14 15:00:00	1.55
2019-03-14 16:00:00	1.52
2019-03-14 17:00:00	1.48
2019-03-14 18:00:00	1.45
2019-03-14 19:00:00	1.46
2019-03-14 20:00:00	1.51
2019-03-14 21:00:00	1.58
2019-03-14 22:00:00	1.66
2019-03-14 23:00:00	1.72
2019-03-15	1.75
2019-03-15 01:00:00	1.73
2019-03-15 02:00:00	1.67
2019-03-15 03:00:00	1.56
2019-03-15 04:00:00	1.41
2019-03-15 05:00:00	1.25
2019-03-15 06:00:00	1.11
2019-03-15 07:00:00	1.02
2019-03-15 08:00:00	0.98
2019-03-15 09:00:00	0.99
2019-03-15 10:00:00	1.07
2019-03-15 11:00:00	1.19
2019-03-15 12:00:00	1.32
2019-03-15 13:00:00	1.46
2019-03-15 14:00:00	1.58
2019-03-15 15:00:00	1.67
2019-03-15 16:00:00	1.72
2019-03-15 17:00:00	1.74
2019-03-15 18:00:00	1.72
2019-03-15 19:00:00	1.7
2019-03-15 20:00:00	1.69
2019-03-15 21:00:00	1.7
2019-03-15 22:00:00	1.72
2019-03-15 23:00:00	1.75
2019-03-16	1.78
2019-03-16 01:00:00	1.82
2019-03-16 02:00:00	1.84
2019-03-16 03:00:00	1.81
2019-03-16 04:00:00	1.71
2019-03-16 05:00:00	1.57
2019-03-16 06:00:00	1.39
2019-03-16 07:00:00	1.21
2019-03-16 08:00:00	1.06
2019-03-16 09:00:00	0.95
2019-03-16 10:00:00	0.9
2019-03-16 11:00:00	0.93
2019-03-16 12:00:00	1.03
2019-03-16 13:00:00	1.18
2019-03-16 14:00:00	1.35
2019-03-16 15:00:00	1.52
2019-03-16 16:00:00	1.66
2019-03-16 17:00:00	1.74
2019-03-16 18:00:00	1.76
2019-03-16 19:00:00	1.73
2019-03-16 20:00:00	1.67
2019-03-16 21:00:00	1.61
2019-03-16 22:00:00	1.57
2019-03-16 23:00:00	1.55
2019-03-17	1.58
2019-03-17 01:00:00	1.63
2019-03-17 02:00:00	1.71
2019-03-17 03:00:00	1.79
2019-03-17 04:00:00	1.83
2019-03-17 05:00:00	1.8
2019-03-17 06:00:00	1.68
2019-03-17 07:00:00	1.49
2019-03-17 08:00:00	1.26
2019-03-17 09:00:00	1.04
2019-03-17 10:00:00	0.88
2019-03-17 11:00:00	0.8
2019-03-17 12:00:00	0.82
2019-03-17 13:00:00	0.94
2019-03-17 14:00:00	1.13
2019-03-17 15:00:00	1.35
2019-03-17 16:00:00	1.57
2019-03-17 17:00:00	1.74
2019-03-17 18:00:00	1.83
2019-03-17 19:00:00	1.83
2019-03-17 20:00:00	1.75
2019-03-17 21:00:00	1.62
2019-03-17 22:00:00	1.49
2019-03-17 23:00:00	1.39
2019-03-18	1.35
2019-03-18 01:00:00	1.39
2019-03-18 02:00:00	1.49
2019-03-18 03:00:00	1.62
2019-03-18 04:00:00	1.74
2019-03-18 05:00:00	1.8
2019-03-18 06:00:00	1.8
2019-03-18 07:00:00	1.68
2019-03-18 08:00:00	1.47
2019-03-18 09:00:00	1.2
2019-03-18 10:00:00	0.96
2019-03-18 11:00:00	0.77
2019-03-18 12:00:00	0.7
2019-03-18 13:00:00	0.76
2019-03-18 14:00:00	0.94
2019-03-18 15:00:00	1.2
2019-03-18 16:00:00	1.48
2019-03-18 17:00:00	1.72
2019-03-18 18:00:00	1.89
2019-03-18 19:00:00	1.96
2019-03-18 20:00:00	1.92
2019-03-18 21:00:00	1.79
2019-03-18 22:00:00	1.61
2019-03-18 23:00:00	1.43
2019-03-19	1.31
2019-03-19 01:00:00	1.3
2019-03-19 02:00:00	1.38
2019-03-19 03:00:00	1.55
2019-03-19 04:00:00	1.76
2019-03-19 05:00:00	1.94
2019-03-19 06:00:00	2.03
2019-03-19 07:00:00	2
2019-03-19 08:00:00	1.83
2019-03-19 09:00:00	1.55
2019-03-19 10:00:00	1.23
2019-03-19 11:00:00	0.95
2019-03-19 12:00:00	0.76
2019-03-19 13:00:00	0.7
2019-03-19 14:00:00	0.79
2019-03-19 15:00:00	1
2019-03-19 16:00:00	1.3
2019-03-19 17:00:00	1.61
2019-03-19 18:00:00	1.88
2019-03-19 19:00:00	2.03
2019-03-19 20:00:00	2.03
2019-03-19 21:00:00	1.91
2019-03-19 22:00:00	1.68
[truncated: 6,889 more rows]
